# Supplementary material
Source: PubMed Central journal article supplement (PMC5084079)
Supplement: oc6b00240_si_001.pdf [file oc6b00240_si_001.pdf]

## Supporting Information

### Stereoisomerism in nano hoops with heterogeneous biaryl linkages of *E/Z*- and *R/S*-geometries

Parantap Sarkar, Zhe Sun, Toshiki Tokuhira, Motoko Kotani, Sota Sato and Hiroyuki Isobe

#### Table of contents

|                                                                            |    |
|----------------------------------------------------------------------------|----|
| <b>General</b> .....                                                       | 1  |
| <b>Materials</b> .....                                                     | 2  |
| <b>Synthesis</b> .....                                                     | 2  |
| <b>Crystallographic analysis</b> .....                                     | 5  |
| <b>Stereoisomers</b> .....                                                 | 6  |
| <b>Theoretical calculations</b> .....                                      | 7  |
| <b>NMR analyses</b> .....                                                  | 7  |
| Assignments of <sup>1</sup> H resonances of [8]CPhen <sub>3,9</sub> .....  | 7  |
| VT NMR analyses.....                                                       | 10 |
| <b>Separation of enantiomers</b> .....                                     | 10 |
| <b>VT CD analyses</b> .....                                                | 11 |
| VT CD analyses of (-)-4.....                                               | 11 |
| VT CD analyses of ( <i>E,S,E,S,E,S,E,S</i> )-[8]CPhen <sub>3,9</sub> ..... | 13 |
| <b>Isomerization profile</b> .....                                         | 14 |
| <b>Supplementary data</b> .....                                            | 15 |
| HPLC chromatogram.....                                                     | 15 |
| NMR spectra.....                                                           | 16 |
| Crystallographic data.....                                                 | 21 |
| Cartesian coordinates.....                                                 | 23 |

#### General

All the reactions were performed in N<sub>2</sub> atmosphere except otherwise noted. Flash silica gel column chromatography was performed on silica gel 60N (spherical and neutral gel, 40-50 μm, Kanto). GPC was performed on Japan Analytical Industry LC-9104 with JAIGEL 1H, 2H and 2.5H polystyrene columns with eluent of CHCl<sub>3</sub>. Columns for HPLC are specified in the corresponding sections. Proton (<sup>1</sup>H) and carbon (<sup>13</sup>C) NMR spectra were recorded on a JEOL JNM-ECA II 600

( $^1\text{H}$ : 600 MHz;  $^{13}\text{C}$ : 150 MHz) spectrometer. DEPT spectra were recorded for the assignment of CH, and  $\text{CH}_3$ . Chemical shift values were given in ppm relative to internal chloroform ( $^1\text{H}$  NMR:  $\delta$  7.26,  $^{13}\text{C}$  NMR:  $\delta$  77.16), 1,1,2,2-tetrachloroethane ( $^1\text{H}$  NMR:  $\delta$  5.91,  $^{13}\text{C}$  NMR:  $\delta$  74.08), DMSO ( $^1\text{H}$  NMR:  $\delta$  2.50,  $^{13}\text{C}$  NMR:  $\delta$  39.51) and toluene ( $^1\text{H}$  NMR:  $\delta$  2.08). High-resolution MALDI TOF MS analyses were performed on a Bruker Daltonics solariX 9.4T instrument using tetracyanoquinodimethane as the matrix. CD spectroscopy was performed on a JASCO J-1500 circular dichroism spectrometer.

## Materials

Acetic anhydride, triethylamine, *p*-bromobenzaldehyde, cesium fluoride, iodine, triphenylphosphine, potassium acetate and copper(II) bromide were purchased from Wako. 1,3-Diiodo-5,5-dimethylhydantoin, *p*-tolylacetic acid,  $\text{PdCl}_2(\text{dppf})\cdot\text{CH}_2\text{Cl}_2$ , bis(pinacolato)diboron and *n*-butyllithium in hexane were purchased from TCI. Nitrobenzene, *o*-dichlorobenzene and cyclohexane were purchased from Kanto. 1,4-Dioxane was purchased from Nacalai. Anhydrous 1,2-dichloroethane was purchased from Aldrich.  $\text{PtCl}_2(\text{cod})$  was synthesized as reported in literature.<sup>1</sup> Anhydrous THF (stabilizer free, Kanto) was purified by a solvent purification system (GlassContour) equipped with columns of activated alumina and supported copper catalyst (Q-5).<sup>2</sup> Other solvents were distilled and dried over 4-Å molecular sieves.

## Synthesis

### Compound 1

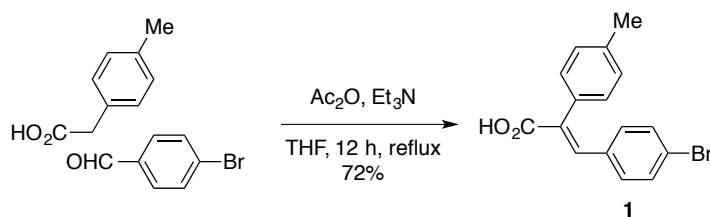

A mixture of *p*-bromobenzaldehyde (12.4 g, 66.6 mmol), *p*-tolylacetic acid (10.0 g, 66.6 mmol), triethylamine (33.6 g, 333 mmol) and acetic anhydride (67.6 g, 666 mmol) was refluxed in THF (320 mL) for 12 h. After removal of volatile materials in vacuo, the residue was dissolved in 20% aqueous potassium hydroxide (500 mL). Dropwise addition of conc. hydrochloric acid (250 mL) afforded crude materials as precipitates. The precipitates were filtered, dried in air and recrystallized from ethanol to afford compound **1** in 72% yield (15.3 g, 48.0 mmol).  $^1\text{H}$  NMR (600

(1) McDermott, J. X.; White, J. F.; Whitesides, G. M. Thermal decomposition of bis(phosphine)platinum(II) metallocycles. *J. Am. Chem. Soc.* **1976**, *98*, 6521-6528.

(2) Pangborn, A. B.; Giardello, M. A.; Grubbs, R. H.; Rosen, R. K.; Timmers, F. J. Safe and convenient procedure for solvent purification. *Organometallics* **1996**, *15*, 1518-1520.

MHz, CDCl<sub>3</sub>)  $\delta$  2.39 (s, 3H), 6.95 (d,  $J$  = 8.6 Hz, 2H), 7.10 (d,  $J$  = 8.2 Hz, 2H), 7.19 (d,  $J$  = 8.2 Hz, 2H), 7.31 (d,  $J$  = 8.6 Hz, 2H), 7.83 (s, 1H) ppm, <sup>13</sup>C NMR (150 MHz, CDCl<sub>3</sub>)  $\delta$  21.5 (CH<sub>3</sub>), 124.4, 129.6 (CH), 129.9 (CH), 131.5, 131.8 (CH), 132.3, 132.4 (CH), 133.2, 138.4, 142.3 (CH), 163.5 ppm. HRMS calcd for C<sub>16</sub>H<sub>13</sub>BrO<sub>2</sub> [M]<sup>+</sup> 316.0093, found 316.0093.

## Compound 2

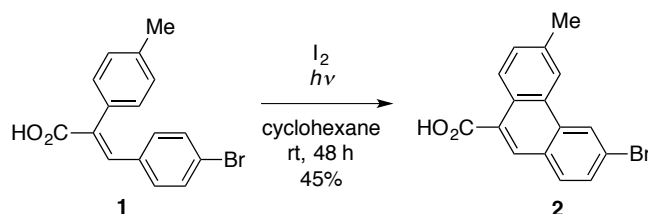

A mixture of compound **1** (10.0 g, 31.6 mmol) and iodine (200 mg, 1.58 mmol) in cyclohexane (2.2 L) was irradiated with 400 W Hg-lamp at room temperature for 48 h under air. Precipitates formed during the reaction was obtained by filtration and washed with hot ethyl acetate (500 mL) to afford analytically pure compound **2** in 45% yield (4.48 g, 14.2 mmol). <sup>1</sup>H NMR (600 MHz, DMSO-*d*<sub>6</sub>)  $\delta$  2.60 (s, 3H), 7.59 (d,  $J$  = 8.3 Hz, 1H), 7.83 (d,  $J$  = 8.3 Hz, 1H), 8.09 (d,  $J$  = 8.3 Hz, 1H), 8.43 (s, 1H), 8.74 (m, 2H) 9.07 (s, 1H) ppm, <sup>13</sup>C NMR (150 MHz, DMSO-*d*<sub>6</sub>)  $\delta$  21.1 (CH<sub>3</sub>), 122.6 (CH), 123.1, 125.4 (CH), 126.0 (CH), 126.6, 127.4, 128.6, 129.2, 129.5 (CH), 129.6 (CH), 130.0 (CH), 131.7 (CH), 132.5, 136.9, 168.4 ppm. HRMS calcd for C<sub>16</sub>H<sub>11</sub>BrO<sub>2</sub> [M]<sup>+</sup> 313.9937, found 313.9937.

## Compound 3

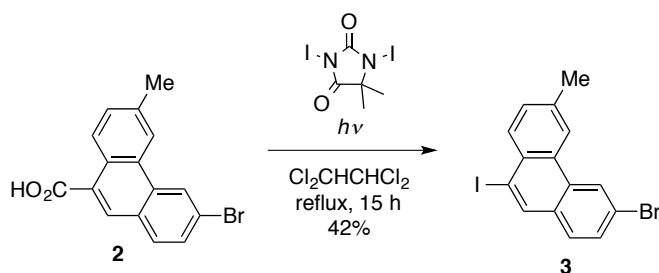

A mixture of compound **2** (1.50 g, 4.76 mmol) and 1,3-diiodo-5,5-dimethylhydantoin (2.71 g, 7.14 mmol) in dichloroethane (160 mL) was irradiated with 100 W tungsten-lamp under reflux conditions for 15 h. The crude mixture was washed with saturated aqueous Na<sub>2</sub>S<sub>2</sub>O<sub>3</sub> and brine and purified by silica gel column chromatography and subsequent GPC to afford compound **3** in 42% yield (794 mg, 2.0 mmol). <sup>1</sup>H NMR (600 MHz, CDCl<sub>3</sub>)  $\delta$  2.65 (s, 3H), 7.52 (dd,  $J$  = 1.4 Hz, 8.6 Hz, 1H), 7.62 (d,  $J$  = 8.6 Hz, 1H), 7.67 (dd,  $J$  = 1.4 Hz, 8.6 Hz, 1H), 8.10 (d,  $J$  = 8.6 Hz, 1H), 8.31 (m, 2H) 8.77 (d,  $J$  = 1.4 Hz, 1H) ppm, <sup>13</sup>C NMR (150 MHz, CDCl<sub>3</sub>)  $\delta$  21.9 (CH<sub>3</sub>), 99.2, 121.4, 122.7

(CH), 125.7 (CH), 129.1 (CH), 129.5, 130.3 (2 CH), 130.5, 131.6, 131.7, 133.3 (CH), 137.0 (CH), 138.0 ppm. HRMS calcd for  $C_{15}H_{10}BrI [M]^+$  395.9005, found 395.9005.

#### Compound 4

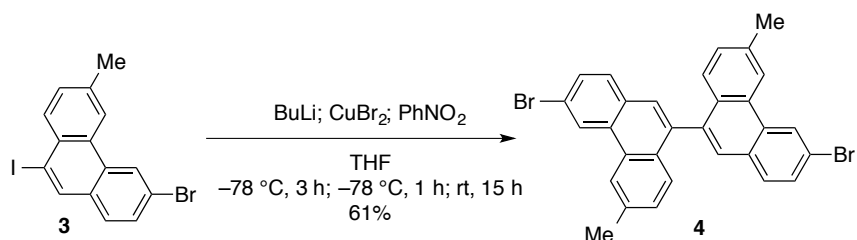

To a solution of compound **3** (650 mg, 1.64 mmol) in THF (33 mL) was added *n*-butyllithium (1.54 M; 1.2 mL, 1.80 mmol) dropwise at -78 °C. After 3 h, CuBr<sub>2</sub> (366 mg, 1.64 mmol) was added, and the mixture was stirred for 1 h at -78 °C. Nitrobenzene (0.84 mL, 8.20 mmol) was added to the mixture. The mixture was warmed to room temperature and stirred for 15 h. After addition of water (20 mL), the crude mixture was diluted with CHCl<sub>3</sub> (200 mL) and washed with brine. Purification with silica gel column chromatography afforded compound **4** in 61% yield (270 mg, 0.50 mmol). For kinetic analysis of the racemization, enantiomers were separated by HPLC using Daicel Chiralpack AD column (20 φ × 250 mm) with 50% MeOH in CHCl<sub>3</sub> as eluent. <sup>1</sup>H NMR (600 MHz, C<sub>2</sub>D<sub>2</sub>Cl<sub>4</sub>) δ 2.53 (s, 6H), 7.16 (d, *J* = 8.3 Hz, 2H), 7.29 (d, *J* = 8.3 Hz, 2H), 7.66 (m, 4H), 7.70 (d, *J* = 8.3 Hz, 2H), 8.42 (s, 2H) 8.83 (s, 2H) ppm, <sup>13</sup>C NMR (150 MHz, C<sub>2</sub>D<sub>2</sub>Cl<sub>4</sub>) δ 22.2 (CH<sub>3</sub>), 121.0, 122.7 (CH), 125.6 (CH), 127.0 (CH), 127.6 (CH), 129.33 (CH), 129.37, 130.2 (CH), 130.3, 130.4 (1 CH, 2 carbons), 131.5, 137.2, 137.5 ppm. HRMS calcd for  $C_{30}H_{20}Br_2 [M]^+$  539.9906, found 539.9905.

#### Compound 5

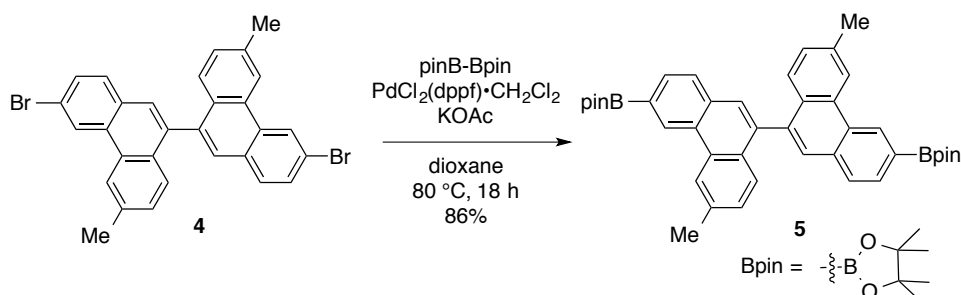

A mixture of compound **4** (222 mg, 0.41 mmol), PdCl<sub>2</sub>(dppf)·CH<sub>2</sub>Cl<sub>2</sub> (67 mg, 0.08 mmol), bis(pinacolato)diboron (313 mg, 1.23 mmol) and potassium acetate (201 mg, 2.05 mmol) in 1,4-dioxane (20.5 mL) was stirred at 80 °C for 18 h. After addition of water (200 mL), the crude mixture was diluted with CHCl<sub>3</sub> (200 mL) and washed with brine. Purification with silica gel column chromatography afforded compound **5** in 86% yield (224 mg, 0.35 mmol). <sup>1</sup>H NMR (600



PF-AR NE3A at the KEK Photon Factory using a diffractometer equipped with a Dectris PILATUS 2M-F PAD detector. The collected diffraction data were processed with the CrysAlisPro software program.<sup>3</sup> The structures were solved by direct method using the SHELXT software program<sup>4</sup> and refined by full-matrix least-squares on  $F^2$  using the SHELX program suite<sup>5</sup> running on the Yadokari-XG 2009 software program.<sup>6</sup> In the refinements, [8]CPhen<sub>3,9</sub> molecules were restrained by SIMU and DFIX, pentane molecules were restrained by SIMU, DFIX and DANG, and *o*-DCB molecules were restrained by SIMU, DFIX, DANG, FLAT, ISOR and AFIX 66. The non-hydrogen atoms were analyzed anisotropically, and hydrogen atoms were input at calculated positions and refined with a riding model.

## Stereoisomers

Stereoisomers of [8]CPhen<sub>3,9</sub> were counted as follows. All the possible combinations of alternate *E/Z* and *R/S* linkages in the hoop were listed as shown in Table S1. The strings of the letters were examined, and the overlapping strings were removed from counting.

**Table S1.** Possible combinations of biaryl geometries for counting of [8]CPhen<sub>3,9</sub> stereoisomers<sup>a,b</sup>

|                        | <i>x,R,x,R,x,R,x,R</i>                                                                                            | <i>x,R,x,R,x,R,x,S</i>                                                                                            | <i>x,R,x,S,x,R,x,S</i>                                                                                            | <i>x,R,x,R,x,S,x,S</i>                                                                                           | <i>x,R,x,S,x,S,x,S</i>                                                                                            | <i>x,S,x,S,x,S,x,S</i>                                                                                            |
|------------------------|-------------------------------------------------------------------------------------------------------------------|-------------------------------------------------------------------------------------------------------------------|-------------------------------------------------------------------------------------------------------------------|------------------------------------------------------------------------------------------------------------------|-------------------------------------------------------------------------------------------------------------------|-------------------------------------------------------------------------------------------------------------------|
| <i>E,y,E,y,E,y,E,y</i> | <i>E,R,E,R,E,R,E,R*</i><br>( <i>E,R,E,R,E,R,E,R</i> )<br>( <i>E,R,E,R,E,R,E,R</i> )<br>( <i>E,R,E,R,E,R,E,R</i> ) | <i>E,R,E,R,E,R,E,S*</i><br>( <i>E,R,E,R,E,R,E,S</i> )<br>( <i>E,R,E,R,E,R,E,S</i> )<br>( <i>E,R,E,R,E,R,E,S</i> ) | <i>E,R,E,S,E,R,E,S</i><br>( <i>E,R,E,S,E,R,E,S</i> )<br>( <i>E,R,E,S,E,R,E,S</i> )<br>( <i>E,R,E,S,E,R,E,S</i> )  | <i>E,R,E,R,E,S,E,S</i><br>( <i>E,R,E,R,E,S,E,S</i> )<br>( <i>E,R,E,R,E,S,E,S</i> )<br>( <i>E,R,E,R,E,S,E,S</i> ) | <i>E,R,E,S,E,S,E,S*</i><br>( <i>E,R,E,S,E,S,E,S</i> )<br>( <i>E,R,E,S,E,S,E,S</i> )<br>( <i>E,R,E,S,E,S,E,S</i> ) | <i>E,S,E,S,E,S,E,S*</i><br>( <i>E,S,E,S,E,S,E,S</i> )<br>( <i>E,S,E,S,E,S,E,S</i> )<br>( <i>E,S,E,S,E,S,E,S</i> ) |
| <i>E,y,E,y,E,y,Z,y</i> | <i>E,R,E,R,E,R,Z,R*</i><br>( <i>E,R,E,R,Z,R,E,R</i> )<br>( <i>E,R,Z,R,E,R,E,R</i> )<br>( <i>Z,R,E,R,E,R,E,R</i> ) | <i>E,R,E,R,E,R,Z,S*</i><br>( <i>E,R,E,R,Z,R,E,S</i> )<br>( <i>E,R,Z,R,E,R,E,S</i> )<br>( <i>Z,R,E,R,E,R,E,S</i> ) | <i>E,R,E,S,E,R,Z,S</i><br>( <i>E,R,E,S,Z,R,E,S</i> )<br>( <i>E,R,Z,S,E,R,E,S</i> )<br>( <i>Z,R,E,S,E,R,E,S</i> )  | <i>E,R,E,R,E,S,Z,S*</i><br>( <i>E,R,E,R,Z,S,E,S</i> )<br>( <i>E,R,Z,R,E,S,S</i> )<br>( <i>Z,R,E,R,E,S,E,S</i> )  | <i>E,R,E,S,E,S,Z,S*</i><br>( <i>E,R,E,S,Z,S,E,S</i> )<br>( <i>E,R,Z,S,E,S,S</i> )<br>( <i>Z,R,E,S,E,S,E,S</i> )   | <i>E,S,E,S,E,S,Z,S*</i><br>( <i>E,S,E,S,Z,S,E,S</i> )<br>( <i>E,S,Z,S,E,S,S</i> )<br>( <i>Z,S,E,S,E,S,E,S</i> )   |
| <i>E,y,Z,y,E,y,Z,y</i> | <i>E,R,Z,R,E,R,Z,R*</i><br>( <i>Z,R,E,R,Z,R,E,R</i> )<br>( <i>E,R,Z,R,E,R,Z,R</i> )<br>( <i>Z,R,E,R,Z,R,E,R</i> ) | <i>E,R,Z,R,E,R,Z,S*</i><br>( <i>Z,R,E,R,Z,R,E,S</i> )<br>( <i>E,R,Z,R,E,R,Z,S</i> )<br>( <i>Z,R,E,R,Z,R,E,S</i> ) | <i>E,R,Z,S,E,R,Z,S</i><br>( <i>Z,R,E,S,Z,R,E,S</i> )<br>( <i>E,R,Z,S,E,R,Z,S</i> )<br>( <i>Z,R,E,S,Z,R,E,S</i> )  | <i>E,R,Z,R,E,S,Z,S</i><br>( <i>Z,R,E,R,Z,S,E,S</i> )<br>( <i>E,R,Z,R,E,S,Z,S</i> )<br>( <i>Z,R,E,R,Z,S,E,S</i> ) | <i>E,R,Z,S,E,S,Z,S*</i><br>( <i>Z,R,E,S,Z,S,E,S</i> )<br>( <i>E,R,Z,S,E,S,Z,S</i> )<br>( <i>Z,R,E,S,Z,S,E,S</i> ) | <i>E,S,Z,S,E,S,Z,S*</i><br>( <i>Z,S,E,S,Z,S,E,S</i> )<br>( <i>E,S,Z,S,E,S,Z,S</i> )<br>( <i>Z,S,E,S,Z,S,E,S</i> ) |
| <i>E,y,E,y,Z,y,Z,y</i> | <i>E,R,E,R,Z,R,Z,R*</i><br>( <i>E,R,Z,R,Z,R,E,R</i> )<br>( <i>Z,R,Z,R,E,R,E,R</i> )<br>( <i>Z,R,E,R,Z,R,Z,R</i> ) | <i>E,R,E,R,Z,R,Z,S*</i><br>( <i>E,R,Z,R,Z,R,E,S</i> )<br>( <i>Z,R,Z,R,E,R,E,S</i> )<br>( <i>Z,R,E,R,Z,R,Z,S</i> ) | <i>E,R,E,S,Z,R,Z,S*</i><br>( <i>E,R,Z,S,Z,R,E,S</i> )<br>( <i>Z,R,Z,S,E,R,E,S</i> )<br>( <i>Z,R,E,S,Z,R,Z,S</i> ) | <i>E,R,E,R,Z,S,S*</i><br>( <i>E,R,Z,R,Z,S,E,S</i> )<br>( <i>Z,R,Z,R,E,S,E,S</i> )<br>( <i>Z,R,E,R,E,S,Z,S</i> )  | <i>E,R,E,S,Z,S,Z,S*</i><br>( <i>E,R,Z,S,Z,S,E,S</i> )<br>( <i>Z,R,Z,S,E,S,E,S</i> )<br>( <i>Z,R,E,S,Z,S,Z,S</i> ) | <i>E,S,E,S,Z,S,Z,S*</i><br>( <i>E,S,Z,S,Z,S,E,S</i> )<br>( <i>Z,S,Z,S,E,S,E,S</i> )<br>( <i>Z,S,E,S,Z,S,Z,S</i> ) |
| <i>E,y,Z,y,Z,y,Z,y</i> | <i>E,R,Z,R,Z,R,Z,R*</i><br>( <i>Z,R,Z,R,Z,R,E,R</i> )<br>( <i>Z,R,Z,R,E,R,Z,R</i> )<br>( <i>Z,R,E,R,Z,R,Z,R</i> ) | <i>E,R,Z,R,Z,R,Z,S*</i><br>( <i>Z,R,Z,R,Z,R,E,S</i> )<br>( <i>Z,R,Z,R,E,R,Z,S</i> )<br>( <i>Z,R,E,R,Z,R,Z,S</i> ) | <i>E,R,Z,S,Z,R,Z,S</i><br>( <i>Z,R,Z,S,Z,R,E,S</i> )<br>( <i>Z,R,Z,S,E,R,Z,S</i> )<br>( <i>Z,R,E,S,Z,R,Z,S</i> )  | <i>E,R,Z,R,Z,S,Z,S</i><br>( <i>Z,R,Z,R,Z,S,E,S</i> )<br>( <i>Z,R,Z,R,E,S,Z,S</i> )<br>( <i>Z,R,E,R,Z,S,Z,S</i> ) | <i>E,R,Z,S,Z,S,Z,S*</i><br>( <i>Z,R,Z,S,Z,S,E,S</i> )<br>( <i>Z,R,Z,S,E,S,Z,S</i> )<br>( <i>Z,R,E,S,Z,S,Z,S</i> ) | <i>E,S,Z,S,Z,S,Z,S*</i><br>( <i>Z,S,Z,S,Z,S,E,S</i> )<br>( <i>Z,S,Z,S,E,S,Z,S</i> )<br>( <i>Z,S,E,S,Z,S,Z,S</i> ) |
| <i>Z,y,Z,y,Z,y,Z,y</i> | <i>Z,R,Z,R,Z,R,Z,R*</i><br>( <i>Z,R,Z,R,Z,R,Z,R</i> )<br>( <i>Z,R,Z,R,Z,R,Z,R</i> )<br>( <i>Z,R,Z,R,Z,R,Z,R</i> ) | <i>Z,R,Z,R,Z,R,Z,S*</i><br>( <i>Z,R,Z,R,Z,R,Z,S</i> )<br>( <i>Z,R,Z,R,Z,R,Z,S</i> )<br>( <i>Z,R,Z,R,Z,R,Z,S</i> ) | <i>Z,R,Z,S,Z,R,Z,S</i><br>( <i>Z,R,Z,S,Z,R,Z,S</i> )<br>( <i>Z,R,Z,S,Z,R,Z,S</i> )<br>( <i>Z,R,Z,S,Z,R,Z,S</i> )  | <i>Z,R,Z,R,Z,S,Z,S</i><br>( <i>Z,R,Z,R,Z,S,Z,S</i> )<br>( <i>Z,R,Z,R,Z,S,Z,S</i> )<br>( <i>Z,R,Z,R,Z,S,Z,S</i> ) | <i>Z,R,Z,S,Z,S,Z,S*</i><br>( <i>Z,R,Z,S,Z,S,Z,S</i> )<br>( <i>Z,R,Z,S,Z,S,Z,S</i> )<br>( <i>Z,R,Z,S,Z,S,Z,S</i> ) | <i>Z,S,Z,S,Z,S,Z,S*</i><br>( <i>Z,S,Z,S,Z,S,Z,S</i> )<br>( <i>Z,S,Z,S,Z,S,Z,S</i> )<br>( <i>Z,S,Z,S,Z,S,Z,S</i> ) |

*a.* Combinations in a parenthesis ( ) indicate the presence of an identical geometry in the same frame and should be removed from the count. *b.* Combinations with an asterisk \* indicate the presence of enantiomeric pair.

(3) CrysAlisPro 1.171.38.43, Rigaku OD, 2015.

(4) Sheldrick, G. M. Crystal structure refinement with SHELXL. *Acta Crystallogr. A* 2015, 71, 3-8.

(5) Sheldrick, G. M. A short history of SHELX. *Acta Crystallogr. A* 2008, 64, 112-122.

(6) Kabuto, C.; Akine, S.; Nemoto, T.; Kwon, E. Release of software (Yadokari-XG 2009) for crystal structure analyses. *J. Cryst. Soc. Jpn.* 2009, 51, 218-224.

## Theoretical calculations

The Gaussian 09 program suite was used.<sup>7</sup> Calculations were performed either at the semiempirical PM6 method<sup>8</sup> or at the DFT method using the B3LYP functional, the gradient correction of the exchange functional by Becke<sup>9,10</sup> and the correlation functional by Lee, Yang and Parr.<sup>11</sup> The 6-31G(d,p) split valence plus polarization basis set was used.<sup>12,13,14,15,16</sup> Analysis of rotational barriers for binaphthyl was performed by a relaxed potential energy surface scan method. Spectra calculations were performed by time-dependent DFT (TD DFT) for the first 30 singlet-singlet transitions with an additional keyword of IOP(9/40=2) to output information on smaller contributions to each electronic transition. Note that, although the spectral analysis with the B3LYP functional yields an excellent consistence in the ordering of states with the experimental results, it tends to underestimate the excitation energy to afford slightly red-shifted theoretical spectra.<sup>17</sup>

## NMR analyses

### Assignments of <sup>1</sup>H resonances of [8]CPhen<sub>3,9</sub>

Three singlets (H<sup>4</sup>/H<sup>5</sup>/H<sup>10</sup>) and four doublets (H<sup>8</sup>/H<sup>7</sup>/H<sup>2</sup>/H<sup>1</sup>) were assigned as follows. NOE correlations with a methyl resonance in a NOESY spectrum established the H<sup>5</sup> (singlet) and H<sup>7</sup> (doublet) resonances (Fig. S1). A NOE correlation with the H<sup>5</sup> resonance located the H<sup>4</sup> (singlet)

- 
- (7) Frisch, M. J.; Trucks, G. W.; Schlegel, H. B.; Scuseria, G. E.; Robb, M. A.; Cheeseman, J. R.; Scalmani, G.; Barone, V.; Mennucci, B.; Petersson, G. A.; Nakatsuji, H.; Caricato, M.; Li, X.; Hratchian, H. P.; Izmaylov, A. F.; Bloino, J.; Zheng, G.; Sonnenberg, J. L.; Hada, M.; Ehara, M.; Toyota, K.; Fukuda, R.; Hasegawa, J.; Ishida, M.; Nakajima, T.; Honda, Y.; Kitao, O.; Nakai, H.; Vreven, T.; Montgomery, J. A.; Peralta, J. E., Jr.; Ogliaro, F.; Bearpark, M.; Heyd, J. J.; Brothers, E.; Kudin, K. N.; Staroverov, V. N.; Keith, T.; Kobayashi, R.; Normand, J.; Raghavachari, K.; Rendell, A.; Burant, J. C.; Iyengar, S. S.; Tomasi, J.; Cossi, M.; Rega, N.; Millam, J. M.; Klene, M.; Knox, J. E.; Cross, J. B.; Bakken, V.; Adamo, C.; Jaramillo, J.; Gomperts, R.; Stratmann, R. E.; Yazyev, O.; Austin, A. J.; Cammi, R.; Pomelli, C.; Ochterski, J. W.; Martin, R. L.; Morokuma, K.; Zakrzewski, V. G.; Voth, G. A.; Salvador, P.; Dannenberg, J. J.; Dapprich, S.; Daniels, A. D.; Farkas, O.; Foresman, J. B.; Ortiz, J. V.; Cioslowski, J.; Fox, D. J. Gaussian 09 (Revision B.01); Gaussian, Inc.: Wallingford, CT, 2010.
- (8) Stewart, J. J. P. Optimization of parameters for semiempirical methods V: Modification of NDDO approximations and application to 70 elements. *J. Mol. Model.* **2007**, *13*, 1173-1213.
- (9) Beck, A. D. Density-functional exchange-energy approximation with correct asymptotic behavior. *Phys. Rev. A* **1988**, *38*, 3098-3100.
- (10) Becke, A. D. Density-functional thermochemistry. III. The role of exact exchange. *J. Chem. Phys.* **1993**, *98*, 5648-5652.
- (11) Lee, C.; Yang, W.; Parr, R. G. Development of the Colle-Salvetti correlation-energy formula into a functional of the electron density. *Phys. Rev. B* **1988**, *37*, 785-789.
- (12) Ditchfield, R.; Hehre, W. J.; Pople, J. A. Self-consistent molecularorbital methods. IX. An extended Gaussian-type basis for molecular-orbital studies of organic molecules. *J. Chem. Phys.* **1971**, *54*, 724-728.
- (13) Hehre, W. J.; Ditchfield, R.; Pople, J. A. Self-consistent molecular orbital methods. XII. Further extensions of Gaussian-type basis sets for use in molecular orbital studies of organic molecules. *J. Chem. Phys.* **1972**, *56*, 2257-2261.
- (14) Hariharan, P. C.; Pople, J. A. Accuracy of AH<sub>n</sub> equilibrium geometries by single determinant molecular orbital theory. *Mol. Phys.* **1974**, *27*, 209-214.
- (15) Gordon, M. S. The isomers of silacyclopropane. *Chem. Phys. Lett.* **1980**, *76*, 163-168.
- (16) Hariharan, P. C.; Pople, J. A. The influence of polarization functions on molecular orbital hydrogenation energies. *Theor. Chem. Acc.* **1973**, *28*, 213-222.
- (17) Bauernschmitt, R.; Ahlrichs, R. Treatment of electronic excitations within the adiabatic approximation of time dependent density functional theory. *Chem. Phys. Lett.* **1996**, *256*, 454-464.

resonance. One remaining singlet was thus assigned as a  $H^{10}$  (singlet) resonance. A coupling correlation with the  $H^7$  resonance allowed the assignment of the  $H^8$  (doublet) resonance (Fig. S2). Thus, two remaining doublets originated from  $H^2$  and  $H^1$  resonances, and the NOE correlation with the  $H^4$  resonance established the  $H^2$  resonance at the *E*-biaryl linkage.

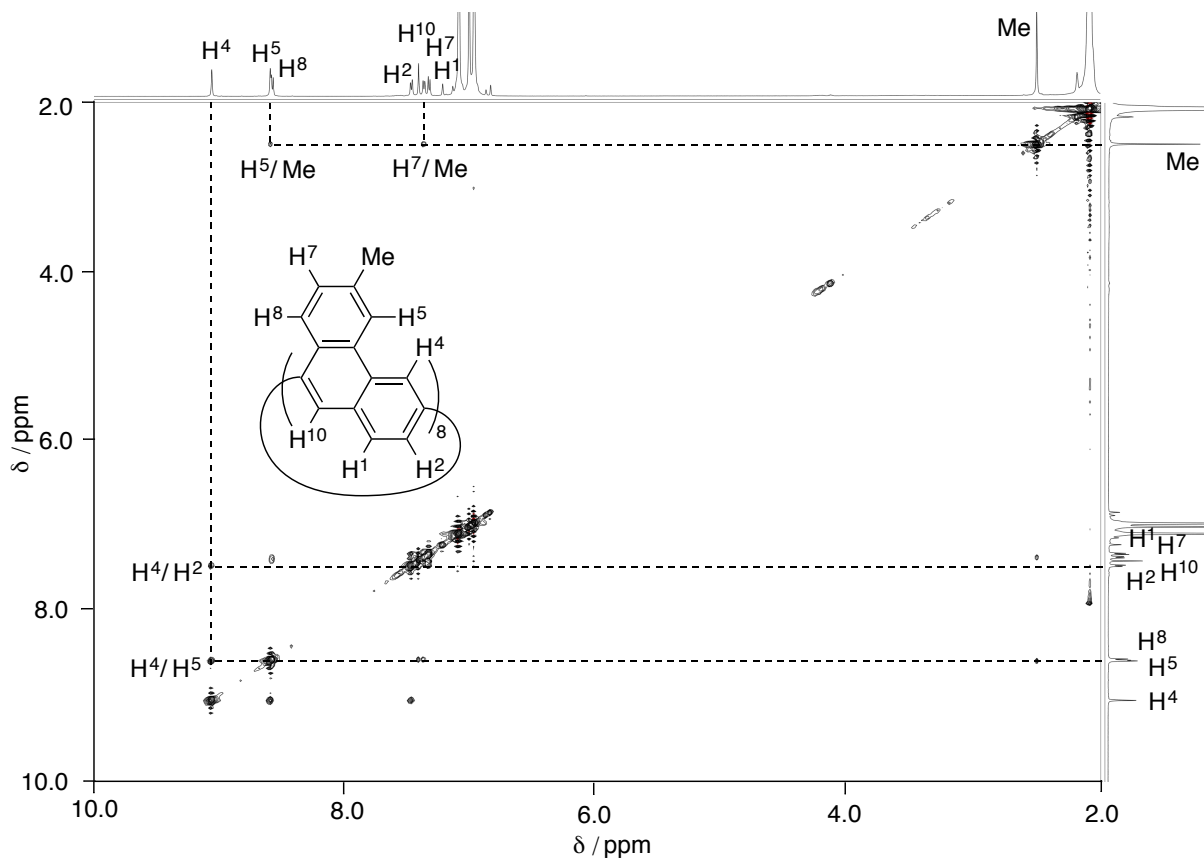

**Fig. S1.** NOESY spectrum of [8]CPhen<sub>3,9</sub> in toluene-*d*<sub>8</sub> (25 °C, 600 MHz).



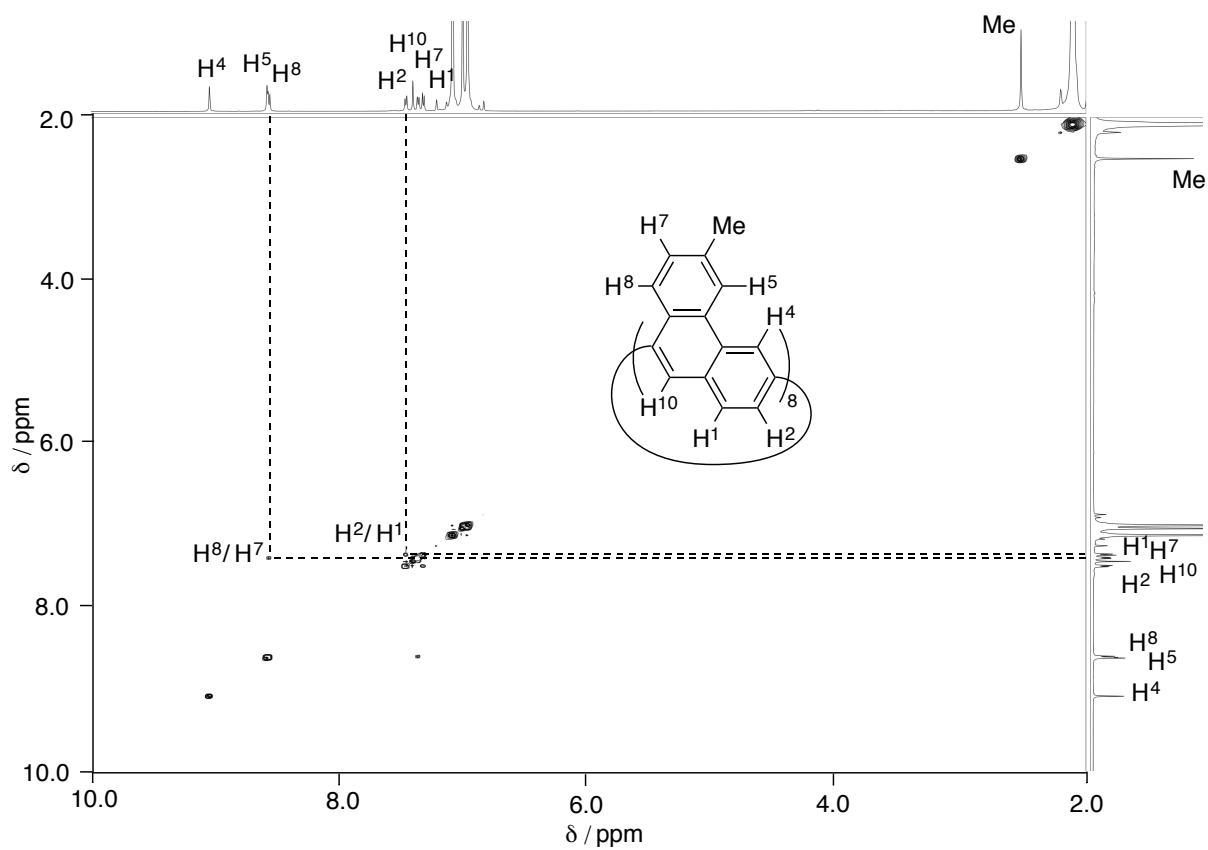

**Fig. S2.** COSY spectrum of [8]CPhen<sub>3,9</sub> in toluene-*d*<sub>8</sub> (25 °C, 600 MHz).

## VT NMR analyses

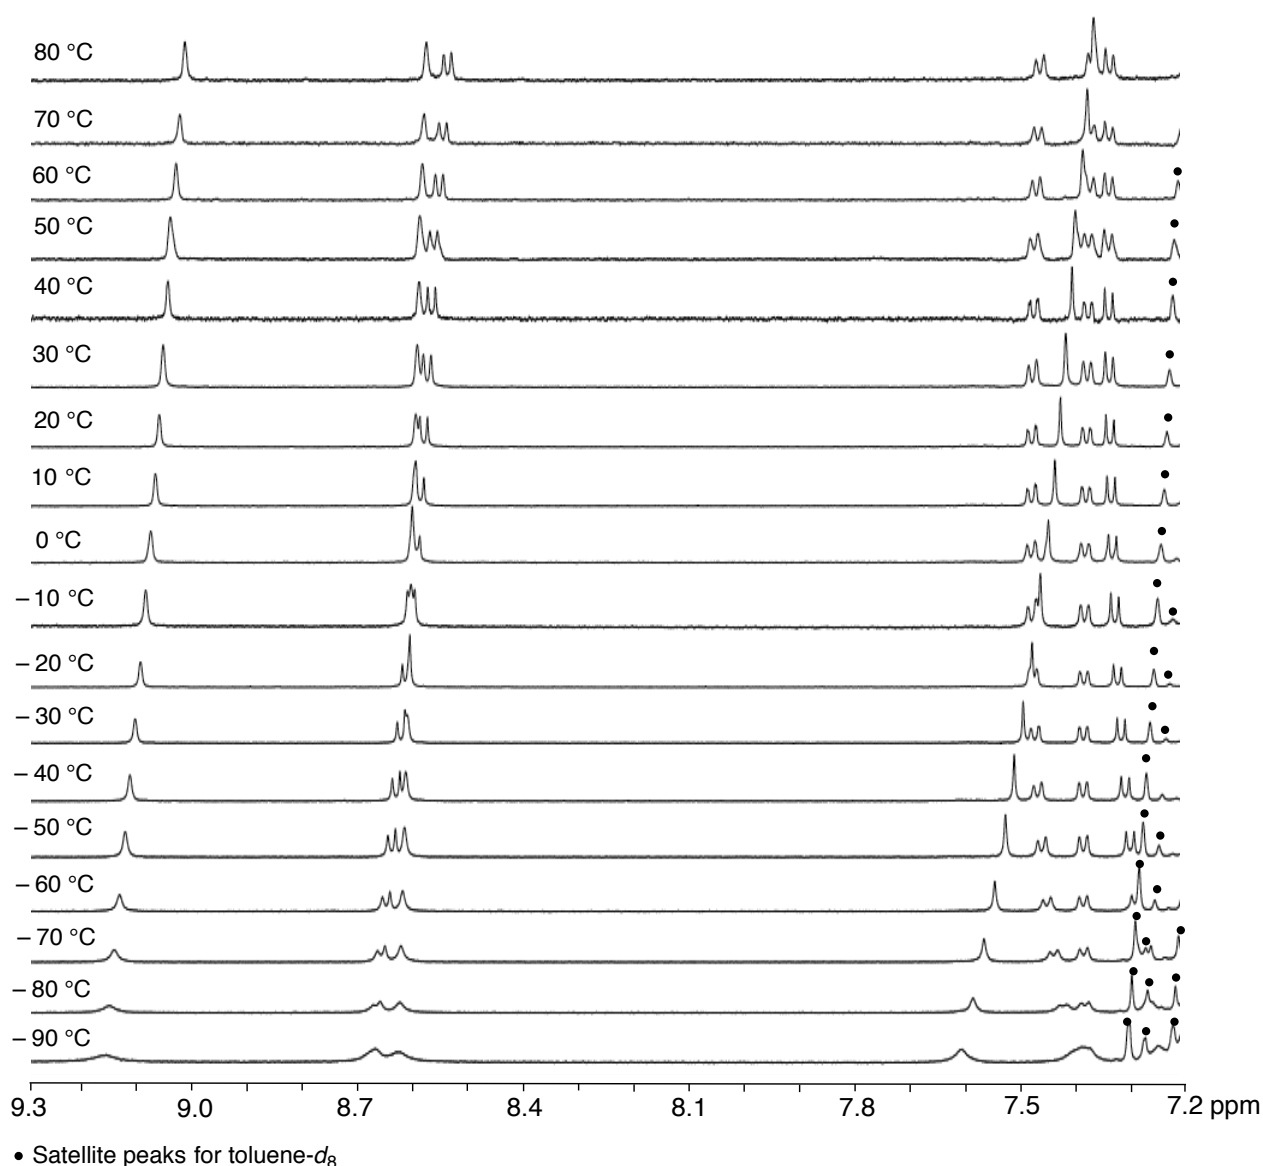

**Fig. S3.** VT-NMR analysis of [8]CPhen<sub>3,9</sub> in toluene-*d*<sub>8</sub> (600 MHz). Black dots show the satellite resonances of toluene.

### Separation of enantiomers

Enantiomers of [8]CPhen<sub>3,9</sub> were separated on a recycling, preparative scale HPLC (Fig. S4). The compound was slowly oxidized in solution, and the specimen for the present chromatogram contained oxidized compounds ( $m/z = 1552$ : [8]CPhen<sub>3,9</sub>+2O). After the separation, analytical HPLC was performed to confirm the separation (Fig. S5).

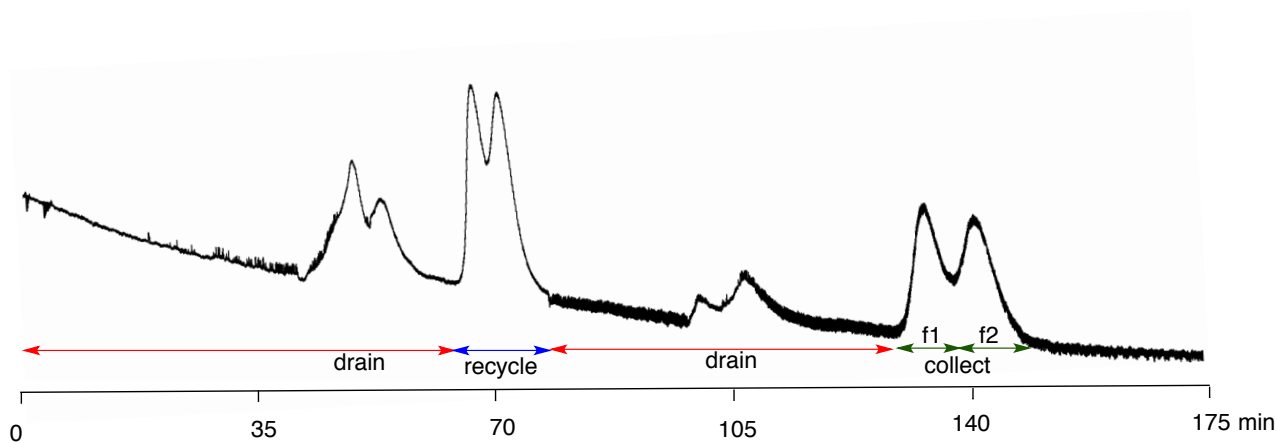

**Fig. S4.** Separation of enantiomers of [8]CPhen<sub>3,9</sub>. Column = COSMOSIL Cholester (50 $\phi$ , 250+250 mm), eluent = 30% MeOH/CHCl<sub>3</sub>, flow rate = 14.0 mL/min, detector = UV-vis (280 nm).

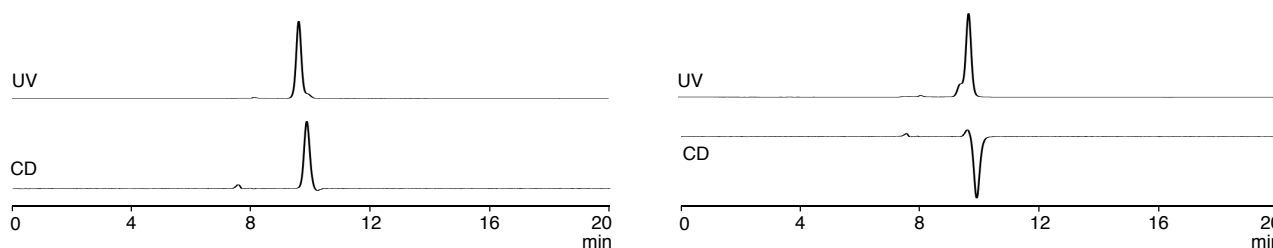

**Fig. S5.** Analysis of separated enantiomers of [8]CPhen<sub>3,9</sub>. Column = COSMOSIL Cholester (4.6 $\phi$ , 250+250+250 mm), eluent = 30% MeOH/CHCl<sub>3</sub>, flow rate = 1.0 mL/min, detector = UV-vis (280 nm) and CD (379 nm), temperature = 40 °C.

## VT CD analyses

### VT CD analyses of (-)-4

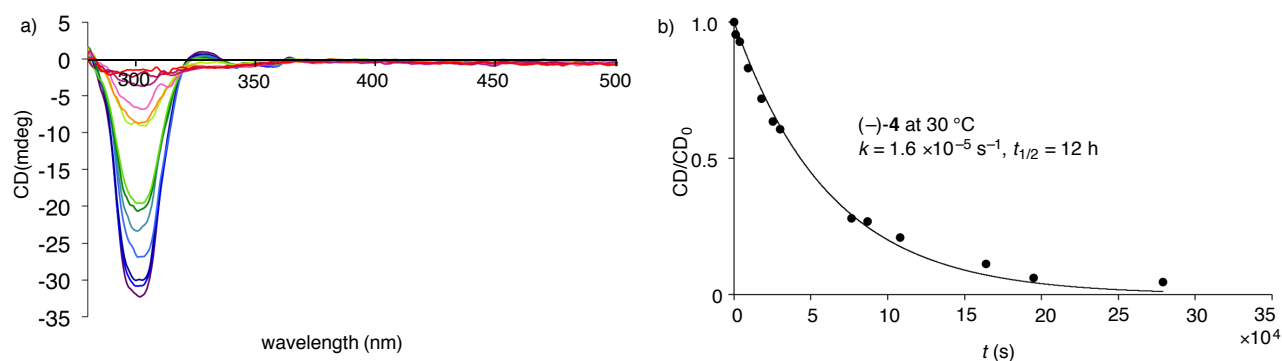

**Fig. S6.** Racemization kinetics of (-)-4 at 30 °C. (a) VT CD spectra. (b) Decay of the CD signal at 302 nm. The coefficient of determination ( $R^2$ ) was 0.994199021 and confirmed the sufficient goodness of fit for the analysis.

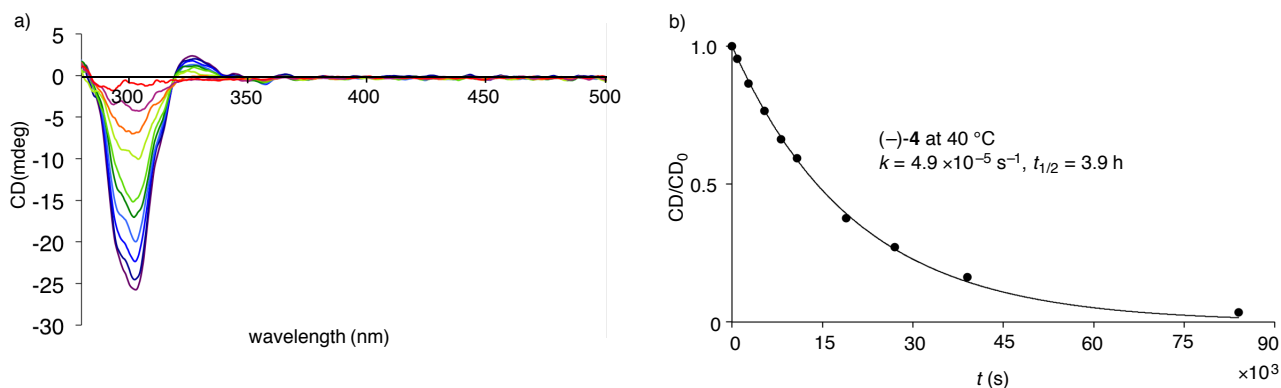

**Fig. S7.** Racemization kinetics of (-)-4 at 40 °C. (a) VT CD spectra. (b) Decay of the CD signal at 302 nm. The coefficient of determination ( $R^2$ ) was 0.998794998 and confirmed the sufficient goodness of fit for the analysis.

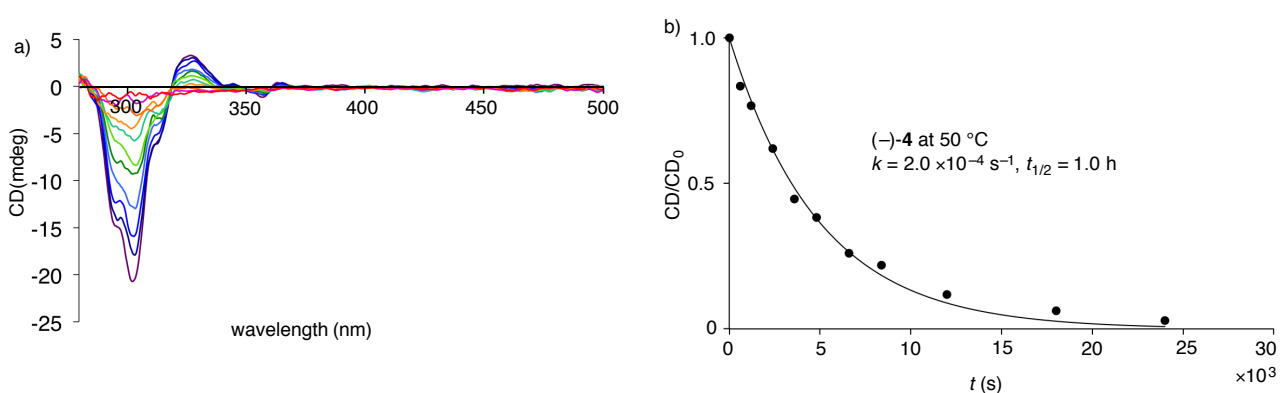

**Fig. S8.** Racemization kinetics of (-)-4 at 50 °C. (a) VT CD spectra. (b) Decay of the CD signal at 302 nm. The coefficient of determination ( $R^2$ ) was 0.99263868 and confirmed the sufficient goodness of fit for the analysis.

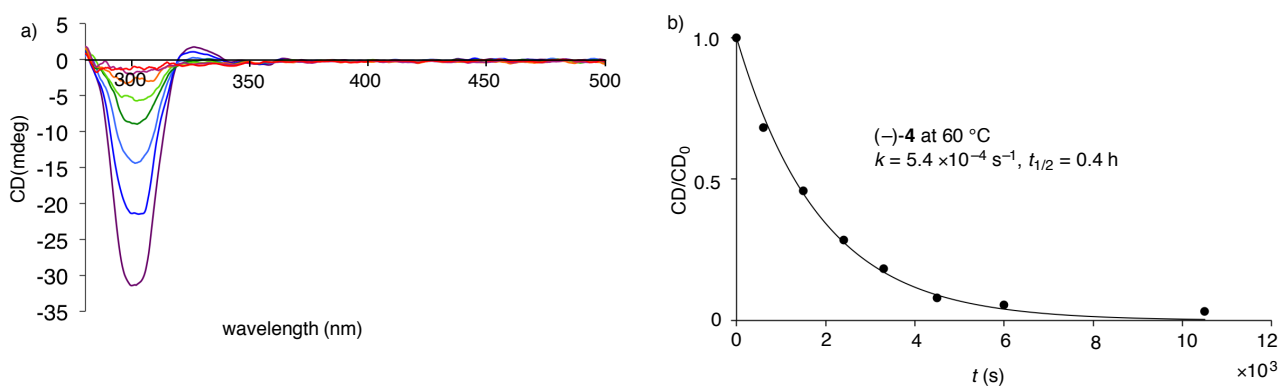

**Fig. S9.** Racemization kinetics of (-)-4 at 60 °C. (a) VT CD spectra. (b) Decay of the CD signal at 302 nm. The coefficient of determination ( $R^2$ ) was 0.99605121 and confirmed the sufficient goodness of fit for the analysis.

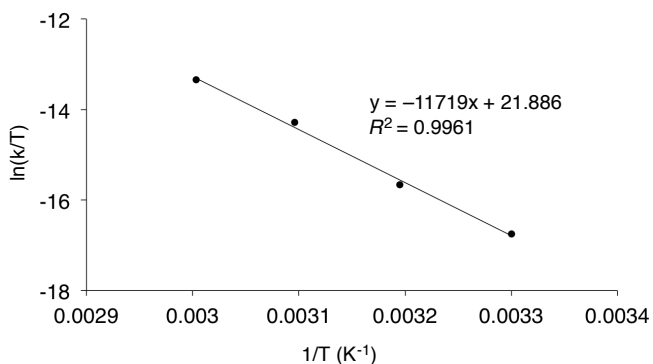

**Fig. S10.** Eyring plot for racemization of (-)-4 to reveal the activation energy with  $\Delta H^\ddagger = +23$  kcal/mol,  $\Delta S^\ddagger = -3.7$  cal/mol $\cdot$ K and  $\Delta G^\ddagger = +24$  kcal/mol at 25 °C.

VT CD analyses of (*E,S,E,S,E,S,E,S*)-[8]CPhen<sub>3,9</sub>

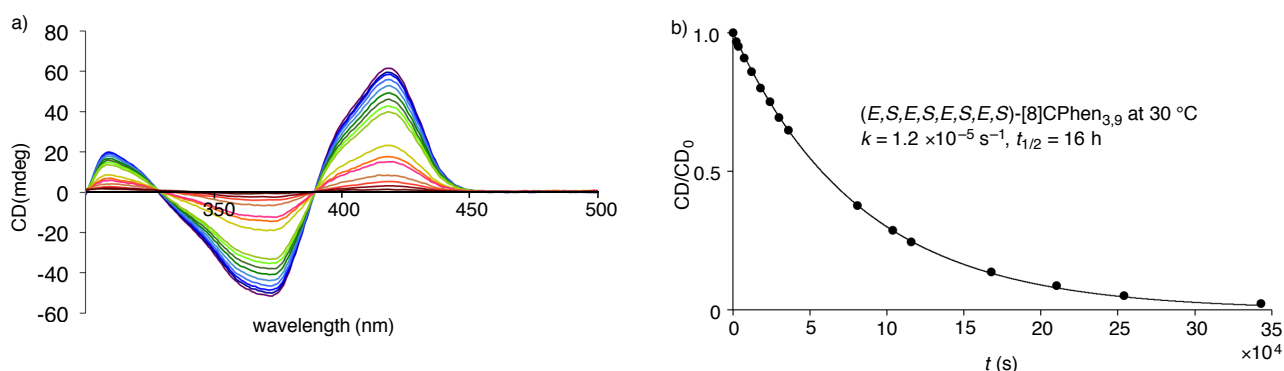

**Fig. S11.** Racemization kinetics of (*E,S,E,S,E,S,E,S*)-[8]CPhen<sub>3,9</sub> at 30 °C. (a) VT CD spectra. (b) Decay of the CD signal at 419 nm. The coefficient of determination ( $R^2$ ) was 0.999784569 and confirmed the sufficient goodness of fit for the analysis.

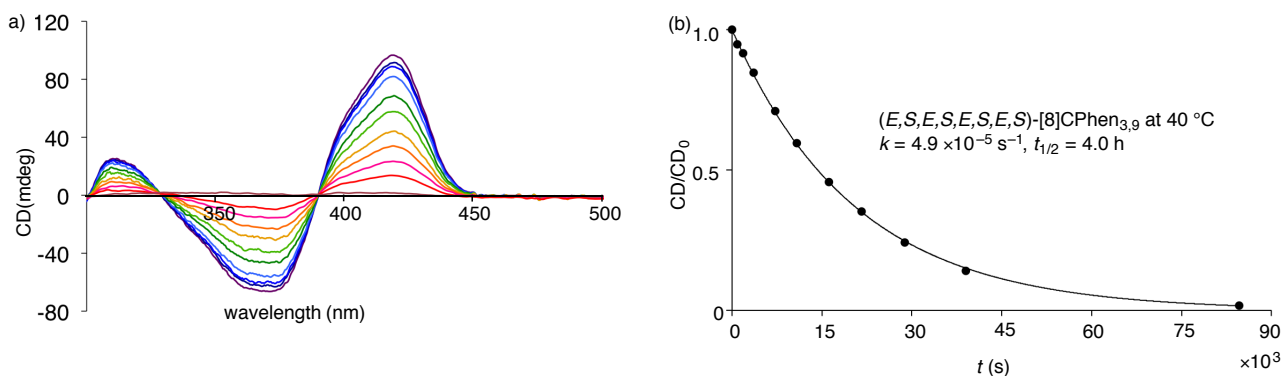

**Fig. S12.** Racemization kinetics of (*E,S,E,S,E,S,E,S*)-[8]CPhen<sub>3,9</sub> at 40 °C. (a) VT CD spectra. (b) Decay of the CD signal at 419 nm. The coefficient of determination ( $R^2$ ) was 0.99971099 and confirmed the sufficient goodness of fit for the analysis.

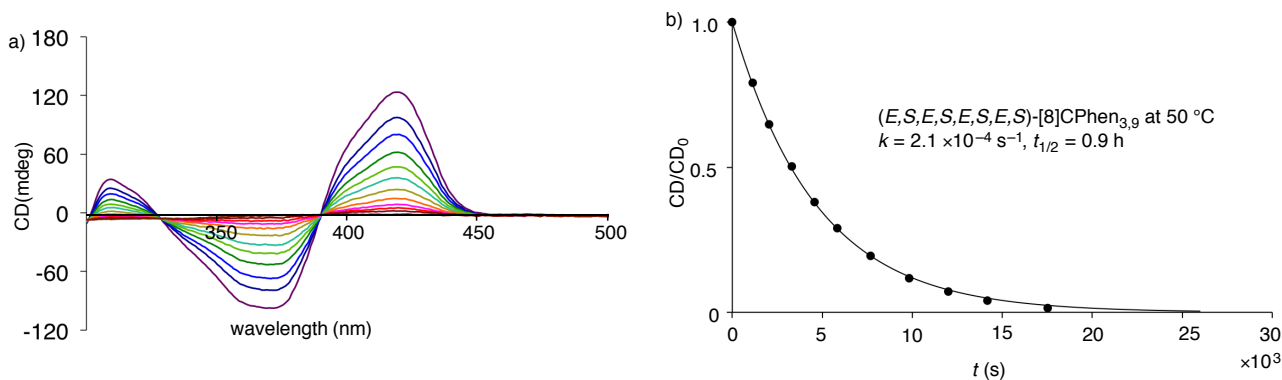

**Fig. S13.** Racemization kinetics of  $(E,S,E,S,E,S,E,S)$ -[8]CPhen<sub>3,9</sub> at 50 °C. (a) VT CD spectra. (b) Decay of the CD signal at 419 nm. The coefficient of determination ( $R^2$ ) was 0.999539945 and confirmed the sufficient goodness of fit for the analysis.

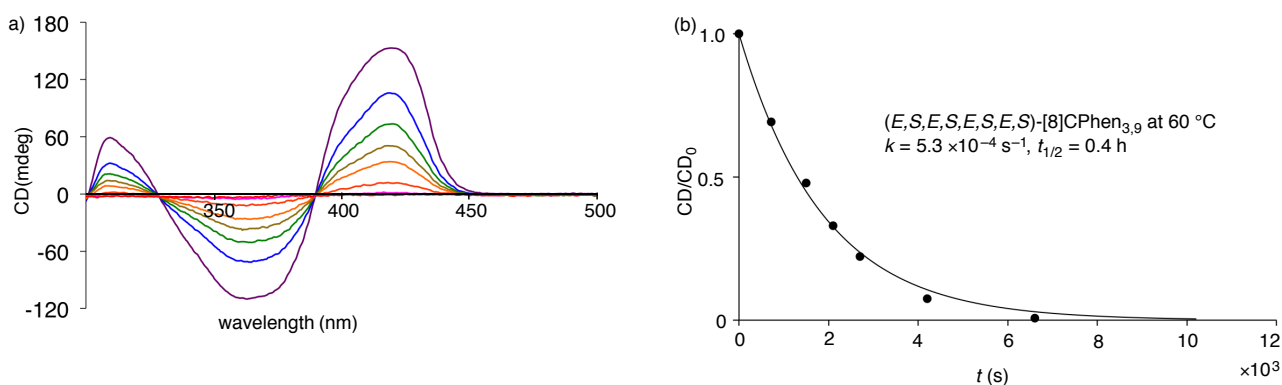

**Fig. S14.** Racemization kinetics of  $(E,S,E,S,E,S,E,S)$ -[8]CPhen<sub>3,9</sub> at 60 °C. (a) VT CD spectra. (b) Decay of the CD signal at 419 nm. The coefficient of determination ( $R^2$ ) was 0.996916068 and confirmed the sufficient goodness of fit for the analysis.

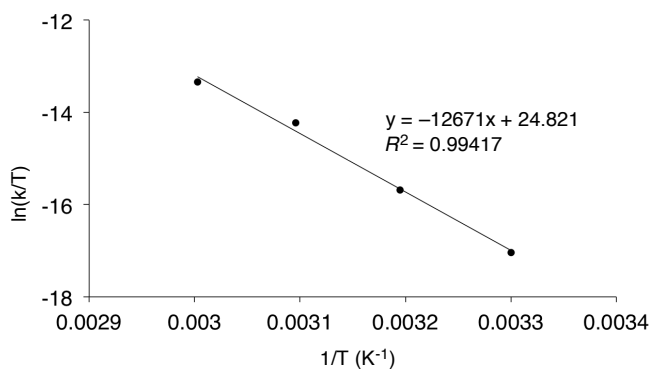

**Fig. S15.** Eyring plot for racemization of  $(E,S,E,S,E,S,E,S)$ -[8]CPhen<sub>3,9</sub> to reveal the activation energy with  $\Delta H^\ddagger = +25$  kcal/mol,  $\Delta S^\ddagger = +2.1$  cal/mol·K and  $\Delta G^\ddagger = +24$  kcal/mol at 25 °C.

### Isomerization profile

As shown in a scheme below, there appears two  $E/Z$ -paths for the conversion from  $(E,y^1,E,y^2,E,y^3,E,y^4)$ -isomer to  $(Z,y^1,Z,y^2,Z,y^3,Z,y^4)$ -isomer under the condition of single-linkage

rotation. One path (top path) is shown in Fig. 9, and the other (bottom path) is shown in Fig. S16.

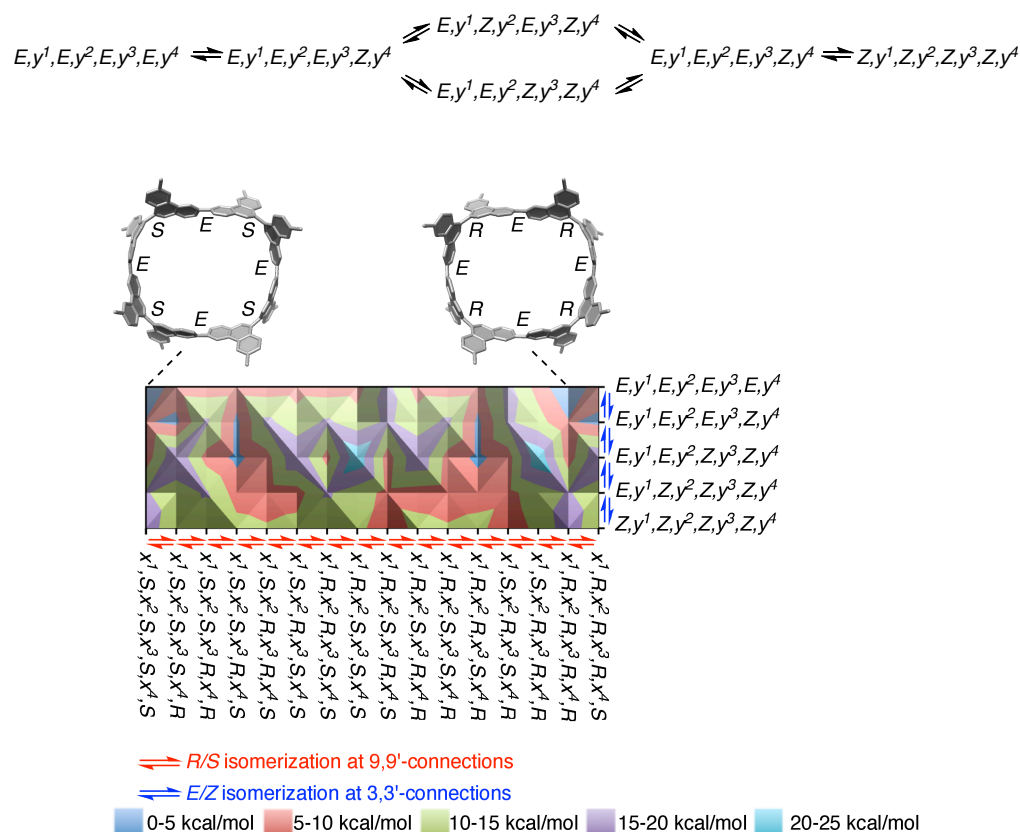

**Fig. S16.** Isomerization profile of [8]CPhen<sub>3,9</sub>. Adjacent isomers are interconvertible through a single-linkage rotation. All the stereoisomers expect for ( $E,y^1,Z,y^2,E,y^3,Z,y^4$ )-isomers are mapped. See Fig. 9 for a profile involving ( $E,y^1,Z,y^2,E,y^3,Z,y^4$ )-isomers.

## Supplementary data

### HPLC chromatogram

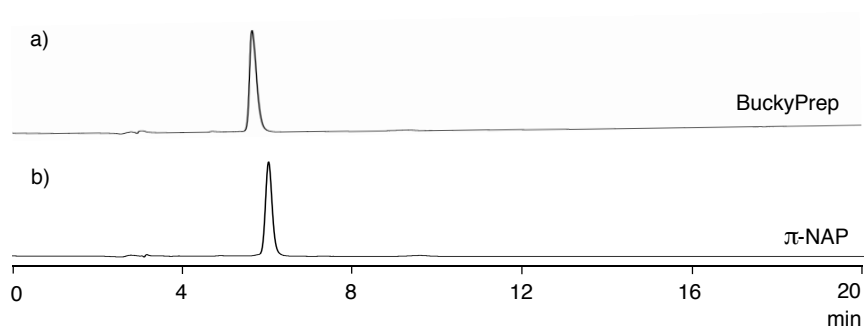

**Fig. S17.** Chromatogram confirming the purity of [8]CPhen<sub>3,9</sub>. (a) Column = COSMOSIL BuckyPrep (4.6φ, 250 mm), eluent = 70% CHCl<sub>3</sub>/MeOH, flow rate = 1.0 mL/min, detector = UV-vis (280 nm), temperature = 40 °C. (b) Column = COSMOSIL π-NAP (4.6φ, 250 mm), eluent = 60% CHCl<sub>3</sub>/MeOH, flow rate = 1.0 mL/min, detector = UV-vis (280 nm), temperature = 40 °C.

## NMR spectra

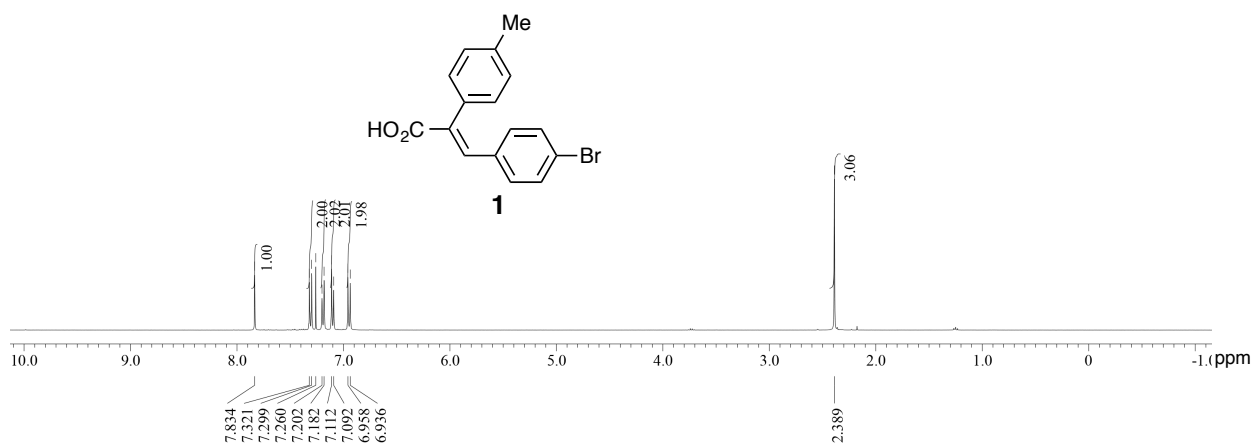

**Fig. S18.** <sup>1</sup>H NMR spectrum of **1** in CDCl<sub>3</sub> (25 °C, 600 MHz)

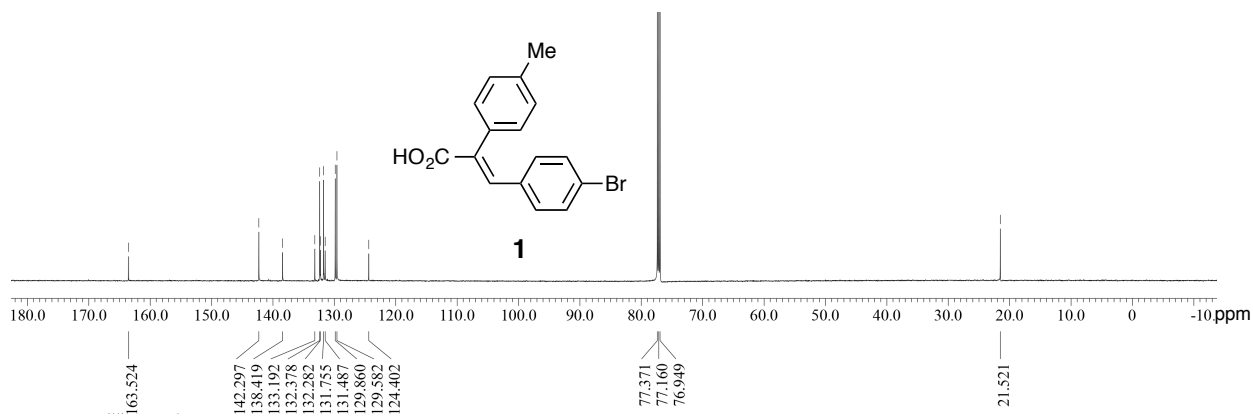

**Fig. S19.** <sup>13</sup>C NMR spectrum of **1** in CDCl<sub>3</sub> (25 °C, 150 MHz)

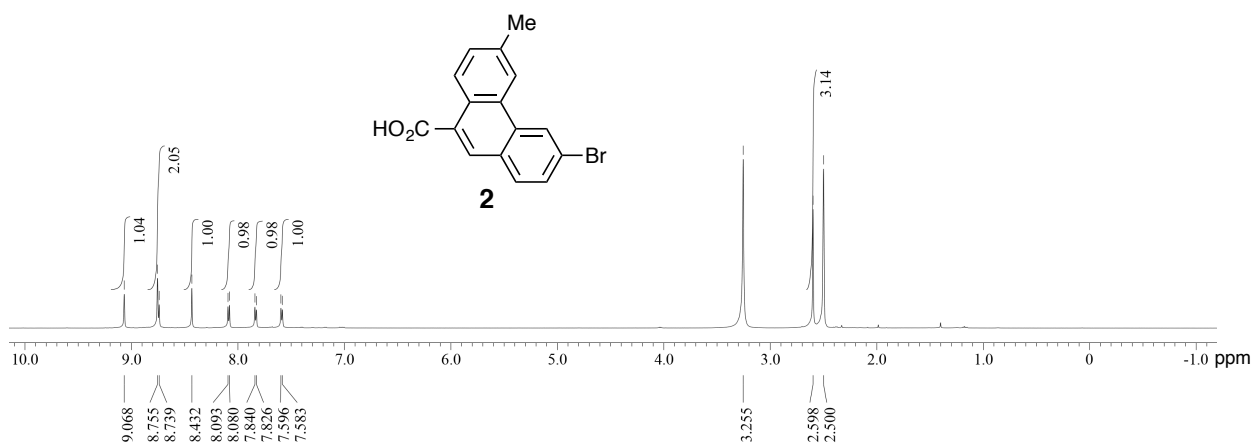

**Fig. S20.** <sup>1</sup>H NMR spectrum of **2** in DMSO-*d*<sub>6</sub> (25 °C, 600 MHz)



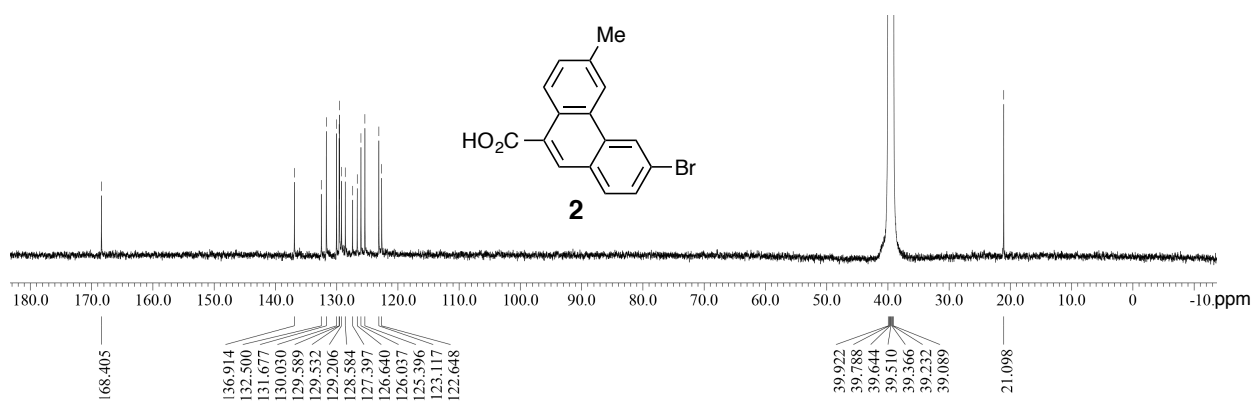

Fig. S21. <sup>13</sup>C NMR spectrum of **2** in DMSO-*d*<sub>6</sub> (25 °C, 150 MHz)

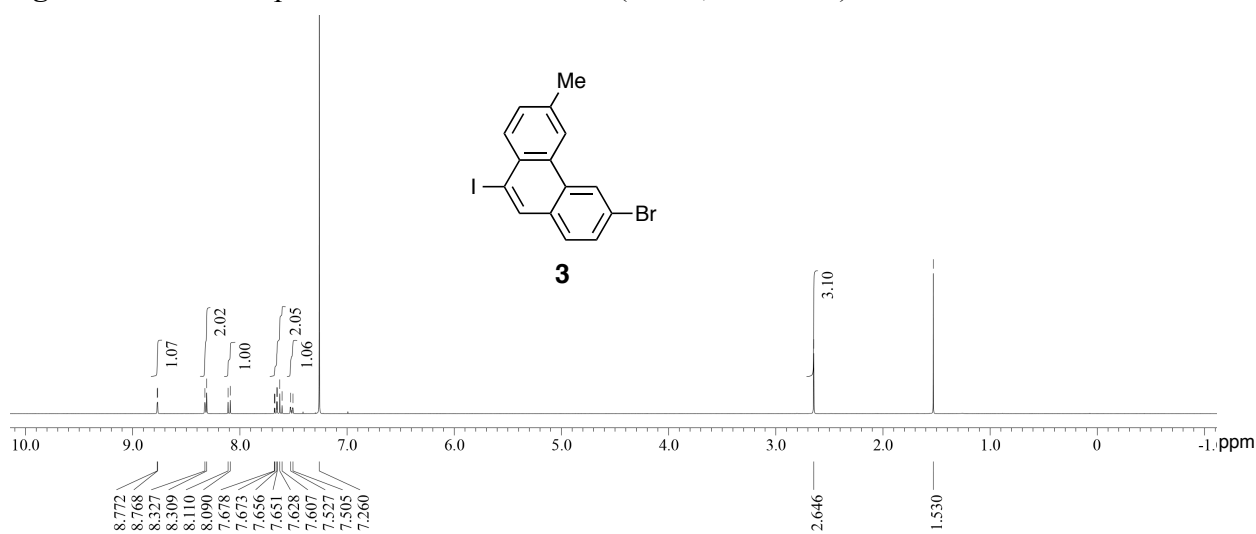

Fig. S22. <sup>1</sup>H NMR spectrum of **3** in CDCl<sub>3</sub> (25 °C, 600 MHz)

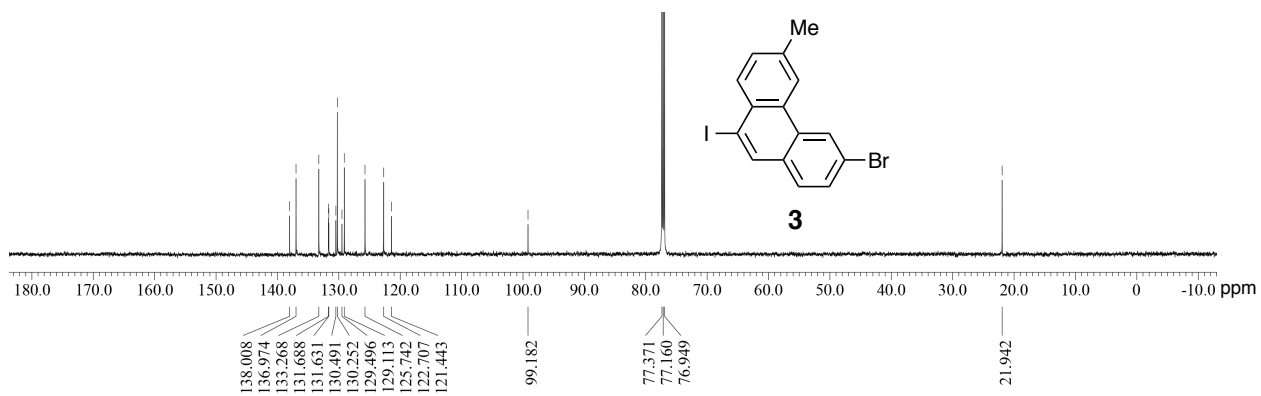

Fig. S23. <sup>13</sup>C NMR spectrum of **3** in CDCl<sub>3</sub> (25 °C, 150 MHz)

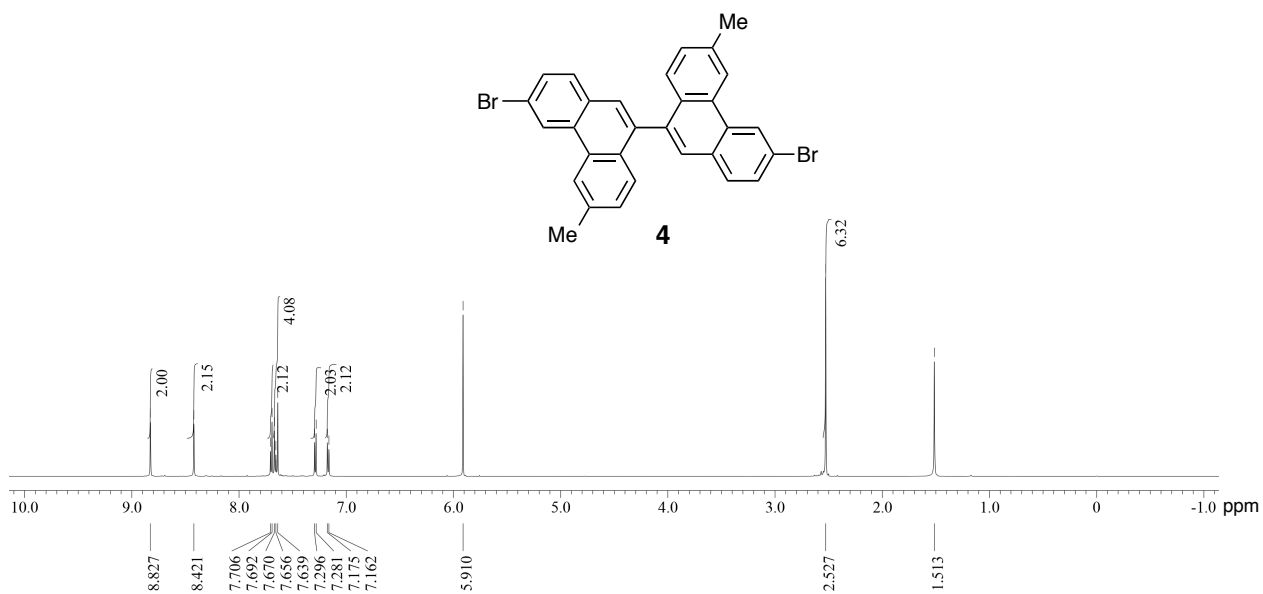

**Fig. S24.** <sup>1</sup>H NMR spectrum of **4** in C<sub>2</sub>D<sub>2</sub>Cl<sub>4</sub> (25 °C, 600 MHz)

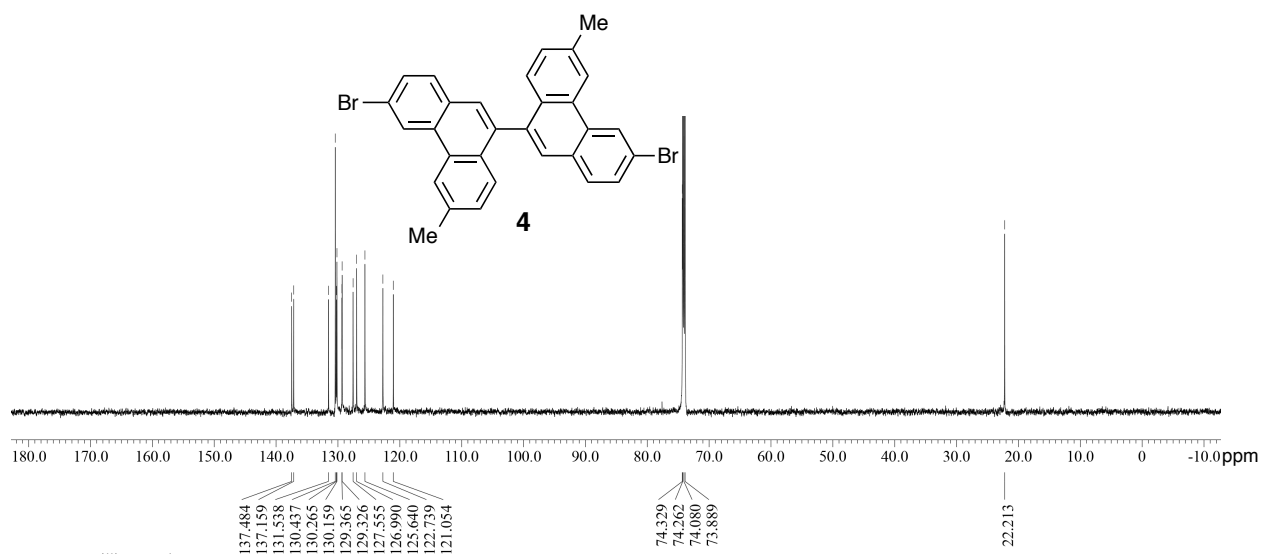

**Fig. S25.** <sup>13</sup>C NMR spectrum of **4** in C<sub>2</sub>D<sub>2</sub>Cl<sub>4</sub> (25 °C, 150 MHz)

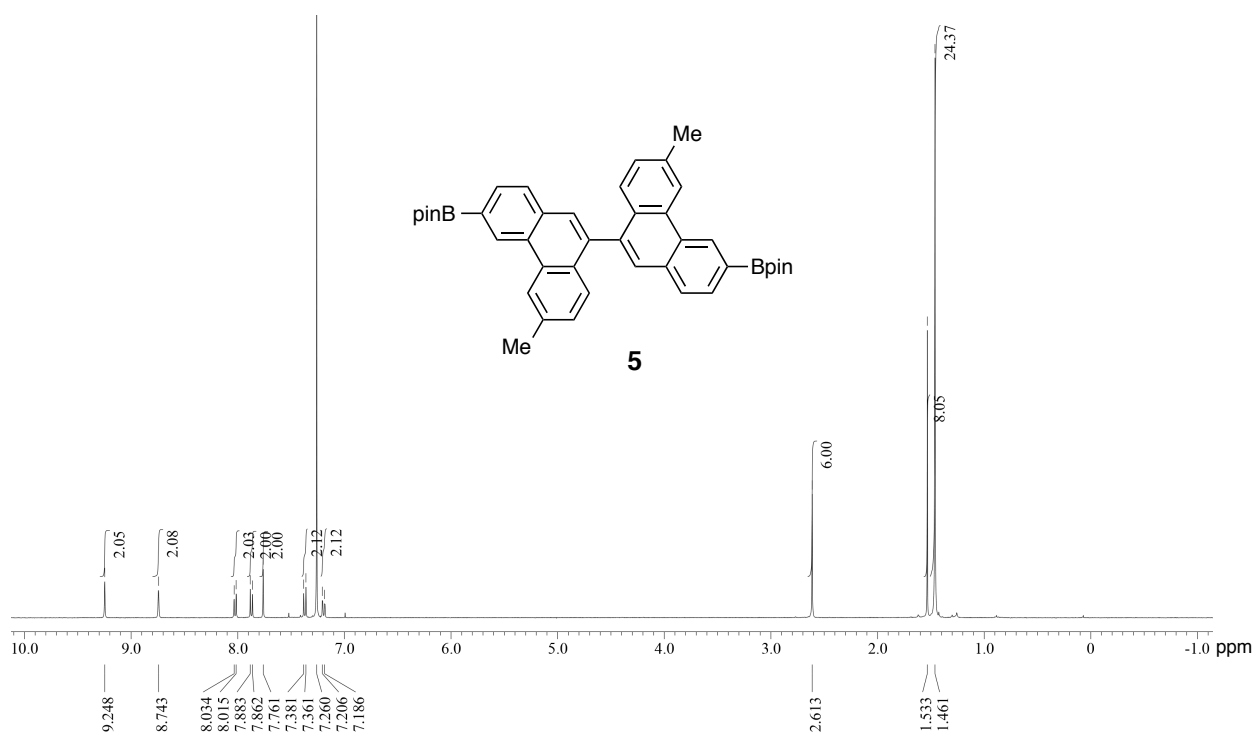

**Fig. S26.** <sup>1</sup>H NMR spectrum of **5** in CDCl<sub>3</sub> (25 °C, 600 MHz)

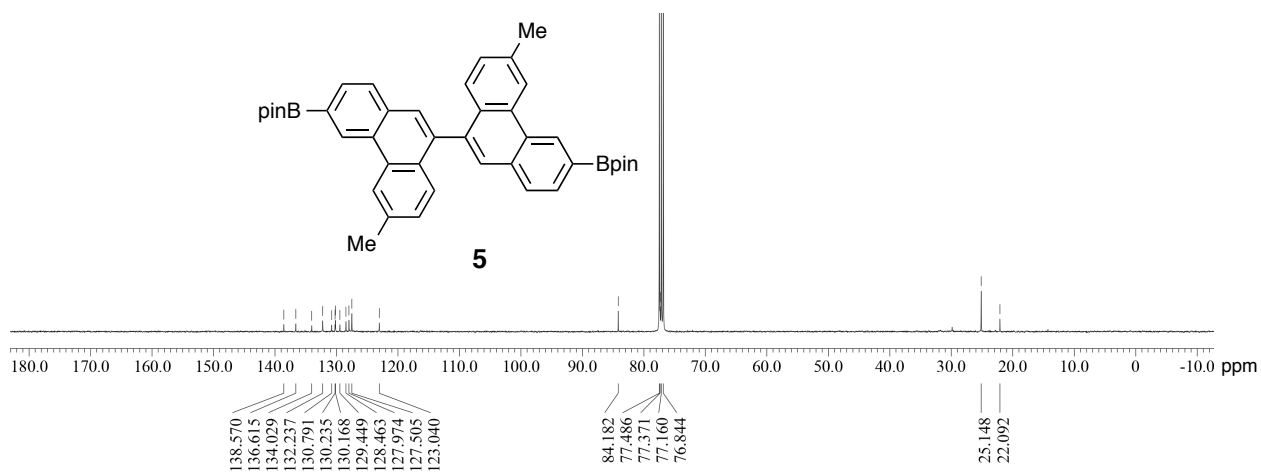

**Fig. S27.** <sup>13</sup>C NMR spectrum of **5** in CDCl<sub>3</sub> (25 °C, 150 MHz)

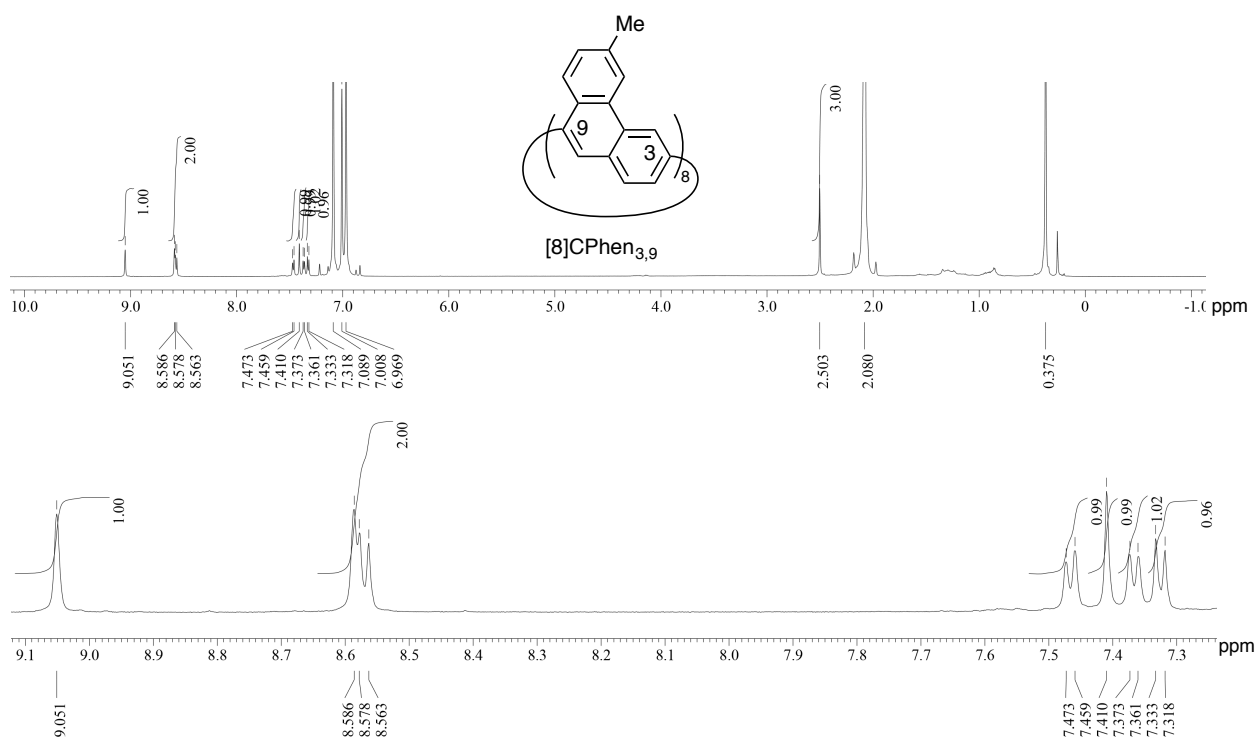

**Fig. S28.**  $^1\text{H}$  NMR spectrum of  $[8]\text{CPhen}_{3,9}$  in  $\text{toluene-}d_8$  (25 °C, 600 MHz). Spectrum expanded for the aromatic region is shown below.

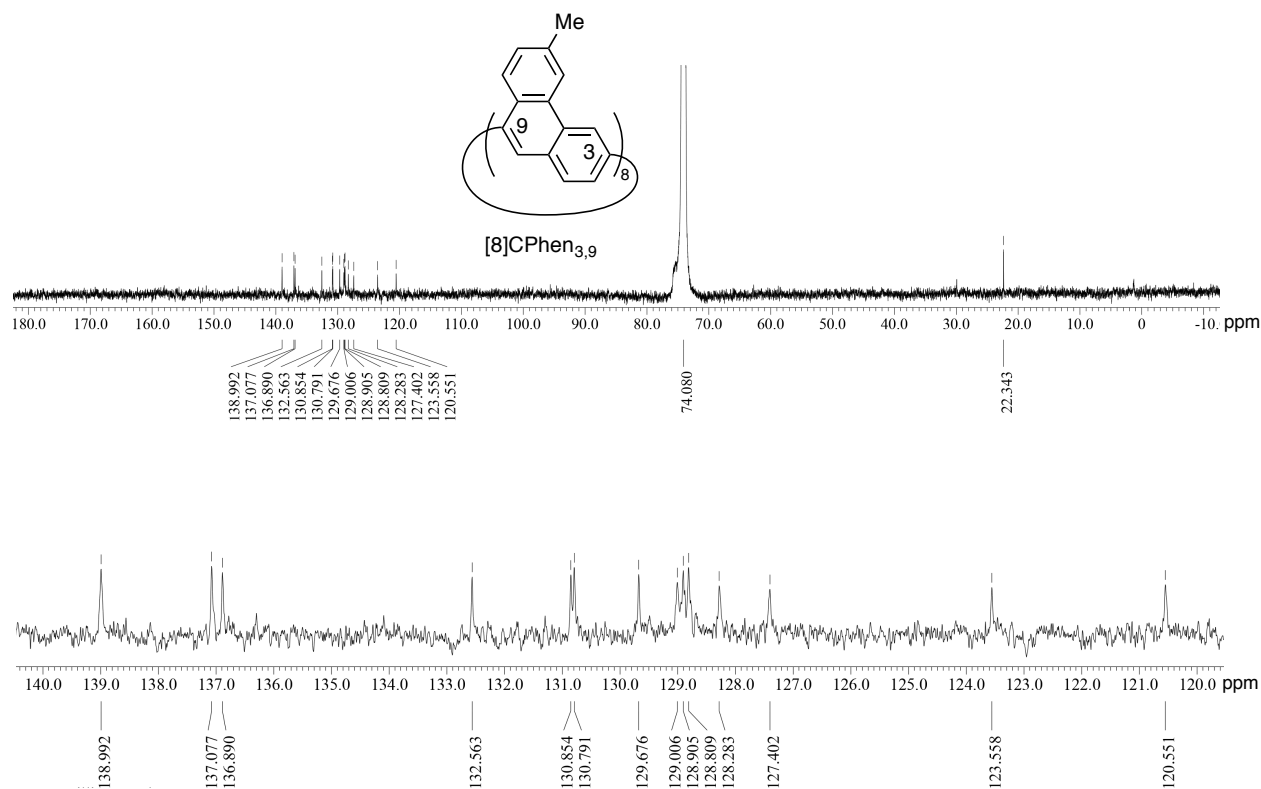

**Fig. S29.**  $^{13}\text{C}$  NMR spectrum of  $[8]\text{CPhen}_{3,9}$  in  $\text{C}_2\text{D}_2\text{Cl}_4$  (25 °C, 150 MHz). Spectrum expanded for the aromatic region is shown below.

## Crytallographic data

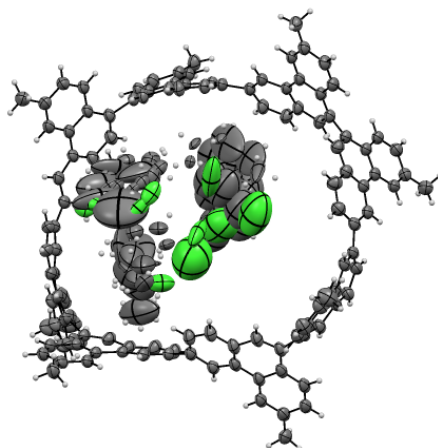

**Fig. S30.** ORTEP diagram of [8]CPhen<sub>3,9</sub> (50% probability level).

**Table S2.** Crystal data and structure refinement for [8]CPhen<sub>3,9</sub>

|                                  |                                                                                                                                                                  |
|----------------------------------|------------------------------------------------------------------------------------------------------------------------------------------------------------------|
| Data deposition                  | CCDC 1497765                                                                                                                                                     |
| Empirical formula                | C <sub>152</sub> H <sub>136</sub> Cl <sub>4</sub>                                                                                                                |
| Formula weight                   | 2104.40                                                                                                                                                          |
| Temperature                      | 95(2) K                                                                                                                                                          |
| Wavelength                       | 0.85000 Å                                                                                                                                                        |
| Crystal system                   | Monoclinic                                                                                                                                                       |
| Space group                      | <i>P2/c</i>                                                                                                                                                      |
| Crystal color                    | yellow                                                                                                                                                           |
| Unit cell dimensions             | $a = 10.0764(2) \text{ \AA}$ $\alpha = 90^\circ$<br>$b = 18.3514(5) \text{ \AA}$ $\beta = 94.5927(18)^\circ$<br>$c = 33.4402(6) \text{ \AA}$ $\gamma = 90^\circ$ |
| Volume                           | 6163.8(2) Å <sup>3</sup>                                                                                                                                         |
| <i>Z</i>                         | 2                                                                                                                                                                |
| Density (calculated)             | 1.134 Mg/m <sup>3</sup>                                                                                                                                          |
| Absorption coefficient           | 0.232 mm <sup>-1</sup>                                                                                                                                           |
| <i>F</i> (000)                   | 2232                                                                                                                                                             |
| Crystal size                     | 0.10 × 0.07 × 0.01 mm <sup>3</sup>                                                                                                                               |
| Theta range for data collection  | 2.425 to 29.614°                                                                                                                                                 |
| Index ranges                     | -11 ≤ <i>h</i> ≤ 11, -19 ≤ <i>k</i> ≤ 19, -38 ≤ <i>l</i> ≤ 38                                                                                                    |
| Reflections collected            | 30868                                                                                                                                                            |
| Independent reflections          | 9591 [ <i>R</i> (int) = 0.0340]                                                                                                                                  |
| Completeness to theta = 33.723 ° | 94.2 %                                                                                                                                                           |

|                                      |                                               |
|--------------------------------------|-----------------------------------------------|
| Absorption correction                | Semi-empirical from equivalents               |
| Max. and min. transmission           | 1.00000 and 0.87864                           |
| Refinement method                    | Full-matrix least-squares on $F^2$            |
| Data / restraints / parameters       | 9591 / 1332 / 1168                            |
| Goodness-of-fit on $F^2$             | 1.603                                         |
| Final R indices [ $I > 2\sigma(I)$ ] | $R_1 = 0.0810$ , $wR_2 = 0.2151$              |
| R indices (all data)                 | $R_1 = 0.1055$ , $wR_2 = 0.2288$              |
| Extinction coefficient               | n/a                                           |
| Largest diff. peak and hole          | 0.559 and - 0.297 e $\cdot$ $\text{\AA}^{-3}$ |

## Cartesian coordinates

**Table S3.** Cartesian coordinate of *E,R,E,R,E,R,E,R* (1)

SCF Done: E(RB3LYP) = -4621.35469074 A.U. after 9 cycles

| Center Number | Atomic Number | Atomic Type | Coordinates (Angstroms) |           |           |
|---------------|---------------|-------------|-------------------------|-----------|-----------|
|               |               |             | X                       | Y         | Z         |
| 1             | 6             | 0           | 10.450177               | 0.374766  | 3.336486  |
| 2             | 6             | 0           | 9.963123                | -0.263770 | 2.214705  |
| 3             | 6             | 0           | 9.198868                | 0.427139  | 1.244354  |
| 4             | 6             | 0           | 8.936945                | 1.815959  | 1.450124  |
| 5             | 6             | 0           | 9.453945                | 2.435639  | 2.610518  |
| 6             | 6             | 0           | 10.200379               | 1.747465  | 3.554355  |
| 7             | 6             | 0           | 8.713983                | -0.233326 | 0.044978  |
| 8             | 6             | 0           | 8.142884                | 2.548023  | 0.471715  |
| 9             | 6             | 0           | 7.879138                | 1.921391  | -0.778262 |
| 10            | 6             | 0           | 8.183373                | 0.537643  | -0.958118 |
| 11            | 6             | 0           | 7.155312                | 2.633393  | -1.763075 |
| 12            | 6             | 0           | 6.587448                | 3.855369  | -1.481339 |
| 13            | 6             | 0           | 6.717454                | 4.435245  | -0.192946 |
| 14            | 6             | 0           | 7.544150                | 3.799486  | 0.733050  |
| 15            | 6             | 0           | 10.750424               | 2.437129  | 4.779081  |
| 16            | 6             | 0           | 10.107997               | -2.696235 | -3.335907 |
| 17            | 6             | 0           | 9.774192                | -1.964167 | -2.215051 |
| 18            | 6             | 0           | 8.872990                | -2.466036 | -1.245970 |
| 19            | 6             | 0           | 8.307279                | -3.761184 | -1.451882 |
| 20            | 6             | 0           | 8.673877                | -4.481195 | -2.611610 |
| 21            | 6             | 0           | 9.557432                | -3.978154 | -3.554077 |
| 22            | 6             | 0           | 8.546369                | -1.713419 | -0.047138 |
| 23            | 6             | 0           | 7.369112                | -4.297081 | -0.473929 |
| 24            | 6             | 0           | 7.251323                | -3.627329 | 0.775927  |
| 25            | 6             | 0           | 7.856473                | -2.346236 | 0.955737  |
| 26            | 6             | 0           | 6.386321                | -4.159747 | 1.760290  |
| 27            | 6             | 0           | 5.560748                | -5.224703 | 1.478352  |
| 28            | 6             | 0           | 5.559079                | -5.819540 | 0.190245  |
| 29            | 6             | 0           | 6.506691                | -5.383680 | -0.735610 |
| 30            | 6             | 0           | 9.941048                | -4.774059 | -4.777897 |
| 31            | 6             | 0           | -10.109356              | 2.698140  | -3.334225 |
| 32            | 6             | 0           | -9.775137               | 1.965515  | -2.213865 |
| 33            | 6             | 0           | -8.873182               | 2.466661  | -1.245077 |
| 34            | 6             | 0           | -8.307415               | 3.761820  | -1.450631 |
| 35            | 6             | 0           | -8.674594               | 4.482518  | -2.609794 |
| 36            | 6             | 0           | -9.558592               | 3.980062  | -3.552115 |
| 37            | 6             | 0           | -8.546130               | 1.713403  | -0.046769 |
| 38            | 6             | 0           | -7.368814               | 4.297210  | -0.472847 |
| 39            | 6             | 0           | -7.250593               | 3.626932  | 0.776658  |
| 40            | 6             | 0           | -7.855721               | 2.345773  | 0.956120  |
| 41            | 6             | 0           | -6.385186               | 4.158965  | 1.760874  |
| 42            | 6             | 0           | -5.559717               | 5.224003  | 1.479054  |
| 43            | 6             | 0           | -5.558489               | 5.819400  | 0.191197  |
| 44            | 6             | 0           | -6.506391               | 5.383790  | -0.734456 |
| 45            | 6             | 0           | -9.942227               | 4.776340  | -4.775687 |
| 46            | 6             | 0           | -10.452983              | -0.376509 | 3.334257  |
| 47            | 6             | 0           | -9.965043               | 0.262543  | 2.213137  |
| 48            | 6             | 0           | -9.199618               | -0.427788 | 1.243269  |
| 49            | 6             | 0           | -8.937818               | -1.816681 | 1.448684  |
| 50            | 6             | 0           | -9.455787               | -2.436923 | 2.608378  |

|     |   |   |            |            |           |
|-----|---|---|------------|------------|-----------|
| 51  | 6 | 0 | -10.203075 | -1.749219  | 3.551893  |
| 52  | 6 | 0 | -8.713751  | 0.233228   | 0.044570  |
| 53  | 6 | 0 | -8.142983  | -2.548329  | 0.470622  |
| 54  | 6 | 0 | -7.878436  | -1.921265  | -0.778963 |
| 55  | 6 | 0 | -8.182532  | -0.537442  | -0.958517 |
| 56  | 6 | 0 | -7.154006  | -2.632958  | -1.763547 |
| 57  | 6 | 0 | -6.586358  | -3.855023  | -1.481840 |
| 58  | 6 | 0 | -6.717140  | -4.435295  | -0.193699 |
| 59  | 6 | 0 | -7.544370  | -3.799828  | 0.731968  |
| 60  | 6 | 0 | -10.754182 | -2.439388  | 4.775871  |
| 61  | 6 | 0 | -2.693600  | -10.107439 | -3.333532 |
| 62  | 6 | 0 | -1.962190  | -9.772137  | -2.212714 |
| 63  | 6 | 0 | -2.465001  | -8.870361  | -1.244641 |
| 64  | 6 | 0 | -3.760345  | -8.305458  | -1.451650 |
| 65  | 6 | 0 | -4.479761  | -8.673765  | -2.611270 |
| 66  | 6 | 0 | -3.975814  | -9.557880  | -3.552718 |
| 67  | 6 | 0 | -1.713169  | -8.542526  | -0.045689 |
| 68  | 6 | 0 | -4.297287  | -7.366881  | -0.474575 |
| 69  | 6 | 0 | -3.628258  | -7.247914  | 0.775565  |
| 70  | 6 | 0 | -2.346867  | -7.852135  | 0.956405  |
| 71  | 6 | 0 | -4.161853  | -6.382862  | 1.759227  |
| 72  | 6 | 0 | -5.227269  | -5.558279  | 1.476356  |
| 73  | 6 | 0 | -5.821279  | -5.557488  | 0.187893  |
| 74  | 6 | 0 | -5.384184  | -6.505133  | -0.737339 |
| 75  | 6 | 0 | -4.770942  | -9.942987  | -4.776568 |
| 76  | 6 | 0 | 0.373726   | -10.444197 | 3.340180  |
| 77  | 6 | 0 | -0.264363  | -9.957800  | 2.217819  |
| 78  | 6 | 0 | 0.426917   | -9.194119  | 1.247246  |
| 79  | 6 | 0 | 1.815789   | -8.932549  | 1.453207  |
| 80  | 6 | 0 | 2.435043   | -9.449016  | 2.614090  |
| 81  | 6 | 0 | 1.746361   | -10.194419 | 3.558398  |
| 82  | 6 | 0 | -0.233043  | -8.709794  | 0.047354  |
| 83  | 6 | 0 | 2.548348   | -8.139325  | 0.474501  |
| 84  | 6 | 0 | 1.922159   | -7.876103  | -0.775813 |
| 85  | 6 | 0 | 0.538386   | -8.180041  | -0.955898 |
| 86  | 6 | 0 | 2.634699   | -7.153171  | -1.760876 |
| 87  | 6 | 0 | 3.856813   | -6.585662  | -1.479146 |
| 88  | 6 | 0 | 4.436278   | -6.715050  | -0.190501 |
| 89  | 6 | 0 | 3.799964   | -7.540921  | 0.735835  |
| 90  | 6 | 0 | 2.435369   | -10.742980 | 4.784188  |
| 91  | 6 | 0 | 2.694276   | 10.106239  | -3.334465 |
| 92  | 6 | 0 | 1.962969   | 9.771747   | -2.213357 |
| 93  | 6 | 0 | 2.465557   | 8.870179   | -1.244974 |
| 94  | 6 | 0 | 3.760815   | 8.305080   | -1.451792 |
| 95  | 6 | 0 | 4.480172   | 8.672595   | -2.611665 |
| 96  | 6 | 0 | 3.976290   | 9.556223   | -3.553560 |
| 97  | 6 | 0 | 1.713614   | 8.542769   | -0.045961 |
| 98  | 6 | 0 | 4.297614   | 7.366776   | -0.474490 |
| 99  | 6 | 0 | 3.628480   | 7.248183   | 0.775609  |
| 100 | 6 | 0 | 2.347167   | 7.852597   | 0.956229  |
| 101 | 6 | 0 | 4.161912   | 6.383217   | 1.759470  |
| 102 | 6 | 0 | 5.227281   | 5.558426   | 1.476806  |
| 103 | 6 | 0 | 5.821468   | 5.557430   | 0.188399  |
| 104 | 6 | 0 | 5.384503   | 6.504961   | -0.737013 |
| 105 | 6 | 0 | 4.771258   | 9.940489   | -4.777789 |
| 106 | 6 | 0 | -0.373106  | 10.445414  | 3.339217  |
| 107 | 6 | 0 | 0.264926   | 9.958633   | 2.217024  |
| 108 | 6 | 0 | -0.426404  | 9.194665   | 1.246729  |
| 109 | 6 | 0 | -1.815192  | 8.932998   | 1.452947  |



|     |   |   |            |            |           |
|-----|---|---|------------|------------|-----------|
| 110 | 6 | 0 | -2.434415  | 9.449882   | 2.613639  |
| 111 | 6 | 0 | -1.745771  | 10.195847  | 3.557502  |
| 112 | 6 | 0 | 0.233516   | 8.710058   | 0.046925  |
| 113 | 6 | 0 | -2.547789  | 8.139409   | 0.474583  |
| 114 | 6 | 0 | -1.921749  | 7.876048   | -0.775759 |
| 115 | 6 | 0 | -0.537999  | 8.180035   | -0.956071 |
| 116 | 6 | 0 | -2.634476  | 7.153014   | -1.760625 |
| 117 | 6 | 0 | -3.856574  | 6.585538   | -1.478658 |
| 118 | 6 | 0 | -4.435761  | 6.714871   | -0.189886 |
| 119 | 6 | 0 | -3.799267  | 7.540887   | 0.736227  |
| 120 | 6 | 0 | -2.434929  | 10.745674  | 4.782620  |
| 121 | 1 | 0 | 6.980831   | 2.162260   | -2.726788 |
| 122 | 1 | 0 | 5.952493   | 4.332852   | -2.220199 |
| 123 | 1 | 0 | 7.668033   | 4.250152   | 1.711519  |
| 124 | 1 | 0 | 7.835831   | 0.062028   | -1.870328 |
| 125 | 1 | 0 | 10.180368  | -1.314454  | 2.055314  |
| 126 | 1 | 0 | 11.045894  | -0.181509  | 4.055987  |
| 127 | 1 | 0 | 9.288417   | 3.498133   | 2.758554  |
| 128 | 1 | 0 | 10.492494  | 3.499416   | 4.791290  |
| 129 | 1 | 0 | 10.358190  | 1.986467   | 5.698425  |
| 130 | 1 | 0 | 11.842651  | 2.356126   | 4.825098  |
| 131 | 1 | 0 | 4.835008   | -5.548611  | 2.216851  |
| 132 | 1 | 0 | 6.527090   | -5.850099  | -1.714393 |
| 133 | 1 | 0 | 6.320559   | -3.661328  | 2.723858  |
| 134 | 1 | 0 | 7.622637   | -1.804497  | 1.867339  |
| 135 | 1 | 0 | 8.274447   | -5.479473  | -2.760285 |
| 136 | 1 | 0 | 10.220901  | -0.988644  | -2.055623 |
| 137 | 1 | 0 | 10.814522  | -2.287961  | -4.054349 |
| 138 | 1 | 0 | 9.456725   | -5.754163  | -4.787833 |
| 139 | 1 | 0 | 9.655873   | -4.250076  | -5.697826 |
| 140 | 1 | 0 | 11.024413  | -4.934433  | -4.825167 |
| 141 | 1 | 0 | -6.319047  | 3.660157   | 2.724213  |
| 142 | 1 | 0 | -4.833644  | 5.547463   | 2.217411  |
| 143 | 1 | 0 | -6.527106  | 5.850487   | -1.713095 |
| 144 | 1 | 0 | -7.621509  | 1.803602   | 1.867357  |
| 145 | 1 | 0 | -10.222273 | 0.990190   | -2.054452 |
| 146 | 1 | 0 | -10.816566 | 2.290434   | -4.052324 |
| 147 | 1 | 0 | -8.275170  | 5.480844   | -2.758143 |
| 148 | 1 | 0 | -9.462324  | 5.758633   | -4.782432 |
| 149 | 1 | 0 | -9.651758  | 4.255332   | -5.695681 |
| 150 | 1 | 0 | -11.026145 | 4.931780   | -4.826049 |
| 151 | 1 | 0 | -5.950850  | -4.332230  | -2.220396 |
| 152 | 1 | 0 | -7.668847  | -4.250787  | 1.710221  |
| 153 | 1 | 0 | -6.978857  | -2.161484  | -2.726970 |
| 154 | 1 | 0 | -7.834388  | -0.061565  | -1.870353 |
| 155 | 1 | 0 | -9.290493  | -3.499516  | 2.755946  |
| 156 | 1 | 0 | -10.182521 | 1.313187   | 2.053886  |
| 157 | 1 | 0 | -11.049605 | 0.179344   | 4.053337  |
| 158 | 1 | 0 | -11.845875 | -2.352829  | 4.824369  |
| 159 | 1 | 0 | -10.501703 | -3.503022  | 4.784734  |
| 160 | 1 | 0 | -10.357737 | -1.993268  | 5.695625  |
| 161 | 1 | 0 | -3.664003  | -6.316268  | 2.723034  |
| 162 | 1 | 0 | -5.552114  | -4.832413  | 2.214328  |
| 163 | 1 | 0 | -5.849931  | -6.526210  | -1.716405 |
| 164 | 1 | 0 | -1.805759  | -7.617499  | 1.868170  |
| 165 | 1 | 0 | -0.986675  | -10.218494 | -2.052255 |
| 166 | 1 | 0 | -2.284723  | -10.814633 | -4.050973 |
| 167 | 1 | 0 | -5.478303  | -8.275292  | -2.760595 |
| 168 | 1 | 0 | -4.247071  | -9.657590  | -5.696517 |

|     |   |   |           |            |           |
|-----|---|---|-----------|------------|-----------|
| 169 | 1 | 0 | -4.930115 | -11.026508 | -4.823358 |
| 170 | 1 | 0 | -5.751569 | -9.459690  | -4.787060 |
| 171 | 1 | 0 | 4.334905  | -5.951583  | -2.218363 |
| 172 | 1 | 0 | 4.250477  | -7.664676  | 1.714372  |
| 173 | 1 | 0 | 2.163960  | -6.979214  | -2.724875 |
| 174 | 1 | 0 | 0.063204  | -7.833155  | -1.868580 |
| 175 | 1 | 0 | 3.497598  | -9.283957  | 2.762128  |
| 176 | 1 | 0 | -1.314947 | -10.175250 | 2.058138  |
| 177 | 1 | 0 | -0.182842 | -11.039514 | 4.059790  |
| 178 | 1 | 0 | 3.500456  | -10.496564 | 4.790001  |
| 179 | 1 | 0 | 1.993133  | -10.338877 | 5.702520  |
| 180 | 1 | 0 | 2.342565  | -11.833829 | 4.838764  |
| 181 | 1 | 0 | 3.664000  | 6.316871   | 2.723260  |
| 182 | 1 | 0 | 5.552045  | 4.832708   | 2.214959  |
| 183 | 1 | 0 | 5.850308  | 6.525858   | -1.716064 |
| 184 | 1 | 0 | 1.806018  | 7.618215   | 1.868025  |
| 185 | 1 | 0 | 0.987501  | 10.218269  | -2.053122 |
| 186 | 1 | 0 | 2.285415  | 10.813021  | -4.052320 |
| 187 | 1 | 0 | 5.478564  | 8.273701   | -2.760950 |
| 188 | 1 | 0 | 5.752593  | 9.458658   | -4.787140 |
| 189 | 1 | 0 | 4.248060  | 9.652848   | -5.697412 |
| 190 | 1 | 0 | 4.928802  | 11.024199  | -4.826350 |
| 191 | 1 | 0 | -4.334717 | 5.951364   | -2.217766 |
| 192 | 1 | 0 | -4.249605 | 7.664837   | 1.714815  |
| 193 | 1 | 0 | -2.163916 | 6.978962   | -2.724696 |
| 194 | 1 | 0 | -0.062956 | 7.832970   | -1.868749 |
| 195 | 1 | 0 | -3.496900 | 9.284564   | 2.761946  |
| 196 | 1 | 0 | 1.315534  | 10.175928  | 2.057300  |
| 197 | 1 | 0 | 0.183539  | 11.040829  | 4.058681  |
| 198 | 1 | 0 | -3.497424 | 10.488583  | 4.794748  |
| 199 | 1 | 0 | -1.984522 | 10.352506  | 5.701692  |
| 200 | 1 | 0 | -2.353037 | 11.837803  | 4.829304  |

**Table S4.** Cartesian coordinate of  $E,R,E,R,E,R,Z,S$  (2)

SCF Done: E(RB3LYP) = -4621.34869885 A.U. after 7 cycles

| Center<br>Number | Atomic<br>Number | Atomic<br>Type | Coordinates (Angstroms) |            |           |
|------------------|------------------|----------------|-------------------------|------------|-----------|
|                  |                  |                | X                       | Y          | Z         |
| 1                | 6                | 0              | -1.661842               | -6.562677  | 3.497200  |
| 2                | 6                | 0              | -1.123379               | -7.123961  | 2.358214  |
| 3                | 6                | 0              | -1.903013               | -7.336015  | 1.193828  |
| 4                | 6                | 0              | -3.254336               | -6.879434  | 1.206821  |
| 5                | 6                | 0              | -3.778792               | -6.330122  | 2.399685  |
| 6                | 6                | 0              | -3.017398               | -6.172604  | 3.545522  |
| 7                | 6                | 0              | -1.363946               | -7.957533  | -0.009099 |
| 8                | 6                | 0              | -4.040087               | -6.933272  | -0.016391 |
| 9                | 6                | 0              | -3.533014               | -7.664582  | -1.124609 |
| 10               | 6                | 0              | -2.197748               | -8.180727  | -1.074003 |
| 11               | 6                | 0              | -4.304209               | -7.721636  | -2.311527 |
| 12               | 6                | 0              | -5.448952               | -6.965468  | -2.457337 |
| 13               | 6                | 0              | -5.886909               | -6.112364  | -1.412410 |
| 14               | 6                | 0              | -5.208279               | -6.164640  | -0.197406 |
| 15               | 6                | 0              | -3.603956               | -5.598060  | 4.811662  |
| 16               | 6                | 0              | 1.198129                | -10.772711 | 2.267331  |
| 17               | 6                | 0              | 0.398039                | -9.963362  | 1.487695  |
| 18               | 6                | 0              | 0.951501                | -8.954607  | 0.664576  |
| 19               | 6                | 0              | 2.369591                | -8.783362  | 0.653814  |

|    |   |   |           |            |           |
|----|---|---|-----------|------------|-----------|
| 20 | 6 | 0 | 3.155954  | -9.631385  | 1.466446  |
| 21 | 6 | 0 | 2.602487  | -10.618209 | 2.268076  |
| 22 | 6 | 0 | 0.114134  | -8.120203  | -0.175666 |
| 23 | 6 | 0 | 2.961073  | -7.752940  | -0.191174 |
| 24 | 6 | 0 | 2.131153  | -7.138589  | -1.169902 |
| 25 | 6 | 0 | 0.716476  | -7.337832  | -1.124768 |
| 26 | 6 | 0 | 2.697527  | -6.204763  | -2.066432 |
| 27 | 6 | 0 | 3.995741  | -5.774661  | -1.911286 |
| 28 | 6 | 0 | 4.790627  | -6.249354  | -0.836416 |
| 29 | 6 | 0 | 4.280799  | -7.271491  | -0.036665 |
| 30 | 6 | 0 | 3.466747  | -11.519868 | 3.115746  |
| 31 | 6 | 0 | -1.013174 | 9.487626   | 4.093617  |
| 32 | 6 | 0 | -0.328520 | 9.199006   | 2.931206  |
| 33 | 6 | 0 | -0.951672 | 8.525266   | 1.853710  |
| 34 | 6 | 0 | -2.322213 | 8.147263   | 1.991578  |
| 35 | 6 | 0 | -2.990372 | 8.461600   | 3.197013  |
| 36 | 6 | 0 | -2.367496 | 9.118615   | 4.246674  |
| 37 | 6 | 0 | -0.242864 | 8.248474   | 0.616242  |
| 38 | 6 | 0 | -2.988133 | 7.450061   | 0.898661  |
| 39 | 6 | 0 | -2.324654 | 7.389500   | -0.358648 |
| 40 | 6 | 0 | -0.960474 | 7.799050   | -0.463136 |
| 41 | 6 | 0 | -2.975888 | 6.767455   | -1.449431 |
| 42 | 6 | 0 | -4.174289 | 6.111276   | -1.280352 |
| 43 | 6 | 0 | -4.788370 | 6.042388   | -0.003400 |
| 44 | 6 | 0 | -4.211894 | 6.760843   | 1.043598  |
| 45 | 6 | 0 | -3.108825 | 9.450897   | 5.518773  |
| 46 | 6 | 0 | 2.113970  | 10.261513  | -2.515278 |
| 47 | 6 | 0 | 1.406182  | 9.726970   | -1.458461 |
| 48 | 6 | 0 | 1.977040  | 8.755038   | -0.602433 |
| 49 | 6 | 0 | 3.318179  | 8.333972   | -0.854423 |
| 50 | 6 | 0 | 4.011549  | 8.904863   | -1.945811 |
| 51 | 6 | 0 | 3.439972  | 9.853931   | -2.778936 |
| 52 | 6 | 0 | 1.246931  | 8.213244   | 0.530923  |
| 53 | 6 | 0 | 3.928619  | 7.330783   | 0.008291  |
| 54 | 6 | 0 | 3.263344  | 6.997335   | 1.221058  |
| 55 | 6 | 0 | 1.930519  | 7.457695   | 1.449713  |
| 56 | 6 | 0 | 3.867889  | 6.070321   | 2.102218  |
| 57 | 6 | 0 | 5.007871  | 5.387453   | 1.741296  |
| 58 | 6 | 0 | 5.605539  | 5.597072   | 0.471873  |
| 59 | 6 | 0 | 5.090198  | 6.607701   | -0.339000 |
| 60 | 6 | 0 | 4.207787  | 10.455087  | -3.930992 |
| 61 | 6 | 0 | 10.824135 | 0.595574   | 2.954490  |
| 62 | 6 | 0 | 10.349197 | 0.025097   | 1.791103  |
| 63 | 6 | 0 | 9.476336  | 0.726658   | 0.926160  |
| 64 | 6 | 0 | 9.095809  | 2.057009   | 1.280905  |
| 65 | 6 | 0 | 9.601787  | 2.607141   | 2.480340  |
| 66 | 6 | 0 | 10.452192 | 1.906966   | 3.322181  |
| 67 | 6 | 0 | 8.995110  | 0.139586   | -0.313542 |
| 68 | 6 | 0 | 8.201857  | 2.805483   | 0.406259  |
| 69 | 6 | 0 | 7.958264  | 2.286987   | -0.895871 |
| 70 | 6 | 0 | 8.367545  | 0.957910   | -1.219533 |
| 71 | 6 | 0 | 7.150396  | 3.027415   | -1.789956 |
| 72 | 6 | 0 | 6.486529  | 4.158961   | -1.373264 |
| 73 | 6 | 0 | 6.594938  | 4.610004   | -0.032505 |
| 74 | 6 | 0 | 7.497223  | 3.960476   | 0.809989  |
| 75 | 6 | 0 | 10.988262 | 2.524206   | 4.591008  |
| 76 | 6 | 0 | 10.142655 | -1.887505  | -4.063902 |
| 77 | 6 | 0 | 9.922588  | -1.300810  | -2.834045 |
| 78 | 6 | 0 | 9.132591  | -1.932733  | -1.844892 |

|     |   |   |            |            |           |
|-----|---|---|------------|------------|-----------|
| 79  | 6 | 0 | 8.564122   | -3.206737  | -2.145669 |
| 80  | 6 | 0 | 8.809236   | -3.776066  | -3.415462 |
| 81  | 6 | 0 | 9.582163   | -3.144700  | -4.377932 |
| 82  | 6 | 0 | 8.917299   | -1.333062  | -0.537101 |
| 83  | 6 | 0 | 7.747317   | -3.878736  | -1.144307 |
| 84  | 6 | 0 | 7.792687   | -3.389480  | 0.190765  |
| 85  | 6 | 0 | 8.383977   | -2.115504  | 0.457139  |
| 86  | 6 | 0 | 7.072146   | -4.076763  | 1.195849  |
| 87  | 6 | 0 | 6.205442   | -5.098135  | 0.873267  |
| 88  | 6 | 0 | 6.010157   | -5.478322  | -0.478976 |
| 89  | 6 | 0 | 6.836236   | -4.912110  | -1.449145 |
| 90  | 6 | 0 | 9.840027   | -3.780454  | -5.722425 |
| 91  | 6 | 0 | -10.658454 | -1.571124  | 2.428683  |
| 92  | 6 | 0 | -10.195963 | -0.775405  | 1.400493  |
| 93  | 6 | 0 | -9.426857  | -1.311176  | 0.340201  |
| 94  | 6 | 0 | -9.133929  | -2.708458  | 0.354850  |
| 95  | 6 | 0 | -9.624076  | -3.491470  | 1.424409  |
| 96  | 6 | 0 | -10.376728 | -2.954493  | 2.457396  |
| 97  | 6 | 0 | -8.968266  | -0.485242  | -0.764389 |
| 98  | 6 | 0 | -8.338163  | -3.284147  | -0.721182 |
| 99  | 6 | 0 | -8.120861  | -2.496363  | -1.885938 |
| 100 | 6 | 0 | -8.450630  | -1.106083  | -1.873340 |
| 101 | 6 | 0 | -7.411384  | -3.060868  | -2.971844 |
| 102 | 6 | 0 | -6.801622  | -4.290655  | -2.857499 |
| 103 | 6 | 0 | -6.865837  | -5.018525  | -1.641784 |
| 104 | 6 | 0 | -7.691462  | -4.535282  | -0.627472 |
| 105 | 6 | 0 | -10.900930 | -3.816091  | 3.580459  |
| 106 | 6 | 0 | -10.359221 | 2.427165   | -3.772726 |
| 107 | 6 | 0 | -10.029702 | 1.545889   | -2.763561 |
| 108 | 6 | 0 | -9.137254  | 1.908862   | -1.726831 |
| 109 | 6 | 0 | -8.579249  | 3.223745   | -1.741818 |
| 110 | 6 | 0 | -8.941069  | 4.098195   | -2.791762 |
| 111 | 6 | 0 | -9.813290  | 3.728998   | -3.803935 |
| 112 | 6 | 0 | -8.811215  | 0.994018   | -0.646305 |
| 113 | 6 | 0 | -7.656176  | 3.624038   | -0.687352 |
| 114 | 6 | 0 | -7.539877  | 2.781886   | 0.453588  |
| 115 | 6 | 0 | -8.130838  | 1.481966   | 0.440796  |
| 116 | 6 | 0 | -6.694603  | 3.178313   | 1.516206  |
| 117 | 6 | 0 | -5.888990  | 4.289191   | 1.405801  |
| 118 | 6 | 0 | -5.886464  | 5.066741   | 0.219235  |
| 119 | 6 | 0 | -6.810831  | 4.751317   | -0.776228 |
| 120 | 6 | 0 | -10.191515 | 4.688282   | -4.906169 |
| 121 | 1 | 0 | -3.944839  | -8.326891  | -3.139892 |
| 122 | 1 | 0 | -5.995339  | -6.989608  | -3.395572 |
| 123 | 1 | 0 | -5.509149  | -5.479060  | 0.585376  |
| 124 | 1 | 0 | -1.802981  | -8.664163  | -1.963798 |
| 125 | 1 | 0 | -0.081648  | -7.415959  | 2.359489  |
| 126 | 1 | 0 | -1.033594  | -6.424758  | 4.373771  |
| 127 | 1 | 0 | -4.822270  | -6.033509  | 2.428315  |
| 128 | 1 | 0 | -3.566639  | -6.323642  | 5.632909  |
| 129 | 1 | 0 | -3.046417  | -4.713875  | 5.141631  |
| 130 | 1 | 0 | -4.647629  | -5.303630  | 4.672820  |
| 131 | 1 | 0 | 4.381493   | -4.986001  | -2.548772 |
| 132 | 1 | 0 | 4.894553   | -7.653189  | 0.772665  |
| 133 | 1 | 0 | 2.066469   | -5.766540  | -2.835093 |
| 134 | 1 | 0 | 0.100227   | -6.734054  | -1.784527 |
| 135 | 1 | 0 | 4.236730   | -9.532007  | 1.440353  |
| 136 | 1 | 0 | -0.678703  | -10.100637 | 1.488440  |
| 137 | 1 | 0 | 0.745225   | -11.547259 | 2.881248  |

|     |   |   |            |            |           |
|-----|---|---|------------|------------|-----------|
| 138 | 1 | 0 | 4.529411   | -11.304730 | 2.975632  |
| 139 | 1 | 0 | 3.302459   | -12.575334 | 2.869862  |
| 140 | 1 | 0 | 3.238791   | -11.401536 | 4.181744  |
| 141 | 1 | 0 | -2.476159  | 6.747111   | -2.414310 |
| 142 | 1 | 0 | -4.605779  | 5.560829   | -2.109864 |
| 143 | 1 | 0 | -4.690149  | 6.730108   | 2.016318  |
| 144 | 1 | 0 | -0.449170  | 7.606181   | -1.401474 |
| 145 | 1 | 0 | 0.706007   | 9.506731   | 2.824642  |
| 146 | 1 | 0 | -0.508826  | 10.018426  | 4.897307  |
| 147 | 1 | 0 | -4.040638  | 8.207559   | 3.299762  |
| 148 | 1 | 0 | -2.648637  | 8.962350   | 6.385808  |
| 149 | 1 | 0 | -3.096899  | 10.528968  | 5.716744  |
| 150 | 1 | 0 | -4.153003  | 9.130709   | 5.470231  |
| 151 | 1 | 0 | 5.395942   | 4.610068   | 2.391269  |
| 152 | 1 | 0 | 5.558120   | 6.788804   | -1.300388 |
| 153 | 1 | 0 | 3.371796   | 5.841480   | 3.041724  |
| 154 | 1 | 0 | 1.405168   | 7.063573   | 2.314508  |
| 155 | 1 | 0 | 5.041997   | 8.614699   | -2.125193 |
| 156 | 1 | 0 | 0.394968   | 10.065654  | -1.260815 |
| 157 | 1 | 0 | 1.650972   | 11.016808  | -3.145503 |
| 158 | 1 | 0 | 5.225676   | 10.059871  | -3.984465 |
| 159 | 1 | 0 | 3.716318   | 10.245321  | -4.888404 |
| 160 | 1 | 0 | 4.275105   | 11.545348  | -3.839287 |
| 161 | 1 | 0 | 6.992356   | 2.642445   | -2.793960 |
| 162 | 1 | 0 | 5.794127   | 4.652648   | -2.047041 |
| 163 | 1 | 0 | 7.602290   | 4.314714   | 1.829751  |
| 164 | 1 | 0 | 8.019490   | 0.545228   | -2.161161 |
| 165 | 1 | 0 | 10.660898  | -0.976811  | 1.516009  |
| 166 | 1 | 0 | 11.504539  | 0.034109   | 3.589985  |
| 167 | 1 | 0 | 9.342584   | 3.628546   | 2.741351  |
| 168 | 1 | 0 | 10.702006  | 1.935725   | 5.470611  |
| 169 | 1 | 0 | 12.083546  | 2.569569   | 4.580302  |
| 170 | 1 | 0 | 10.612670  | 3.541096   | 4.732550  |
| 171 | 1 | 0 | 5.583274   | -5.540232  | 1.644906  |
| 172 | 1 | 0 | 6.707731   | -5.216555  | -2.482459 |
| 173 | 1 | 0 | 7.141081   | -3.726431  | 2.222340  |
| 174 | 1 | 0 | 8.239511   | -1.696830  | 1.448289  |
| 175 | 1 | 0 | 8.406817   | -4.759750  | -3.637725 |
| 176 | 1 | 0 | 10.375797  | -0.342179  | -2.605426 |
| 177 | 1 | 0 | 10.767420  | -1.382294  | -4.796326 |
| 178 | 1 | 0 | 9.363836   | -4.761414  | -5.799905 |
| 179 | 1 | 0 | 9.455362   | -3.155908  | -6.537367 |
| 180 | 1 | 0 | 10.913350  | -3.912843  | -5.901435 |
| 181 | 1 | 0 | -7.280447  | -2.470894  | -3.875161 |
| 182 | 1 | 0 | -6.179264  | -4.658724  | -3.666763 |
| 183 | 1 | 0 | -7.767740  | -5.104380  | 0.292761  |
| 184 | 1 | 0 | -8.125511  | -0.507169  | -2.718728 |
| 185 | 1 | 0 | -10.438151 | 0.281766   | 1.386379  |
| 186 | 1 | 0 | -11.260247 | -1.131296  | 3.220172  |
| 187 | 1 | 0 | -9.434222  | -4.560328  | 1.424449  |
| 188 | 1 | 0 | -10.504150 | -3.490773  | 4.549481  |
| 189 | 1 | 0 | -11.993551 | -3.760407  | 3.648524  |
| 190 | 1 | 0 | -10.627201 | -4.865500  | 3.442538  |
| 191 | 1 | 0 | -5.179798  | 4.517573   | 2.194544  |
| 192 | 1 | 0 | -6.829183  | 5.356523   | -1.675856 |
| 193 | 1 | 0 | -6.629997  | 2.545195   | 2.397189  |
| 194 | 1 | 0 | -7.897186  | 0.817230   | 1.266870  |
| 195 | 1 | 0 | -8.546707  | 5.109514   | -2.794905 |
| 196 | 1 | 0 | -10.473135 | 0.556197   | -2.746005 |

|     |   |   |            |          |           |
|-----|---|---|------------|----------|-----------|
| 197 | 1 | 0 | -11.058627 | 2.121343 | -4.546881 |
| 198 | 1 | 0 | -9.695844  | 5.655021 | -4.784303 |
| 199 | 1 | 0 | -9.915356  | 4.291490 | -5.890194 |
| 200 | 1 | 0 | -11.273115 | 4.865864 | -4.926028 |

**Table S5.** Cartesian coordinate of *E,R,E,R,Z,S,Z,R* (3)

SCF Done: E(RB3LYP) = -4621.34868696 A.U. after 5 cycles

| Center<br>Number | Atomic<br>Number | Atomic<br>Type | Coordinates (Angstroms) |           |           |
|------------------|------------------|----------------|-------------------------|-----------|-----------|
|                  |                  |                | X                       | Y         | Z         |
| 1                | 6                | 0              | -10.234820              | -2.449127 | -2.677030 |
| 2                | 6                | 0              | -9.778223               | -1.460546 | -1.830169 |
| 3                | 6                | 0              | -8.928330               | -1.757666 | -0.738054 |
| 4                | 6                | 0              | -8.540282               | -3.116731 | -0.528229 |
| 5                | 6                | 0              | -9.032235               | -4.101470 | -1.414979 |
| 6                | 6                | 0              | -9.866950               | -3.798207 | -2.479364 |
| 7                | 6                | 0              | -8.480116               | -0.724232 | 0.177248  |
| 8                | 6                | 0              | -7.642357               | -3.444147 | 0.572686  |
| 9                | 6                | 0              | -7.385185               | -2.437376 | 1.545130  |
| 10               | 6                | 0              | -7.830784               | -1.099376 | 1.324732  |
| 11               | 6                | 0              | -6.540000               | -2.739628 | 2.636879  |
| 12               | 6                | 0              | -5.867573               | -3.937817 | 2.702607  |
| 13               | 6                | 0              | -6.013253               | -4.914198 | 1.682068  |
| 14               | 6                | 0              | -6.946780               | -4.669137 | 0.674409  |
| 15               | 6                | 0              | -10.387272              | -4.872727 | -3.402911 |
| 16               | 6                | 0              | -10.233895              | 2.452012  | 2.677374  |
| 17               | 6                | 0              | -9.777661               | 1.463279  | 1.830497  |
| 18               | 6                | 0              | -8.927756               | 1.760121  | 0.738314  |
| 19               | 6                | 0              | -8.539304               | 3.119065  | 0.528439  |
| 20               | 6                | 0              | -9.030904               | 4.103968  | 1.415202  |
| 21               | 6                | 0              | -9.865659               | 3.800982  | 2.479635  |
| 22               | 6                | 0              | -8.479893               | 0.726530  | -0.176982 |
| 23               | 6                | 0              | -7.641320               | 3.446183  | -0.572515 |
| 24               | 6                | 0              | -7.384482               | 2.439307  | -1.544939 |
| 25               | 6                | 0              | -7.830485               | 1.101452  | -1.324496 |
| 26               | 6                | 0              | -6.539237               | 2.741266  | -2.636723 |
| 27               | 6                | 0              | -5.866454               | 3.939251  | -2.702511 |
| 28               | 6                | 0              | -6.011826               | 4.915717  | -1.682009 |
| 29               | 6                | 0              | -6.945393               | 4.670970  | -0.674311 |
| 30               | 6                | 0              | -10.385865              | 4.875718  | 3.402995  |
| 31               | 6                | 0              | 10.302232               | -1.422378 | -3.448440 |
| 32               | 6                | 0              | 9.941199                | -0.779571 | -2.281754 |
| 33               | 6                | 0              | 9.110904                | -1.403253 | -1.320499 |
| 34               | 6                | 0              | 8.651716                | -2.729594 | -1.582016 |
| 35               | 6                | 0              | 9.041071                | -3.355496 | -2.787676 |
| 36               | 6                | 0              | 9.851689                | -2.731813 | -3.723587 |
| 37               | 6                | 0              | 8.751461                | -0.743134 | -0.075554 |
| 38               | 6                | 0              | 7.800633                | -3.398589 | -0.606943 |
| 39               | 6                | 0              | 7.688180                | -2.819981 | 0.687899  |
| 40               | 6                | 0              | 8.171572                | -1.494983 | 0.915920  |
| 41               | 6                | 0              | 6.933375                | -3.493384 | 1.676916  |
| 42               | 6                | 0              | 6.190448                | -4.610083 | 1.363494  |
| 43               | 6                | 0              | 6.158358                | -5.105626 | 0.035127  |
| 44               | 6                | 0              | 7.011605                | -4.530209 | -0.905555 |
| 45               | 6                | 0              | 10.263125               | -3.428069 | -4.998024 |
| 46               | 6                | 0              | 10.302510               | 1.419545  | 3.448733  |
| 47               | 6                | 0              | 9.941345                | 0.776824  | 2.282040  |

|     |   |   |           |            |           |
|-----|---|---|-----------|------------|-----------|
| 48  | 6 | 0 | 9.111251  | 1.400721   | 1.320750  |
| 49  | 6 | 0 | 8.652428  | 2.727195   | 1.582228  |
| 50  | 6 | 0 | 9.041907  | 3.353003   | 2.787896  |
| 51  | 6 | 0 | 9.852313  | 2.729106   | 3.723848  |
| 52  | 6 | 0 | 8.751667  | 0.740685   | 0.075797  |
| 53  | 6 | 0 | 7.801578  | 3.396420   | 0.607106  |
| 54  | 6 | 0 | 7.689020  | 2.817827   | -0.687733 |
| 55  | 6 | 0 | 8.172047  | 1.492688   | -0.915715 |
| 56  | 6 | 0 | 6.934454  | 3.491429   | -1.676793 |
| 57  | 6 | 0 | 6.191833  | 4.608348   | -1.363421 |
| 58  | 6 | 0 | 6.159828  | 5.103924   | -0.035067 |
| 59  | 6 | 0 | 7.012869  | 4.528274   | 0.905664  |
| 60  | 6 | 0 | 10.263877 | 3.425255   | 4.998302  |
| 61  | 6 | 0 | 1.840149  | 10.797849  | -2.789208 |
| 62  | 6 | 0 | 1.019846  | 10.181587  | -1.866184 |
| 63  | 6 | 0 | 1.497458  | 9.151367   | -1.021797 |
| 64  | 6 | 0 | 2.869031  | 8.766642   | -1.134475 |
| 65  | 6 | 0 | 3.677119  | 9.418443   | -2.093430 |
| 66  | 6 | 0 | 3.193343  | 10.418604  | -2.922549 |
| 67  | 6 | 0 | 0.642673  | 8.513676   | -0.032213 |
| 68  | 6 | 0 | 3.400905  | 7.729314   | -0.259498 |
| 69  | 6 | 0 | 2.602523  | 7.319371   | 0.844114  |
| 70  | 6 | 0 | 1.234509  | 7.719790   | 0.918630  |
| 71  | 6 | 0 | 3.127093  | 6.381342   | 1.763161  |
| 72  | 6 | 0 | 4.334275  | 5.762227   | 1.531111  |
| 73  | 6 | 0 | 5.074480  | 6.041364   | 0.353689  |
| 74  | 6 | 0 | 4.621984  | 7.057010   | -0.487744 |
| 75  | 6 | 0 | 4.082848  | 11.106074  | -3.929650 |
| 76  | 6 | 0 | -2.099273 | 9.067177   | 3.376948  |
| 77  | 6 | 0 | -1.275346 | 9.048972   | 2.269799  |
| 78  | 6 | 0 | -1.701339 | 8.494991   | 1.039223  |
| 79  | 6 | 0 | -3.023133 | 7.963585   | 0.960625  |
| 80  | 6 | 0 | -3.837258 | 7.996043   | 2.115193  |
| 81  | 6 | 0 | -3.403305 | 8.529648   | 3.318751  |
| 82  | 6 | 0 | -0.844491 | 8.486305   | -0.137812 |
| 83  | 6 | 0 | -3.504546 | 7.423122   | -0.303065 |
| 84  | 6 | 0 | -2.744928 | 7.691070   | -1.474542 |
| 85  | 6 | 0 | -1.417871 | 8.207768   | -1.354606 |
| 86  | 6 | 0 | -3.257996 | 7.273956   | -2.725733 |
| 87  | 6 | 0 | -4.387619 | 6.490533   | -2.805345 |
| 88  | 6 | 0 | -5.049764 | 6.047062   | -1.630157 |
| 89  | 6 | 0 | -4.626133 | 6.574312   | -0.409574 |
| 90  | 6 | 0 | -4.296333 | 8.560038   | 4.535148  |
| 91  | 6 | 0 | -2.101824 | -9.066202  | -3.377291 |
| 92  | 6 | 0 | -1.277902 | -9.048350  | -2.270136 |
| 93  | 6 | 0 | -1.703760 | -8.494408  | -1.039492 |
| 94  | 6 | 0 | -3.025408 | -7.962647  | -0.960840 |
| 95  | 6 | 0 | -3.839532 | -7.994748  | -2.115422 |
| 96  | 6 | 0 | -3.405719 | -8.528339  | -3.319034 |
| 97  | 6 | 0 | -0.846914 | -8.486068  | 0.137540  |
| 98  | 6 | 0 | -3.506671 | -7.422175  | 0.302902  |
| 99  | 6 | 0 | -2.747118 | -7.690428  | 1.474354  |
| 100 | 6 | 0 | -1.420208 | -8.207482  | 1.354364  |
| 101 | 6 | 0 | -3.260064 | -7.273280  | 2.725584  |
| 102 | 6 | 0 | -4.389469 | -6.489553  | 2.805271  |
| 103 | 6 | 0 | -5.051506 | -6.045808  | 1.630124  |
| 104 | 6 | 0 | -4.628034 | -6.573079  | 0.409497  |
| 105 | 6 | 0 | -4.298799 | -8.558493  | -4.535398 |
| 106 | 6 | 0 | 1.837042  | -10.798577 | 2.788773  |

|     |   |   |            |            |           |
|-----|---|---|------------|------------|-----------|
| 107 | 6 | 0 | 1.016917   | -10.181992 | 1.865806  |
| 108 | 6 | 0 | 1.494827   | -9.151821  | 1.021530  |
| 109 | 6 | 0 | 2.866501   | -8.767478  | 1.134270  |
| 110 | 6 | 0 | 3.674393   | -9.419585  | 2.093182  |
| 111 | 6 | 0 | 3.190325   | -10.419683 | 2.922207  |
| 112 | 6 | 0 | 0.640246   | -8.513837  | 0.031961  |
| 113 | 6 | 0 | 3.398685   | -7.730249  | 0.259363  |
| 114 | 6 | 0 | 2.600445   | -7.320019  | -0.844243 |
| 115 | 6 | 0 | 1.232320   | -7.720052  | -0.918816 |
| 116 | 6 | 0 | 3.125298   | -6.382084  | -1.763226 |
| 117 | 6 | 0 | 4.332652   | -5.763326  | -1.531114 |
| 118 | 6 | 0 | 5.072750   | -6.042738  | -0.353690 |
| 119 | 6 | 0 | 4.619947   | -7.058298  | 0.487680  |
| 120 | 6 | 0 | 4.079524   | -11.107206 | 3.929541  |
| 121 | 1 | 0 | -6.363795  | -1.975900  | 3.389718  |
| 122 | 1 | 0 | -5.151193  | -4.096396  | 3.500691  |
| 123 | 1 | 0 | -7.089218  | -5.420254  | -0.094239 |
| 124 | 1 | 0 | -7.506076  | -0.338076  | 2.028065  |
| 125 | 1 | 0 | -10.084288 | -0.431621  | -1.986076 |
| 126 | 1 | 0 | -10.897376 | -2.189996  | -3.499154 |
| 127 | 1 | 0 | -8.771415  | -5.141431  | -1.245441 |
| 128 | 1 | 0 | -10.076434 | -4.691338  | -4.438554 |
| 129 | 1 | 0 | -10.023529 | -5.862045  | -3.112771 |
| 130 | 1 | 0 | -11.483061 | -4.904234  | -3.399908 |
| 131 | 1 | 0 | -5.150044  | 4.097592   | -3.500616 |
| 132 | 1 | 0 | -7.087585  | 5.422160   | 0.094311  |
| 133 | 1 | 0 | -6.363282  | 1.977457   | -3.389537 |
| 134 | 1 | 0 | -7.506037  | 0.340035   | -2.027822 |
| 135 | 1 | 0 | -8.769750  | 5.143844   | 1.245652  |
| 136 | 1 | 0 | -10.083988 | 0.434442   | 1.986471  |
| 137 | 1 | 0 | -10.896438 | 2.193092   | 3.499575  |
| 138 | 1 | 0 | -10.077943 | 4.692645   | 4.439197  |
| 139 | 1 | 0 | -10.019335 | 5.864539   | 3.114671  |
| 140 | 1 | 0 | -11.481587 | 4.909604   | 3.397355  |
| 141 | 1 | 0 | 6.879543   | -3.066825  | 2.675060  |
| 142 | 1 | 0 | 5.541364   | -5.053318  | 2.111902  |
| 143 | 1 | 0 | 7.006153   | -4.921802  | -1.917247 |
| 144 | 1 | 0 | 7.917297   | -1.027849  | 1.862229  |
| 145 | 1 | 0 | 10.313148  | 0.219151   | -2.079939 |
| 146 | 1 | 0 | 10.954261  | -0.920493  | -4.159078 |
| 147 | 1 | 0 | 8.722996   | -4.375931  | -2.977107 |
| 148 | 1 | 0 | 9.899461   | -2.888595  | -5.880619 |
| 149 | 1 | 0 | 11.354182  | -3.485354  | -5.086429 |
| 150 | 1 | 0 | 9.869237   | -4.446845  | -5.043589 |
| 151 | 1 | 0 | 5.542906   | 5.051751   | -2.111866 |
| 152 | 1 | 0 | 7.007494   | 4.919892   | 1.917347  |
| 153 | 1 | 0 | 6.880540   | 3.064871   | -2.674932 |
| 154 | 1 | 0 | 7.917687   | 1.025616   | -1.862032 |
| 155 | 1 | 0 | 8.724110   | 4.373529   | 2.977305  |
| 156 | 1 | 0 | 10.313030  | -0.222000  | 2.080246  |
| 157 | 1 | 0 | 10.954377  | 0.917493   | 4.159402  |
| 158 | 1 | 0 | 9.870441   | 4.444212   | 5.043748  |
| 159 | 1 | 0 | 9.899836   | 2.886001   | 5.880878  |
| 160 | 1 | 0 | 11.354945  | 3.482050   | 5.086866  |
| 161 | 1 | 0 | 2.525024   | 6.096738   | 2.622033  |
| 162 | 1 | 0 | 4.675631   | 4.979340   | 2.200456  |
| 163 | 1 | 0 | 5.197774   | 7.285563   | -1.378424 |
| 164 | 1 | 0 | 0.621420   | 7.249284   | 1.680350  |
| 165 | 1 | 0 | -0.011218  | 10.502540  | -1.765105 |



|     |   |   |           |            |           |
|-----|---|---|-----------|------------|-----------|
| 166 | 1 | 0 | 1.443717  | 11.595880  | -3.412128 |
| 167 | 1 | 0 | 4.727059  | 9.152134   | -2.164483 |
| 168 | 1 | 0 | 3.705131  | 10.971682  | -4.950096 |
| 169 | 1 | 0 | 4.131207  | 12.185914  | -3.747110 |
| 170 | 1 | 0 | 5.103125  | 10.714814  | -3.896679 |
| 171 | 1 | 0 | -4.745910 | 6.171237   | -3.778375 |
| 172 | 1 | 0 | -5.100595 | 6.226745   | 0.500783  |
| 173 | 1 | 0 | -2.715636 | 7.539281   | -3.629478 |
| 174 | 1 | 0 | -0.805910 | 8.220565   | -2.251002 |
| 175 | 1 | 0 | -4.854447 | 7.622154   | 2.051504  |
| 176 | 1 | 0 | -0.283683 | 9.483767   | 2.330992  |
| 177 | 1 | 0 | -1.745468 | 9.514415   | 4.302605  |
| 178 | 1 | 0 | -5.289218 | 8.159546   | 4.313780  |
| 179 | 1 | 0 | -3.871832 | 7.967183   | 5.354061  |
| 180 | 1 | 0 | -4.421880 | 9.581477   | 4.912363  |
| 181 | 1 | 0 | -2.717766 | -7.538827  | 3.629301  |
| 182 | 1 | 0 | -4.747664 | -6.170243  | 3.778332  |
| 183 | 1 | 0 | -5.102416 | -6.225311  | -0.500826 |
| 184 | 1 | 0 | -0.808238 | -8.220533  | 2.250751  |
| 185 | 1 | 0 | -0.286350 | -9.483392  | -2.331373 |
| 186 | 1 | 0 | -1.748121 | -9.513397  | -4.303009 |
| 187 | 1 | 0 | -4.856614 | -7.620574  | -2.051709 |
| 188 | 1 | 0 | -3.873414 | -7.967065  | -5.354877 |
| 189 | 1 | 0 | -4.425903 | -9.580102  | -4.911645 |
| 190 | 1 | 0 | -5.291079 | -8.156310  | -4.314386 |
| 191 | 1 | 0 | 4.674249  | -4.980501  | -2.200410 |
| 192 | 1 | 0 | 5.195644  | -7.287056  | 1.378367  |
| 193 | 1 | 0 | 2.523328  | -6.097263  | -2.622094 |
| 194 | 1 | 0 | 0.619378  | -7.249331  | -1.680521 |
| 195 | 1 | 0 | 4.724412  | -9.153590  | 2.164250  |
| 196 | 1 | 0 | -0.014221 | -10.502680 | 1.764644  |
| 197 | 1 | 0 | 1.440401  | -11.596605 | 3.411565  |
| 198 | 1 | 0 | 5.100868  | -10.718975 | 3.893895  |
| 199 | 1 | 0 | 3.703936  | -10.969070 | 4.950291  |
| 200 | 1 | 0 | 4.124398  | -12.187633 | 3.749713  |

**Table S6.** Cartesian coordinate of *E,R,E,R,E,R,Z,R* (4)

SCF Done: E(RB3LYP) = -4621.34592255 A.U. after 6 cycles

| Center<br>Number | Atomic<br>Number | Atomic<br>Type | Coordinates (Angstroms) |           |           |
|------------------|------------------|----------------|-------------------------|-----------|-----------|
|                  |                  |                | X                       | Y         | Z         |
| 1                | 6                | 0              | -10.787116              | 2.506245  | -3.099380 |
| 2                | 6                | 0              | -10.274779              | 1.586704  | -2.206615 |
| 3                | 6                | 0              | -9.275327               | 1.942398  | -1.270452 |
| 4                | 6                | 0              | -8.805526               | 3.291345  | -1.261581 |
| 5                | 6                | 0              | -9.352407               | 4.203910  | -2.191568 |
| 6                | 6                | 0              | -10.327415              | 3.840981  | -3.108095 |
| 7                | 6                | 0              | -8.751154               | 0.984424  | -0.309731 |
| 8                | 6                | 0              | -7.784287               | 3.690060  | -0.301022 |
| 9                | 6                | 0              | -7.496184               | 2.798375  | 0.769138  |
| 10               | 6                | 0              | -7.991720               | 1.459785  | 0.730716  |
| 11               | 6                | 0              | -6.568200               | 3.192539  | 1.760971  |
| 12               | 6                | 0              | -5.837621               | 4.351454  | 1.625842  |
| 13               | 6                | 0              | -5.993590               | 5.175721  | 0.481929  |
| 14               | 6                | 0              | -7.006217               | 4.861777  | -0.424618 |
| 15               | 6                | 0              | -10.903440              | 4.839797  | -4.082238 |
| 16               | 6                | 0              | -9.656891               | -2.022400 | 2.795934  |

|    |   |   |           |           |           |
|----|---|---|-----------|-----------|-----------|
| 17 | 6 | 0 | -9.530693 | -1.106276 | 1.771219  |
| 18 | 6 | 0 | -8.890461 | -1.441736 | 0.554893  |
| 19 | 6 | 0 | -8.378390 | -2.764972 | 0.403570  |
| 20 | 6 | 0 | -8.521878 | -3.674881 | 1.474958  |
| 21 | 6 | 0 | -9.145866 | -3.331963 | 2.664601  |
| 22 | 6 | 0 | -8.772327 | -0.488915 | -0.538523 |
| 23 | 6 | 0 | -7.727868 | -3.141724 | -0.843594 |
| 24 | 6 | 0 | -7.888921 | -2.281066 | -1.963961 |
| 25 | 6 | 0 | -8.411946 | -0.964312 | -1.775803 |
| 26 | 6 | 0 | -7.337425 | -2.670428 | -3.208226 |
| 27 | 6 | 0 | -6.510327 | -3.766986 | -3.303116 |
| 28 | 6 | 0 | -6.178925 | -4.525776 | -2.150512 |
| 29 | 6 | 0 | -6.851883 | -4.242465 | -0.962504 |
| 30 | 6 | 0 | -9.298621 | -4.326487 | 3.789659  |
| 31 | 6 | 0 | 11.076155 | 0.913170  | 2.491171  |
| 32 | 6 | 0 | 10.493191 | 0.211423  | 1.455752  |
| 33 | 6 | 0 | 9.465825  | 0.776621  | 0.663513  |
| 34 | 6 | 0 | 9.048808  | 2.113279  | 0.949914  |
| 35 | 6 | 0 | 9.667741  | 2.798880  | 2.019886  |
| 36 | 6 | 0 | 10.664577 | 2.228559  | 2.796159  |
| 37 | 6 | 0 | 8.863909  | 0.048202  | -0.442251 |
| 38 | 6 | 0 | 8.014717  | 2.737099  | 0.133337  |
| 39 | 6 | 0 | 7.631172  | 2.079215  | -1.068198 |
| 40 | 6 | 0 | 8.063549  | 0.741743  | -1.315563 |
| 41 | 6 | 0 | 6.695048  | 2.701427  | -1.926324 |
| 42 | 6 | 0 | 6.060459  | 3.865568  | -1.556957 |
| 43 | 6 | 0 | 6.320605  | 4.461356  | -0.296330 |
| 44 | 6 | 0 | 7.326220  | 3.914858  | 0.499927  |
| 45 | 6 | 0 | 11.313643 | 2.988424  | 3.927392  |
| 46 | 6 | 0 | 9.572444  | -2.170464 | -4.185553 |
| 47 | 6 | 0 | 9.504314  | -1.510264 | -2.975507 |
| 48 | 6 | 0 | 8.940874  | -2.121187 | -1.830009 |
| 49 | 6 | 0 | 8.450671  | -3.455844 | -1.950087 |
| 50 | 6 | 0 | 8.531865  | -4.098868 | -3.205896 |
| 51 | 6 | 0 | 9.077031  | -3.485438 | -4.323044 |
| 52 | 6 | 0 | 8.882184  | -1.439509 | -0.545190 |
| 53 | 6 | 0 | 7.896294  | -4.122574 | -0.780632 |
| 54 | 6 | 0 | 8.119850  | -3.530227 | 0.491971  |
| 55 | 6 | 0 | 8.601058  | -2.186931 | 0.572586  |
| 56 | 6 | 0 | 7.689171  | -4.224618 | 1.648267  |
| 57 | 6 | 0 | 6.922509  | -5.363495 | 1.547865  |
| 58 | 6 | 0 | 6.509794  | -5.851703 | 0.279729  |
| 59 | 6 | 0 | 7.066261  | -5.261649 | -0.855181 |
| 60 | 6 | 0 | 9.162572  | -4.197989 | -5.650815 |
| 61 | 6 | 0 | -0.066151 | -6.816928 | 3.734999  |
| 62 | 6 | 0 | -0.339506 | -7.263702 | 2.459058  |
| 63 | 6 | 0 | 0.695093  | -7.530009 | 1.528099  |
| 64 | 6 | 0 | 2.036067  | -7.252263 | 1.925214  |
| 65 | 6 | 0 | 2.280150  | -6.815801 | 3.247925  |
| 66 | 6 | 0 | 1.262010  | -6.602909 | 4.162218  |
| 67 | 6 | 0 | 0.431579  | -8.031364 | 0.186081  |
| 68 | 6 | 0 | 3.109876  | -7.375080 | 0.951452  |
| 69 | 6 | 0 | 2.841167  | -8.012418 | -0.289616 |
| 70 | 6 | 0 | 1.488712  | -8.338985 | -0.631085 |
| 71 | 6 | 0 | 3.902221  | -8.159028 | -1.217245 |
| 72 | 6 | 0 | 5.131759  | -7.572031 | -0.999396 |
| 73 | 6 | 0 | 5.364318  | -6.790133 | 0.161793  |
| 74 | 6 | 0 | 4.365893  | -6.763453 | 1.133814  |
| 75 | 6 | 0 | 1.548612  | -6.151381 | 5.573294  |

|     |   |   |            |            |           |
|-----|---|---|------------|------------|-----------|
| 76  | 6 | 0 | -3.010840  | -10.550631 | 1.414478  |
| 77  | 6 | 0 | -1.927472  | -9.826093  | 0.962858  |
| 78  | 6 | 0 | -2.092760  | -8.705412  | 0.115118  |
| 79  | 6 | 0 | -3.416536  | -8.328149  | -0.270247 |
| 80  | 6 | 0 | -4.500555  | -9.095961  | 0.213237  |
| 81  | 6 | 0 | -4.326175  | -10.193777 | 1.042039  |
| 82  | 6 | 0 | -0.952063  | -7.960572  | -0.380183 |
| 83  | 6 | 0 | -3.610597  | -7.176844  | -1.144465 |
| 84  | 6 | 0 | -2.461687  | -6.623659  | -1.775901 |
| 85  | 6 | 0 | -1.156416  | -7.034485  | -1.367243 |
| 86  | 6 | 0 | -2.619900  | -5.559108  | -2.690079 |
| 87  | 6 | 0 | -3.847336  | -4.969205  | -2.879474 |
| 88  | 6 | 0 | -4.984249  | -5.408897  | -2.152348 |
| 89  | 6 | 0 | -4.856102  | -6.536844  | -1.342553 |
| 90  | 6 | 0 | -5.501460  | -11.005460 | 1.530385  |
| 91  | 6 | 0 | -0.918896  | 9.652603   | 4.015988  |
| 92  | 6 | 0 | -0.303881  | 9.340097   | 2.820915  |
| 93  | 6 | 0 | -0.993360  | 8.657633   | 1.790491  |
| 94  | 6 | 0 | -2.357539  | 8.297954   | 2.012181  |
| 95  | 6 | 0 | -2.953374  | 8.634696   | 3.248762  |
| 96  | 6 | 0 | -2.265403  | 9.299509   | 4.251950  |
| 97  | 6 | 0 | -0.359714  | 8.353620   | 0.517901  |
| 98  | 6 | 0 | -3.093845  | 7.598053   | 0.967524  |
| 99  | 6 | 0 | -2.512940  | 7.534210   | -0.329626 |
| 100 | 6 | 0 | -1.149796  | 7.918052   | -0.516300 |
| 101 | 6 | 0 | -3.240738  | 6.924335   | -1.378123 |
| 102 | 6 | 0 | -4.427084  | 6.270254   | -1.131008 |
| 103 | 6 | 0 | -4.945448  | 6.186837   | 0.186772  |
| 104 | 6 | 0 | -4.302292  | 6.904400   | 1.194780  |
| 105 | 6 | 0 | -2.930121  | 9.657461   | 5.558953  |
| 106 | 6 | 0 | 1.888090   | 10.137822  | -2.831100 |
| 107 | 6 | 0 | 1.224260   | 9.685411   | -1.709142 |
| 108 | 6 | 0 | 1.803400   | 8.727450   | -0.843099 |
| 109 | 6 | 0 | 3.108022   | 8.236601   | -1.152834 |
| 110 | 6 | 0 | 3.756269   | 8.722557   | -2.310879 |
| 111 | 6 | 0 | 3.175494   | 9.656697   | -3.154513 |
| 112 | 6 | 0 | 1.121121   | 8.268861   | 0.356056  |
| 113 | 6 | 0 | 3.733775   | 7.257491   | -0.273823 |
| 114 | 6 | 0 | 3.136756   | 7.021487   | 0.995961  |
| 115 | 6 | 0 | 1.834096   | 7.538713   | 1.273692  |
| 116 | 6 | 0 | 3.769956   | 6.134411   | 1.898010  |
| 117 | 6 | 0 | 4.869485   | 5.398035   | 1.515448  |
| 118 | 6 | 0 | 5.386496   | 5.505107   | 0.199406  |
| 119 | 6 | 0 | 4.845844   | 6.472069   | -0.646771 |
| 120 | 6 | 0 | 3.894898   | 10.166065  | -4.379694 |
| 121 | 1 | 0 | -6.376394  | 2.522269   | 2.594646  |
| 122 | 1 | 0 | -5.060606  | 4.583930   | 2.346594  |
| 123 | 1 | 0 | -7.145680  | 5.501575   | -1.289485 |
| 124 | 1 | 0 | -7.608016  | 0.767254   | 1.472878  |
| 125 | 1 | 0 | -10.655223 | 0.570871   | -2.202391 |
| 126 | 1 | 0 | -11.565315 | 2.203782   | -3.795777 |
| 127 | 1 | 0 | -9.023806  | 5.238334   | -2.169098 |
| 128 | 1 | 0 | -10.471082 | 5.833845   | -3.940487 |
| 129 | 1 | 0 | -10.715026 | 4.537430   | -5.119192 |
| 130 | 1 | 0 | -11.990146 | 4.926821   | -3.967912 |
| 131 | 1 | 0 | -6.060544  | -4.021229  | -4.257872 |
| 132 | 1 | 0 | -6.585821  | -4.799658  | -0.070911 |
| 133 | 1 | 0 | -7.520592  | -2.048688  | -4.080681 |
| 134 | 1 | 0 | -8.343897  | -0.278171  | -2.614127 |

|     |   |   |            |            |           |
|-----|---|---|------------|------------|-----------|
| 135 | 1 | 0 | -8.161146  | -4.691564  | 1.352280  |
| 136 | 1 | 0 | -9.944163  | -0.109953  | 1.885737  |
| 137 | 1 | 0 | -10.168368 | -1.737064  | 3.711905  |
| 138 | 1 | 0 | -8.873522  | -5.298631  | 3.526203  |
| 139 | 1 | 0 | -8.796318  | -3.976949  | 4.699348  |
| 140 | 1 | 0 | -10.353376 | -4.479286  | 4.046245  |
| 141 | 1 | 0 | 6.428418   | 2.206819   | -2.856574 |
| 142 | 1 | 0 | 5.283524   | 4.281151   | -2.190351 |
| 143 | 1 | 0 | 7.539550   | 4.380756   | 1.456027  |
| 144 | 1 | 0 | 7.618922   | 0.224379   | -2.159458 |
| 145 | 1 | 0 | 10.838762  | -0.790105  | 1.223994  |
| 146 | 1 | 0 | 11.872839  | 0.453485   | 3.070849  |
| 147 | 1 | 0 | 9.377622   | 3.824319   | 2.226073  |
| 148 | 1 | 0 | 10.921164  | 4.005854   | 4.004691  |
| 149 | 1 | 0 | 11.143727  | 2.490389   | 4.889383  |
| 150 | 1 | 0 | 12.399086  | 3.056369   | 3.790822  |
| 151 | 1 | 0 | 6.585632   | -5.862529  | 2.450620  |
| 152 | 1 | 0 | 6.750014   | -5.609274  | -1.831972 |
| 153 | 1 | 0 | 7.927949   | -3.813658  | 2.625757  |
| 154 | 1 | 0 | 8.579359   | -1.707841  | 1.546438  |
| 155 | 1 | 0 | 8.187732   | -5.124742  | -3.293639 |
| 156 | 1 | 0 | 9.906099   | -0.506749  | -2.887476 |
| 157 | 1 | 0 | 10.026061  | -1.677323  | -5.041761 |
| 158 | 1 | 0 | 10.197827  | -4.256015  | -6.006411 |
| 159 | 1 | 0 | 8.773144   | -5.217414  | -5.585079 |
| 160 | 1 | 0 | 8.589366   | -3.670006  | -6.422095 |
| 161 | 1 | 0 | 3.717360   | -8.700741  | -2.141414 |
| 162 | 1 | 0 | 5.914198   | -7.674723  | -1.745002 |
| 163 | 1 | 0 | 4.509703   | -6.136769  | 2.004454  |
| 164 | 1 | 0 | 1.293098   | -8.734530  | -1.624369 |
| 165 | 1 | 0 | -1.369204  | -7.423424  | 2.167246  |
| 166 | 1 | 0 | -0.886452  | -6.634191  | 4.424772  |
| 167 | 1 | 0 | 3.304606   | -6.659100  | 3.569999  |
| 168 | 1 | 0 | 1.059466   | -5.194775  | 5.791433  |
| 169 | 1 | 0 | 1.174805   | -6.875310  | 6.306880  |
| 170 | 1 | 0 | 2.621075   | -6.025379  | 5.744317  |
| 171 | 1 | 0 | -3.928231  | -4.096049  | -3.517580 |
| 172 | 1 | 0 | -5.729552  | -6.891006  | -0.805184 |
| 173 | 1 | 0 | -1.740384  | -5.161926  | -3.189737 |
| 174 | 1 | 0 | -0.306757  | -6.490618  | -1.769549 |
| 175 | 1 | 0 | -5.508520  | -8.838998  | -0.097418 |
| 176 | 1 | 0 | -0.921376  | -10.117822 | 1.247595  |
| 177 | 1 | 0 | -2.852456  | -11.413605 | 2.056469  |
| 178 | 1 | 0 | -6.447758  | -10.608806 | 1.153003  |
| 179 | 1 | 0 | -5.424380  | -12.050793 | 1.209253  |
| 180 | 1 | 0 | -5.553010  | -11.011514 | 2.625533  |
| 181 | 1 | 0 | -2.807847  | 6.907381   | -2.374842 |
| 182 | 1 | 0 | -4.917337  | 5.725554   | -1.931344 |
| 183 | 1 | 0 | -4.707885  | 6.861816   | 2.199899  |
| 184 | 1 | 0 | -0.699250  | 7.707230   | -1.481288 |
| 185 | 1 | 0 | 0.725553   | 9.636701   | 2.651706  |
| 186 | 1 | 0 | -0.364738  | 10.190589  | 4.781188  |
| 187 | 1 | 0 | -3.999114  | 8.393839   | 3.412172  |
| 188 | 1 | 0 | -3.977999  | 9.346211   | 5.574511  |
| 189 | 1 | 0 | -2.425464  | 9.177489   | 6.405788  |
| 190 | 1 | 0 | -2.897965  | 10.738168  | 5.739542  |
| 191 | 1 | 0 | 5.284227   | 4.656365   | 2.190666  |
| 192 | 1 | 0 | 5.254287   | 6.569596   | -1.646972 |
| 193 | 1 | 0 | 3.327734   | 5.982018   | 2.879031  |

|     |   |   |          |           |           |
|-----|---|---|----------|-----------|-----------|
| 194 | 1 | 0 | 1.348796 | 7.206790  | 2.186404  |
| 195 | 1 | 0 | 4.760830 | 8.378213  | -2.535211 |
| 196 | 1 | 0 | 0.243760 | 10.081137 | -1.467605 |
| 197 | 1 | 0 | 1.420848 | 10.885331 | -3.467455 |
| 198 | 1 | 0 | 4.895756 | 9.734714  | -4.465419 |
| 199 | 1 | 0 | 3.344251 | 9.918644  | -5.295059 |
| 200 | 1 | 0 | 3.999850 | 11.256882 | -4.355695 |

**Table S7.** Cartesian coordinate of Z,R,Z,S,Z,R,Z,S (5)

SCF Done: E(RB3LYP) = -4621.34463867 A.U. after 8 cycles

| Center<br>Number | Atomic<br>Number | Atomic<br>Type | Coordinates (Angstroms) |            |           |
|------------------|------------------|----------------|-------------------------|------------|-----------|
|                  |                  |                | X                       | Y          | Z         |
| 1                | 6                | 0              | -3.615586               | -10.417127 | -1.313427 |
| 2                | 6                | 0              | -2.558522               | -9.864557  | -0.619634 |
| 3                | 6                | 0              | -2.726522               | -8.723749  | 0.200606  |
| 4                | 6                | 0              | -4.032445               | -8.150112  | 0.305586  |
| 5                | 6                | 0              | -5.089099               | -8.745003  | -0.420445 |
| 6                | 6                | 0              | -4.909304               | -9.858879  | -1.225899 |
| 7                | 6                | 0              | -1.620528               | -8.159227  | 0.955844  |
| 8                | 6                | 0              | -4.241556               | -6.979550  | 1.150314  |
| 9                | 6                | 0              | -3.184951               | -6.597480  | 2.022966  |
| 10               | 6                | 0              | -1.900659               | -7.204310  | 1.900344  |
| 11               | 6                | 0              | -3.373864               | -5.503288  | 2.896989  |
| 12               | 6                | 0              | -4.510038               | -4.732279  | 2.828945  |
| 13               | 6                | 0              | -5.525903               | -5.014696  | 1.878355  |
| 14               | 6                | 0              | -5.395456               | -6.165068  | 1.099247  |
| 15               | 6                | 0              | -6.059879               | -10.478438 | -1.981329 |
| 16               | 1                | 0              | -2.571267               | -5.232295  | 3.577688  |
| 17               | 1                | 0              | -4.586860               | -3.844305  | 3.446266  |
| 18               | 1                | 0              | -6.181020               | -6.401376  | 0.389732  |
| 19               | 1                | 0              | -1.092765               | -6.780743  | 2.488153  |
| 20               | 1                | 0              | -1.576190               | -10.320225 | -0.682444 |
| 21               | 1                | 0              | -3.454558               | -11.302205 | -1.923961 |
| 22               | 1                | 0              | -6.089827               | -8.335772  | -0.324046 |
| 23               | 1                | 0              | -6.197146               | -11.530439 | -1.705624 |
| 24               | 1                | 0              | -6.998898               | -9.955079  | -1.782268 |
| 25               | 1                | 0              | -5.884679               | -10.452566 | -3.063401 |
| 26               | 6                | 0              | 1.526574                | -9.007924  | 3.917517  |
| 27               | 6                | 0              | 0.543758                | -8.903865  | 2.954106  |
| 28               | 6                | 0              | 0.840118                | -8.471071  | 1.639828  |
| 29               | 6                | 0              | 2.193096                | -8.147854  | 1.324800  |
| 30               | 6                | 0              | 3.172297                | -8.261945  | 2.337089  |
| 31               | 6                | 0              | 2.868252                | -8.681352  | 3.622909  |
| 32               | 6                | 0              | -0.185951               | -8.379360  | 0.611635  |
| 33               | 6                | 0              | 2.528927                | -7.718600  | -0.025050 |
| 34               | 6                | 0              | 1.561482                | -7.917834  | -1.048130 |
| 35               | 6                | 0              | 0.214033                | -8.241322  | -0.694844 |
| 36               | 6                | 0              | 1.910161                | -7.599561  | -2.382558 |
| 37               | 6                | 0              | 3.090637                | -6.952224  | -2.672060 |
| 38               | 6                | 0              | 3.978978                | -6.562676  | -1.635100 |
| 39               | 6                | 0              | 3.710810                | -7.016680  | -0.343912 |
| 40               | 6                | 0              | 3.934481                | -8.807096  | 4.683788  |
| 41               | 1                | 0              | 3.318381                | -6.689928  | -3.700244 |
| 42               | 1                | 0              | 4.365393                | -6.706203  | 0.462795  |
| 43               | 1                | 0              | 1.201042                | -7.818850  | -3.176534 |
| 44               | 1                | 0              | -0.532390               | -8.199184  | -1.482238 |

|     |   |   |           |           |           |
|-----|---|---|-----------|-----------|-----------|
| 45  | 1 | 0 | 4.207962  | -8.046756 | 2.092504  |
| 46  | 1 | 0 | -0.478279 | -9.174114 | 3.196590  |
| 47  | 1 | 0 | 1.267728  | -9.359093 | 4.913356  |
| 48  | 1 | 0 | 4.922898  | -8.554050 | 4.291095  |
| 49  | 1 | 0 | 3.731114  | -8.142359 | 5.531689  |
| 50  | 1 | 0 | 3.981993  | -9.827174 | 5.082284  |
| 51  | 6 | 0 | -1.526519 | 9.007492  | 3.917660  |
| 52  | 6 | 0 | -0.543728 | 8.903454  | 2.954220  |
| 53  | 6 | 0 | -0.840143 | 8.470765  | 1.639926  |
| 54  | 6 | 0 | -2.193154 | 8.147687  | 1.324889  |
| 55  | 6 | 0 | -3.172334 | 8.261801  | 2.337182  |
| 56  | 6 | 0 | -2.868233 | 8.681044  | 3.623045  |
| 57  | 6 | 0 | 0.185878  | 8.379137  | 0.611687  |
| 58  | 6 | 0 | -2.529048 | 7.718609  | -0.024995 |
| 59  | 6 | 0 | -1.561597 | 7.917857  | -1.048065 |
| 60  | 6 | 0 | -0.214134 | 8.241232  | -0.694771 |
| 61  | 6 | 0 | -1.910278 | 7.599683  | -2.382510 |
| 62  | 6 | 0 | -3.090782 | 6.952434  | -2.672064 |
| 63  | 6 | 0 | -3.979194 | 6.562937  | -1.635145 |
| 64  | 6 | 0 | -3.710995 | 7.016821  | -0.343914 |
| 65  | 6 | 0 | -3.934446 | 8.806816  | 4.683933  |
| 66  | 1 | 0 | -1.201129 | 7.818958  | -3.176464 |
| 67  | 1 | 0 | -3.318502 | 6.690165  | -3.700261 |
| 68  | 1 | 0 | -4.365599 | 6.706319  | 0.462774  |
| 69  | 1 | 0 | 0.532271  | 8.199111  | -1.482183 |
| 70  | 1 | 0 | 0.478339  | 9.173606  | 3.196714  |
| 71  | 1 | 0 | -1.267629 | 9.358569  | 4.913521  |
| 72  | 1 | 0 | -4.208029 | 8.046766  | 2.092568  |
| 73  | 1 | 0 | -3.731132 | 8.142020  | 5.531800  |
| 74  | 1 | 0 | -3.981889 | 9.826877  | 5.082483  |
| 75  | 1 | 0 | -4.922880 | 8.553861  | 4.291223  |
| 76  | 6 | 0 | 3.615521  | 10.417841 | -1.312570 |
| 77  | 6 | 0 | 2.558456  | 9.864990  | -0.619007 |
| 78  | 6 | 0 | 2.726450  | 8.723870  | 0.200808  |
| 79  | 6 | 0 | 4.032391  | 8.150238  | 0.305631  |
| 80  | 6 | 0 | 5.089044  | 8.745423  | -0.420164 |
| 81  | 6 | 0 | 4.909251  | 9.859590  | -1.225211 |
| 82  | 6 | 0 | 1.620458  | 8.159039  | 0.955838  |
| 83  | 6 | 0 | 4.241528  | 6.979480  | 1.150098  |
| 84  | 6 | 0 | 3.184900  | 6.597148  | 2.022618  |
| 85  | 6 | 0 | 1.900590  | 7.203901  | 1.900071  |
| 86  | 6 | 0 | 3.373837  | 5.502838  | 2.896479  |
| 87  | 6 | 0 | 4.510100  | 4.731978  | 2.828434  |
| 88  | 6 | 0 | 5.525997  | 5.014640  | 1.877955  |
| 89  | 6 | 0 | 5.395498  | 6.165094  | 1.098971  |
| 90  | 6 | 0 | 6.059843  | 10.479485 | -1.980337 |
| 91  | 1 | 0 | 4.586985  | 3.843926  | 3.445635  |
| 92  | 1 | 0 | 6.181112  | 6.401582  | 0.389567  |
| 93  | 1 | 0 | 2.571213  | 5.231664  | 3.577074  |
| 94  | 1 | 0 | 1.092687  | 6.780125  | 2.487723  |
| 95  | 1 | 0 | 6.089791  | 8.336227  | -0.323840 |
| 96  | 1 | 0 | 1.576138  | 10.320706 | -0.681630 |
| 97  | 1 | 0 | 3.454490  | 11.303149 | -1.922769 |
| 98  | 1 | 0 | 6.998864  | 9.956050  | -1.781483 |
| 99  | 1 | 0 | 5.884668  | 10.454092 | -3.062424 |
| 100 | 1 | 0 | 6.197098  | 11.531365 | -1.704166 |
| 101 | 6 | 0 | 9.007802  | 1.526318  | -3.917956 |
| 102 | 6 | 0 | 8.903834  | 0.543534  | -2.954487 |
| 103 | 6 | 0 | 8.471300  | 0.839995  | -1.640144 |

|     |   |   |           |           |           |
|-----|---|---|-----------|-----------|-----------|
| 104 | 6 | 0 | 8.148105  | 2.192991  | -1.325143 |
| 105 | 6 | 0 | 8.262076  | 3.172142  | -2.337490 |
| 106 | 6 | 0 | 8.681321  | 2.868027  | -3.623356 |
| 107 | 6 | 0 | 8.379764  | -0.185981 | -0.611875 |
| 108 | 6 | 0 | 7.718907  | 2.528880  | 0.024735  |
| 109 | 6 | 0 | 7.918178  | 1.561455  | 1.047831  |
| 110 | 6 | 0 | 8.241682  | 0.214030  | 0.694559  |
| 111 | 6 | 0 | 7.599862  | 1.910116  | 2.382255  |
| 112 | 6 | 0 | 6.952480  | 3.090564  | 2.671740  |
| 113 | 6 | 0 | 6.562975  | 3.978903  | 1.634779  |
| 114 | 6 | 0 | 7.016924  | 3.710751  | 0.343599  |
| 115 | 6 | 0 | 8.807574  | 3.934336  | -4.684098 |
| 116 | 1 | 0 | 7.819126  | 1.200979  | 3.176225  |
| 117 | 1 | 0 | 6.690037  | 3.318296  | 3.699889  |
| 118 | 1 | 0 | 6.706379  | 4.365323  | -0.463094 |
| 119 | 1 | 0 | 8.199503  | -0.532379 | 1.481969  |
| 120 | 1 | 0 | 9.173912  | -0.478560 | -3.196985 |
| 121 | 1 | 0 | 9.358812  | 1.267408  | -4.913836 |
| 122 | 1 | 0 | 8.046967  | 4.207821  | -2.092899 |
| 123 | 1 | 0 | 9.828621  | 3.983982  | -5.079866 |
| 124 | 1 | 0 | 8.145580  | 3.729414  | -5.533741 |
| 125 | 1 | 0 | 8.551441  | 4.922269  | -4.292201 |
| 126 | 6 | 0 | 10.417352 | -3.615402 | 1.313600  |
| 127 | 6 | 0 | 9.864941  | -2.558448 | 0.619540  |
| 128 | 6 | 0 | 8.724058  | -2.726480 | -0.200583 |
| 129 | 6 | 0 | 8.150278  | -4.032362 | -0.305343 |
| 130 | 6 | 0 | 8.745002  | -5.088917 | 0.421001  |
| 131 | 6 | 0 | 9.858855  | -4.909055 | 1.226494  |
| 132 | 6 | 0 | 8.159641  | -1.620554 | -0.955986 |
| 133 | 6 | 0 | 6.979804  | -4.241528 | -1.150220 |
| 134 | 6 | 0 | 6.597810  | -3.184964 | -2.022971 |
| 135 | 6 | 0 | 7.204671  | -1.900700 | -1.900430 |
| 136 | 6 | 0 | 5.503677  | -3.373901 | -2.897055 |
| 137 | 6 | 0 | 4.732659  | -4.510057 | -2.829028 |
| 138 | 6 | 0 | 5.014929  | -5.525872 | -1.878331 |
| 139 | 6 | 0 | 6.165205  | -5.395351 | -1.099068 |
| 140 | 6 | 0 | 10.478015 | -6.059357 | 1.982651  |
| 141 | 1 | 0 | 3.844773  | -4.586871 | -3.446460 |
| 142 | 1 | 0 | 6.401323  | -6.180769 | -0.389337 |
| 143 | 1 | 0 | 5.232778  | -2.571356 | -3.577852 |
| 144 | 1 | 0 | 6.781121  | -1.092775 | -2.488222 |
| 145 | 1 | 0 | 8.335643  | -6.089620 | 0.324862  |
| 146 | 1 | 0 | 10.320837 | -1.576197 | 0.682003  |
| 147 | 1 | 0 | 11.302493 | -3.454335 | 1.924033  |
| 148 | 1 | 0 | 10.448213 | -5.885379 | 3.064842  |
| 149 | 1 | 0 | 9.957000  | -6.999111 | 1.780901  |
| 150 | 1 | 0 | 11.531176 | -6.194367 | 1.710357  |
| 151 | 6 | 0 | -9.007752 | -1.526728 | -3.917716 |
| 152 | 6 | 0 | -8.903771 | -0.543827 | -2.954367 |
| 153 | 6 | 0 | -8.471068 | -0.840097 | -1.640030 |
| 154 | 6 | 0 | -8.147760 | -2.193040 | -1.324920 |
| 155 | 6 | 0 | -8.261746 | -3.172316 | -2.337142 |
| 156 | 6 | 0 | -8.681133 | -2.868378 | -3.623003 |
| 157 | 6 | 0 | -8.379491 | 0.185979  | -0.611840 |
| 158 | 6 | 0 | -7.718551 | -2.528811 | 0.024971  |
| 159 | 6 | 0 | -7.917848 | -1.561335 | 1.048007  |
| 160 | 6 | 0 | -8.241378 | -0.213933 | 0.694635  |
| 161 | 6 | 0 | -7.599555 | -1.909935 | 2.382458  |
| 162 | 6 | 0 | -6.952237 | -3.090408 | 2.672030  |

|     |   |   |            |           |           |
|-----|---|---|------------|-----------|-----------|
| 163 | 6 | 0 | -6.562746  | -3.978827 | 1.635125  |
| 164 | 6 | 0 | -7.016652  | -3.710709 | 0.343918  |
| 165 | 6 | 0 | -8.807423  | -3.934826 | -4.683604 |
| 166 | 1 | 0 | -7.818832  | -1.200757 | 3.176386  |
| 167 | 1 | 0 | -6.689872  | -3.318110 | 3.700203  |
| 168 | 1 | 0 | -6.706168  | -4.365360 | -0.462737 |
| 169 | 1 | 0 | -8.199231  | 0.532538  | 1.481990  |
| 170 | 1 | 0 | -9.173942  | 0.478214  | -3.196962 |
| 171 | 1 | 0 | -9.358877  | -1.267961 | -4.913593 |
| 172 | 1 | 0 | -8.046597  | -4.207961 | -2.092424 |
| 173 | 1 | 0 | -9.828518  | -3.984622 | -5.079232 |
| 174 | 1 | 0 | -8.145563  | -3.729946 | -5.533365 |
| 175 | 1 | 0 | -8.551140  | -4.922685 | -4.291623 |
| 176 | 6 | 0 | -10.417498 | 3.615221  | 1.313384  |
| 177 | 6 | 0 | -9.864897  | 2.558293  | 0.619433  |
| 178 | 6 | 0 | -8.724061  | 2.726450  | -0.200725 |
| 179 | 6 | 0 | -8.150466  | 4.032413  | -0.305574 |
| 180 | 6 | 0 | -8.745392  | 5.088941  | 0.420652  |
| 181 | 6 | 0 | -9.859234  | 4.908968  | 1.226140  |
| 182 | 6 | 0 | -8.159490  | 1.620555  | -0.956040 |
| 183 | 6 | 0 | -6.979959  | 4.241680  | -1.150411 |
| 184 | 6 | 0 | -6.597795  | 3.185107  | -2.023079 |
| 185 | 6 | 0 | -7.204494  | 1.900768  | -1.900468 |
| 186 | 6 | 0 | -5.503647  | 3.374111  | -2.897126 |
| 187 | 6 | 0 | -4.732735  | 4.510343  | -2.829105 |
| 188 | 6 | 0 | -5.015137  | 5.526152  | -1.878449 |
| 189 | 6 | 0 | -6.165464  | 5.395586  | -1.099269 |
| 190 | 6 | 0 | -10.478605 | 6.059235  | 1.982178  |
| 191 | 1 | 0 | -3.844807  | 4.587220  | -3.446468 |
| 192 | 1 | 0 | -6.401676  | 6.181011  | -0.389584 |
| 193 | 1 | 0 | -5.232630  | 2.571553  | -3.577861 |
| 194 | 1 | 0 | -6.780801  | 1.092861  | -2.488176 |
| 195 | 1 | 0 | -8.336198  | 6.089702  | 0.324436  |
| 196 | 1 | 0 | -10.320606 | 1.575958  | 0.682012  |
| 197 | 1 | 0 | -11.302610 | 3.454057  | 1.923832  |
| 198 | 1 | 0 | -10.448817 | 5.885354  | 3.064385  |
| 199 | 1 | 0 | -9.957739  | 6.999057  | 1.780369  |
| 200 | 1 | 0 | -11.531779 | 6.194047  | 1.709834  |

**Table S8.** Cartesian coordinate of Z,R,E,R,Z,S,E,S (6)

SCF Done: E(RB3LYP) = -4621.34405630 A.U. after 6 cycles

| Center<br>Number | Atomic<br>Number | Atomic<br>Type | Coordinates (Angstroms) |          |           |
|------------------|------------------|----------------|-------------------------|----------|-----------|
|                  |                  |                | X                       | Y        | Z         |
| 1                | 6                | 0              | 9.902607                | 2.191287 | 3.041266  |
| 2                | 6                | 0              | 9.598722                | 1.318508 | 2.017145  |
| 3                | 6                | 0              | 8.845455                | 1.730873 | 0.892192  |
| 4                | 6                | 0              | 8.399754                | 3.089186 | 0.831895  |
| 5                | 6                | 0              | 8.734694                | 3.952325 | 1.900019  |
| 6                | 6                | 0              | 9.470538                | 3.534838 | 2.998139  |
| 7                | 6                | 0              | 8.556709                | 0.820804 | -0.200896 |
| 8                | 6                | 0              | 7.612584                | 3.541608 | -0.310487 |
| 9                | 6                | 0              | 7.497978                | 2.664078 | -1.424457 |
| 10               | 6                | 0              | 7.988695                | 1.329013 | -1.340791 |
| 11               | 6                | 0              | 6.760164                | 3.079254 | -2.555308 |
| 12               | 6                | 0              | 6.065676                | 4.264848 | -2.551623 |
| 13               | 6                | 0              | 6.081775                | 5.119704 | -1.417510 |



|    |   |   |            |           |           |
|----|---|---|------------|-----------|-----------|
| 14 | 6 | 0 | 6.900209   | 4.761967  | -0.344205 |
| 15 | 6 | 0 | 9.818530   | 4.483714  | 4.119210  |
| 16 | 1 | 0 | 6.689859   | 2.410065  | -3.408649 |
| 17 | 1 | 0 | 5.434998   | 4.504667  | -3.399332 |
| 18 | 1 | 0 | 6.942172   | 5.419078  | 0.516846  |
| 19 | 1 | 0 | 7.777978   | 0.665390  | -2.173609 |
| 20 | 1 | 0 | 9.955174   | 0.294702  | 2.056764  |
| 21 | 1 | 0 | 10.493377  | 1.845462  | 3.885896  |
| 22 | 1 | 0 | 8.427673   | 4.992344  | 1.853863  |
| 23 | 1 | 0 | 10.903236  | 4.550794  | 4.262273  |
| 24 | 1 | 0 | 9.443951   | 5.491805  | 3.922425  |
| 25 | 1 | 0 | 9.391396   | 4.147506  | 5.071455  |
| 26 | 6 | 0 | 10.579108  | -1.739138 | -3.144148 |
| 27 | 6 | 0 | 10.067169  | -0.954898 | -2.130589 |
| 28 | 6 | 0 | 9.157426   | -1.477578 | -1.180964 |
| 29 | 6 | 0 | 8.773636   | -2.846241 | -1.294392 |
| 30 | 6 | 0 | 9.316787   | -3.619221 | -2.345342 |
| 31 | 6 | 0 | 10.208150  | -3.095962 | -3.269271 |
| 32 | 6 | 0 | 8.635522   | -0.666045 | -0.092875 |
| 33 | 6 | 0 | 7.830492   | -3.402282 | -0.335063 |
| 34 | 6 | 0 | 7.562528   | -2.660541 | 0.849537  |
| 35 | 6 | 0 | 7.980595   | -1.294328 | 0.936353  |
| 36 | 6 | 0 | 6.713669   | -3.225613 | 1.830829  |
| 37 | 6 | 0 | 6.022587   | -4.393196 | 1.584772  |
| 38 | 6 | 0 | 6.138526   | -5.047264 | 0.332281  |
| 39 | 6 | 0 | 7.088998   | -4.578762 | -0.572390 |
| 40 | 6 | 0 | 10.788769  | -3.946278 | -4.372879 |
| 41 | 1 | 0 | 5.300079   | -4.756986 | 2.308844  |
| 42 | 1 | 0 | 7.193772   | -5.089526 | -1.523913 |
| 43 | 1 | 0 | 6.542570   | -2.677686 | 2.753752  |
| 44 | 1 | 0 | 7.607821   | -0.707625 | 1.770975  |
| 45 | 1 | 0 | 9.054200   | -4.670274 | -2.415356 |
| 46 | 1 | 0 | 10.374697  | 0.081554  | -2.043105 |
| 47 | 1 | 0 | 11.288061  | -1.311359 | -3.848743 |
| 48 | 1 | 0 | 10.397351  | -4.966543 | -4.341486 |
| 49 | 1 | 0 | 10.557715  | -3.528278 | -5.359634 |
| 50 | 1 | 0 | 11.881087  | -4.003664 | -4.298709 |
| 51 | 6 | 0 | -10.579211 | 1.739167  | 3.143982  |
| 52 | 6 | 0 | -10.067244 | 0.954918  | 2.130441  |
| 53 | 6 | 0 | -9.157462  | 1.477584  | 1.180850  |
| 54 | 6 | 0 | -8.773659  | 2.846243  | 1.294290  |
| 55 | 6 | 0 | -9.316840  | 3.619231  | 2.345215  |
| 56 | 6 | 0 | -10.208247 | 3.095986  | 3.269113  |
| 57 | 6 | 0 | -8.635526  | 0.666038  | 0.092784  |
| 58 | 6 | 0 | -7.830474  | 3.402274  | 0.334994  |
| 59 | 6 | 0 | -7.562473  | 2.660524  | -0.849593 |
| 60 | 6 | 0 | -7.980547  | 1.294314  | -0.936417 |
| 61 | 6 | 0 | -6.713582  | 3.225588  | -1.830859 |
| 62 | 6 | 0 | -6.022506  | 4.393172  | -1.584788 |
| 63 | 6 | 0 | -6.138480  | 5.047247  | -0.332304 |
| 64 | 6 | 0 | -7.088981  | 4.578748  | 0.572341  |
| 65 | 6 | 0 | -10.788926 | 3.946328  | 4.372670  |
| 66 | 1 | 0 | -6.542452  | 2.677655  | -2.753773 |
| 67 | 1 | 0 | -5.299975  | 4.756955  | -2.308841 |
| 68 | 1 | 0 | -7.193783  | 5.089517  | 1.523858  |
| 69 | 1 | 0 | -7.607738  | 0.707605  | -1.771019 |
| 70 | 1 | 0 | -10.374781 | -0.081531 | 2.042953  |
| 71 | 1 | 0 | -11.288193 | 1.311394  | 3.848553  |
| 72 | 1 | 0 | -9.054240  | 4.670280  | 2.415240  |

|     |   |   |            |            |           |
|-----|---|---|------------|------------|-----------|
| 73  | 1 | 0 | -11.881208 | 4.004040   | 4.298201  |
| 74  | 1 | 0 | -10.558270 | 3.528139   | 5.359436  |
| 75  | 1 | 0 | -10.397212 | 4.966487   | 4.341510  |
| 76  | 6 | 0 | -9.902534  | -2.191312  | -3.041388 |
| 77  | 6 | 0 | -9.598683  | -1.318527  | -2.017259 |
| 78  | 6 | 0 | -8.845432  | -1.730876  | -0.892292 |
| 79  | 6 | 0 | -8.399728  | -3.089187  | -0.831980 |
| 80  | 6 | 0 | -8.734634  | -3.952333  | -1.900108 |
| 81  | 6 | 0 | -9.470448  | -3.534855  | -2.998252 |
| 82  | 6 | 0 | -8.556735  | -0.820807  | 0.200816  |
| 83  | 6 | 0 | -7.612605  | -3.541608  | 0.310437  |
| 84  | 6 | 0 | -7.498085  | -2.664094  | 1.424428  |
| 85  | 6 | 0 | -7.988805  | -1.329029  | 1.340746  |
| 86  | 6 | 0 | -6.760341  | -3.079284  | 2.555317  |
| 87  | 6 | 0 | -6.065829  | -4.264867  | 2.551652  |
| 88  | 6 | 0 | -6.081827  | -5.119693  | 1.417520  |
| 89  | 6 | 0 | -6.900207  | -4.761949  | 0.344172  |
| 90  | 6 | 0 | -9.818358  | -4.483728  | -4.119351 |
| 91  | 1 | 0 | -5.435210  | -4.504686  | 3.399406  |
| 92  | 1 | 0 | -6.942107  | -5.419037  | -0.516899 |
| 93  | 1 | 0 | -6.690105  | -2.410118  | 3.408683  |
| 94  | 1 | 0 | -7.778137  | -0.665417  | 2.173584  |
| 95  | 1 | 0 | -8.427619  | -4.992353  | -1.853928 |
| 96  | 1 | 0 | -9.955161  | -0.294731  | -2.056888 |
| 97  | 1 | 0 | -10.493297 | -1.845495  | -3.886026 |
| 98  | 1 | 0 | -9.444214  | -5.491932  | -3.922316 |
| 99  | 1 | 0 | -10.903031 | -4.550427  | -4.262829 |
| 100 | 1 | 0 | -9.390730  | -4.147781  | -5.071469 |
| 101 | 6 | 0 | -1.806919  | -9.077598  | -3.537192 |
| 102 | 6 | 0 | -1.061518  | -9.097474  | -2.375396 |
| 103 | 6 | 0 | -1.566827  | -8.573950  | -1.161861 |
| 104 | 6 | 0 | -2.889937  | -8.039051  | -1.159379 |
| 105 | 6 | 0 | -3.620992  | -8.028663  | -2.368472 |
| 106 | 6 | 0 | -3.107324  | -8.529188  | -3.554806 |
| 107 | 6 | 0 | -0.790727  | -8.599119  | 0.071708  |
| 108 | 6 | 0 | -3.463658  | -7.548936  | 0.086348  |
| 109 | 6 | 0 | -2.793709  | -7.876569  | 1.296282  |
| 110 | 6 | 0 | -1.455230  | -8.374427  | 1.252966  |
| 111 | 6 | 0 | -3.408959  | -7.537302  | 2.523842  |
| 112 | 6 | 0 | -4.548705  | -6.766508  | 2.556822  |
| 113 | 6 | 0 | -5.112962  | -6.246033  | 1.361379  |
| 114 | 6 | 0 | -4.591160  | -6.702990  | 0.150027  |
| 115 | 6 | 0 | -3.913066  | -8.515339  | -4.830986 |
| 116 | 1 | 0 | -2.940278  | -7.855073  | 3.451558  |
| 117 | 1 | 0 | -4.989654  | -6.516356  | 3.515469  |
| 118 | 1 | 0 | -4.992301  | -6.306530  | -0.775616 |
| 119 | 1 | 0 | -0.911957  | -8.413109  | 2.191415  |
| 120 | 1 | 0 | -0.071634  | -9.540548  | -2.380987 |
| 121 | 1 | 0 | -1.393001  | -9.503044  | -4.448078 |
| 122 | 1 | 0 | -4.638503  | -7.650185  | -2.363253 |
| 123 | 1 | 0 | -3.428513  | -7.901653  | -5.599686 |
| 124 | 1 | 0 | -4.018369  | -9.523835  | -5.247162 |
| 125 | 1 | 0 | -4.916485  | -8.113372  | -4.667223 |
| 126 | 6 | 0 | 1.763020   | -10.797201 | 2.949071  |
| 127 | 6 | 0 | 0.997855   | -10.230114 | 1.949960  |
| 128 | 6 | 0 | 1.499200   | -9.191008  | 1.130885  |
| 129 | 6 | 0 | 2.842363   | -8.751688  | 1.345468  |
| 130 | 6 | 0 | 3.592828   | -9.352132  | 2.381645  |
| 131 | 6 | 0 | 3.082218   | -10.356672 | 3.189093  |

|     |   |   |           |            |           |
|-----|---|---|-----------|------------|-----------|
| 132 | 6 | 0 | 0.700031  | -8.596666  | 0.068293  |
| 133 | 6 | 0 | 3.411736  | -7.721427  | 0.485663  |
| 134 | 6 | 0 | 2.692123  | -7.373077  | -0.690647 |
| 135 | 6 | 0 | 1.342532  | -7.808017  | -0.853606 |
| 136 | 6 | 0 | 3.266036  | -6.462662  | -1.607111 |
| 137 | 6 | 0 | 4.443791  | -5.814323  | -1.314237 |
| 138 | 6 | 0 | 5.095078  | -6.026195  | -0.071870 |
| 139 | 6 | 0 | 4.595565  | -7.008140  | 0.781857  |
| 140 | 6 | 0 | 3.910118  | -10.985454 | 4.283338  |
| 141 | 1 | 0 | 4.828150  | -5.058410  | -1.991226 |
| 142 | 1 | 0 | 5.103879  | -7.181671  | 1.724768  |
| 143 | 1 | 0 | 2.725568  | -6.227207  | -2.520101 |
| 144 | 1 | 0 | 0.778255  | -7.366757  | -1.668168 |
| 145 | 1 | 0 | 4.622079  | -9.042003  | 2.532234  |
| 146 | 1 | 0 | -0.005557 | -10.599376 | 1.768284  |
| 147 | 1 | 0 | 1.350068  | -11.603838 | 3.549771  |
| 148 | 1 | 0 | 4.921254  | -10.570662 | 4.309920  |
| 149 | 1 | 0 | 3.455920  | -10.822821 | 5.267987  |
| 150 | 1 | 0 | 3.994866  | -12.069665 | 4.146356  |
| 151 | 6 | 0 | 1.806919  | 9.077506   | 3.537324  |
| 152 | 6 | 0 | 1.061523  | 9.097429   | 2.375527  |
| 153 | 6 | 0 | 1.566829  | 8.573933   | 1.161977  |
| 154 | 6 | 0 | 2.889931  | 8.039019   | 1.159483  |
| 155 | 6 | 0 | 3.620981  | 8.028579   | 2.368580  |
| 156 | 6 | 0 | 3.107314  | 8.529072   | 3.554928  |
| 157 | 6 | 0 | 0.790734  | 8.599154   | -0.071595 |
| 158 | 6 | 0 | 3.463655  | 7.548948   | -0.086260 |
| 159 | 6 | 0 | 2.793722  | 7.876647   | -1.296185 |
| 160 | 6 | 0 | 1.455247  | 8.374516   | -1.252858 |
| 161 | 6 | 0 | 3.408977  | 7.537430   | -2.523757 |
| 162 | 6 | 0 | 4.548708  | 6.766613   | -2.556763 |
| 163 | 6 | 0 | 5.112937  | 6.246067   | -1.361338 |
| 164 | 6 | 0 | 4.591141  | 6.702983   | -0.149969 |
| 165 | 6 | 0 | 3.913043  | 8.515149   | 4.831115  |
| 166 | 1 | 0 | 2.940312  | 7.855259   | -3.451461 |
| 167 | 1 | 0 | 4.989665  | 6.516494   | -3.515415 |
| 168 | 1 | 0 | 4.992273  | 6.306468   | 0.775655  |
| 169 | 1 | 0 | 0.911984  | 8.413245   | -2.191311 |
| 170 | 1 | 0 | 0.071648  | 9.540520   | 2.381125  |
| 171 | 1 | 0 | 1.393007  | 9.502936   | 4.448221  |
| 172 | 1 | 0 | 4.638487  | 7.650090   | 2.363351  |
| 173 | 1 | 0 | 4.018205  | 9.523597   | 5.247441  |
| 174 | 1 | 0 | 3.428563  | 7.901285   | 5.599721  |
| 175 | 1 | 0 | 4.916517  | 8.113337   | 4.667306  |
| 176 | 6 | 0 | -1.762987 | 10.797265  | -2.948949 |
| 177 | 6 | 0 | -0.997834 | 10.230171  | -1.949835 |
| 178 | 6 | 0 | -1.499180 | 9.191042   | -1.130789 |
| 179 | 6 | 0 | -2.842330 | 8.751706   | -1.345407 |
| 180 | 6 | 0 | -3.592781 | 9.352151   | -2.381593 |
| 181 | 6 | 0 | -3.082170 | 10.356713  | -3.189013 |
| 182 | 6 | 0 | -0.700021 | 8.596698   | -0.068190 |
| 183 | 6 | 0 | -3.411710 | 7.721431   | -0.485621 |
| 184 | 6 | 0 | -2.692118 | 7.373086   | 0.690705  |
| 185 | 6 | 0 | -1.342533 | 7.808034   | 0.853691  |
| 186 | 6 | 0 | -3.266044 | 6.462669   | 1.607156  |
| 187 | 6 | 0 | -4.443790 | 5.814320   | 1.314256  |
| 188 | 6 | 0 | -5.095048 | 6.026182   | 0.071875  |
| 189 | 6 | 0 | -4.595522 | 7.008132   | -0.781842 |
| 190 | 6 | 0 | -3.910042 | 10.985464  | -4.283299 |

|     |   |   |           |           |           |
|-----|---|---|-----------|-----------|-----------|
| 191 | 1 | 0 | -4.828155 | 5.058405  | 1.991239  |
| 192 | 1 | 0 | -5.103819 | 7.181660  | -1.724764 |
| 193 | 1 | 0 | -2.725596 | 6.227219  | 2.520159  |
| 194 | 1 | 0 | -0.778267 | 7.366768  | 1.668257  |
| 195 | 1 | 0 | -4.622024 | 9.042007  | -2.532209 |
| 196 | 1 | 0 | 0.005568  | 10.599447 | -1.768126 |
| 197 | 1 | 0 | -1.350042 | 11.603928 | -3.549619 |
| 198 | 1 | 0 | -4.921315 | 10.570991 | -4.309606 |
| 199 | 1 | 0 | -3.994409 | 12.069740 | -4.146610 |
| 200 | 1 | 0 | -3.456057 | 10.822401 | -5.267978 |

**Table S9.** Cartesian coordinate of Z,R,E,S,Z,R,E,S (7)

SCF Done: E(RB3LYP) = -4621.34307330 A.U. after 6 cycles

| Center<br>Number | Atomic<br>Number | Atomic<br>Type | Coordinates (Angstroms) |           |           |
|------------------|------------------|----------------|-------------------------|-----------|-----------|
|                  |                  |                | X                       | Y         | Z         |
| 1                | 6                | 0              | -10.982900              | 1.348265  | -2.171428 |
| 2                | 6                | 0              | -10.513998              | 0.634886  | -1.086858 |
| 3                | 6                | 0              | -9.676692               | 1.232081  | -0.115123 |
| 4                | 6                | 0              | -9.327144               | 2.607108  | -0.276745 |
| 5                | 6                | 0              | -9.823832               | 3.304525  | -1.400793 |
| 6                | 6                | 0              | -10.639511              | 2.706160  | -2.348943 |
| 7                | 6                | 0              | -9.201438               | 0.493901  | 1.044654  |
| 8                | 6                | 0              | -8.473893               | 3.251205  | 0.713324  |
| 9                | 6                | 0              | -8.257585               | 2.573740  | 1.945324  |
| 10               | 6                | 0              | -8.630487               | 1.200746  | 2.073960  |
| 11               | 6                | 0              | -7.504844               | 3.214056  | 2.957270  |
| 12               | 6                | 0              | -6.853639               | 4.402242  | 2.710534  |
| 13               | 6                | 0              | -6.913472               | 5.004758  | 1.427903  |
| 14               | 6                | 0              | -7.777587               | 4.456996  | 0.480476  |
| 15               | 6                | 0              | -11.168109              | 3.478233  | -3.533293 |
| 16               | 1                | 0              | -7.376316               | 2.711048  | 3.912061  |
| 17               | 1                | 0              | -6.202229               | 4.825945  | 3.468115  |
| 18               | 1                | 0              | -7.847944               | 4.933136  | -0.491889 |
| 19               | 1                | 0              | -8.291382               | 0.674624  | 2.960677  |
| 20               | 1                | 0              | -10.804607              | -0.402247 | -0.958177 |
| 21               | 1                | 0              | -11.637404              | 0.863250  | -2.891470 |
| 22               | 1                | 0              | -9.587608               | 4.358333  | -1.511583 |
| 23               | 1                | 0              | -12.264108              | 3.476351  | -3.553357 |
| 24               | 1                | 0              | -10.835449              | 4.519459  | -3.514149 |
| 25               | 1                | 0              | -10.831171              | 3.035993  | -4.478313 |
| 26               | 6                | 0              | -10.287406              | -2.106036 | 4.448384  |
| 27               | 6                | 0              | -10.083073              | -1.336147 | 3.321159  |
| 28               | 6                | 0              | -9.266036               | -1.785731 | 2.257077  |
| 29               | 6                | 0              | -8.654624               | -3.070726 | 2.370984  |
| 30               | 6                | 0              | -8.883910               | -3.829443 | 3.540708  |
| 31               | 6                | 0              | -9.682809               | -3.375203 | 4.578828  |
| 32               | 6                | 0              | -9.066970               | -0.991347 | 1.054708  |
| 33               | 6                | 0              | -7.816993               | -3.563770 | 1.285798  |
| 34               | 6                | 0              | -7.874045               | -2.881577 | 0.038727  |
| 35               | 6                | 0              | -8.501760               | -1.599998 | -0.038596 |
| 36               | 6                | 0              | -7.139353               | -3.393213 | -1.056586 |
| 37               | 6                | 0              | -6.256427               | -4.437778 | -0.891318 |
| 38               | 6                | 0              | -6.055425               | -5.016236 | 0.387693  |
| 39               | 6                | 0              | -6.885048               | -4.613501 | 1.433316  |
| 40               | 6                | 0              | -9.923806               | -4.211924 | 5.811712  |
| 41               | 1                | 0              | -5.628885               | -4.750186 | -1.719936 |

|     |   |   |            |           |           |
|-----|---|---|------------|-----------|-----------|
| 42  | 1 | 0 | -6.748905  | -5.069195 | 2.408561  |
| 43  | 1 | 0 | -7.215781  | -2.892498 | -2.018195 |
| 44  | 1 | 0 | -8.367680  | -1.034976 | -0.955618 |
| 45  | 1 | 0 | -8.447149  | -4.820307 | 3.617905  |
| 46  | 1 | 0 | -10.570984 | -0.371390 | 3.232651  |
| 47  | 1 | 0 | -10.933793 | -1.737432 | 5.241068  |
| 48  | 1 | 0 | -9.400981  | -5.170367 | 5.754890  |
| 49  | 1 | 0 | -9.579681  | -3.695656 | 6.715627  |
| 50  | 1 | 0 | -10.991276 | -4.419597 | 5.949934  |
| 51  | 6 | 0 | 10.287430  | 2.106041  | 4.448308  |
| 52  | 6 | 0 | 10.083093  | 1.336158  | 3.321079  |
| 53  | 6 | 0 | 9.266054   | 1.785750  | 2.257002  |
| 54  | 6 | 0 | 8.654640   | 3.070743  | 2.370920  |
| 55  | 6 | 0 | 8.883930   | 3.829453  | 3.540649  |
| 56  | 6 | 0 | 9.682834   | 3.375207  | 4.578762  |
| 57  | 6 | 0 | 9.066979   | 0.991371  | 1.054632  |
| 58  | 6 | 0 | 7.817003   | 3.563791  | 1.285742  |
| 59  | 6 | 0 | 7.874051   | 2.881608  | 0.038665  |
| 60  | 6 | 0 | 8.501764   | 1.600027  | -0.038667 |
| 61  | 6 | 0 | 7.139356   | 3.393253  | -1.056641 |
| 62  | 6 | 0 | 6.256428   | 4.437815  | -0.891362 |
| 63  | 6 | 0 | 6.055423   | 5.016255  | 0.387657  |
| 64  | 6 | 0 | 6.885050   | 4.613513  | 1.433274  |
| 65  | 6 | 0 | 9.923836   | 4.211920  | 5.811651  |
| 66  | 1 | 0 | 7.215782   | 2.892547  | -2.018255 |
| 67  | 1 | 0 | 5.628882   | 4.750226  | -1.719974 |
| 68  | 1 | 0 | 6.748906   | 5.069195  | 2.408524  |
| 69  | 1 | 0 | 8.367675   | 1.035009  | -0.955690 |
| 70  | 1 | 0 | 10.571002  | 0.371402  | 3.232563  |
| 71  | 1 | 0 | 10.933820  | 1.737432  | 5.240988  |
| 72  | 1 | 0 | 8.447169   | 4.820316  | 3.617853  |
| 73  | 1 | 0 | 9.579714   | 3.695647  | 6.715564  |
| 74  | 1 | 0 | 10.991306  | 4.419592  | 5.949870  |
| 75  | 1 | 0 | 9.401011   | 5.170364  | 5.754836  |
| 76  | 6 | 0 | 10.982840  | -1.348296 | -2.171515 |
| 77  | 6 | 0 | 10.513959  | -0.634899 | -1.086948 |
| 78  | 6 | 0 | 9.676662   | -1.232076 | -0.115193 |
| 79  | 6 | 0 | 9.327104   | -2.607104 | -0.276791 |
| 80  | 6 | 0 | 9.823772   | -3.304538 | -1.400837 |
| 81  | 6 | 0 | 10.639440  | -2.706192 | -2.349007 |
| 82  | 6 | 0 | 9.201430   | -0.493878 | 1.044583  |
| 83  | 6 | 0 | 8.473865   | -3.251183 | 0.713300  |
| 84  | 6 | 0 | 8.257578   | -2.573700 | 1.945294  |
| 85  | 6 | 0 | 8.630491   | -1.200707 | 2.073907  |
| 86  | 6 | 0 | 7.504847   | -3.213996 | 2.957260  |
| 87  | 6 | 0 | 6.853634   | -4.402182 | 2.710552  |
| 88  | 6 | 0 | 6.913450   | -5.004721 | 1.427931  |
| 89  | 6 | 0 | 7.777554   | -4.456978 | 0.480483  |
| 90  | 6 | 0 | 11.168016  | -3.478284 | -3.533354 |
| 91  | 1 | 0 | 6.202233   | -4.825873 | 3.468148  |
| 92  | 1 | 0 | 7.847897   | -4.933136 | -0.491875 |
| 93  | 1 | 0 | 7.376335   | -2.710973 | 3.912045  |
| 94  | 1 | 0 | 8.291406   | -0.674572 | 2.960623  |
| 95  | 1 | 0 | 9.587540   | -4.358348 | -1.511608 |
| 96  | 1 | 0 | 10.804577  | 0.402233  | -0.958285 |
| 97  | 1 | 0 | 11.637337  | -0.863295 | -2.891573 |
| 98  | 1 | 0 | 10.835351  | -4.519508 | -3.514190 |
| 99  | 1 | 0 | 10.831067  | -3.036055 | -4.478375 |
| 100 | 1 | 0 | 12.264015  | -3.476409 | -3.553434 |

|     |   |   |           |            |           |
|-----|---|---|-----------|------------|-----------|
| 101 | 6 | 0 | 1.616390  | -5.701490  | -3.797368 |
| 102 | 6 | 0 | 1.065963  | -6.381536  | -2.731197 |
| 103 | 6 | 0 | 1.846180  | -6.767480  | -1.612650 |
| 104 | 6 | 0 | 3.213598  | -6.362126  | -1.584572 |
| 105 | 6 | 0 | 3.749149  | -5.686978  | -2.705848 |
| 106 | 6 | 0 | 2.985549  | -5.359120  | -3.813539 |
| 107 | 6 | 0 | 1.293055  | -7.517719  | -0.492551 |
| 108 | 6 | 0 | 4.005684  | -6.596964  | -0.386884 |
| 109 | 6 | 0 | 3.476883  | -7.437762  | 0.629918  |
| 110 | 6 | 0 | 2.124123  | -7.897714  | 0.529159  |
| 111 | 6 | 0 | 4.250569  | -7.666934  | 1.794175  |
| 112 | 6 | 0 | 5.424777  | -6.978306  | 2.018952  |
| 113 | 6 | 0 | 5.892434  | -6.025984  | 1.078029  |
| 114 | 6 | 0 | 5.206697  | -5.904451  | -0.127838 |
| 115 | 6 | 0 | 3.584381  | -4.652791  | -5.005040 |
| 116 | 1 | 0 | 3.871304  | -8.352857  | 2.547384  |
| 117 | 1 | 0 | 5.973664  | -7.132924  | 2.943236  |
| 118 | 1 | 0 | 5.533640  | -5.143295  | -0.825895 |
| 119 | 1 | 0 | 1.718325  | -8.476102  | 1.355023  |
| 120 | 1 | 0 | 0.013576  | -6.631669  | -2.755521 |
| 121 | 1 | 0 | 0.986785  | -5.431026  | -4.641471 |
| 122 | 1 | 0 | 4.802643  | -5.426790  | -2.709905 |
| 123 | 1 | 0 | 3.515345  | -5.268939  | -5.909442 |
| 124 | 1 | 0 | 3.057689  | -3.715102  | -5.216957 |
| 125 | 1 | 0 | 4.639049  | -4.415218  | -4.842256 |
| 126 | 6 | 0 | -1.338417 | -9.942582  | -3.106045 |
| 127 | 6 | 0 | -0.518629 | -9.263429  | -2.228887 |
| 128 | 6 | 0 | -1.047167 | -8.363269  | -1.273862 |
| 129 | 6 | 0 | -2.461374 | -8.167756  | -1.229032 |
| 130 | 6 | 0 | -3.268545 | -8.882072  | -2.143651 |
| 131 | 6 | 0 | -2.739146 | -9.760548  | -3.076639 |
| 132 | 6 | 0 | -0.188241 | -7.662961  | -0.338310 |
| 133 | 6 | 0 | -3.028367 | -7.250474  | -0.248043 |
| 134 | 6 | 0 | -2.179744 | -6.782086  | 0.793612  |
| 135 | 6 | 0 | -0.769058 | -6.997643  | 0.708527  |
| 136 | 6 | 0 | -2.723549 | -5.967900  | 1.812639  |
| 137 | 6 | 0 | -4.019027 | -5.508833  | 1.734806  |
| 138 | 6 | 0 | -4.832588 | -5.829539  | 0.617992  |
| 139 | 6 | 0 | -4.343357 | -6.737635  | -0.319746 |
| 140 | 6 | 0 | -3.625690 | -10.520828 | -4.032922 |
| 141 | 1 | 0 | -4.389498 | -4.810602  | 2.478268  |
| 142 | 1 | 0 | -4.972180 | -6.999742  | -1.164221 |
| 143 | 1 | 0 | -2.078062 | -5.643031  | 2.624387  |
| 144 | 1 | 0 | -0.136708 | -6.497159  | 1.436089  |
| 145 | 1 | 0 | -4.346891 | -8.765655  | -2.097006 |
| 146 | 1 | 0 | 0.554932  | -9.421019  | -2.255921 |
| 147 | 1 | 0 | -0.904119 | -10.635209 | -3.822690 |
| 148 | 1 | 0 | -4.681176 | -10.282495 | -3.877022 |
| 149 | 1 | 0 | -3.379483 | -10.286039 | -5.075202 |
| 150 | 1 | 0 | -3.504846 | -11.603757 | -3.912953 |
| 151 | 6 | 0 | -1.616329 | 5.701144   | -3.797303 |
| 152 | 6 | 0 | -1.065919 | 6.381276   | -2.731179 |
| 153 | 6 | 0 | -1.846160 | 6.767349   | -1.612691 |
| 154 | 6 | 0 | -3.213582 | 6.362005   | -1.584611 |
| 155 | 6 | 0 | -3.749116 | 5.686766   | -2.705840 |
| 156 | 6 | 0 | -2.985495 | 5.358800   | -3.813484 |
| 157 | 6 | 0 | -1.293058 | 7.517680   | -0.492634 |
| 158 | 6 | 0 | -4.005690 | 6.596921   | -0.386954 |
| 159 | 6 | 0 | -3.476904 | 7.437771   | 0.629810  |

|     |   |   |           |           |           |
|-----|---|---|-----------|-----------|-----------|
| 160 | 6 | 0 | -2.124145 | 7.897722  | 0.529043  |
| 161 | 6 | 0 | -4.250605 | 7.667001  | 1.794046  |
| 162 | 6 | 0 | -5.424812 | 6.978379  | 2.018845  |
| 163 | 6 | 0 | -5.892457 | 6.026010  | 1.077964  |
| 164 | 6 | 0 | -5.206706 | 5.904420  | -0.127890 |
| 165 | 6 | 0 | -3.584306 | 4.652371  | -5.004936 |
| 166 | 1 | 0 | -3.871350 | 8.352964  | 2.547225  |
| 167 | 1 | 0 | -5.973709 | 7.133041  | 2.943116  |
| 168 | 1 | 0 | -5.533635 | 5.143225  | -0.825911 |
| 169 | 1 | 0 | -1.718364 | 8.476161  | 1.354880  |
| 170 | 1 | 0 | -0.013526 | 6.631372  | -2.755498 |
| 171 | 1 | 0 | -0.986705 | 5.430586  | -4.641362 |
| 172 | 1 | 0 | -4.802610 | 5.426584  | -2.709895 |
| 173 | 1 | 0 | -3.515236 | 5.268435  | -5.909393 |
| 174 | 1 | 0 | -3.057623 | 3.714654  | -5.216753 |
| 175 | 1 | 0 | -4.638983 | 4.414830  | -4.842158 |
| 176 | 6 | 0 | 1.338471  | 9.942870  | -3.105818 |
| 177 | 6 | 0 | 0.518663  | 9.263625  | -2.228749 |
| 178 | 6 | 0 | 1.047177  | 8.363354  | -1.273814 |
| 179 | 6 | 0 | 2.461385  | 8.167852  | -1.228961 |
| 180 | 6 | 0 | 3.268577  | 8.882263  | -2.143488 |
| 181 | 6 | 0 | 2.739198  | 9.760831  | -3.076401 |
| 182 | 6 | 0 | 0.188234  | 7.662947  | -0.338349 |
| 183 | 6 | 0 | 3.028360  | 7.250503  | -0.248026 |
| 184 | 6 | 0 | 2.179719  | 6.782050  | 0.793585  |
| 185 | 6 | 0 | 0.769032  | 6.997590  | 0.708473  |
| 186 | 6 | 0 | 2.723509  | 5.967816  | 1.812582  |
| 187 | 6 | 0 | 4.018994  | 5.508769  | 1.734754  |
| 188 | 6 | 0 | 4.832575  | 5.829538  | 0.617972  |
| 189 | 6 | 0 | 4.343355  | 6.737679  | -0.319729 |
| 190 | 6 | 0 | 3.625764  | 10.521212 | -4.032583 |
| 191 | 1 | 0 | 4.389455  | 4.810502  | 2.478187  |
| 192 | 1 | 0 | 4.972196  | 6.999841  | -1.164173 |
| 193 | 1 | 0 | 2.078007  | 5.642896  | 2.624297  |
| 194 | 1 | 0 | 0.136670  | 6.497049  | 1.435986  |
| 195 | 1 | 0 | 4.346922  | 8.765853  | -2.096821 |
| 196 | 1 | 0 | -0.554897 | 9.421222  | -2.255790 |
| 197 | 1 | 0 | 0.904189  | 10.635574 | -3.822397 |
| 198 | 1 | 0 | 4.681247  | 10.282866 | -3.876681 |
| 199 | 1 | 0 | 3.379584  | 10.286531 | -5.074893 |
| 200 | 1 | 0 | 3.504915  | 11.604129 | -3.912504 |

**Table S10.** Cartesian coordinate of  $Z,R,Z,R,Z,S,E,S$  (8)

SCF Done: E(RB3LYP) = -4621.34305687 A.U. after 14 cycles

| Center<br>Number | Atomic<br>Number | Atomic<br>Type | Coordinates (Angstroms) |            |           |
|------------------|------------------|----------------|-------------------------|------------|-----------|
|                  |                  |                | X                       | Y          | Z         |
| 1                | 6                | 0              | -2.828593               | -10.406548 | 1.172415  |
| 2                | 6                | 0              | -1.789141               | -9.691338  | 0.615182  |
| 3                | 6                | 0              | -2.027790               | -8.592116  | -0.243177 |
| 4                | 6                | 0              | -3.380764               | -8.225525  | -0.526563 |
| 5                | 6                | 0              | -4.417527               | -8.985185  | 0.061775  |
| 6                | 6                | 0              | -4.171368               | -10.062426 | 0.899423  |
| 7                | 6                | 0              | -0.934410               | -7.862377  | -0.852729 |
| 8                | 6                | 0              | -3.651336               | -7.090438  | -1.402749 |
| 9                | 6                | 0              | -2.558507               | -6.537851  | -2.126925 |
| 10               | 6                | 0              | -1.224034               | -6.946820  | -1.828432 |

|    |   |   |           |            |           |
|----|---|---|-----------|------------|-----------|
| 11 | 6 | 0 | -2.792310 | -5.476748  | -3.028485 |
| 12 | 6 | 0 | -4.031130 | -4.887930  | -3.119226 |
| 13 | 6 | 0 | -5.109395 | -5.331452  | -2.309284 |
| 14 | 6 | 0 | -4.912825 | -6.461200  | -1.513706 |
| 15 | 6 | 0 | -5.299523 | -10.864132 | 1.502003  |
| 16 | 1 | 0 | -1.956364 | -5.078592  | -3.597347 |
| 17 | 1 | 0 | -4.157476 | -4.012759  | -3.746257 |
| 18 | 1 | 0 | -5.740155 | -6.822869  | -0.912771 |
| 19 | 1 | 0 | -0.411872 | -6.413557  | -2.313571 |
| 20 | 1 | 0 | -0.761656 | -9.974185  | 0.822003  |
| 21 | 1 | 0 | -2.614447 | -11.252566 | 1.820744  |
| 22 | 1 | 0 | -5.448945 | -8.737923  | -0.169665 |
| 23 | 1 | 0 | -5.240322 | -11.918511 | 1.207899  |
| 24 | 1 | 0 | -6.274915 | -10.483622 | 1.187276  |
| 25 | 1 | 0 | -5.266138 | -10.836480 | 2.597561  |
| 26 | 6 | 0 | 0.442010  | -6.632453  | 3.111589  |
| 27 | 6 | 0 | 0.015238  | -7.118538  | 1.893160  |
| 28 | 6 | 0 | 0.927868  | -7.403644  | 0.847846  |
| 29 | 6 | 0 | 2.306551  | -7.108028  | 1.066280  |
| 30 | 6 | 0 | 2.709212  | -6.626933  | 2.333105  |
| 31 | 6 | 0 | 1.810701  | -6.393499  | 3.361119  |
| 32 | 6 | 0 | 0.501957  | -7.941796  | -0.436415 |
| 33 | 6 | 0 | 3.251886  | -7.253803  | -0.030296 |
| 34 | 6 | 0 | 2.835018  | -7.941587  | -1.202239 |
| 35 | 6 | 0 | 1.453013  | -8.282824  | -1.362240 |
| 36 | 6 | 0 | 3.762148  | -8.107018  | -2.259928 |
| 37 | 6 | 0 | 4.988184  | -7.476053  | -2.237655 |
| 38 | 6 | 0 | 5.351368  | -6.642842  | -1.148365 |
| 39 | 6 | 0 | 4.506136  | -6.607577  | -0.041593 |
| 40 | 6 | 0 | 2.266782  | -5.896732  | 4.711196  |
| 41 | 1 | 0 | 5.661081  | -7.576359  | -3.084029 |
| 42 | 1 | 0 | 4.757544  | -5.940698  | 0.774678  |
| 43 | 1 | 0 | 3.465886  | -8.687622  | -3.129833 |
| 44 | 1 | 0 | 1.139499  | -8.706120  | -2.312902 |
| 45 | 1 | 0 | 3.764152  | -6.450139  | 2.517215  |
| 46 | 1 | 0 | -1.041194 | -7.295742  | 1.737018  |
| 47 | 1 | 0 | -0.286621 | -6.435915  | 3.894253  |
| 48 | 1 | 0 | 3.344927  | -5.716391  | 4.729121  |
| 49 | 1 | 0 | 2.035002  | -6.620851  | 5.501309  |
| 50 | 1 | 0 | 1.764915  | -4.959997  | 4.979796  |
| 51 | 6 | 0 | -1.760388 | 8.942131   | -3.227281 |
| 52 | 6 | 0 | -0.944598 | 8.863931   | -2.116693 |
| 53 | 6 | 0 | -1.402923 | 8.307712   | -0.898863 |
| 54 | 6 | 0 | -2.750126 | 7.839549   | -0.836593 |
| 55 | 6 | 0 | -3.554560 | 7.931607   | -1.994732 |
| 56 | 6 | 0 | -3.088631 | 8.465931   | -3.185951 |
| 57 | 6 | 0 | -0.553660 | 8.236300   | 0.281723  |
| 58 | 6 | 0 | -3.266166 | 7.300473   | 0.414198  |
| 59 | 6 | 0 | -2.498860 | 7.508312   | 1.592868  |
| 60 | 6 | 0 | -1.148088 | 7.961372   | 1.488968  |
| 61 | 6 | 0 | -3.032863 | 7.093553   | 2.835887  |
| 62 | 6 | 0 | -4.195988 | 6.360481   | 2.897855  |
| 63 | 6 | 0 | -4.874137 | 5.972439   | 1.712257  |
| 64 | 6 | 0 | -4.429660 | 6.505265   | 0.502163  |
| 65 | 6 | 0 | -3.971714 | 8.560278   | -4.406326 |
| 66 | 1 | 0 | -2.480299 | 7.316875   | 3.744760  |
| 67 | 1 | 0 | -4.571766 | 6.033433   | 3.861895  |
| 68 | 1 | 0 | -4.923060 | 6.197143   | -0.412918 |
| 69 | 1 | 0 | -0.542857 | 7.926431   | 2.389098  |



|     |   |   |           |           |           |
|-----|---|---|-----------|-----------|-----------|
| 70  | 1 | 0 | 0.066523  | 9.253177  | -2.164851 |
| 71  | 1 | 0 | -1.380422 | 9.389534  | -4.142441 |
| 72  | 1 | 0 | -4.588450 | 7.604623  | -1.943303 |
| 73  | 1 | 0 | -3.570117 | 7.963341  | -5.233773 |
| 74  | 1 | 0 | -4.047179 | 9.593177  | -4.765235 |
| 75  | 1 | 0 | -4.983486 | 8.202482  | -4.197760 |
| 76  | 6 | 0 | 2.191859  | 10.327364 | 3.046887  |
| 77  | 6 | 0 | 1.361071  | 9.787979  | 2.085786  |
| 78  | 6 | 0 | 1.800929  | 8.760169  | 1.218194  |
| 79  | 6 | 0 | 3.147048  | 8.299123  | 1.346025  |
| 80  | 6 | 0 | 3.966692  | 8.872501  | 2.344505  |
| 81  | 6 | 0 | 3.518360  | 9.868927  | 3.197638  |
| 82  | 6 | 0 | 0.934468  | 8.198995  | 0.191943  |
| 83  | 6 | 0 | 3.645751  | 7.270728  | 0.442023  |
| 84  | 6 | 0 | 2.854690  | 6.947882  | -0.695373 |
| 85  | 6 | 0 | 1.507029  | 7.413604  | -0.777622 |
| 86  | 6 | 0 | 3.359599  | 6.033290  | -1.648481 |
| 87  | 6 | 0 | 4.537491  | 5.356240  | -1.424845 |
| 88  | 6 | 0 | 5.258943  | 5.544231  | -0.218563 |
| 89  | 6 | 0 | 4.828431  | 6.531216  | 0.666228  |
| 90  | 6 | 0 | 4.419058  | 10.470760 | 4.248640  |
| 91  | 1 | 0 | 4.868117  | 4.597703  | -2.127132 |
| 92  | 1 | 0 | 5.391144  | 6.686025  | 1.580993  |
| 93  | 1 | 0 | 2.765678  | 5.817050  | -2.532596 |
| 94  | 1 | 0 | 0.887815  | 6.999423  | -1.566605 |
| 95  | 1 | 0 | 4.999035  | 8.547742  | 2.427734  |
| 96  | 1 | 0 | 0.352062  | 10.169405 | 1.973421  |
| 97  | 1 | 0 | 1.825236  | 11.126057 | 3.687000  |
| 98  | 1 | 0 | 4.519014  | 11.554170 | 4.115157  |
| 99  | 1 | 0 | 5.421149  | 10.035043 | 4.215414  |
| 100 | 1 | 0 | 4.016928  | 10.309231 | 5.255799  |
| 101 | 6 | 0 | 10.750994 | 1.254642  | -3.362585 |
| 102 | 6 | 0 | 10.293112 | 0.485299  | -2.312293 |
| 103 | 6 | 0 | 9.365286  | 0.993613  | -1.372515 |
| 104 | 6 | 0 | 8.915126  | 2.339368  | -1.527461 |
| 105 | 6 | 0 | 9.403238  | 3.095941  | -2.616848 |
| 106 | 6 | 0 | 10.305370 | 2.582984  | -3.536020 |
| 107 | 6 | 0 | 8.894740  | 0.194857  | -0.250871 |
| 108 | 6 | 0 | 7.977805  | 2.897615  | -0.562190 |
| 109 | 6 | 0 | 7.759025  | 2.179146  | 0.646207  |
| 110 | 6 | 0 | 8.221841  | 0.831569  | 0.762131  |
| 111 | 6 | 0 | 6.931401  | 2.748215  | 1.642390  |
| 112 | 6 | 0 | 6.226873  | 3.907606  | 1.401809  |
| 113 | 6 | 0 | 6.301019  | 4.545749  | 0.137903  |
| 114 | 6 | 0 | 7.215436  | 4.062637  | -0.796233 |
| 115 | 6 | 0 | 10.820711 | 3.416566  | -4.683932 |
| 116 | 1 | 0 | 6.796455  | 2.213815  | 2.579100  |
| 117 | 1 | 0 | 5.528771  | 4.281253  | 2.144352  |
| 118 | 1 | 0 | 7.285727  | 4.561779  | -1.757126 |
| 119 | 1 | 0 | 7.882328  | 0.260896  | 1.620897  |
| 120 | 1 | 0 | 10.661316 | -0.527095 | -2.186618 |
| 121 | 1 | 0 | 11.475272 | 0.837956  | -4.058194 |
| 122 | 1 | 0 | 9.089019  | 4.129579  | -2.722303 |
| 123 | 1 | 0 | 10.562114 | 2.965798  | -5.649355 |
| 124 | 1 | 0 | 11.913099 | 3.503005  | -4.654760 |
| 125 | 1 | 0 | 10.404014 | 4.427086  | -4.664825 |
| 126 | 6 | 0 | 10.064229 | -2.401089 | 3.132065  |
| 127 | 6 | 0 | 9.826579  | -1.615284 | 2.022730  |
| 128 | 6 | 0 | 9.121412  | -2.112098 | 0.900847  |

|     |   |   |            |           |           |
|-----|---|---|------------|-----------|-----------|
| 129 | 6 | 0 | 8.662448   | -3.464689 | 0.935490  |
| 130 | 6 | 0 | 8.923461   | -4.237942 | 2.089275  |
| 131 | 6 | 0 | 9.608967   | -3.736365 | 3.184851  |
| 132 | 6 | 0 | 8.891713   | -1.296561 | -0.281321 |
| 133 | 6 | 0 | 7.945760   | -4.010772 | -0.210077 |
| 134 | 6 | 0 | 7.961925   | -3.263199 | -1.420305 |
| 135 | 6 | 0 | 8.435670   | -1.916414 | -1.417883 |
| 136 | 6 | 0 | 7.344897   | -3.805834 | -2.571164 |
| 137 | 6 | 0 | 6.610225   | -4.967563 | -2.499048 |
| 138 | 6 | 0 | 6.445397   | -5.643864 | -1.262713 |
| 139 | 6 | 0 | 7.169608   | -5.189625 | -0.160914 |
| 140 | 6 | 0 | 9.884253   | -4.588868 | 4.399644  |
| 141 | 1 | 0 | 6.067575   | -5.313875 | -3.372427 |
| 142 | 1 | 0 | 7.068749   | -5.721233 | 0.779287  |
| 143 | 1 | 0 | 7.391687   | -3.248028 | -3.502748 |
| 144 | 1 | 0 | 8.278253   | -1.332528 | -2.319131 |
| 145 | 1 | 0 | 8.605743   | -5.275786 | 2.109485  |
| 146 | 1 | 0 | 10.202320  | -0.598248 | 1.993718  |
| 147 | 1 | 0 | 10.621998  | -1.992246 | 3.970999  |
| 148 | 1 | 0 | 9.494853   | -5.602770 | 4.274915  |
| 149 | 1 | 0 | 9.423359   | -4.161138 | 5.297890  |
| 150 | 1 | 0 | 10.959652  | -4.664322 | 4.598270  |
| 151 | 6 | 0 | -9.684602  | -2.422875 | 3.018280  |
| 152 | 6 | 0 | -9.539183  | -1.402742 | 2.099645  |
| 153 | 6 | 0 | -8.915422  | -1.619028 | 0.848257  |
| 154 | 6 | 0 | -8.440771  | -2.929832 | 0.549518  |
| 155 | 6 | 0 | -8.600955  | -3.948681 | 1.514928  |
| 156 | 6 | 0 | -9.209531  | -3.723029 | 2.740059  |
| 157 | 6 | 0 | -8.773006  | -0.554993 | -0.135775 |
| 158 | 6 | 0 | -7.810999  | -3.182696 | -0.737920 |
| 159 | 6 | 0 | -7.976333  | -2.210105 | -1.761837 |
| 160 | 6 | 0 | -8.452756  | -0.904033 | -1.425072 |
| 161 | 6 | 0 | -7.464773  | -2.491844 | -3.051233 |
| 162 | 6 | 0 | -6.661753  | -3.589066 | -3.270276 |
| 163 | 6 | 0 | -6.301855  | -4.451079 | -2.200531 |
| 164 | 6 | 0 | -6.947929  | -4.272653 | -0.977421 |
| 165 | 6 | 0 | -9.383407  | -4.831266 | 3.749817  |
| 166 | 1 | 0 | -7.658380  | -1.789689 | -3.857976 |
| 167 | 1 | 0 | -6.250438  | -3.760765 | -4.259783 |
| 168 | 1 | 0 | -6.670244  | -4.907444 | -0.143321 |
| 169 | 1 | 0 | -8.371153  | -0.132994 | -2.184986 |
| 170 | 1 | 0 | -9.922887  | -0.414134 | 2.327916  |
| 171 | 1 | 0 | -10.183543 | -2.226688 | 3.964116  |
| 172 | 1 | 0 | -8.267723  | -4.954191 | 1.276318  |
| 173 | 1 | 0 | -8.980710  | -5.777811 | 3.379631  |
| 174 | 1 | 0 | -10.441083 | -4.987845 | 3.991757  |
| 175 | 1 | 0 | -8.872470  | -4.594952 | 4.690619  |
| 176 | 6 | 0 | -10.677385 | 2.854676  | -2.238625 |
| 177 | 6 | 0 | -10.185418 | 1.798691  | -1.498968 |
| 178 | 6 | 0 | -9.177206  | 1.983329  | -0.523513 |
| 179 | 6 | 0 | -8.677204  | 3.306038  | -0.306505 |
| 180 | 6 | 0 | -9.206352  | 4.360731  | -1.084489 |
| 181 | 6 | 0 | -10.188053 | 4.164317  | -2.043510 |
| 182 | 6 | 0 | -8.677844  | 0.875632  | 0.274254  |
| 183 | 6 | 0 | -7.648147  | 3.534268  | 0.702243  |
| 184 | 6 | 0 | -7.349344  | 2.465033  | 1.591603  |
| 185 | 6 | 0 | -7.877012  | 1.163352  | 1.350619  |
| 186 | 6 | 0 | -6.399739  | 2.665227  | 2.618324  |
| 187 | 6 | 0 | -5.681101  | 3.833933  | 2.697380  |

|     |   |   |            |          |           |
|-----|---|---|------------|----------|-----------|
| 188 | 6 | 0 | -5.872806  | 4.873246 | 1.749374  |
| 189 | 6 | 0 | -6.888299  | 4.722171 | 0.804072  |
| 190 | 6 | 0 | -10.739711 | 5.313106 | -2.852383 |
| 191 | 1 | 0 | -4.896266  | 3.924486 | 3.439856  |
| 192 | 1 | 0 | -7.056876  | 5.523877 | 0.093182  |
| 193 | 1 | 0 | -6.192362  | 1.849976 | 3.306296  |
| 194 | 1 | 0 | -7.502616  | 0.355041 | 1.969974  |
| 195 | 1 | 0 | -8.854941  | 5.372436 | -0.907929 |
| 196 | 1 | 0 | -10.589493 | 0.803014 | -1.647678 |
| 197 | 1 | 0 | -11.461817 | 2.679425 | -2.970725 |
| 198 | 1 | 0 | -10.551784 | 5.171354 | -3.923301 |
| 199 | 1 | 0 | -10.288996 | 6.264428 | -2.557287 |
| 200 | 1 | 0 | -11.825084 | 5.403010 | -2.728271 |

**Table S11.** Cartesian coordinate of  $E,R,E,R,Z,R,Z,R$  (9)

SCF Done: E(RB3LYP) = -4621.34284879 A.U. after 5 cycles

| Center<br>Number | Atomic<br>Number | Atomic<br>Type | Coordinates (Angstroms) |           |           |
|------------------|------------------|----------------|-------------------------|-----------|-----------|
|                  |                  |                | X                       | Y         | Z         |
| 1                | 6                | 0              | 0.731609                | -5.421761 | -3.398532 |
| 2                | 6                | 0              | 0.281007                | -6.095647 | -2.282589 |
| 3                | 6                | 0              | 1.178147                | -6.644933 | -1.332412 |
| 4                | 6                | 0              | 2.572359                | -6.418165 | -1.529596 |
| 5                | 6                | 0              | 2.999315                | -5.743721 | -2.696387 |
| 6                | 6                | 0              | 2.111869                | -5.250630 | -3.638309 |
| 7                | 6                | 0              | 0.728340                | -7.407410 | -0.173785 |
| 8                | 6                | 0              | 3.513381                | -6.834071 | -0.502246 |
| 9                | 6                | 0              | 3.061306                | -7.689734 | 0.538541  |
| 10               | 6                | 0              | 1.661875                | -7.983322 | 0.647401  |
| 11               | 6                | 0              | 3.980904                | -8.080285 | 1.543834  |
| 12               | 6                | 0              | 5.244026                | -7.527002 | 1.612273  |
| 13               | 6                | 0              | 5.659426                | -6.563063 | 0.659167  |
| 14               | 6                | 0              | 4.810837                | -6.291269 | -0.410691 |
| 15               | 6                | 0              | 2.591592                | -4.546466 | -4.883679 |
| 16               | 6                | 0              | -0.731180               | -5.420696 | 3.398070  |
| 17               | 6                | 0              | -0.280662               | -6.094924 | 2.282300  |
| 18               | 6                | 0              | -1.177871               | -6.644483 | 1.332345  |
| 19               | 6                | 0              | -2.572064               | -6.417633 | 1.529555  |
| 20               | 6                | 0              | -2.998934               | -5.742844 | 2.696177  |
| 21               | 6                | 0              | -2.111418               | -5.249484 | 3.637896  |
| 22               | 6                | 0              | -0.728153               | -7.407311 | 0.173909  |
| 23               | 6                | 0              | -3.513165               | -6.833815 | 0.502384  |
| 24               | 6                | 0              | -3.061168               | -7.689729 | -0.538232 |
| 25               | 6                | 0              | -1.661749               | -7.983384 | -0.647091 |
| 26               | 6                | 0              | -3.980839               | -8.080506 | -1.543368 |
| 27               | 6                | 0              | -5.243983               | -7.527262 | -1.611833 |
| 28               | 6                | 0              | -5.659337               | -6.563151 | -0.658888 |
| 29               | 6                | 0              | -4.810641               | -6.291070 | 0.410816  |
| 30               | 6                | 0              | -2.591054               | -4.544970 | 4.883101  |
| 31               | 6                | 0              | 1.528966                | 9.428645  | -3.339668 |
| 32               | 6                | 0              | 0.842817                | 9.008063  | -2.219084 |
| 33               | 6                | 0              | 1.453217                | 8.182938  | -1.244286 |
| 34               | 6                | 0              | 2.812406                | 7.791768  | -1.442828 |
| 35               | 6                | 0              | 3.482378                | 8.243023  | -2.602791 |
| 36               | 6                | 0              | 2.871979                | 9.047693  | -3.552094 |
| 37               | 6                | 0              | 0.744789                | 7.764491  | -0.046636 |
| 38               | 6                | 0              | 3.467302                | 6.943960  | -0.455043 |

|    |   |   |            |           |           |
|----|---|---|------------|-----------|-----------|
| 39 | 6 | 0 | 2.811419   | 6.738650  | 0.790902  |
| 40 | 6 | 0 | 1.457278   | 7.161275  | 0.958685  |
| 41 | 6 | 0 | 3.458150   | 5.973026  | 1.789322  |
| 42 | 6 | 0 | 4.642170   | 5.320159  | 1.528249  |
| 43 | 6 | 0 | 5.241396   | 5.396075  | 0.244873  |
| 44 | 6 | 0 | 4.672730   | 6.250399  | -0.698833 |
| 45 | 6 | 0 | 3.615210   | 9.523683  | -4.776488 |
| 46 | 6 | 0 | -1.529175  | 9.428596  | 3.339533  |
| 47 | 6 | 0 | -0.843024  | 9.008031  | 2.218944  |
| 48 | 6 | 0 | -1.453413  | 8.182896  | 1.244149  |
| 49 | 6 | 0 | -2.812588  | 7.791687  | 1.442704  |
| 50 | 6 | 0 | -3.482564  | 8.242926  | 2.602672  |
| 51 | 6 | 0 | -2.872177  | 9.047612  | 3.551969  |
| 52 | 6 | 0 | -0.744983  | 7.764470  | 0.046494  |
| 53 | 6 | 0 | -3.467468  | 6.943857  | 0.454928  |
| 54 | 6 | 0 | -2.811589  | 6.738556  | -0.791021 |
| 55 | 6 | 0 | -1.457461  | 7.161222  | -0.958816 |
| 56 | 6 | 0 | -3.458304  | 5.972908  | -1.789432 |
| 57 | 6 | 0 | -4.642304  | 5.320008  | -1.528346 |
| 58 | 6 | 0 | -5.241517  | 5.395911  | -0.244966 |
| 59 | 6 | 0 | -4.672872  | 6.250259  | 0.698731  |
| 60 | 6 | 0 | -3.615411  | 9.523585  | 4.776369  |
| 61 | 6 | 0 | -10.918470 | 1.330213  | -3.368200 |
| 62 | 6 | 0 | -10.509316 | 0.553108  | -2.303766 |
| 63 | 6 | 0 | -9.565094  | 1.026498  | -1.362226 |
| 64 | 6 | 0 | -9.042397  | 2.345329  | -1.530935 |
| 65 | 6 | 0 | -9.484518  | 3.110629  | -2.633873 |
| 66 | 6 | 0 | -10.404890 | 2.632162  | -3.553656 |
| 67 | 6 | 0 | -9.151161  | 0.220503  | -0.225315 |
| 68 | 6 | 0 | -8.077082  | 2.864470  | -0.570029 |
| 69 | 6 | 0 | -7.888332  | 2.140301  | 0.639839  |
| 70 | 6 | 0 | -8.435692  | 0.828632  | 0.775989  |
| 71 | 6 | 0 | -7.012327  | 2.658415  | 1.621918  |
| 72 | 6 | 0 | -6.244460  | 3.772673  | 1.369693  |
| 73 | 6 | 0 | -6.309244  | 4.426543  | 0.112612  |
| 74 | 6 | 0 | -7.263133  | 3.993600  | -0.808213 |
| 75 | 6 | 0 | -10.867854 | 3.475710  | -4.716559 |
| 76 | 6 | 0 | -10.515576 | -2.163891 | 3.229760  |
| 77 | 6 | 0 | -10.232795 | -1.441222 | 2.088279  |
| 78 | 6 | 0 | -9.520666  | -2.014463 | 1.008415  |
| 79 | 6 | 0 | -9.098867  | -3.372920 | 1.122296  |
| 80 | 6 | 0 | -9.403820  | -4.081185 | 2.306289  |
| 81 | 6 | 0 | -10.099616 | -3.506871 | 3.359136  |
| 82 | 6 | 0 | -9.242177  | -1.268247 | -0.209073 |
| 83 | 6 | 0 | -8.366146  | -3.987513 | 0.023906  |
| 84 | 6 | 0 | -8.365965  | -3.319886 | -1.232366 |
| 85 | 6 | 0 | -8.808288  | -1.962574 | -1.311279 |
| 86 | 6 | 0 | -7.737448  | -3.942013 | -2.336807 |
| 87 | 6 | 0 | -6.984930  | -5.084594 | -2.171924 |
| 88 | 6 | 0 | -6.813502  | -5.654108 | -0.884453 |
| 89 | 6 | 0 | -7.569789  | -5.143233 | 0.169405  |
| 90 | 6 | 0 | -10.426908 | -4.289593 | 4.607553  |
| 91 | 6 | 0 | 10.515601  | -2.163826 | -3.229625 |
| 92 | 6 | 0 | 10.232785  | -1.441105 | -2.088188 |
| 93 | 6 | 0 | 9.520645   | -2.014301 | -1.008306 |
| 94 | 6 | 0 | 9.098872   | -3.372776 | -1.122120 |
| 95 | 6 | 0 | 9.403861   | -4.081093 | -2.306076 |
| 96 | 6 | 0 | 10.099673  | -3.506825 | -3.358934 |
| 97 | 6 | 0 | 9.242096   | -1.268020 | 0.209119  |

|     |   |   |           |           |           |
|-----|---|---|-----------|-----------|-----------|
| 98  | 6 | 0 | 8.366130  | -3.987321 | -0.023719 |
| 99  | 6 | 0 | 8.365853  | -3.319599 | 1.232503  |
| 100 | 6 | 0 | 8.808140  | -1.962276 | 1.311345  |
| 101 | 6 | 0 | 7.737303  | -3.941663 | 2.336964  |
| 102 | 6 | 0 | 6.984844  | -5.084284 | 2.172139  |
| 103 | 6 | 0 | 6.813523  | -5.653923 | 0.884704  |
| 104 | 6 | 0 | 7.569845  | -5.143104 | -0.169152 |
| 105 | 6 | 0 | 10.427099 | -4.289637 | -4.607259 |
| 106 | 6 | 0 | 10.918359 | 1.330486  | 3.368205  |
| 107 | 6 | 0 | 10.509213 | 0.553361  | 2.303784  |
| 108 | 6 | 0 | 9.565017  | 1.026743  | 1.362213  |
| 109 | 6 | 0 | 9.042325  | 2.345580  | 1.530890  |
| 110 | 6 | 0 | 9.484443  | 3.110906  | 2.633813  |
| 111 | 6 | 0 | 10.404798 | 2.632449  | 3.553619  |
| 112 | 6 | 0 | 9.151098  | 0.220734  | 0.225309  |
| 113 | 6 | 0 | 8.077017  | 2.864699  | 0.569965  |
| 114 | 6 | 0 | 7.888295  | 2.140520  | -0.639901 |
| 115 | 6 | 0 | 8.435659  | 0.828850  | -0.776024 |
| 116 | 6 | 0 | 7.012302  | 2.658626  | -1.621996 |
| 117 | 6 | 0 | 6.244413  | 3.772872  | -1.369782 |
| 118 | 6 | 0 | 6.309152  | 4.426735  | -0.112694 |
| 119 | 6 | 0 | 7.263041  | 3.993811  | 0.808141  |
| 120 | 6 | 0 | 10.867764 | 3.476020  | 4.716506  |
| 121 | 1 | 0 | 3.651867  | -8.775890 | 2.311697  |
| 122 | 1 | 0 | 5.908837  | -7.795910 | 2.428047  |
| 123 | 1 | 0 | 5.104151  | -5.517776 | -1.109885 |
| 124 | 1 | 0 | 1.331434  | -8.581130 | 1.492891  |
| 125 | 1 | 0 | -0.784393 | -6.210376 | -2.130885 |
| 126 | 1 | 0 | 0.011571  | -5.021569 | -4.108116 |
| 127 | 1 | 0 | 4.062922  | -5.620844 | -2.873766 |
| 128 | 1 | 0 | 3.681512  | -4.463373 | -4.903060 |
| 129 | 1 | 0 | 2.279800  | -5.081154 | -5.788728 |
| 130 | 1 | 0 | 2.176349  | -3.534281 | -4.951968 |
| 131 | 1 | 0 | -5.908842 | -7.796338 | -2.427513 |
| 132 | 1 | 0 | -5.103924 | -5.517420 | 1.109849  |
| 133 | 1 | 0 | -3.651855 | -8.776273 | -2.311107 |
| 134 | 1 | 0 | -1.331376 | -8.581434 | -1.492437 |
| 135 | 1 | 0 | -4.062526 | -5.619898 | 2.873594  |
| 136 | 1 | 0 | 0.784727  | -6.209701 | 2.130564  |
| 137 | 1 | 0 | -0.011085 | -5.020293 | 4.107477  |
| 138 | 1 | 0 | -3.680956 | -4.461619 | 4.902398  |
| 139 | 1 | 0 | -2.279448 | -5.079565 | 5.788271  |
| 140 | 1 | 0 | -2.175574 | -3.532873 | 4.951228  |
| 141 | 1 | 0 | 2.965890  | 5.843281  | 2.749531  |
| 142 | 1 | 0 | 5.071260  | 4.663861  | 2.278418  |
| 143 | 1 | 0 | 5.141560  | 6.327536  | -1.673816 |
| 144 | 1 | 0 | 0.947219  | 6.861432  | 1.869237  |
| 145 | 1 | 0 | -0.182411 | 9.326238  | -2.064531 |
| 146 | 1 | 0 | 1.034827  | 10.073440 | -4.062239 |
| 147 | 1 | 0 | 4.524918  | 7.977249  | -2.745790 |
| 148 | 1 | 0 | 4.651891  | 9.176595  | -4.776691 |
| 149 | 1 | 0 | 3.140198  | 9.160610  | -5.695609 |
| 150 | 1 | 0 | 3.627369  | 10.618208 | -4.834808 |
| 151 | 1 | 0 | -5.071388 | 4.663700  | -2.278510 |
| 152 | 1 | 0 | -5.141701 | 6.327387  | 1.673716  |
| 153 | 1 | 0 | -2.966050 | 5.843176  | -2.749646 |
| 154 | 1 | 0 | -0.947398 | 6.861384  | -1.869369 |
| 155 | 1 | 0 | -4.525094 | 7.977123  | 2.745680  |
| 156 | 1 | 0 | 0.182196  | 9.326229  | 2.064384  |

|     |   |   |            |           |           |
|-----|---|---|------------|-----------|-----------|
| 157 | 1 | 0 | -1.035045  | 10.073402 | 4.062101  |
| 158 | 1 | 0 | -3.627631  | 10.618110 | 4.834666  |
| 159 | 1 | 0 | -4.652072  | 9.176439  | 4.776598  |
| 160 | 1 | 0 | -3.140360  | 9.160558  | 5.695487  |
| 161 | 1 | 0 | -6.893872  | 2.115714  | 2.556046  |
| 162 | 1 | 0 | -5.511114  | 4.096421  | 2.100957  |
| 163 | 1 | 0 | -7.330735  | 4.504937  | -1.762461 |
| 164 | 1 | 0 | -8.133625  | 0.251320  | 1.644094  |
| 165 | 1 | 0 | -10.929861 | -0.437336 | -2.166965 |
| 166 | 1 | 0 | -11.656420 | 0.941441  | -4.065587 |
| 167 | 1 | 0 | -9.116639  | 4.124978  | -2.752654 |
| 168 | 1 | 0 | -10.618244 | 3.003271  | -5.673988 |
| 169 | 1 | 0 | -11.955436 | 3.611788  | -4.702016 |
| 170 | 1 | 0 | -10.406073 | 4.466543  | -4.702723 |
| 171 | 1 | 0 | -6.425281  | -5.486633 | -3.010643 |
| 172 | 1 | 0 | -7.463919  | -5.595164 | 1.150038  |
| 173 | 1 | 0 | -7.779201  | -3.453939 | -3.306998 |
| 174 | 1 | 0 | -8.620568  | -1.430987 | -2.239031 |
| 175 | 1 | 0 | -9.114716  | -5.124923 | 2.383501  |
| 176 | 1 | 0 | -10.576183 | -0.416008 | 2.001018  |
| 177 | 1 | 0 | -11.078846 | -1.698362 | 4.034786  |
| 178 | 1 | 0 | -10.061371 | -5.317936 | 4.543904  |
| 179 | 1 | 0 | -9.977410  | -3.828430 | 5.494939  |
| 180 | 1 | 0 | -11.508512 | -4.327942 | 4.781561  |
| 181 | 1 | 0 | 7.778988   | -3.453498 | 3.307112  |
| 182 | 1 | 0 | 6.425176   | -5.486277 | 3.010864  |
| 183 | 1 | 0 | 7.464061   | -5.595136 | -1.149746 |
| 184 | 1 | 0 | 8.620355   | -1.430625 | 2.239046  |
| 185 | 1 | 0 | 10.576141  | -0.415876 | -2.000977 |
| 186 | 1 | 0 | 11.078865  | -1.698323 | -4.034670 |
| 187 | 1 | 0 | 9.114769   | -5.124835 | -2.383253 |
| 188 | 1 | 0 | 10.060604  | -5.317664 | -4.544018 |
| 189 | 1 | 0 | 9.978633   | -3.827921 | -5.494875 |
| 190 | 1 | 0 | 11.508791  | -4.328943 | -4.780532 |
| 191 | 1 | 0 | 5.511076   | 4.096606  | -2.101062 |
| 192 | 1 | 0 | 7.330623   | 4.505140  | 1.762394  |
| 193 | 1 | 0 | 6.893867   | 2.115926  | -2.556127 |
| 194 | 1 | 0 | 8.133612   | 0.251524  | -1.644126 |
| 195 | 1 | 0 | 9.116574   | 4.125263  | 2.752558  |
| 196 | 1 | 0 | 10.929741  | -0.437096 | 2.167018  |
| 197 | 1 | 0 | 11.656290  | 0.941722  | 4.065616  |
| 198 | 1 | 0 | 10.406004  | 4.466862  | 4.702637  |
| 199 | 1 | 0 | 10.618131  | 3.003611  | 5.673944  |
| 200 | 1 | 0 | 11.955348  | 3.612074  | 4.701974  |

**Table S12.** Cartesian coordinate of  $E,R,E,R,E,S,E,S$  (10)

SCF Done: E(RB3LYP) = -4621.34281789 A.U. after 6 cycles

| Center<br>Number | Atomic<br>Number | Atomic<br>Type | Coordinates (Angstroms) |           |          |
|------------------|------------------|----------------|-------------------------|-----------|----------|
|                  |                  |                | X                       | Y         | Z        |
| 1                | 6                | 0              | -5.051874               | -5.247183 | 4.392185 |
| 2                | 6                | 0              | -4.943623               | -5.863121 | 3.162752 |
| 3                | 6                | 0              | -5.808816               | -5.537035 | 2.088672 |
| 4                | 6                | 0              | -6.752702               | -4.486596 | 2.292456 |
| 5                | 6                | 0              | -6.851078               | -3.894287 | 3.572672 |
| 6                | 6                | 0              | -6.032111               | -4.259423 | 4.627917 |
| 7                | 6                | 0              | -5.738334               | -6.200774 | 0.792995 |

|    |   |   |           |            |           |
|----|---|---|-----------|------------|-----------|
| 8  | 6 | 0 | -7.542082 | -4.005761  | 1.169036  |
| 9  | 6 | 0 | -7.549990 | -4.761897  | -0.034186 |
| 10 | 6 | 0 | -6.652631 | -5.869379  | -0.173635 |
| 11 | 6 | 0 | -8.321604 | -4.293966  | -1.126438 |
| 12 | 6 | 0 | -8.920977 | -3.051776  | -1.096096 |
| 13 | 6 | 0 | -8.784917 | -2.214704  | 0.040503  |
| 14 | 6 | 0 | -8.165208 | -2.740173  | 1.171346  |
| 15 | 6 | 0 | -6.168320 | -3.625213  | 5.990404  |
| 16 | 1 | 0 | -8.378969 | -4.902556  | -2.025317 |
| 17 | 1 | 0 | -9.459162 | -2.688561  | -1.966667 |
| 18 | 1 | 0 | -8.025809 | -2.090390  | 2.027072  |
| 19 | 1 | 0 | -6.617939 | -6.380063  | -1.132432 |
| 20 | 1 | 0 | -4.183496 | -6.619731  | 3.020608  |
| 21 | 1 | 0 | -4.375688 | -5.532857  | 5.194252  |
| 22 | 1 | 0 | -7.607842 | -3.135557  | 3.744113  |
| 23 | 1 | 0 | -5.228154 | -3.159206  | 6.307542  |
| 24 | 1 | 0 | -6.943895 | -2.854689  | 5.998442  |
| 25 | 1 | 0 | -6.428188 | -4.369724  | 6.752236  |
| 26 | 6 | 0 | -4.667097 | -10.119353 | 2.583038  |
| 27 | 6 | 0 | -5.042803 | -8.951797  | 1.951804  |
| 28 | 6 | 0 | -4.149280 | -8.250047  | 1.108572  |
| 29 | 6 | 0 | -2.836101 | -8.778288  | 0.914517  |
| 30 | 6 | 0 | -2.487765 | -9.975856  | 1.579855  |
| 31 | 6 | 0 | -3.371368 | -10.653906 | 2.405649  |
| 32 | 6 | 0 | -4.549028 | -7.032904  | 0.428601  |
| 33 | 6 | 0 | -1.903388 | -8.080981  | 0.037370  |
| 34 | 6 | 0 | -2.417831 | -7.043901  | -0.789770 |
| 35 | 6 | 0 | -3.734578 | -6.539723  | -0.556183 |
| 36 | 6 | 0 | -1.562686 | -6.416253  | -1.723300 |
| 37 | 6 | 0 | -0.214992 | -6.695228  | -1.745287 |
| 38 | 6 | 0 | 0.348410  | -7.606183  | -0.815459 |
| 39 | 6 | 0 | -0.510569 | -8.321344  | 0.017702  |
| 40 | 6 | 0 | -2.978541 | -11.940254 | 3.090807  |
| 41 | 1 | 0 | 0.441268  | -6.138212  | -2.405939 |
| 42 | 1 | 0 | -0.082167 | -9.033285  | 0.715547  |
| 43 | 1 | 0 | -1.971976 | -5.649633  | -2.375882 |
| 44 | 1 | 0 | -4.036630 | -5.647827  | -1.097260 |
| 45 | 1 | 0 | -1.503066 | -10.402322 | 1.415569  |
| 46 | 1 | 0 | -6.044724 | -8.557753  | 2.089886  |
| 47 | 1 | 0 | -5.378769 | -10.641898 | 3.217390  |
| 48 | 1 | 0 | -1.949490 | -12.223194 | 2.853791  |
| 49 | 1 | 0 | -3.059421 | -11.851105 | 4.180522  |
| 50 | 1 | 0 | -3.631627 | -12.767561 | 2.789339  |
| 51 | 6 | 0 | 4.335517  | 8.325498   | 4.709956  |
| 52 | 6 | 0 | 4.759202  | 7.906527   | 3.465039  |
| 53 | 6 | 0 | 3.858202  | 7.781234   | 2.381178  |
| 54 | 6 | 0 | 2.486319  | 8.107456   | 2.601525  |
| 55 | 6 | 0 | 2.088459  | 8.530665   | 3.889709  |
| 56 | 6 | 0 | 2.980273  | 8.643822   | 4.945166  |
| 57 | 6 | 0 | 4.301612  | 7.364569   | 1.059873  |
| 58 | 6 | 0 | 1.539069  | 7.997282   | 1.500504  |
| 59 | 6 | 0 | 2.059777  | 7.850193   | 0.184722  |
| 60 | 6 | 0 | 3.441316  | 7.530644   | 0.002909  |
| 61 | 6 | 0 | 1.162217  | 7.831779   | -0.908770 |
| 62 | 6 | 0 | -0.200381 | 7.794599   | -0.706762 |
| 63 | 6 | 0 | -0.733144 | 7.760034   | 0.606784  |
| 64 | 6 | 0 | 0.140899  | 7.928712   | 1.679521  |
| 65 | 6 | 0 | 2.531791  | 9.110301   | 6.308826  |
| 66 | 1 | 0 | 1.564763  | 7.759672   | -1.915721 |

|     |   |   |           |           |           |
|-----|---|---|-----------|-----------|-----------|
| 67  | 1 | 0 | -0.869365 | 7.680527  | -1.553902 |
| 68  | 1 | 0 | -0.265490 | 7.924162  | 2.685410  |
| 69  | 1 | 0 | 3.760817  | 7.250544  | -0.996094 |
| 70  | 1 | 0 | 5.807864  | 7.683594  | 3.300345  |
| 71  | 1 | 0 | 5.056580  | 8.425729  | 5.517444  |
| 72  | 1 | 0 | 1.052794  | 8.811341  | 4.054545  |
| 73  | 1 | 0 | 2.707342  | 8.340338  | 7.069458  |
| 74  | 1 | 0 | 3.082951  | 10.003196 | 6.625800  |
| 75  | 1 | 0 | 1.465916  | 9.353067  | 6.319305  |
| 76  | 6 | 0 | 7.269596  | 8.015911  | -2.149460 |
| 77  | 6 | 0 | 6.432426  | 7.878286  | -1.061033 |
| 78  | 6 | 0 | 6.386803  | 6.679935  | -0.309938 |
| 79  | 6 | 0 | 7.240022  | 5.603044  | -0.700475 |
| 80  | 6 | 0 | 8.082332  | 5.780587  | -1.821311 |
| 81  | 6 | 0 | 8.113475  | 6.958187  | -2.552335 |
| 82  | 6 | 0 | 5.527813  | 6.540340  | 0.854748  |
| 83  | 6 | 0 | 7.222119  | 4.360202  | 0.060511  |
| 84  | 6 | 0 | 6.556897  | 4.359947  | 1.318000  |
| 85  | 6 | 0 | 5.721407  | 5.460214  | 1.679486  |
| 86  | 6 | 0 | 6.588959  | 3.189670  | 2.111788  |
| 87  | 6 | 0 | 7.125792  | 2.018536  | 1.626152  |
| 88  | 6 | 0 | 7.655329  | 1.956486  | 0.311697  |
| 89  | 6 | 0 | 7.747902  | 3.140787  | -0.419056 |
| 90  | 6 | 0 | 9.032630  | 7.125098  | -3.737893 |
| 91  | 1 | 0 | 7.051686  | 1.109042  | 2.213282  |
| 92  | 1 | 0 | 8.172730  | 3.102414  | -1.416420 |
| 93  | 1 | 0 | 6.107231  | 3.204601  | 3.085881  |
| 94  | 1 | 0 | 5.106678  | 5.348193  | 2.567044  |
| 95  | 1 | 0 | 8.756717  | 4.978696  | -2.105278 |
| 96  | 1 | 0 | 5.805752  | 8.709071  | -0.755109 |
| 97  | 1 | 0 | 7.291017  | 8.955578  | -2.695921 |
| 98  | 1 | 0 | 9.642718  | 6.232767  | -3.901178 |
| 99  | 1 | 0 | 8.465375  | 7.315748  | -4.656610 |
| 100 | 1 | 0 | 9.710804  | 7.975105  | -3.599642 |
| 101 | 6 | 0 | 9.456507  | -5.236422 | 2.162042  |
| 102 | 6 | 0 | 8.628544  | -5.376499 | 1.066883  |
| 103 | 6 | 0 | 8.202716  | -4.256911 | 0.313432  |
| 104 | 6 | 0 | 8.658268  | -2.962147 | 0.708851  |
| 105 | 6 | 0 | 9.504049  | -2.858248 | 1.836231  |
| 106 | 6 | 0 | 9.908902  | -3.962761 | 2.569849  |
| 107 | 6 | 0 | 7.352791  | -4.401339 | -0.857632 |
| 108 | 6 | 0 | 8.245060  | -1.791187 | -0.054078 |
| 109 | 6 | 0 | 7.625593  | -2.004749 | -1.316732 |
| 110 | 6 | 0 | 7.193052  | -3.315688 | -1.682451 |
| 111 | 6 | 0 | 7.284432  | -0.886216 | -2.112441 |
| 112 | 6 | 0 | 7.410030  | 0.395147  | -1.624614 |
| 113 | 6 | 0 | 7.879600  | 0.623695  | -0.305766 |
| 114 | 6 | 0 | 8.343916  | -0.467816 | 0.427819  |
| 115 | 6 | 0 | 10.822830 | -3.823857 | 3.763014  |
| 116 | 1 | 0 | 6.841404  | -1.055224 | -3.090355 |
| 117 | 1 | 0 | 7.051025  | 1.232322  | -2.214235 |
| 118 | 1 | 0 | 8.724901  | -0.295096 | 1.428652  |
| 119 | 1 | 0 | 6.580846  | -3.407171 | -2.574053 |
| 120 | 1 | 0 | 8.307402  | -6.365367 | 0.757831  |
| 121 | 1 | 0 | 9.777006  | -6.118984 | 2.710148  |
| 122 | 1 | 0 | 9.880350  | -1.881370 | 2.123526  |
| 123 | 1 | 0 | 10.339984 | -4.187691 | 4.677710  |
| 124 | 1 | 0 | 11.740424 | -4.409089 | 3.632391  |
| 125 | 1 | 0 | 11.110523 | -2.782284 | 3.928834  |



|     |   |   |           |           |           |
|-----|---|---|-----------|-----------|-----------|
| 126 | 6 | 0 | 6.806334  | -6.465986 | -4.720441 |
| 127 | 6 | 0 | 7.069919  | -5.935308 | -3.473932 |
| 128 | 6 | 0 | 6.175437  | -6.110675 | -2.391605 |
| 129 | 6 | 0 | 4.982916  | -6.862300 | -2.615406 |
| 130 | 6 | 0 | 4.744953  | -7.388064 | -3.905282 |
| 131 | 6 | 0 | 5.627092  | -7.204724 | -4.959018 |
| 132 | 6 | 0 | 6.458940  | -5.576707 | -1.068397 |
| 133 | 6 | 0 | 4.049522  | -7.067962 | -1.516091 |
| 134 | 6 | 0 | 4.493735  | -6.764282 | -0.199049 |
| 135 | 6 | 0 | 5.696983  | -6.015160 | -0.013838 |
| 136 | 6 | 0 | 3.638336  | -7.041358 | 0.893266  |
| 137 | 6 | 0 | 2.337274  | -7.446776 | 0.689532  |
| 138 | 6 | 0 | 1.822559  | -7.582207 | -0.624654 |
| 139 | 6 | 0 | 2.704442  | -7.455193 | -1.696802 |
| 140 | 6 | 0 | 5.356856  | -7.790354 | -6.323687 |
| 141 | 1 | 0 | 1.667151  | -7.558469 | 1.536069  |
| 142 | 1 | 0 | 2.318453  | -7.579841 | -2.703085 |
| 143 | 1 | 0 | 3.995595  | -6.846270 | 1.900999  |
| 144 | 1 | 0 | 5.906948  | -5.649581 | 0.986502  |
| 145 | 1 | 0 | 3.855657  | -7.987808 | -4.072817 |
| 146 | 1 | 0 | 7.989947  | -5.385772 | -3.306528 |
| 147 | 1 | 0 | 7.522241  | -6.326072 | -5.526610 |
| 148 | 1 | 0 | 4.414196  | -8.343637 | -6.343436 |
| 149 | 1 | 0 | 5.301829  | -7.006644 | -7.088375 |
| 150 | 1 | 0 | 6.155460  | -8.477054 | -6.627758 |
| 151 | 6 | 0 | -6.528707 | 3.331984  | -4.395598 |
| 152 | 6 | 0 | -6.612818 | 3.948378  | -3.164545 |
| 153 | 6 | 0 | -7.314346 | 3.358517  | -2.083570 |
| 154 | 6 | 0 | -7.868732 | 2.059023  | -2.282864 |
| 155 | 6 | 0 | -7.783263 | 1.468033  | -3.564597 |
| 156 | 6 | 0 | -7.138204 | 2.079960  | -4.626200 |
| 157 | 6 | 0 | -7.450026 | 4.008162  | -0.785913 |
| 158 | 6 | 0 | -8.448302 | 1.347304  | -1.154191 |
| 159 | 6 | 0 | -8.690624 | 2.059639  | 0.051375  |
| 160 | 6 | 0 | -8.199119 | 3.397906  | 0.187108  |
| 161 | 6 | 0 | -9.259174 | 1.366412  | 1.148431  |
| 162 | 6 | 0 | -9.422521 | -0.003079 | 1.119342  |
| 163 | 6 | 0 | -9.030723 | -0.750501 | -0.020359 |
| 164 | 6 | 0 | -8.625684 | -0.052190 | -1.154963 |
| 165 | 6 | 0 | -7.075335 | 1.437069  | -5.989979 |
| 166 | 1 | 0 | -9.503522 | 1.923145  | 2.049533  |
| 167 | 1 | 0 | -9.805818 | -0.521729 | 1.993153  |
| 168 | 1 | 0 | -8.289787 | -0.621505 | -2.013504 |
| 169 | 1 | 0 | -8.322509 | 3.891758  | 1.147400  |
| 170 | 1 | 0 | -6.137897 | 4.910591  | -3.026939 |
| 171 | 1 | 0 | -5.990559 | 3.822467  | -5.203037 |
| 172 | 1 | 0 | -8.255219 | 0.505089  | -3.731569 |
| 173 | 1 | 0 | -7.557262 | 2.064849  | -6.748736 |
| 174 | 1 | 0 | -6.037964 | 1.287830  | -6.311502 |
| 175 | 1 | 0 | -7.571876 | 0.463036  | -5.997784 |
| 176 | 6 | 0 | -7.709979 | 8.064189  | -2.573955 |
| 177 | 6 | 0 | -7.685283 | 6.837556  | -1.943416 |
| 178 | 6 | 0 | -6.608221 | 6.460792  | -1.106838 |
| 179 | 6 | 0 | -5.534603 | 7.384427  | -0.918543 |
| 180 | 6 | 0 | -5.595188 | 8.630776  | -1.582809 |
| 181 | 6 | 0 | -6.654893 | 8.988028  | -2.402419 |
| 182 | 6 | 0 | -6.590485 | 5.179572  | -0.427283 |
| 183 | 6 | 0 | -4.422244 | 7.025499  | -0.046993 |
| 184 | 6 | 0 | -4.571117 | 5.878340  | 0.781276  |

|     |   |   |           |           |           |
|-----|---|---|-----------|-----------|-----------|
| 185 | 6 | 0 | -5.655517 | 4.976038  | 0.552980  |
| 186 | 6 | 0 | -3.555758 | 5.560785  | 1.711215  |
| 187 | 6 | 0 | -2.370797 | 6.260740  | 1.729284  |
| 188 | 6 | 0 | -2.135266 | 7.304679  | 0.798409  |
| 189 | 6 | 0 | -3.181516 | 7.702836  | -0.032358 |
| 190 | 6 | 0 | -6.701859 | 10.332400 | -3.087100 |
| 191 | 1 | 0 | -1.567766 | 5.946739  | 2.388042  |
| 192 | 1 | 0 | -3.008343 | 8.514651  | -0.731210 |
| 193 | 1 | 0 | -3.693011 | 4.703258  | 2.364626  |
| 194 | 1 | 0 | -5.650867 | 4.034756  | 1.094696  |
| 195 | 1 | 0 | -4.799895 | 9.352120  | -1.422501 |
| 196 | 1 | 0 | -8.507549 | 6.141732  | -2.077210 |
| 197 | 1 | 0 | -8.556029 | 8.329472  | -3.203060 |
| 198 | 1 | 0 | -5.813075 | 10.928328 | -2.863051 |
| 199 | 1 | 0 | -6.765787 | 10.221633 | -4.175925 |
| 200 | 1 | 0 | -7.579947 | 10.908900 | -2.773203 |

**Table S13.** Cartesian coordinate of *E,R,Z,S,Z,R,E,S* (11)

SCF Done: E(RB3LYP) = -4621.34254559 A.U. after 14 cycles

| Center<br>Number | Atomic<br>Number | Atomic<br>Type | Coordinates (Angstroms) |           |           |
|------------------|------------------|----------------|-------------------------|-----------|-----------|
|                  |                  |                | X                       | Y         | Z         |
| 1                | 6                | 0              | -10.696057              | -2.475721 | -2.768311 |
| 2                | 6                | 0              | -10.317529              | -1.483689 | -1.886871 |
| 3                | 6                | 0              | -9.488560               | -1.760460 | -0.773722 |
| 4                | 6                | 0              | -9.048977               | -3.104444 | -0.574976 |
| 5                | 6                | 0              | -9.457023               | -4.093347 | -1.498512 |
| 6                | 6                | 0              | -10.266262              | -3.808404 | -2.587429 |
| 7                | 6                | 0              | -9.111693               | -0.725535 | 0.175270  |
| 8                | 6                | 0              | -8.196528               | -3.419382 | 0.563792  |
| 9                | 6                | 0              | -8.056287               | -2.437112 | 1.583534  |
| 10               | 6                | 0              | -8.523963               | -1.106583 | 1.355585  |
| 11               | 6                | 0              | -7.296793               | -2.748133 | 2.735755  |
| 12               | 6                | 0              | -6.577092               | -3.919763 | 2.815650  |
| 13               | 6                | 0              | -6.572862               | -4.838835 | 1.735478  |
| 14               | 6                | 0              | -7.433552               | -4.602846 | 0.664432  |
| 15               | 6                | 0              | -10.699038              | -4.886732 | -3.550830 |
| 16               | 1                | 0              | -7.223265               | -2.009123 | 3.529276  |
| 17               | 1                | 0              | -5.926885               | -4.094698 | 3.666837  |
| 18               | 1                | 0              | -7.452642               | -5.319572 | -0.149586 |
| 19               | 1                | 0              | -8.256655               | -0.351100 | 2.088010  |
| 20               | 1                | 0              | -10.673656              | -0.469581 | -2.032332 |
| 21               | 1                | 0              | -11.345895              | -2.231973 | -3.605200 |
| 22               | 1                | 0              | -9.154164               | -5.122878 | -1.334860 |
| 23               | 1                | 0              | -11.791355              | -4.970172 | -3.590968 |
| 24               | 1                | 0              | -10.299053              | -5.863434 | -3.265823 |
| 25               | 1                | 0              | -10.358334              | -4.669243 | -4.570009 |
| 26               | 6                | 0              | -10.696156              | 2.474840  | 2.768747  |
| 27               | 6                | 0              | -10.317573              | 1.482835  | 1.887302  |
| 28               | 6                | 0              | -9.488718               | 1.759683  | 0.774086  |
| 29               | 6                | 0              | -9.049333               | 3.103722  | 0.575262  |
| 30               | 6                | 0              | -9.457419               | 4.092593  | 1.498817  |
| 31               | 6                | 0              | -10.266532              | 3.807574  | 2.587803  |
| 32               | 6                | 0              | -9.111770               | 0.724788  | -0.174902 |
| 33               | 6                | 0              | -8.197009               | 3.418737  | -0.563564 |
| 34               | 6                | 0              | -8.056736               | 2.436474  | -1.583310 |
| 35               | 6                | 0              | -8.524210               | 1.105890  | -1.355289 |

|    |   |   |            |           |           |
|----|---|---|------------|-----------|-----------|
| 36 | 6 | 0 | -7.297392  | 2.747590  | -2.735607 |
| 37 | 6 | 0 | -6.577835  | 3.919304  | -2.815574 |
| 38 | 6 | 0 | -6.573604  | 4.838370  | -1.735390 |
| 39 | 6 | 0 | -7.434182  | 4.602289  | -0.664278 |
| 40 | 6 | 0 | -10.699371 | 4.885870  | 3.551211  |
| 41 | 1 | 0 | -5.927734  | 4.094319  | -3.666826 |
| 42 | 1 | 0 | -7.453287  | 5.319017  | 0.149740  |
| 43 | 1 | 0 | -7.223849  | 2.008585  | -3.529133 |
| 44 | 1 | 0 | -8.256878  | 0.350422  | -2.087724 |
| 45 | 1 | 0 | -9.154690  | 5.122156  | 1.335121  |
| 46 | 1 | 0 | -10.673564 | 0.468686  | 2.032806  |
| 47 | 1 | 0 | -11.345895 | 2.231032  | 3.605695  |
| 48 | 1 | 0 | -10.299421 | 5.862592  | 3.266224  |
| 49 | 1 | 0 | -10.358680 | 4.668380  | 4.570393  |
| 50 | 1 | 0 | -11.791693 | 4.969268  | 3.591327  |
| 51 | 6 | 0 | 10.653579  | -0.899994 | 3.674371  |
| 52 | 6 | 0 | 10.353759  | -0.444574 | 2.406045  |
| 53 | 6 | 0 | 9.521077   | -1.183212 | 1.533170  |
| 54 | 6 | 0 | 8.997280   | -2.429179 | 1.992556  |
| 55 | 6 | 0 | 9.321564   | -2.861546 | 3.297822  |
| 56 | 6 | 0 | 10.133822  | -2.124656 | 4.146471  |
| 57 | 6 | 0 | 9.218690   | -0.721351 | 0.186272  |
| 58 | 6 | 0 | 8.150616   | -3.219293 | 1.108404  |
| 59 | 6 | 0 | 8.129177   | -2.873918 | -0.271245 |
| 60 | 6 | 0 | 8.664797   | -1.618294 | -0.694144 |
| 61 | 6 | 0 | 7.394640   | -3.683384 | -1.168960 |
| 62 | 6 | 0 | 6.573310   | -4.687586 | -0.705529 |
| 63 | 6 | 0 | 6.436108   | -4.921814 | 0.686410  |
| 64 | 6 | 0 | 7.278211   | -4.233255 | 1.559010  |
| 65 | 6 | 0 | 10.476152  | -2.615168 | 5.532249  |
| 66 | 1 | 0 | 7.415268   | -3.442975 | -2.228664 |
| 67 | 1 | 0 | 5.938111   | -5.228411 | -1.399780 |
| 68 | 1 | 0 | 7.193415   | -4.425909 | 2.623552  |
| 69 | 1 | 0 | 8.454395   | -1.308994 | -1.712793 |
| 70 | 1 | 0 | 10.778471  | 0.490065  | 2.055497  |
| 71 | 1 | 0 | 11.310426  | -0.315441 | 4.313837  |
| 72 | 1 | 0 | 8.951313   | -3.823244 | 3.639417  |
| 73 | 1 | 0 | 10.112993  | -1.921594 | 6.299919  |
| 74 | 1 | 0 | 11.560399  | -2.701709 | 5.667863  |
| 75 | 1 | 0 | 10.034297  | -3.595014 | 5.731941  |
| 76 | 6 | 0 | 10.653694  | 0.900959  | -3.673930 |
| 77 | 6 | 0 | 10.353857  | 0.445524  | -2.405613 |
| 78 | 6 | 0 | 9.521008   | 1.184055  | -1.532810 |
| 79 | 6 | 0 | 8.997053   | 2.429932  | -1.992262 |
| 80 | 6 | 0 | 9.321354   | 2.862316  | -3.297515 |
| 81 | 6 | 0 | 10.133787  | 2.125526  | -4.146095 |
| 82 | 6 | 0 | 9.218608   | 0.722191  | -0.185903 |
| 83 | 6 | 0 | 8.150226   | 3.219950  | -1.108172 |
| 84 | 6 | 0 | 8.128784   | 2.874628  | 0.271496  |
| 85 | 6 | 0 | 8.664564   | 1.619087  | 0.694460  |
| 86 | 6 | 0 | 7.394094   | 3.684020  | 1.169146  |
| 87 | 6 | 0 | 6.572628   | 4.688085  | 0.705642  |
| 88 | 6 | 0 | 6.435441   | 4.922223  | -0.686305 |
| 89 | 6 | 0 | 7.277682   | 4.233751  | -1.558850 |
| 90 | 6 | 0 | 10.476100  | 2.616050  | -5.531873 |
| 91 | 1 | 0 | 5.937314   | 5.228836  | 1.399846  |
| 92 | 1 | 0 | 7.192888   | 4.426353  | -2.623400 |
| 93 | 1 | 0 | 7.414703   | 3.443651  | 2.228859  |
| 94 | 1 | 0 | 8.454155   | 1.309791  | 1.713109  |

|     |   |   |           |           |           |
|-----|---|---|-----------|-----------|-----------|
| 95  | 1 | 0 | 8.950979  | 3.823947  | -3.639163 |
| 96  | 1 | 0 | 10.778685 | -0.489044 | -2.055016 |
| 97  | 1 | 0 | 11.310682 | 0.316493  | -4.313330 |
| 98  | 1 | 0 | 10.034258 | 3.595907  | -5.731541 |
| 99  | 1 | 0 | 10.112906 | 1.922497  | -6.299548 |
| 100 | 1 | 0 | 11.560344 | 2.702565  | -5.667510 |
| 101 | 6 | 0 | 1.770580  | 10.664550 | 1.292327  |
| 102 | 6 | 0 | 0.950409  | 9.780591  | 0.622354  |
| 103 | 6 | 0 | 1.478128  | 8.656831  | -0.056181 |
| 104 | 6 | 0 | 2.890943  | 8.449266  | -0.037334 |
| 105 | 6 | 0 | 3.698574  | 9.376135  | 0.660281  |
| 106 | 6 | 0 | 3.170192  | 10.474170 | 1.321876  |
| 107 | 6 | 0 | 0.619955  | 7.737158  | -0.778433 |
| 108 | 6 | 0 | 3.456025  | 7.300603  | -0.734427 |
| 109 | 6 | 0 | 2.612032  | 6.582040  | -1.626592 |
| 110 | 6 | 0 | 1.202057  | 6.819739  | -1.612355 |
| 111 | 6 | 0 | 3.157162  | 5.524548  | -2.389377 |
| 112 | 6 | 0 | 4.444087  | 5.086346  | -2.171381 |
| 113 | 6 | 0 | 5.245846  | 5.677135  | -1.161299 |
| 114 | 6 | 0 | 4.761359  | 6.809104  | -0.507662 |
| 115 | 6 | 0 | 4.056760  | 11.458225 | 2.045785  |
| 116 | 1 | 0 | 2.517136  | 5.005045  | -3.097604 |
| 117 | 1 | 0 | 4.813152  | 4.211924  | -2.697367 |
| 118 | 1 | 0 | 5.381474  | 7.275593  | 0.250751  |
| 119 | 1 | 0 | 0.570336  | 6.148368  | -2.186791 |
| 120 | 1 | 0 | -0.122147 | 9.945568  | 0.599734  |
| 121 | 1 | 0 | 1.337468  | 11.525112 | 1.796118  |
| 122 | 1 | 0 | 4.776332  | 9.245843  | 0.653594  |
| 123 | 1 | 0 | 3.794513  | 11.522396 | 3.108362  |
| 124 | 1 | 0 | 3.953644  | 12.467530 | 1.630450  |
| 125 | 1 | 0 | 5.110351  | 11.174580 | 1.977719  |
| 126 | 6 | 0 | -1.169676 | 6.743423  | 3.073468  |
| 127 | 6 | 0 | -0.624011 | 7.120049  | 1.864232  |
| 128 | 6 | 0 | -1.411530 | 7.212600  | 0.689402  |
| 129 | 6 | 0 | -2.782850 | 6.829761  | 0.776457  |
| 130 | 6 | 0 | -3.313242 | 6.472942  | 2.038106  |
| 131 | 6 | 0 | -2.541652 | 6.432164  | 3.187120  |
| 132 | 6 | 0 | -0.861191 | 7.640373  | -0.590420 |
| 133 | 6 | 0 | -3.584907 | 6.757911  | -0.435406 |
| 134 | 6 | 0 | -3.053834 | 7.290416  | -1.641770 |
| 135 | 6 | 0 | -1.695347 | 7.743474  | -1.672996 |
| 136 | 6 | 0 | -3.836519 | 7.218479  | -2.820245 |
| 137 | 6 | 0 | -5.028969 | 6.524893  | -2.845841 |
| 138 | 6 | 0 | -5.507137 | 5.871508  | -1.681756 |
| 139 | 6 | 0 | -4.804597 | 6.052294  | -0.493199 |
| 140 | 6 | 0 | -3.134051 | 6.061155  | 4.524459  |
| 141 | 1 | 0 | -5.587476 | 6.444487  | -3.773779 |
| 142 | 1 | 0 | -5.141296 | 5.513127  | 0.383880  |
| 143 | 1 | 0 | -3.452776 | 7.671243  | -3.730957 |
| 144 | 1 | 0 | -1.290592 | 8.080574  | -2.623706 |
| 145 | 1 | 0 | -4.368813 | 6.234508  | 2.117530  |
| 146 | 1 | 0 | 0.430637  | 7.356431  | 1.815631  |
| 147 | 1 | 0 | -0.534139 | 6.692053  | 3.954124  |
| 148 | 1 | 0 | -4.196373 | 5.817209  | 4.439290  |
| 149 | 1 | 0 | -3.035140 | 6.881461  | 5.245250  |
| 150 | 1 | 0 | -2.623896 | 5.192883  | 4.957536  |
| 151 | 6 | 0 | -1.169201 | -6.743848 | -3.073802 |
| 152 | 6 | 0 | -0.623401 | -7.120340 | -1.864596 |
| 153 | 6 | 0 | -1.410808 | -7.212806 | -0.689672 |

|     |   |   |           |            |           |
|-----|---|---|-----------|------------|-----------|
| 154 | 6 | 0 | -2.782147 | -6.830060  | -0.776620 |
| 155 | 6 | 0 | -3.312683 | -6.473366  | -2.038258 |
| 156 | 6 | 0 | -2.541209 | -6.432641  | -3.187342 |
| 157 | 6 | 0 | -0.860313 | -7.640422  | 0.590125  |
| 158 | 6 | 0 | -3.584100 | -6.758171  | 0.435314  |
| 159 | 6 | 0 | -3.052876 | -7.290561  | 1.641667  |
| 160 | 6 | 0 | -1.694355 | -7.743508  | 1.672796  |
| 161 | 6 | 0 | -3.835465 | -7.218626  | 2.820207  |
| 162 | 6 | 0 | -5.027975 | -6.525149  | 2.845866  |
| 163 | 6 | 0 | -5.506298 | -5.871867  | 1.681786  |
| 164 | 6 | 0 | -4.803845 | -6.052652  | 0.493181  |
| 165 | 6 | 0 | -3.133711 | -6.061642  | -4.524638 |
| 166 | 1 | 0 | -3.451594 | -7.671298  | 3.730912  |
| 167 | 1 | 0 | -5.586413 | -6.444746  | 3.773846  |
| 168 | 1 | 0 | -5.140667 | -5.513555  | -0.383892 |
| 169 | 1 | 0 | -1.289457 | -8.080486  | 2.623490  |
| 170 | 1 | 0 | 0.431257  | -7.356693  | -1.816068 |
| 171 | 1 | 0 | -0.533771 | -6.692550  | -3.954541 |
| 172 | 1 | 0 | -4.368276 | -6.235008  | -2.117594 |
| 173 | 1 | 0 | -3.033812 | -6.881511  | -5.245780 |
| 174 | 1 | 0 | -2.624357 | -5.192640  | -4.957206 |
| 175 | 1 | 0 | -4.196296 | -5.818794  | -4.439575 |
| 176 | 6 | 0 | 1.771574  | -10.664035 | -1.293250 |
| 177 | 6 | 0 | 0.951364  | -9.780227  | -0.623145 |
| 178 | 6 | 0 | 1.479046  | -8.656566  | 0.055610  |
| 179 | 6 | 0 | 2.891840  | -8.448959  | 0.036836  |
| 180 | 6 | 0 | 3.699526  | -9.375696  | -0.660912 |
| 181 | 6 | 0 | 3.171196  | -10.473619 | -1.322712 |
| 182 | 6 | 0 | 0.620840  | -7.737069  | 0.778026  |
| 183 | 6 | 0 | 3.456866  | -7.300408  | 0.734157  |
| 184 | 6 | 0 | 2.612849  | -6.582085  | 1.626495  |
| 185 | 6 | 0 | 1.202893  | -6.819842  | 1.612206  |
| 186 | 6 | 0 | 3.157956  | -5.524736  | 2.389509  |
| 187 | 6 | 0 | 4.444844  | -5.086416  | 2.171564  |
| 188 | 6 | 0 | 5.246602  | -5.676921  | 1.161305  |
| 189 | 6 | 0 | 4.762164  | -6.808778  | 0.507453  |
| 190 | 6 | 0 | 4.057805  | -11.457559 | -2.046727 |
| 191 | 1 | 0 | 4.813881  | -4.212095  | 2.697736  |
| 192 | 1 | 0 | 5.382266  | -7.275078  | -0.251087 |
| 193 | 1 | 0 | 2.517932  | -5.005440  | 3.097891  |
| 194 | 1 | 0 | 0.571119  | -6.148660  | 2.186809  |
| 195 | 1 | 0 | 4.777279  | -9.245367  | -0.654155 |
| 196 | 1 | 0 | -0.121191 | -9.945220  | -0.600584 |
| 197 | 1 | 0 | 1.338520  | -11.524517 | -1.797228 |
| 198 | 1 | 0 | 5.111378  | -11.173829 | -1.978706 |
| 199 | 1 | 0 | 3.795502  | -11.521708 | -3.109288 |
| 200 | 1 | 0 | 3.954809  | -12.466889 | -1.631419 |

**Table S14.** Cartesian coordinate of  $Z,R,Z,R,E,R,Z,S$  (12)

SCF Done: E(RB3LYP) = -4621.34215963 A.U. after 6 cycles

| Center Number | Atomic Number | Atomic Type | Coordinates (Angstroms) |          |           |
|---------------|---------------|-------------|-------------------------|----------|-----------|
|               |               |             | X                       | Y        | Z         |
| 1             | 6             | 0           | 10.118615               | 3.267794 | -2.836839 |
| 2             | 6             | 0           | 9.819943                | 2.226758 | -1.982489 |
| 3             | 6             | 0           | 8.901369                | 2.383882 | -0.917205 |
| 4             | 6             | 0           | 8.280412                | 3.659911 | -0.736761 |

|    |   |   |            |            |           |
|----|---|---|------------|------------|-----------|
| 5  | 6 | 0 | 8.615140   | 4.701492   | -1.632076 |
| 6  | 6 | 0 | 9.514253   | 4.533434   | -2.673570 |
| 7  | 6 | 0 | 8.614815   | 1.298074   | 0.002518  |
| 8  | 6 | 0 | 7.326047   | 3.852075   | 0.349677  |
| 9  | 6 | 0 | 7.206967   | 2.816199   | 1.318187  |
| 10 | 6 | 0 | 7.867561   | 1.568592   | 1.119695  |
| 11 | 6 | 0 | 6.314635   | 2.983017   | 2.400813  |
| 12 | 6 | 0 | 5.492173   | 4.081357   | 2.477341  |
| 13 | 6 | 0 | 5.521663   | 5.087290   | 1.475691  |
| 14 | 6 | 0 | 6.471038   | 4.972738   | 0.459500  |
| 15 | 6 | 0 | 9.858089   | 5.668199   | -3.607644 |
| 16 | 6 | 0 | 10.648561  | -1.438126  | 2.782554  |
| 17 | 6 | 0 | 10.134878  | -0.570978  | 1.839988  |
| 18 | 6 | 0 | 9.409134   | -1.042743  | 0.720402  |
| 19 | 6 | 0 | 9.212681   | -2.449583  | 0.585346  |
| 20 | 6 | 0 | 9.751319   | -3.307255  | 1.571037  |
| 21 | 6 | 0 | 10.462919  | -2.832841  | 2.662097  |
| 22 | 6 | 0 | 8.896207   | -0.137423  | -0.295179 |
| 23 | 6 | 0 | 8.460160   | -2.958039  | -0.552994 |
| 24 | 6 | 0 | 8.206834   | -2.071064  | -1.636682 |
| 25 | 6 | 0 | 8.439112   | -0.669144  | -1.474260 |
| 26 | 6 | 0 | 7.545670   | -2.567258  | -2.784615 |
| 27 | 6 | 0 | 7.007366   | -3.835396  | -2.799717 |
| 28 | 6 | 0 | 7.095648   | -4.671599  | -1.657048 |
| 29 | 6 | 0 | 7.882358   | -4.245288  | -0.588539 |
| 30 | 6 | 0 | 11.044411  | -3.770772  | 3.691907  |
| 31 | 6 | 0 | -11.277618 | 0.884102   | -2.776410 |
| 32 | 6 | 0 | -10.631775 | 0.092756   | -1.847550 |
| 33 | 6 | 0 | -9.641645  | 0.620782   | -0.986309 |
| 34 | 6 | 0 | -9.330704  | 2.010420   | -1.087736 |
| 35 | 6 | 0 | -10.007455 | 2.788311   | -2.053781 |
| 36 | 6 | 0 | -10.968231 | 2.255761   | -2.899898 |
| 37 | 6 | 0 | -8.965636  | -0.203643  | 0.005852  |
| 38 | 6 | 0 | -8.338866  | 2.590714   | -0.192159 |
| 39 | 6 | 0 | -7.938394  | 1.824486   | 0.937297  |
| 40 | 6 | 0 | -8.256462  | 0.432308   | 0.995487  |
| 41 | 6 | 0 | -7.063511  | 2.404880   | 1.885064  |
| 42 | 6 | 0 | -6.475628  | 3.628263   | 1.648784  |
| 43 | 6 | 0 | -6.718784  | 4.320900   | 0.435684  |
| 44 | 6 | 0 | -7.690349  | 3.821914   | -0.430415 |
| 45 | 6 | 0 | -11.687930 | 3.112358   | -3.913079 |
| 46 | 6 | 0 | -9.136098  | -3.182247  | 3.278899  |
| 47 | 6 | 0 | -9.244597  | -2.304614  | 2.218707  |
| 48 | 6 | 0 | -8.652676  | -2.583250  | 0.964453  |
| 49 | 6 | 0 | -7.942523  | -3.812446  | 0.812067  |
| 50 | 6 | 0 | -7.846456  | -4.683244  | 1.920335  |
| 51 | 6 | 0 | -8.423599  | -4.393808  | 3.147367  |
| 52 | 6 | 0 | -8.778356  | -1.672624  | -0.164891 |
| 53 | 6 | 0 | -7.348068  | -4.142201  | -0.476196 |
| 54 | 6 | 0 | -7.748954  | -3.375394  | -1.604083 |
| 55 | 6 | 0 | -8.453304  | -2.147489  | -1.412428 |
| 56 | 6 | 0 | -7.266390  | -3.738217  | -2.883970 |
| 57 | 6 | 0 | -6.288076  | -4.695950  | -3.023312 |
| 58 | 6 | 0 | -5.725334  | -5.328148  | -1.883795 |
| 59 | 6 | 0 | -6.318162  | -5.094560  | -0.643263 |
| 60 | 6 | 0 | -8.317142  | -5.346987  | 4.312828  |
| 61 | 6 | 0 | -1.238404  | -10.726974 | 1.295732  |
| 62 | 6 | 0 | -0.341696  | -9.884100  | 0.673051  |
| 63 | 6 | 0 | -0.779335  | -8.807171  | -0.133689 |

|     |   |   |           |            |           |
|-----|---|---|-----------|------------|-----------|
| 64  | 6 | 0 | -2.185703 | -8.606514  | -0.303379 |
| 65  | 6 | 0 | -3.071799 | -9.492287  | 0.351827  |
| 66  | 6 | 0 | -2.630582 | -10.541206 | 1.143806  |
| 67  | 6 | 0 | 0.166028  | -7.937322  | -0.805084 |
| 68  | 6 | 0 | -2.664256 | -7.516011  | -1.146776 |
| 69  | 6 | 0 | -1.705032 | -6.824494  | -1.937833 |
| 70  | 6 | 0 | -0.311659 | -7.053604  | -1.735143 |
| 71  | 6 | 0 | -2.134536 | -5.815742  | -2.826967 |
| 72  | 6 | 0 | -3.449831 | -5.420326  | -2.860716 |
| 73  | 6 | 0 | -4.407971 | -6.006800  | -1.992703 |
| 74  | 6 | 0 | -4.007426 | -7.071214  | -1.185654 |
| 75  | 6 | 0 | -3.601203 | -11.477223 | 1.822306  |
| 76  | 6 | 0 | 1.743137  | -6.759901  | 3.112932  |
| 77  | 6 | 0 | 1.266441  | -7.222613  | 1.904044  |
| 78  | 6 | 0 | 2.104906  | -7.328239  | 0.766859  |
| 79  | 6 | 0 | 3.450433  | -6.868301  | 0.886435  |
| 80  | 6 | 0 | 3.909508  | -6.419709  | 2.146198  |
| 81  | 6 | 0 | 3.090554  | -6.366657  | 3.261930  |
| 82  | 6 | 0 | 1.631217  | -7.841944  | -0.510893 |
| 83  | 6 | 0 | 4.294531  | -6.810143  | -0.297516 |
| 84  | 6 | 0 | 3.856337  | -7.463265  | -1.481164 |
| 85  | 6 | 0 | 2.525774  | -7.989291  | -1.539826 |
| 86  | 6 | 0 | 4.678570  | -7.409674  | -2.633539 |
| 87  | 6 | 0 | 5.800658  | -6.608026  | -2.672247 |
| 88  | 6 | 0 | 6.164651  | -5.824626  | -1.547695 |
| 89  | 6 | 0 | 5.444868  | -5.997017  | -0.367376 |
| 90  | 6 | 0 | 3.607657  | -5.899776  | 4.600546  |
| 91  | 6 | 0 | 0.996452  | 8.994679   | -3.290067 |
| 92  | 6 | 0 | 0.238871  | 8.890374   | -2.141058 |
| 93  | 6 | 0 | 0.768148  | 8.334297   | -0.952248 |
| 94  | 6 | 0 | 2.127703  | 7.897534   | -0.960146 |
| 95  | 6 | 0 | 2.870737  | 8.014888   | -2.156464 |
| 96  | 6 | 0 | 2.334656  | 8.546537   | -3.318960 |
| 97  | 6 | 0 | -0.021076 | 8.233256   | 0.267558  |
| 98  | 6 | 0 | 2.721235  | 7.369581   | 0.261084  |
| 99  | 6 | 0 | 2.005530  | 7.548833   | 1.476191  |
| 100 | 6 | 0 | 0.638806  | 7.961419   | 1.441113  |
| 101 | 6 | 0 | 2.615300  | 7.155771   | 2.690670  |
| 102 | 6 | 0 | 3.812222  | 6.476857   | 2.695690  |
| 103 | 6 | 0 | 4.449667  | 6.116431   | 1.478960  |
| 104 | 6 | 0 | 3.918852  | 6.622074   | 0.291783  |
| 105 | 6 | 0 | 3.153592  | 8.667981   | -4.580947 |
| 106 | 6 | 0 | -2.658260 | 10.194658  | 3.226603  |
| 107 | 6 | 0 | -1.871274 | 9.703341   | 2.204607  |
| 108 | 6 | 0 | -2.331005 | 8.680852   | 1.341229  |
| 109 | 6 | 0 | -3.652781 | 8.176299   | 1.537770  |
| 110 | 6 | 0 | -4.427240 | 8.699836   | 2.597683  |
| 111 | 6 | 0 | -3.958029 | 9.690205   | 3.446721  |
| 112 | 6 | 0 | -1.510726 | 8.166564   | 0.253289  |
| 113 | 6 | 0 | -4.175574 | 7.156500   | 0.638038  |
| 114 | 6 | 0 | -3.450737 | 6.893630   | -0.557255 |
| 115 | 6 | 0 | -2.121506 | 7.395850   | -0.704846 |
| 116 | 6 | 0 | -3.991234 | 5.995469   | -1.506427 |
| 117 | 6 | 0 | -5.128064 | 5.270474   | -1.226638 |
| 118 | 6 | 0 | -5.766044 | 5.389734   | 0.034309  |
| 119 | 6 | 0 | -5.312447 | 6.366376   | 0.918909  |
| 120 | 6 | 0 | -4.810069 | 10.237920  | 4.565689  |
| 121 | 1 | 0 | 6.239203  | 2.192774   | 3.142963  |
| 122 | 1 | 0 | 4.757225  | 4.137227   | 3.272111  |

|     |   |   |            |            |           |
|-----|---|---|------------|------------|-----------|
| 123 | 1 | 0 | 6.514823   | 5.749323   | -0.295959 |
| 124 | 1 | 0 | 7.654689   | 0.771514   | 1.825362  |
| 125 | 1 | 0 | 10.307964  | 1.266542   | -2.110984 |
| 126 | 1 | 0 | 10.837938  | 3.117325   | -3.638061 |
| 127 | 1 | 0 | 8.173912   | 5.682623   | -1.488590 |
| 128 | 1 | 0 | 9.586762   | 5.427519   | -4.642397 |
| 129 | 1 | 0 | 9.336284   | 6.588179   | -3.330810 |
| 130 | 1 | 0 | 10.934027  | 5.877680   | -3.600794 |
| 131 | 1 | 0 | 6.416900   | -4.158217  | -3.651207 |
| 132 | 1 | 0 | 7.976896   | -4.893048  | 0.276467  |
| 133 | 1 | 0 | 7.389353   | -1.900516  | -3.628567 |
| 134 | 1 | 0 | 8.077710   | -0.006666  | -2.255412 |
| 135 | 1 | 0 | 9.634842   | -4.380446  | 1.455392  |
| 136 | 1 | 0 | 10.300847  | 0.495991   | 1.942058  |
| 137 | 1 | 0 | 11.215946  | -1.044664  | 3.622393  |
| 138 | 1 | 0 | 10.640614  | -3.564775  | 4.690205  |
| 139 | 1 | 0 | 10.827153  | -4.815024  | 3.452028  |
| 140 | 1 | 0 | 12.133101  | -3.661783  | 3.759896  |
| 141 | 1 | 0 | -6.793179  | 1.832478   | 2.768512  |
| 142 | 1 | 0 | -5.735000  | 4.016212   | 2.341024  |
| 143 | 1 | 0 | -7.891565  | 4.361296   | -1.350365 |
| 144 | 1 | 0 | -7.764234  | -0.154414  | 1.764044  |
| 145 | 1 | 0 | -10.897533 | -0.955024  | -1.756568 |
| 146 | 1 | 0 | -12.044742 | 0.448914   | -3.412158 |
| 147 | 1 | 0 | -9.794971  | 3.851364   | -2.114180 |
| 148 | 1 | 0 | -11.537329 | 2.734431   | -4.931087 |
| 149 | 1 | 0 | -12.769203 | 3.120040   | -3.732380 |
| 150 | 1 | 0 | -11.336693 | 4.147233   | -3.885088 |
| 151 | 1 | 0 | -5.899835  | -4.929682  | -4.009602 |
| 152 | 1 | 0 | -5.881979  | -5.557358  | 0.235641  |
| 153 | 1 | 0 | -7.631749  | -3.200071  | -3.754693 |
| 154 | 1 | 0 | -8.562854  | -1.501797  | -2.277430 |
| 155 | 1 | 0 | -7.331654  | -5.631389  | 1.798720  |
| 156 | 1 | 0 | -9.812161  | -1.387611  | 2.335844  |
| 157 | 1 | 0 | -9.617311  | -2.944641  | 4.224427  |
| 158 | 1 | 0 | -7.771973  | -6.254586  | 4.040270  |
| 159 | 1 | 0 | -7.794084  | -4.883917  | 5.157909  |
| 160 | 1 | 0 | -9.307468  | -5.645799  | 4.675445  |
| 161 | 1 | 0 | -1.395464  | -5.309745  | -3.442329 |
| 162 | 1 | 0 | -3.742224  | -4.589335  | -3.492963 |
| 163 | 1 | 0 | -4.743938  | -7.534716  | -0.537608 |
| 164 | 1 | 0 | 0.385913   | -6.412769  | -2.265896 |
| 165 | 1 | 0 | 0.725584   | -10.045185 | 0.788509  |
| 166 | 1 | 0 | -0.871625  | -11.551316 | 1.902252  |
| 167 | 1 | 0 | -4.140934  | -9.369023  | 0.210371  |
| 168 | 1 | 0 | -3.430501  | -12.516558 | 1.518678  |
| 169 | 1 | 0 | -3.491520  | -11.441536 | 2.912705  |
| 170 | 1 | 0 | -4.637367  | -11.224247 | 1.582314  |
| 171 | 1 | 0 | 6.383069   | -6.536910  | -3.586195 |
| 172 | 1 | 0 | 5.691479   | -5.366392  | 0.478434  |
| 173 | 1 | 0 | 4.371935   | -7.957492  | -3.520956 |
| 174 | 1 | 0 | 2.180007   | -8.394447  | -2.487158 |
| 175 | 1 | 0 | 4.947535   | -6.120467  | 2.251224  |
| 176 | 1 | 0 | 0.228945   | -7.520807  | 1.826891  |
| 177 | 1 | 0 | 1.071663   | -6.703538  | 3.966204  |
| 178 | 1 | 0 | 4.657844   | -5.601276  | 4.543197  |
| 179 | 1 | 0 | 3.034285   | -5.041783  | 4.970359  |
| 180 | 1 | 0 | 3.524329   | -6.689133  | 5.356973  |
| 181 | 1 | 0 | 2.099362   | 7.357610   | 3.625747  |



|     |   |   |           |           |           |
|-----|---|---|-----------|-----------|-----------|
| 182 | 1 | 0 | 4.250416  | 6.175924  | 3.641381  |
| 183 | 1 | 0 | 4.379727  | 6.336141  | -0.647038 |
| 184 | 1 | 0 | 0.080443  | 7.903702  | 2.369749  |
| 185 | 1 | 0 | -0.781033 | 9.259019  | -2.135935 |
| 186 | 1 | 0 | 0.562038  | 9.440941  | -4.181241 |
| 187 | 1 | 0 | 3.912705  | 7.710554  | -2.159170 |
| 188 | 1 | 0 | 2.720209  | 8.073485  | -5.393956 |
| 189 | 1 | 0 | 3.194966  | 9.705728  | -4.931454 |
| 190 | 1 | 0 | 4.180049  | 8.324379  | -4.427495 |
| 191 | 1 | 0 | -5.481167 | 4.522965  | -1.929906 |
| 192 | 1 | 0 | -5.811870 | 6.469237  | 1.876850  |
| 193 | 1 | 0 | -3.452603 | 5.827963  | -2.435388 |
| 194 | 1 | 0 | -1.540398 | 7.016905  | -1.539114 |
| 195 | 1 | 0 | -5.442533 | 8.340757  | 2.733788  |
| 196 | 1 | 0 | -0.883297 | 10.119565 | 2.040858  |
| 197 | 1 | 0 | -2.278229 | 10.991008 | 3.861793  |
| 198 | 1 | 0 | -5.803151 | 9.780897  | 4.574232  |
| 199 | 1 | 0 | -4.348420 | 10.053259 | 5.542957  |
| 200 | 1 | 0 | -4.939701 | 11.322467 | 4.474016  |

**Table S15.** Cartesian coordinate of *E,R,E,R,E,R,E,S* (13)

SCF Done: E(RB3LYP) = -4621.34200105 A.U. after 5 cycles

| Center<br>Number | Atomic<br>Number | Atomic<br>Type | Coordinates (Angstroms) |           |           |
|------------------|------------------|----------------|-------------------------|-----------|-----------|
|                  |                  |                | X                       | Y         | Z         |
| 1                | 6                | 0              | 0.210515                | -5.313394 | -3.450508 |
| 2                | 6                | 0              | 0.344133                | -5.999320 | -2.261455 |
| 3                | 6                | 0              | -0.776344               | -6.552260 | -1.591821 |
| 4                | 6                | 0              | -2.065877               | -6.317878 | -2.152877 |
| 5                | 6                | 0              | -2.162988               | -5.632189 | -3.385441 |
| 6                | 6                | 0              | -1.054642               | -5.134445 | -4.049996 |
| 7                | 6                | 0              | -0.655454               | -7.326265 | -0.362475 |
| 8                | 6                | 0              | -3.247858               | -6.741107 | -1.419671 |
| 9                | 6                | 0              | -3.094114               | -7.608299 | -0.304587 |
| 10               | 6                | 0              | -1.775469               | -7.905505 | 0.174547  |
| 11               | 6                | 0              | -4.254651               | -8.011833 | 0.402791  |
| 12               | 6                | 0              | -5.492994               | -7.469338 | 0.120885  |
| 13               | 6                | 0              | -5.636285               | -6.493268 | -0.897702 |
| 14               | 6                | 0              | -4.522318               | -6.203017 | -1.682026 |
| 15               | 6                | 0              | -1.181157               | -4.417583 | -5.371724 |
| 16               | 6                | 0              | -0.211386               | -5.312492 | 3.449901  |
| 17               | 6                | 0              | -0.344974               | -5.998698 | 2.261005  |
| 18               | 6                | 0              | 0.775505                | -6.551893 | 1.591588  |
| 19               | 6                | 0              | 2.065015                | -6.317492 | 2.152681  |
| 20               | 6                | 0              | 2.162091                | -5.631529 | 3.385097  |
| 21               | 6                | 0              | 1.053740                | -5.133521 | 4.049447  |
| 22               | 6                | 0              | 0.654635                | -7.326193 | 0.362430  |
| 23               | 6                | 0              | 3.247018                | -6.740980 | 1.419663  |
| 24               | 6                | 0              | 3.093290                | -7.608354 | 0.304715  |
| 25               | 6                | 0              | 1.774649                | -7.905584 | -0.174430 |
| 26               | 6                | 0              | 4.253842                | -8.012108 | -0.402506 |
| 27               | 6                | 0              | 5.492222                | -7.469701 | -0.120574 |
| 28               | 6                | 0              | 5.635524                | -6.493514 | 0.897892  |
| 29               | 6                | 0              | 4.521511                | -6.202996 | 1.682053  |
| 30               | 6                | 0              | 1.180221                | -4.416366 | 5.371019  |
| 31               | 6                | 0              | -1.377486               | 9.371047  | 3.419711  |
| 32               | 6                | 0              | -0.743239               | 8.962971  | 2.264358  |

|    |   |   |            |           |           |
|----|---|---|------------|-----------|-----------|
| 33 | 6 | 0 | -1.394841  | 8.142307  | 1.312739  |
| 34 | 6 | 0 | -2.741820  | 7.744409  | 1.571814  |
| 35 | 6 | 0 | -3.358247  | 8.182644  | 2.765949  |
| 36 | 6 | 0 | -2.707034  | 8.981739  | 3.692514  |
| 37 | 6 | 0 | -0.741580  | 7.734909  | 0.079946  |
| 38 | 6 | 0 | -3.441117  | 6.905162  | 0.607585  |
| 39 | 6 | 0 | -2.845849  | 6.717165  | -0.671065 |
| 40 | 6 | 0 | -1.500590  | 7.141405  | -0.896983 |
| 41 | 6 | 0 | -3.540708  | 5.966175  | -1.648104 |
| 42 | 6 | 0 | -4.711378  | 5.309716  | -1.339446 |
| 43 | 6 | 0 | -5.245362  | 5.364623  | -0.026635 |
| 44 | 6 | 0 | -4.631336  | 6.204640  | 0.901148  |
| 45 | 6 | 0 | -3.393714  | 9.444039  | 4.954619  |
| 46 | 6 | 0 | 1.378448   | 9.370831  | -3.420040 |
| 47 | 6 | 0 | 0.744152   | 8.962841  | -2.264683 |
| 48 | 6 | 0 | 1.395675   | 8.142152  | -1.313031 |
| 49 | 6 | 0 | 2.742629   | 7.744143  | -1.572072 |
| 50 | 6 | 0 | 3.359105   | 8.182293  | -2.766214 |
| 51 | 6 | 0 | 2.707968   | 8.981408  | -3.692813 |
| 52 | 6 | 0 | 0.742367   | 7.734844  | -0.080232 |
| 53 | 6 | 0 | 3.441850   | 6.904880  | -0.607803 |
| 54 | 6 | 0 | 2.846549   | 6.716971  | 0.670844  |
| 55 | 6 | 0 | 1.501320   | 7.141321  | 0.896729  |
| 56 | 6 | 0 | 3.541337   | 5.965965  | 1.647922  |
| 57 | 6 | 0 | 4.711965   | 5.309411  | 1.339307  |
| 58 | 6 | 0 | 5.245979   | 5.364238  | 0.026505  |
| 59 | 6 | 0 | 4.632029   | 6.204268  | -0.901318 |
| 60 | 6 | 0 | 3.394703   | 9.443619  | -4.954921 |
| 61 | 6 | 0 | 11.155042  | 1.419779  | 2.873087  |
| 62 | 6 | 0 | 10.670006  | 0.603249  | 1.871740  |
| 63 | 6 | 0 | 9.653435   | 1.038789  | 0.989116  |
| 64 | 6 | 0 | 9.139417   | 2.362203  | 1.148869  |
| 65 | 6 | 0 | 9.659879   | 3.168229  | 2.186555  |
| 66 | 6 | 0 | 10.649736  | 2.725951  | 3.050656  |
| 67 | 6 | 0 | 9.155780   | 0.189982  | -0.081765 |
| 68 | 6 | 0 | 8.104388   | 2.846359  | 0.243957  |
| 69 | 6 | 0 | 7.831494   | 2.079838  | -0.922921 |
| 70 | 6 | 0 | 8.367507   | 0.762541  | -1.049151 |
| 71 | 6 | 0 | 6.889998   | 2.564686  | -1.860324 |
| 72 | 6 | 0 | 6.141603   | 3.689268  | -1.595472 |
| 73 | 6 | 0 | 6.291179   | 4.384662  | -0.368370 |
| 74 | 6 | 0 | 7.305987   | 3.982875  | 0.499823  |
| 75 | 6 | 0 | 11.194756  | 3.612394  | 4.143971  |
| 76 | 6 | 0 | 10.162926  | -2.341059 | -3.557012 |
| 77 | 6 | 0 | 10.005479  | -1.573020 | -2.420941 |
| 78 | 6 | 0 | 9.391945   | -2.092878 | -1.256757 |
| 79 | 6 | 0 | 8.939923   | -3.446059 | -1.279337 |
| 80 | 6 | 0 | 9.114106   | -4.201451 | -2.460562 |
| 81 | 6 | 0 | 9.712123   | -3.678526 | -3.596755 |
| 82 | 6 | 0 | 9.241941   | -1.298477 | -0.046781 |
| 83 | 6 | 0 | 8.315556   | -4.010316 | -0.091386 |
| 84 | 6 | 0 | 8.452569   | -3.300728 | 1.132781  |
| 85 | 6 | 0 | 8.916037   | -1.948768 | 1.118648  |
| 86 | 6 | 0 | 7.932337   | -3.878441 | 2.316338  |
| 87 | 6 | 0 | 7.146915   | -5.007963 | 2.265818  |
| 88 | 6 | 0 | 6.821714   | -5.607972 | 1.021089  |
| 89 | 6 | 0 | 7.479642   | -5.147842 | -0.118992 |
| 90 | 6 | 0 | 9.899437   | -4.510015 | -4.842420 |
| 91 | 6 | 0 | -10.162871 | -2.340077 | 3.557351  |

|     |   |   |            |           |           |
|-----|---|---|------------|-----------|-----------|
| 92  | 6 | 0 | -10.005402 | -1.572098 | 2.421243  |
| 93  | 6 | 0 | -9.392008  | -2.092073 | 1.257037  |
| 94  | 6 | 0 | -8.940151  | -3.445309 | 1.279636  |
| 95  | 6 | 0 | -9.114351  | -4.200637 | 2.460900  |
| 96  | 6 | 0 | -9.712228  | -3.677598 | 3.597113  |
| 97  | 6 | 0 | -9.241983  | -1.297735 | 0.047024  |
| 98  | 6 | 0 | -8.315934  | -4.009686 | 0.091664  |
| 99  | 6 | 0 | -8.452938  | -3.300125 | -1.132518 |
| 100 | 6 | 0 | -8.916231  | -1.948107 | -1.118404 |
| 101 | 6 | 0 | -7.932863  | -3.877956 | -2.316088 |
| 102 | 6 | 0 | -7.147587  | -5.007577 | -2.265579 |
| 103 | 6 | 0 | -6.822370  | -5.607582 | -1.020849 |
| 104 | 6 | 0 | -7.480162  | -5.147319 | 0.119257  |
| 105 | 6 | 0 | -9.899553  | -4.509015 | 4.842824  |
| 106 | 6 | 0 | -11.154955 | 1.420643  | -2.872816 |
| 107 | 6 | 0 | -10.669947 | 0.604091  | -1.871474 |
| 108 | 6 | 0 | -9.653274  | 1.039545  | -0.988925 |
| 109 | 6 | 0 | -9.139122  | 2.362900  | -1.148748 |
| 110 | 6 | 0 | -9.659557  | 3.168949  | -2.186430 |
| 111 | 6 | 0 | -10.649510 | 2.726751  | -3.050462 |
| 112 | 6 | 0 | -9.155646  | 0.190716  | 0.081949  |
| 113 | 6 | 0 | -8.103996  | 2.846975  | -0.243905 |
| 114 | 6 | 0 | -7.831107  | 2.080454  | 0.922973  |
| 115 | 6 | 0 | -8.367246  | 0.763216  | 1.049267  |
| 116 | 6 | 0 | -6.889514  | 2.565232  | 1.860315  |
| 117 | 6 | 0 | -6.141038  | 3.689745  | 1.595406  |
| 118 | 6 | 0 | -6.290620  | 4.385131  | 0.368299  |
| 119 | 6 | 0 | -7.305504  | 3.983416  | -0.499835 |
| 120 | 6 | 0 | -11.194458 | 3.613199  | -4.143808 |
| 121 | 1 | 0 | -4.147645  | -8.716875 | 1.223325  |
| 122 | 1 | 0 | -6.356734  | -7.760906 | 0.711328  |
| 123 | 1 | 0 | -4.609996  | -5.423901 | -2.428353 |
| 124 | 1 | 0 | -1.683733  | -8.510327 | 1.073031  |
| 125 | 1 | 0 | 1.329867   | -6.121154 | -1.831691 |
| 126 | 1 | 0 | 1.095230   | -4.910308 | -3.937242 |
| 127 | 1 | 0 | -3.139303  | -5.505000 | -3.841856 |
| 128 | 1 | 0 | -2.225053  | -4.337041 | -5.686433 |
| 129 | 1 | 0 | -0.768498  | -3.403653 | -5.314147 |
| 130 | 1 | 0 | -0.631780  | -4.941287 | -6.162944 |
| 131 | 1 | 0 | 6.355983   | -7.761438 | -0.710902 |
| 132 | 1 | 0 | 4.609230   | -5.423774 | 2.428265  |
| 133 | 1 | 0 | 4.146830   | -8.717263 | -1.222942 |
| 134 | 1 | 0 | 1.682928   | -8.510602 | -1.072783 |
| 135 | 1 | 0 | 3.138380   | -5.504315 | 3.841559  |
| 136 | 1 | 0 | -1.330687  | -6.120549 | 1.831196  |
| 137 | 1 | 0 | -1.096103  | -4.909204 | 3.936463  |
| 138 | 1 | 0 | 2.224100   | -4.335848 | 5.685789  |
| 139 | 1 | 0 | 0.767660   | -3.402411 | 5.313179  |
| 140 | 1 | 0 | 0.630736   | -4.939838 | 6.162318  |
| 141 | 1 | 0 | -3.095828  | 5.850790  | -2.632970 |
| 142 | 1 | 0 | -5.178540  | 4.665469  | -2.077324 |
| 143 | 1 | 0 | -5.050393  | 6.264504  | 1.899791  |
| 144 | 1 | 0 | -1.033998  | 6.849922  | -1.833080 |
| 145 | 1 | 0 | 0.271725   | 9.288422  | 2.064183  |
| 146 | 1 | 0 | -0.852596  | 10.012564 | 4.123264  |
| 147 | 1 | 0 | -4.391946  | 7.911134  | 2.955000  |
| 148 | 1 | 0 | -4.425211  | 9.085321  | 5.004540  |
| 149 | 1 | 0 | -2.869662  | 9.082372  | 5.847225  |
| 150 | 1 | 0 | -3.415117  | 10.538124 | 5.018829  |

|     |   |   |            |           |           |
|-----|---|---|------------|-----------|-----------|
| 151 | 1 | 0 | 5.179070   | 4.665159  | 2.077217  |
| 152 | 1 | 0 | 5.051113   | 6.264071  | -1.899953 |
| 153 | 1 | 0 | 3.096432   | 5.850647  | 2.632785  |
| 154 | 1 | 0 | 1.034694   | 6.849909  | 1.832832  |
| 155 | 1 | 0 | 4.392786   | 7.910697  | -2.955243 |
| 156 | 1 | 0 | -0.270787  | 9.288381  | -2.064531 |
| 157 | 1 | 0 | 0.853618   | 10.012369 | -4.123619 |
| 158 | 1 | 0 | 3.416217   | 10.537702 | -5.019147 |
| 159 | 1 | 0 | 4.426164   | 9.084797  | -5.004830 |
| 160 | 1 | 0 | 2.870620   | 9.081992  | -5.847525 |
| 161 | 1 | 0 | 6.708016   | 1.989676  | -2.764411 |
| 162 | 1 | 0 | 5.360432   | 3.990590  | -2.285727 |
| 163 | 1 | 0 | 7.436620   | 4.526594  | 1.429437  |
| 164 | 1 | 0 | 8.000727   | 0.154449  | -1.869766 |
| 165 | 1 | 0 | 11.085376  | -0.389908 | 1.738758  |
| 166 | 1 | 0 | 11.946753  | 1.058739  | 3.524934  |
| 167 | 1 | 0 | 9.297000   | 4.185488  | 2.295186  |
| 168 | 1 | 0 | 11.021425  | 3.174069  | 5.133920  |
| 169 | 1 | 0 | 12.277257  | 3.751417  | 4.041861  |
| 170 | 1 | 0 | 10.727203  | 4.600504  | 4.129842  |
| 171 | 1 | 0 | 6.719106   | -5.408578 | 3.179571  |
| 172 | 1 | 0 | 7.226713   | -5.587013 | -1.077840 |
| 173 | 1 | 0 | 8.104887   | -3.376432 | 3.264810  |
| 174 | 1 | 0 | 8.826297   | -1.383144 | 2.040774  |
| 175 | 1 | 0 | 8.799924   | -5.240747 | -2.469606 |
| 176 | 1 | 0 | 10.373863  | -0.552899 | -2.405602 |
| 177 | 1 | 0 | 10.653307  | -1.915900 | -4.429265 |
| 178 | 1 | 0 | 9.524213   | -5.527681 | -4.705522 |
| 179 | 1 | 0 | 9.370930   | -4.070298 | -5.696500 |
| 180 | 1 | 0 | 10.957276  | -4.576823 | -5.121982 |
| 181 | 1 | 0 | -8.105415  | -3.375963 | -3.264569 |
| 182 | 1 | 0 | -6.719911  | -5.408287 | -3.179353 |
| 183 | 1 | 0 | -7.227223  | -5.586468 | 1.078110  |
| 184 | 1 | 0 | -8.826480  | -1.382525 | -2.040553 |
| 185 | 1 | 0 | -10.373663 | -0.551932 | 2.405891  |
| 186 | 1 | 0 | -10.653145 | -1.914827 | 4.429619  |
| 187 | 1 | 0 | -8.800298  | -5.239972 | 2.469960  |
| 188 | 1 | 0 | -9.524570  | -5.526766 | 4.705900  |
| 189 | 1 | 0 | -9.370828  | -4.069394 | 5.696819  |
| 190 | 1 | 0 | -10.957367 | -4.575583 | 5.122536  |
| 191 | 1 | 0 | -5.359804  | 3.991014  | 2.285613  |
| 192 | 1 | 0 | -7.436142  | 4.527133  | -1.429450 |
| 193 | 1 | 0 | -6.707535  | 1.990220  | 2.764402  |
| 194 | 1 | 0 | -8.000481  | 0.155106  | 1.869875  |
| 195 | 1 | 0 | -9.296577  | 4.186166  | -2.295113 |
| 196 | 1 | 0 | -11.085424 | -0.389014 | -1.738431 |
| 197 | 1 | 0 | -11.946750 | 1.059673  | -3.524600 |
| 198 | 1 | 0 | -10.727160 | 4.601426  | -4.129424 |
| 199 | 1 | 0 | -11.020732 | 3.175051  | -5.133768 |
| 200 | 1 | 0 | -12.277022 | 3.751924  | -4.041986 |

**Table S16.** Cartesian coordinate of *E,R,Z,R,Z,S,E,S* (14)

SCF Done: E(RB3LYP) = -4621.34167166 A.U. after 14 cycles

| Center Number | Atomic Number | Atomic Type | Coordinates (Angstroms) |           |          |
|---------------|---------------|-------------|-------------------------|-----------|----------|
|               |               |             | X                       | Y         | Z        |
| 1             | 6             | 0           | -6.036281               | -9.231163 | 1.327891 |

|    |   |   |           |            |           |
|----|---|---|-----------|------------|-----------|
| 2  | 6 | 0 | -4.900888 | -8.862033  | 0.636559  |
| 3  | 6 | 0 | -4.918905 | -7.793779  | -0.290735 |
| 4  | 6 | 0 | -6.146033 | -7.095167  | -0.502738 |
| 5  | 6 | 0 | -7.287573 | -7.500352  | 0.225430  |
| 6  | 6 | 0 | -7.258294 | -8.549834  | 1.131310  |
| 7  | 6 | 0 | -3.731994 | -7.414916  | -1.034365 |
| 8  | 6 | 0 | -6.187291 | -5.994918  | -1.457506 |
| 9  | 6 | 0 | -5.087503 | -5.846538  | -2.347798 |
| 10 | 6 | 0 | -3.875028 | -6.562286  | -2.097077 |
| 11 | 6 | 0 | -5.146793 | -4.856652  | -3.354903 |
| 12 | 6 | 0 | -6.169383 | -3.934834  | -3.378819 |
| 13 | 6 | 0 | -7.172996 | -3.945908  | -2.376277 |
| 14 | 6 | 0 | -7.205079 | -5.014844  | -1.482340 |
| 15 | 6 | 0 | -8.495996 | -8.974623  | 1.883807  |
| 16 | 1 | 0 | -4.325644 | -4.778325  | -4.062510 |
| 17 | 1 | 0 | -6.146373 | -3.122263  | -4.097798 |
| 18 | 1 | 0 | -7.988315 | -5.040722  | -0.731753 |
| 19 | 1 | 0 | -3.002395 | -6.298910  | -2.687775 |
| 20 | 1 | 0 | -3.971273 | -9.400497  | 0.791725  |
| 21 | 1 | 0 | -5.995057 | -10.063764 | 2.025763  |
| 22 | 1 | 0 | -8.232242 | -6.995981  | 0.046175  |
| 23 | 1 | 0 | -8.750805 | -10.019944 | 1.673753  |
| 24 | 1 | 0 | -9.359285 | -8.359656  | 1.615940  |
| 25 | 1 | 0 | -8.349839 | -8.893732  | 2.967419  |
| 26 | 6 | 0 | -2.022458 | -6.330740  | 2.833180  |
| 27 | 6 | 0 | -2.567775 | -6.733908  | 1.632289  |
| 28 | 6 | 0 | -1.775437 | -7.322833  | 0.614977  |
| 29 | 6 | 0 | -0.369900 | -7.415109  | 0.839702  |
| 30 | 6 | 0 | 0.149882  | -7.016220  | 2.093101  |
| 31 | 6 | 0 | -0.644947 | -6.488238  | 3.096348  |
| 32 | 6 | 0 | -2.336444 | -7.789607  | -0.647316 |
| 33 | 6 | 0 | 0.500814  | -7.854955  | -0.239538 |
| 34 | 6 | 0 | -0.084218 | -8.408856  | -1.410548 |
| 35 | 6 | 0 | -1.508054 | -8.382056  | -1.565215 |
| 36 | 6 | 0 | 0.767171  | -8.832235  | -2.460789 |
| 37 | 6 | 0 | 2.124772  | -8.587457  | -2.424371 |
| 38 | 6 | 0 | 2.705323  | -7.911402  | -1.321341 |
| 39 | 6 | 0 | 1.890174  | -7.615067  | -0.232101 |
| 40 | 6 | 0 | -0.068246 | -6.082162  | 4.430352  |
| 41 | 1 | 0 | 2.748807  | -8.878592  | -3.264219 |
| 42 | 1 | 0 | 2.320491  | -7.053534  | 0.588060  |
| 43 | 1 | 0 | 0.324521  | -9.303579  | -3.334615 |
| 44 | 1 | 0 | -1.927852 | -8.749245  | -2.498102 |
| 45 | 1 | 0 | 1.210470  | -7.139154  | 2.286653  |
| 46 | 1 | 0 | -3.628733 | -6.601316  | 1.468907  |
| 47 | 1 | 0 | -2.665701 | -5.890745  | 3.591281  |
| 48 | 1 | 0 | 1.013856  | -6.234620  | 4.462807  |
| 49 | 1 | 0 | -0.513104 | -6.659905  | 5.249209  |
| 50 | 1 | 0 | -0.264728 | -5.024748  | 4.642421  |
| 51 | 6 | 0 | 2.536353  | 10.016450  | -3.325494 |
| 52 | 6 | 0 | 2.918482  | 9.427920   | -2.136948 |
| 53 | 6 | 0 | 1.967012  | 8.884293   | -1.241772 |
| 54 | 6 | 0 | 0.586317  | 8.963717   | -1.593793 |
| 55 | 6 | 0 | 0.232244  | 9.571022   | -2.819614 |
| 56 | 6 | 0 | 1.174824  | 10.095025  | -3.690829 |
| 57 | 6 | 0 | 2.359600  | 8.284091   | 0.024171  |
| 58 | 6 | 0 | -0.414973 | 8.419479   | -0.687035 |
| 59 | 6 | 0 | -0.010163 | 8.097807   | 0.638357  |
| 60 | 6 | 0 | 1.382469  | 8.034888   | 0.955886  |

|     |   |   |           |           |           |
|-----|---|---|-----------|-----------|-----------|
| 61  | 6 | 0 | -0.985043 | 7.655365  | 1.563414  |
| 62  | 6 | 0 | -2.272309 | 7.376717  | 1.157639  |
| 63  | 6 | 0 | -2.642932 | 7.514312  | -0.204089 |
| 64  | 6 | 0 | -1.730834 | 8.097216  | -1.082246 |
| 65  | 6 | 0 | 0.769699  | 10.751177 | -4.988308 |
| 66  | 1 | 0 | -0.681626 | 7.451656  | 2.586979  |
| 67  | 1 | 0 | -2.977989 | 6.941532  | 1.858324  |
| 68  | 1 | 0 | -2.018965 | 8.223283  | -2.120730 |
| 69  | 1 | 0 | 1.655382  | 7.612437  | 1.917933  |
| 70  | 1 | 0 | 3.968437  | 9.392558  | -1.867078 |
| 71  | 1 | 0 | 3.292163  | 10.438107 | -3.983524 |
| 72  | 1 | 0 | -0.818598 | 9.662736  | -3.076511 |
| 73  | 1 | 0 | 1.211644  | 10.235279 | -5.848865 |
| 74  | 1 | 0 | 1.109658  | 11.792472 | -5.031539 |
| 75  | 1 | 0 | -0.315808 | 10.747755 | -5.117925 |
| 76  | 6 | 0 | 4.759640  | 8.784260  | 3.701755  |
| 77  | 6 | 0 | 4.089350  | 8.727055  | 2.496911  |
| 78  | 6 | 0 | 4.403095  | 7.751219  | 1.521208  |
| 79  | 6 | 0 | 5.448433  | 6.819994  | 1.806411  |
| 80  | 6 | 0 | 6.111509  | 6.909722  | 3.051370  |
| 81  | 6 | 0 | 5.788464  | 7.865346  | 4.002242  |
| 82  | 6 | 0 | 3.716273  | 7.702717  | 0.240594  |
| 83  | 6 | 0 | 5.803731  | 5.811089  | 0.816134  |
| 84  | 6 | 0 | 5.271604  | 5.950703  | -0.495785 |
| 85  | 6 | 0 | 4.233976  | 6.899241  | -0.744573 |
| 86  | 6 | 0 | 5.658098  | 5.029058  | -1.496584 |
| 87  | 6 | 0 | 6.428276  | 3.930387  | -1.188882 |
| 88  | 6 | 0 | 6.847949  | 3.692014  | 0.144988  |
| 89  | 6 | 0 | 6.575518  | 4.664667  | 1.106621  |
| 90  | 6 | 0 | 6.519809  | 7.943877  | 5.320289  |
| 91  | 1 | 0 | 6.634542  | 3.187547  | -1.952454 |
| 92  | 1 | 0 | 6.914206  | 4.495949  | 2.123178  |
| 93  | 1 | 0 | 5.271943  | 5.158320  | -2.504212 |
| 94  | 1 | 0 | 3.749232  | 6.863474  | -1.715048 |
| 95  | 1 | 0 | 6.927349  | 6.225908  | 3.263683  |
| 96  | 1 | 0 | 3.315137  | 9.453866  | 2.276253  |
| 97  | 1 | 0 | 4.503367  | 9.555377  | 4.424039  |
| 98  | 1 | 0 | 7.311668  | 7.192985  | 5.385358  |
| 99  | 1 | 0 | 5.837078  | 7.784183  | 6.163277  |
| 100 | 1 | 0 | 6.978487  | 8.929080  | 5.463601  |
| 101 | 6 | 0 | 10.637560 | -2.197000 | -2.900838 |
| 102 | 6 | 0 | 9.829523  | -2.789866 | -1.952510 |
| 103 | 6 | 0 | 9.071270  | -2.018304 | -1.039828 |
| 104 | 6 | 0 | 9.163673  | -0.595063 | -1.116173 |
| 105 | 6 | 0 | 10.002185 | -0.024420 | -2.100585 |
| 106 | 6 | 0 | 10.736155 | -0.791438 | -2.991899 |
| 107 | 6 | 0 | 8.242068  | -2.638630 | -0.019980 |
| 108 | 6 | 0 | 8.397452  | 0.225276  | -0.186936 |
| 109 | 6 | 0 | 7.784391  | -0.418995 | 0.923775  |
| 110 | 6 | 0 | 7.725755  | -1.845292 | 0.973530  |
| 111 | 6 | 0 | 7.094136  | 0.365442  | 1.877416  |
| 112 | 6 | 0 | 6.893050  | 1.712817  | 1.676452  |
| 113 | 6 | 0 | 7.370152  | 2.347309  | 0.501017  |
| 114 | 6 | 0 | 8.160521  | 1.604357  | -0.375135 |
| 115 | 6 | 0 | 11.634878 | -0.155229 | -4.024226 |
| 116 | 1 | 0 | 6.653487  | -0.127640 | 2.739897  |
| 117 | 1 | 0 | 6.280487  | 2.275088  | 2.373772  |
| 118 | 1 | 0 | 8.546087  | 2.092552  | -1.263620 |
| 119 | 1 | 0 | 7.121725  | -2.294140 | 1.756162  |

|     |   |   |           |           |           |
|-----|---|---|-----------|-----------|-----------|
| 120 | 1 | 0 | 9.781627  | -3.871343 | -1.886317 |
| 121 | 1 | 0 | 11.217270 | -2.819284 | -3.578139 |
| 122 | 1 | 0 | 10.103098 | 1.055412  | -2.144640 |
| 123 | 1 | 0 | 11.339567 | -0.443494 | -5.039914 |
| 124 | 1 | 0 | 12.676775 | -0.470248 | -3.893556 |
| 125 | 1 | 0 | 11.605294 | 0.935949  | -3.964206 |
| 126 | 6 | 0 | 8.345709  | -5.583075 | 3.259738  |
| 127 | 6 | 0 | 8.419354  | -4.721321 | 2.184673  |
| 128 | 6 | 0 | 7.646549  | -4.927749 | 1.016992  |
| 129 | 6 | 0 | 6.780717  | -6.062298 | 0.970498  |
| 130 | 6 | 0 | 6.732101  | -6.922522 | 2.090899  |
| 131 | 6 | 0 | 7.491328  | -6.706879 | 3.230464  |
| 132 | 6 | 0 | 7.743848  | -4.040959 | -0.130537 |
| 133 | 6 | 0 | 5.974466  | -6.300751 | -0.219453 |
| 134 | 6 | 0 | 6.273406  | -5.549617 | -1.390364 |
| 135 | 6 | 0 | 7.159408  | -4.431794 | -1.309026 |
| 136 | 6 | 0 | 5.553470  | -5.816397 | -2.578622 |
| 137 | 6 | 0 | 4.480274  | -6.679813 | -2.579353 |
| 138 | 6 | 0 | 4.064777  | -7.314952 | -1.381255 |
| 139 | 6 | 0 | 4.859379  | -7.165985 | -0.245532 |
| 140 | 6 | 0 | 7.429951  | -7.648699 | 4.408319  |
| 141 | 1 | 0 | 3.884826  | -6.797541 | -3.479085 |
| 142 | 1 | 0 | 4.559390  | -7.674678 | 0.664277  |
| 143 | 1 | 0 | 5.810010  | -5.266702 | -3.480441 |
| 144 | 1 | 0 | 7.241302  | -3.793444 | -2.183497 |
| 145 | 1 | 0 | 6.101249  | -7.804804 | 2.049448  |
| 146 | 1 | 0 | 9.095735  | -3.874199 | 2.219486  |
| 147 | 1 | 0 | 8.963936  | -5.403694 | 4.135915  |
| 148 | 1 | 0 | 6.744216  | -8.479787 | 4.222977  |
| 149 | 1 | 0 | 7.091876  | -7.130951 | 5.313763  |
| 150 | 1 | 0 | 8.416331  | -8.071205 | 4.632371  |
| 151 | 6 | 0 | -7.655006 | 1.015786  | 3.125158  |
| 152 | 6 | 0 | -7.749099 | 1.802325  | 1.995689  |
| 153 | 6 | 0 | -8.058890 | 1.250273  | 0.727758  |
| 154 | 6 | 0 | -8.188864 | -0.168209 | 0.638629  |
| 155 | 6 | 0 | -8.108739 | -0.940353 | 1.820120  |
| 156 | 6 | 0 | -7.858819 | -0.379214 | 3.061177  |
| 157 | 6 | 0 | -8.203984 | 2.062415  | -0.474929 |
| 158 | 6 | 0 | -8.325030 | -0.792875 | -0.667681 |
| 159 | 6 | 0 | -8.617818 | 0.027714  | -1.789843 |
| 160 | 6 | 0 | -8.580876 | 1.451941  | -1.644491 |
| 161 | 6 | 0 | -8.740876 | -0.580122 | -3.064022 |
| 162 | 6 | 0 | -8.407893 | -1.905324 | -3.255545 |
| 163 | 6 | 0 | -7.952745 | -2.696620 | -2.170366 |
| 164 | 6 | 0 | -7.997529 | -2.146635 | -0.891971 |
| 165 | 6 | 0 | -7.797229 | -1.220967 | 4.312064  |
| 166 | 1 | 0 | -9.025301 | 0.036287  | -3.913013 |
| 167 | 1 | 0 | -8.439719 | -2.332542 | -4.253670 |
| 168 | 1 | 0 | -7.607375 | -2.734478 | -0.069527 |
| 169 | 1 | 0 | -8.717572 | 2.057864  | -2.536292 |
| 170 | 1 | 0 | -7.591294 | 2.868364  | 2.086264  |
| 171 | 1 | 0 | -7.426948 | 1.480109  | 4.081472  |
| 172 | 1 | 0 | -8.264919 | -2.012680 | 1.757756  |
| 173 | 1 | 0 | -8.575869 | -0.929471 | 5.026929  |
| 174 | 1 | 0 | -6.834707 | -1.102974 | 4.823181  |
| 175 | 1 | 0 | -7.930010 | -2.282761 | 4.087971  |
| 176 | 6 | 0 | -9.791773 | 5.545968  | 1.807866  |
| 177 | 6 | 0 | -9.362825 | 4.499970  | 1.017249  |
| 178 | 6 | 0 | -8.129690 | 4.556406  | 0.326036  |

|     |   |   |            |          |           |
|-----|---|---|------------|----------|-----------|
| 179 | 6 | 0 | -7.329308  | 5.733549 | 0.453195  |
| 180 | 6 | 0 | -7.800625  | 6.782283 | 1.275348  |
| 181 | 6 | 0 | -9.008880  | 6.713080 | 1.952199  |
| 182 | 6 | 0 | -7.684805  | 3.465664 | -0.520908 |
| 183 | 6 | 0 | -6.068281  | 5.828421 | -0.272537 |
| 184 | 6 | 0 | -5.813895  | 4.861683 | -1.284500 |
| 185 | 6 | 0 | -6.629313  | 3.691496 | -1.365268 |
| 186 | 6 | 0 | -4.656824  | 4.986912 | -2.085470 |
| 187 | 6 | 0 | -3.705419  | 5.940682 | -1.804977 |
| 188 | 6 | 0 | -3.855585  | 6.803149 | -0.688666 |
| 189 | 6 | 0 | -5.055628  | 6.770713 | 0.020199  |
| 190 | 6 | 0 | -9.495372  | 7.854108 | 2.812396  |
| 191 | 1 | 0 | -2.780751  | 5.965210 | -2.372123 |
| 192 | 1 | 0 | -5.180197  | 7.443397 | 0.862638  |
| 193 | 1 | 0 | -4.489502  | 4.266686 | -2.881912 |
| 194 | 1 | 0 | -6.304446  | 2.898378 | -2.031951 |
| 195 | 1 | 0 | -7.213759  | 7.692156 | 1.355669  |
| 196 | 1 | 0 | -9.979045  | 3.613024 | 0.908247  |
| 197 | 1 | 0 | -10.748923 | 5.477928 | 2.318858  |
| 198 | 1 | 0 | -10.467986 | 8.225442 | 2.469235  |
| 199 | 1 | 0 | -8.794028  | 8.692591 | 2.800945  |
| 200 | 1 | 0 | -9.623923  | 7.539283 | 3.854775  |

**Table S17.** Cartesian coordinate of Z,R,E,S,Z,R,Z,S (15)

SCF Done: E(RB3LYP) = -4621.34096695 A.U. after 5 cycles

| Center<br>Number | Atomic<br>Number | Atomic<br>Type | Coordinates (Angstroms) |            |           |
|------------------|------------------|----------------|-------------------------|------------|-----------|
|                  |                  |                | X                       | Y          | Z         |
| 1                | 6                | 0              | -1.628210               | -10.273432 | 1.906296  |
| 2                | 6                | 0              | -0.692913               | -9.626152  | 1.126030  |
| 3                | 6                | 0              | -1.073683               | -8.654732  | 0.169447  |
| 4                | 6                | 0              | -2.461878               | -8.345703  | 0.028443  |
| 5                | 6                | 0              | -3.389776               | -9.033855  | 0.843162  |
| 6                | 6                | 0              | -3.004624               | -9.986004  | 1.774019  |
| 7                | 6                | 0              | -0.094017               | -8.003809  | -0.680100 |
| 8                | 6                | 0              | -2.876684               | -7.326786  | -0.928386 |
| 9                | 6                | 0              | -1.907163               | -6.845509  | -1.852684 |
| 10               | 6                | 0              | -0.536186               | -7.216662  | -1.711012 |
| 11               | 6                | 0              | -2.290009               | -5.872092  | -2.803026 |
| 12               | 6                | 0              | -3.541366               | -5.302435  | -2.770230 |
| 13               | 6                | 0              | -4.494538               | -5.687097  | -1.790446 |
| 14               | 6                | 0              | -4.158473               | -6.732884  | -0.930135 |
| 15               | 6                | 0              | -4.019196               | -10.711896 | 2.623714  |
| 16               | 6                | 0              | 3.110378                | -9.264303  | -3.426215 |
| 17               | 6                | 0              | 2.117776                | -8.959721  | -2.518093 |
| 18               | 6                | 0              | 2.398395                | -8.244522  | -1.329323 |
| 19               | 6                | 0              | 3.744047                | -7.828501  | -1.086677 |
| 20               | 6                | 0              | 4.733384                | -8.163645  | -2.039017 |
| 21               | 6                | 0              | 4.446917                | -8.869849  | -3.196894 |
| 22               | 6                | 0              | 1.363050                | -7.963623  | -0.352394 |
| 23               | 6                | 0              | 4.052570                | -7.062483  | 0.115033  |
| 24               | 6                | 0              | 3.048436                | -6.964932  | 1.118898  |
| 25               | 6                | 0              | 1.727649                | -7.439735  | 0.860170  |
| 26               | 6                | 0              | 3.330190                | -6.245082  | 2.301715  |
| 27               | 6                | 0              | 4.503432                | -5.541472  | 2.440988  |
| 28               | 6                | 0              | 5.478025                | -5.530103  | 1.407946  |
| 29               | 6                | 0              | 5.254526                | -6.342245  | 0.295176  |



|    |   |   |           |           |           |
|----|---|---|-----------|-----------|-----------|
| 30 | 6 | 0 | 5.526765  | -9.225084 | -4.189926 |
| 31 | 6 | 0 | -1.962135 | 6.650716  | -3.459807 |
| 32 | 6 | 0 | -1.378108 | 7.177449  | -2.326722 |
| 33 | 6 | 0 | -2.106438 | 7.344824  | -1.122213 |
| 34 | 6 | 0 | -3.451141 | 6.868311  | -1.091235 |
| 35 | 6 | 0 | -4.025097 | 6.359066  | -2.279070 |
| 36 | 6 | 0 | -3.316015 | 6.252478  | -3.463475 |
| 37 | 6 | 0 | -1.524115 | 7.937057  | 0.076609  |
| 38 | 6 | 0 | -4.175096 | 6.848999  | 0.170246  |
| 39 | 6 | 0 | -3.627268 | 7.539734  | 1.284813  |
| 40 | 6 | 0 | -2.312837 | 8.099745  | 1.186817  |
| 41 | 6 | 0 | -4.325412 | 7.506207  | 2.517306  |
| 42 | 6 | 0 | -5.428334 | 6.695418  | 2.690952  |
| 43 | 6 | 0 | -5.902432 | 5.888541  | 1.625842  |
| 44 | 6 | 0 | -5.308746 | 6.035291  | 0.375211  |
| 45 | 6 | 0 | -3.955342 | 5.722476  | -4.723421 |
| 46 | 6 | 0 | 0.921426  | 10.758216 | -2.331740 |
| 47 | 6 | 0 | 0.159475  | 9.961184  | -1.502570 |
| 48 | 6 | 0 | 0.750755  | 8.959841  | -0.697040 |
| 49 | 6 | 0 | 2.167491  | 8.788889  | -0.751967 |
| 50 | 6 | 0 | 2.914318  | 9.621283  | -1.616377 |
| 51 | 6 | 0 | 2.323300  | 10.598053 | -2.403362 |
| 52 | 6 | 0 | -0.044996 | 8.130939  | 0.189353  |
| 53 | 6 | 0 | 2.800801  | 7.779288  | 0.086937  |
| 54 | 6 | 0 | 2.023976  | 7.199988  | 1.128476  |
| 55 | 6 | 0 | 0.605842  | 7.382227  | 1.134654  |
| 56 | 6 | 0 | 2.641293  | 6.308847  | 2.035145  |
| 57 | 6 | 0 | 3.932290  | 5.875749  | 1.830055  |
| 58 | 6 | 0 | 4.658135  | 6.294527  | 0.685977  |
| 59 | 6 | 0 | 4.106330  | 7.282331  | -0.127726 |
| 60 | 6 | 0 | 3.145593  | 11.486998 | -3.304578 |
| 61 | 6 | 0 | 10.644892 | 2.483432  | 3.568249  |
| 62 | 6 | 0 | 10.232615 | 1.715742  | 2.497275  |
| 63 | 6 | 0 | 9.234313  | 2.168105  | 1.603045  |
| 64 | 6 | 0 | 8.669137  | 3.461049  | 1.821868  |
| 65 | 6 | 0 | 9.110547  | 4.215826  | 2.931703  |
| 66 | 6 | 0 | 10.079533 | 3.753945  | 3.809471  |
| 67 | 6 | 0 | 8.802134  | 1.370184  | 0.463153  |
| 68 | 6 | 0 | 7.671111  | 3.975373  | 0.893480  |
| 69 | 6 | 0 | 7.513750  | 3.299859  | -0.347983 |
| 70 | 6 | 0 | 8.074465  | 1.996800  | -0.519092 |
| 71 | 6 | 0 | 6.642361  | 3.843354  | -1.320266 |
| 72 | 6 | 0 | 5.830466  | 4.915072  | -1.020884 |
| 73 | 6 | 0 | 5.833574  | 5.478095  | 0.280541  |
| 74 | 6 | 0 | 6.795294  | 5.042399  | 1.190692  |
| 75 | 6 | 0 | 10.541559 | 4.585096  | 4.981625  |
| 76 | 6 | 0 | 9.719799  | -1.063334 | -3.115130 |
| 77 | 6 | 0 | 9.604589  | -0.333589 | -1.948845 |
| 78 | 6 | 0 | 8.997995  | -0.877202 | -0.792142 |
| 79 | 6 | 0 | 8.521578  | -2.221376 | -0.850309 |
| 80 | 6 | 0 | 8.649807  | -2.935715 | -2.062483 |
| 81 | 6 | 0 | 9.231494  | -2.385223 | -3.194221 |
| 82 | 6 | 0 | 8.880643  | -0.118214 | 0.446164  |
| 83 | 6 | 0 | 7.943527  | -2.830119 | 0.340198  |
| 84 | 6 | 0 | 8.134437  | -2.165245 | 1.581644  |
| 85 | 6 | 0 | 8.582236  | -0.808710 | 1.596415  |
| 86 | 6 | 0 | 7.702244  | -2.805899 | 2.766696  |
| 87 | 6 | 0 | 6.966717  | -3.968460 | 2.717201  |
| 88 | 6 | 0 | 6.580079  | -4.534008 | 1.472990  |

|     |   |   |            |            |           |
|-----|---|---|------------|------------|-----------|
| 89  | 6 | 0 | 7.133396   | -3.984838  | 0.314656  |
| 90  | 6 | 0 | 9.365261   | -3.173271  | -4.474522 |
| 91  | 6 | 0 | -9.150200  | -3.084027  | 3.676566  |
| 92  | 6 | 0 | -9.205671  | -2.098763  | 2.711492  |
| 93  | 6 | 0 | -8.575762  | -2.257398  | 1.454377  |
| 94  | 6 | 0 | -7.888900  | -3.481241  | 1.194001  |
| 95  | 6 | 0 | -7.848056  | -4.464918  | 2.207678  |
| 96  | 6 | 0 | -8.457309  | -4.291051  | 3.440732  |
| 97  | 6 | 0 | -8.642546  | -1.228873  | 0.425725  |
| 98  | 6 | 0 | -7.272548  | -3.695698  | -0.108367 |
| 99  | 6 | 0 | -7.606047  | -2.795716  | -1.156983 |
| 100 | 6 | 0 | -8.272945  | -1.569372  | -0.852833 |
| 101 | 6 | 0 | -7.117317  | -3.058673  | -2.458457 |
| 102 | 6 | 0 | -6.215236  | -4.073144  | -2.687201 |
| 103 | 6 | 0 | -5.717250  | -4.860232  | -1.615305 |
| 104 | 6 | 0 | -6.302884  | -4.689455  | -0.359926 |
| 105 | 6 | 0 | -8.406616  | -5.362122  | 4.502938  |
| 106 | 6 | 0 | -11.124076 | 1.574447   | -1.933577 |
| 107 | 6 | 0 | -10.470196 | 0.690819   | -1.098701 |
| 108 | 6 | 0 | -9.525624  | 1.135348   | -0.143419 |
| 109 | 6 | 0 | -9.271448  | 2.537666   | -0.048282 |
| 110 | 6 | 0 | -9.957072  | 3.411580   | -0.921829 |
| 111 | 6 | 0 | -10.871245 | 2.961350   | -1.861852 |
| 112 | 6 | 0 | -8.845821  | 0.211546   | 0.753044  |
| 113 | 6 | 0 | -8.327085  | 3.031781   | 0.945082  |
| 114 | 6 | 0 | -7.904567  | 2.132223   | 1.962551  |
| 115 | 6 | 0 | -8.169384  | 0.735258   | 1.827308  |
| 116 | 6 | 0 | -7.071469  | 2.610769   | 3.000573  |
| 117 | 6 | 0 | -6.543884  | 3.881912   | 2.954613  |
| 118 | 6 | 0 | -6.807900  | 4.731495   | 1.850040  |
| 119 | 6 | 0 | -7.744388  | 4.317474   | 0.904135  |
| 120 | 6 | 0 | -11.598001 | 3.918216   | -2.775352 |
| 121 | 1 | 0 | -1.551616  | -5.521211  | -3.519057 |
| 122 | 1 | 0 | -3.767833  | -4.490349  | -3.451461 |
| 123 | 1 | 0 | -4.888433  | -7.054191  | -0.196035 |
| 124 | 1 | 0 | 0.186895   | -6.736410  | -2.364042 |
| 125 | 1 | 0 | 0.358913   | -9.870591  | 1.228941  |
| 126 | 1 | 0 | -1.304768  | -11.024063 | 2.623205  |
| 127 | 1 | 0 | -4.449444  | -8.832222  | 0.722521  |
| 128 | 1 | 0 | -3.854552  | -10.519209 | 3.690498  |
| 129 | 1 | 0 | -5.039787  | -10.403335 | 2.381918  |
| 130 | 1 | 0 | -3.954249  | -11.796928 | 2.482115  |
| 131 | 1 | 0 | 4.640798   | -4.920208  | 3.318200  |
| 132 | 1 | 0 | 6.002661   | -6.365122  | -0.488934 |
| 133 | 1 | 0 | 2.568377   | -6.189674  | 3.074763  |
| 134 | 1 | 0 | 0.964677   | -7.240069  | 1.607092  |
| 135 | 1 | 0 | 5.764596   | -7.882879  | -1.849526 |
| 136 | 1 | 0 | 1.099145   | -9.284362  | -2.701768 |
| 137 | 1 | 0 | 2.864923   | -9.826606  | -4.323755 |
| 138 | 1 | 0 | 5.319741   | -8.790080  | -5.174832 |
| 139 | 1 | 0 | 6.506146   | -8.864630  | -3.864107 |
| 140 | 1 | 0 | 5.598267   | -10.310053 | -4.329405 |
| 141 | 1 | 0 | -3.935302  | 8.078640   | 3.355040  |
| 142 | 1 | 0 | -5.910466  | 6.637770   | 3.662536  |
| 143 | 1 | 0 | -5.639224  | 5.383310   | -0.424465 |
| 144 | 1 | 0 | -1.888100  | 8.561997   | 2.074041  |
| 145 | 1 | 0 | -0.339206  | 7.475288   | -2.364791 |
| 146 | 1 | 0 | -1.371151  | 6.547243   | -4.366527 |
| 147 | 1 | 0 | -5.065710  | 6.051359   | -2.270193 |

|     |   |   |            |           |           |
|-----|---|---|------------|-----------|-----------|
| 148 | 1 | 0 | -3.978432  | 6.486374  | -5.509804 |
| 149 | 1 | 0 | -3.395642  | 4.869387  | -5.123815 |
| 150 | 1 | 0 | -4.983211  | 5.395564  | -4.545062 |
| 151 | 1 | 0 | 4.361270   | 5.120709  | 2.481048  |
| 152 | 1 | 0 | 4.669369   | 7.618482  | -0.992559 |
| 153 | 1 | 0 | 2.054100   | 5.904177  | 2.855262  |
| 154 | 1 | 0 | 0.025082   | 6.785057  | 1.831441  |
| 155 | 1 | 0 | 3.994926   | 9.519199  | -1.641156 |
| 156 | 1 | 0 | -0.915672  | 10.101410 | -1.452406 |
| 157 | 1 | 0 | 0.439963   | 11.526868 | -2.931174 |
| 158 | 1 | 0 | 4.209241   | 11.240457 | -3.249592 |
| 159 | 1 | 0 | 2.832478   | 11.390734 | -4.350824 |
| 160 | 1 | 0 | 3.031743   | 12.543163 | -3.033636 |
| 161 | 1 | 0 | 6.558919   | 3.349304  | -2.284670 |
| 162 | 1 | 0 | 5.099339   | 5.260284  | -1.745075 |
| 163 | 1 | 0 | 6.811613   | 5.485141  | 2.181428  |
| 164 | 1 | 0 | 7.758829   | 1.437236  | -1.393136 |
| 165 | 1 | 0 | 10.694941  | 0.750920  | 2.318832  |
| 166 | 1 | 0 | 11.426032  | 2.111292  | 4.226584  |
| 167 | 1 | 0 | 8.704733   | 5.211194  | 3.084778  |
| 168 | 1 | 0 | 10.326930  | 4.083723  | 5.932859  |
| 169 | 1 | 0 | 11.623791  | 4.755394  | 4.947784  |
| 170 | 1 | 0 | 10.048915  | 5.560849  | 5.000343  |
| 171 | 1 | 0 | 6.637965   | -4.426689 | 3.643676  |
| 172 | 1 | 0 | 6.837392   | -4.385881 | -0.647849 |
| 173 | 1 | 0 | 7.915684   | -2.337757 | 3.724104  |
| 174 | 1 | 0 | 8.515186   | -0.277383 | 2.539958  |
| 175 | 1 | 0 | 8.314735   | -3.967626 | -2.101058 |
| 176 | 1 | 0 | 10.004142  | 0.673791  | -1.904698 |
| 177 | 1 | 0 | 10.205927  | -0.619691 | -3.980525 |
| 178 | 1 | 0 | 8.983255   | -4.191278 | -4.360674 |
| 179 | 1 | 0 | 8.811250   | -2.697969 | -5.292677 |
| 180 | 1 | 0 | 10.411541  | -3.240487 | -4.794316 |
| 181 | 1 | 0 | -7.428765  | -2.413213 | -3.275569 |
| 182 | 1 | 0 | -5.848831  | -4.240815 | -3.694351 |
| 183 | 1 | 0 | -5.918937  | -5.262066 | 0.476479  |
| 184 | 1 | 0 | -8.337165  | -0.829917 | -1.644508 |
| 185 | 1 | 0 | -9.759385  | -1.186812 | 2.906331  |
| 186 | 1 | 0 | -9.658703  | -2.935422 | 4.625973  |
| 187 | 1 | 0 | -7.352408  | -5.408906 | 2.003770  |
| 188 | 1 | 0 | -7.896094  | -5.003051 | 5.404405  |
| 189 | 1 | 0 | -9.413567  | -5.669873 | 4.807572  |
| 190 | 1 | 0 | -7.876091  | -6.250950 | 4.151161  |
| 191 | 1 | 0 | -5.833269  | 4.199382  | 3.711077  |
| 192 | 1 | 0 | -7.966028  | 4.978019  | 0.072428  |
| 193 | 1 | 0 | -6.786274  | 1.930746  | 3.798930  |
| 194 | 1 | 0 | -7.673644  | 0.068336  | 2.525033  |
| 195 | 1 | 0 | -9.790448  | 4.480627  | -0.832682 |
| 196 | 1 | 0 | -10.694989 | -0.368668 | -1.156687 |
| 197 | 1 | 0 | -11.854841 | 1.199683  | -2.646036 |
| 198 | 1 | 0 | -11.322648 | 4.956062  | -2.569862 |
| 199 | 1 | 0 | -11.369534 | 3.713361  | -3.828022 |
| 200 | 1 | 0 | -12.684706 | 3.830196  | -2.661992 |

**Table S18.** Cartesian coordinate of Z,R,Z,R,Z,S,Z,S (16)

SCF Done: E(RB3LYP) = -4621.33795807 A.U. after 5 cycles

| Center | Atomic | Atomic | Coordinates (Angstroms) |
|--------|--------|--------|-------------------------|
|--------|--------|--------|-------------------------|

| Number | Number | Type | X         | Y         | Z         |
|--------|--------|------|-----------|-----------|-----------|
| 1      | 6      | 0    | 1.313510  | 10.419234 | -0.876637 |
| 2      | 6      | 0    | 0.389355  | 9.551500  | -0.333501 |
| 3      | 6      | 0    | 0.790854  | 8.409859  | 0.399858  |
| 4      | 6      | 0    | 2.189983  | 8.166759  | 0.577985  |
| 5      | 6      | 0    | 3.104330  | 9.081688  | 0.007118  |
| 6      | 6      | 0    | 2.698608  | 10.195082 | -0.712471 |
| 7      | 6      | 0    | -0.184338 | 7.515666  | 0.990205  |
| 8      | 6      | 0    | 2.631754  | 7.002463  | 1.339699  |
| 9      | 6      | 0    | 1.642146  | 6.255449  | 2.037589  |
| 10     | 6      | 0    | 0.258202  | 6.537031  | 1.838601  |
| 11     | 6      | 0    | 2.032642  | 5.156824  | 2.833153  |
| 12     | 6      | 0    | 3.341452  | 4.741285  | 2.867830  |
| 13     | 6      | 0    | 4.336511  | 5.403217  | 2.101441  |
| 14     | 6      | 0    | 3.970071  | 6.543528  | 1.386190  |
| 15     | 6      | 0    | 3.700054  | 11.159073 | -1.301047 |
| 16     | 1      | 0    | 1.269068  | 4.603624  | 3.373371  |
| 17     | 1      | 0    | 3.601695  | 3.846721  | 3.422133  |
| 18     | 1      | 0    | 4.733439  | 7.063799  | 0.817572  |
| 19     | 1      | 0    | -0.463490 | 5.874098  | 2.306312  |
| 20     | 1      | 0    | -0.672383 | 9.741841  | -0.455612 |
| 21     | 1      | 0    | 0.974242  | 11.292080 | -1.428856 |
| 22     | 1      | 0    | 4.168208  | 8.926422  | 0.155651  |
| 23     | 1      | 0    | 3.553468  | 12.173104 | -0.911240 |
| 24     | 1      | 0    | 4.726746  | 10.859040 | -1.074958 |
| 25     | 1      | 0    | 3.600628  | 11.219200 | -2.391294 |
| 26     | 6      | 0    | -1.830296 | 6.620035  | -2.973127 |
| 27     | 6      | 0    | -1.330011 | 7.004713  | -1.746487 |
| 28     | 6      | 0    | -2.156474 | 7.075719  | -0.598333 |
| 29     | 6      | 0    | -3.518574 | 6.669640  | -0.728924 |
| 30     | 6      | 0    | -4.000049 | 6.298283  | -2.005178 |
| 31     | 6      | 0    | -3.190334 | 6.275053  | -3.128923 |
| 32     | 6      | 0    | -1.653955 | 7.503215  | 0.699046  |
| 33     | 6      | 0    | -4.357010 | 6.586138  | 0.457896  |
| 34     | 6      | 0    | -3.887512 | 7.172396  | 1.664597  |
| 35     | 6      | 0    | -2.535879 | 7.639584  | 1.739315  |
| 36     | 6      | 0    | -4.702155 | 7.101018  | 2.820950  |
| 37     | 6      | 0    | -5.845987 | 6.331100  | 2.837839  |
| 38     | 6      | 0    | -6.239656 | 5.601469  | 1.687164  |
| 39     | 6      | 0    | -5.532096 | 5.805000  | 0.504760  |
| 40     | 6      | 0    | -3.730801 | 5.889951  | -4.484290 |
| 41     | 1      | 0    | -6.421410 | 6.235993  | 3.754034  |
| 42     | 1      | 0    | -5.807568 | 5.217597  | -0.363550 |
| 43     | 1      | 0    | -4.371087 | 7.602850  | 3.726569  |
| 44     | 1      | 0    | -2.168523 | 7.980753  | 2.703537  |
| 45     | 1      | 0    | -5.047889 | 6.037485  | -2.115930 |
| 46     | 1      | 0    | -0.283413 | 7.268922  | -1.662053 |
| 47     | 1      | 0    | -1.168154 | 6.588154  | -3.834912 |
| 48     | 1      | 0    | -4.790426 | 5.625562  | -4.433545 |
| 49     | 1      | 0    | -3.624031 | 6.710457  | -5.203689 |
| 50     | 1      | 0    | -3.189839 | 5.030816  | -4.897766 |
| 51     | 6      | 0    | 1.831775  | -6.621911 | 2.973895  |
| 52     | 6      | 0    | 1.331071  | -7.006222 | 1.747313  |
| 53     | 6      | 0    | 2.157095  | -7.076752 | 0.598827  |
| 54     | 6      | 0    | 3.519186  | -6.670509 | 0.729019  |
| 55     | 6      | 0    | 4.001105  | -6.299504 | 2.005206  |
| 56     | 6      | 0    | 3.191839  | -6.276840 | 3.129286  |
| 57     | 6      | 0    | 1.654088  | -7.503742 | -0.698499 |

|     |   |   |           |            |           |
|-----|---|---|-----------|------------|-----------|
| 58  | 6 | 0 | 4.357118  | -6.586401  | -0.458096 |
| 59  | 6 | 0 | 3.887227  | -7.172269  | -1.664832 |
| 60  | 6 | 0 | 2.535633  | -7.639597  | -1.739186 |
| 61  | 6 | 0 | 4.701431  | -7.100352  | -2.821465 |
| 62  | 6 | 0 | 5.845158  | -6.330287  | -2.838493 |
| 63  | 6 | 0 | 6.239164  | -5.601008  | -1.687702 |
| 64  | 6 | 0 | 5.532060  | -5.805059  | -0.505117 |
| 65  | 6 | 0 | 3.732874  | -5.892491  | 4.484640  |
| 66  | 1 | 0 | 4.370093  | -7.601900  | -3.727143 |
| 67  | 1 | 0 | 6.420237  | -6.234800  | -3.754864 |
| 68  | 1 | 0 | 5.807738  | -5.217921  | 0.363309  |
| 69  | 1 | 0 | 2.167881  | -7.980407  | -2.703389 |
| 70  | 1 | 0 | 0.284461  | -7.270457  | 1.663103  |
| 71  | 1 | 0 | 1.169965  | -6.590362  | 3.835947  |
| 72  | 1 | 0 | 5.048939  | -6.038528  | 2.115605  |
| 73  | 1 | 0 | 3.189779  | -5.035824  | 4.900403  |
| 74  | 1 | 0 | 3.629607  | -6.714651  | 5.202681  |
| 75  | 1 | 0 | 4.791617  | -5.624771  | 4.433003  |
| 76  | 6 | 0 | -1.314011 | -10.420160 | 0.876271  |
| 77  | 6 | 0 | -0.389683 | -9.552408  | 0.333464  |
| 78  | 6 | 0 | -0.790942 | -8.410367  | -0.399421 |
| 79  | 6 | 0 | -2.190028 | -8.166957  | -0.577503 |
| 80  | 6 | 0 | -3.104556 | -9.081916  | -0.006966 |
| 81  | 6 | 0 | -2.699063 | -10.195655 | 0.712213  |
| 82  | 6 | 0 | 0.184419  | -7.516132  | -0.989415 |
| 83  | 6 | 0 | -2.631607 | -7.002371  | -1.338888 |
| 84  | 6 | 0 | -1.641850 | -6.255265  | -2.036460 |
| 85  | 6 | 0 | -0.257967 | -6.537101  | -1.837455 |
| 86  | 6 | 0 | -2.032125 | -5.156372  | -2.831764 |
| 87  | 6 | 0 | -3.340899 | -4.740747  | -2.866554 |
| 88  | 6 | 0 | -4.336132 | -5.402828  | -2.100514 |
| 89  | 6 | 0 | -3.969885 | -6.543316  | -1.385453 |
| 90  | 6 | 0 | -3.700711 | -11.159692 | 1.300374  |
| 91  | 1 | 0 | -3.601014 | -3.846041  | -3.420688 |
| 92  | 1 | 0 | -4.733389 | -7.063673  | -0.817098 |
| 93  | 1 | 0 | -1.268420 | -4.603093  | -3.371715 |
| 94  | 1 | 0 | 0.463861  | -5.874073  | -2.304833 |
| 95  | 1 | 0 | -4.168398 | -8.926380  | -0.155447 |
| 96  | 1 | 0 | 0.672016  | -9.743054  | 0.455445  |
| 97  | 1 | 0 | -0.974914 | -11.293296 | 1.428140  |
| 98  | 1 | 0 | -3.600983 | -11.220664 | 2.390543  |
| 99  | 1 | 0 | -4.727348 | -10.859093 | 1.074791  |
| 100 | 1 | 0 | -3.554639 | -12.173501 | 0.909785  |
| 101 | 6 | 0 | -9.546259 | -3.438786  | 3.125231  |
| 102 | 6 | 0 | -9.592458 | -2.414084  | 2.201180  |
| 103 | 6 | 0 | -8.882999 | -2.486880  | 0.979429  |
| 104 | 6 | 0 | -8.122292 | -3.664586  | 0.710890  |
| 105 | 6 | 0 | -8.093231 | -4.690385  | 1.681929  |
| 106 | 6 | 0 | -8.782995 | -4.600852  | 2.881359  |
| 107 | 6 | 0 | -8.936828 | -1.416231  | -0.007260 |
| 108 | 6 | 0 | -7.413245 | -3.787288  | -0.555459 |
| 109 | 6 | 0 | -7.743184 | -2.867683  | -1.588154 |
| 110 | 6 | 0 | -8.492681 | -1.691482  | -1.277775 |
| 111 | 6 | 0 | -7.155127 | -3.035639  | -2.864000 |
| 112 | 6 | 0 | -6.152512 | -3.956772  | -3.063534 |
| 113 | 6 | 0 | -5.662147 | -4.741678  | -1.986663 |
| 114 | 6 | 0 | -6.350615 | -4.691671  | -0.774637 |
| 115 | 6 | 0 | -8.743968 | -5.715736  | 3.898022  |
| 116 | 1 | 0 | -7.464165 | -2.381301  | -3.674884 |

|     |   |   |            |           |           |
|-----|---|---|------------|-----------|-----------|
| 117 | 1 | 0 | -5.693131  | -4.045797 | -4.042665 |
| 118 | 1 | 0 | -5.974516  | -5.271547 | 0.061382  |
| 119 | 1 | 0 | -8.545307  | -0.924057 | -2.042999 |
| 120 | 1 | 0 | -10.199956 | -1.537852 | 2.400435  |
| 121 | 1 | 0 | -10.116805 | -3.356895 | 4.047073  |
| 122 | 1 | 0 | -7.539797  | -5.599657 | 1.468072  |
| 123 | 1 | 0 | -8.301365  | -5.376620 | 4.842133  |
| 124 | 1 | 0 | -9.751595  | -6.079244 | 4.130311  |
| 125 | 1 | 0 | -8.155264  | -6.564457 | 3.539840  |
| 126 | 6 | 0 | -11.261599 | 1.495112  | -2.407367 |
| 127 | 6 | 0 | -10.675007 | 0.573392  | -1.563368 |
| 128 | 6 | 0 | -9.790419  | 0.970409  | -0.533274 |
| 129 | 6 | 0 | -9.525979  | 2.364990  | -0.371211 |
| 130 | 6 | 0 | -10.140030 | 3.278489  | -1.257229 |
| 131 | 6 | 0 | -10.995866 | 2.874554  | -2.270590 |
| 132 | 6 | 0 | -9.181186  | 0.004883  | 0.370989  |
| 133 | 6 | 0 | -8.647846  | 2.810654  | 0.703222  |
| 134 | 6 | 0 | -8.319055  | 1.869942  | 1.717906  |
| 135 | 6 | 0 | -8.585527  | 0.482053  | 1.512527  |
| 136 | 6 | 0 | -7.562065  | 2.297801  | 2.832627  |
| 137 | 6 | 0 | -7.014484  | 3.560037  | 2.871386  |
| 138 | 6 | 0 | -7.177946  | 4.452191  | 1.780382  |
| 139 | 6 | 0 | -8.042782  | 4.086526  | 0.749728  |
| 140 | 6 | 0 | -11.649479 | 3.873029  | -3.194841 |
| 141 | 1 | 0 | -6.360394  | 3.838439  | 3.691252  |
| 142 | 1 | 0 | -8.190845  | 4.777629  | -0.073714 |
| 143 | 1 | 0 | -7.348673  | 1.586352  | 3.626000  |
| 144 | 1 | 0 | -8.143082  | -0.213575 | 2.217608  |
| 145 | 1 | 0 | -9.965852  | 4.341224  | -1.119630 |
| 146 | 1 | 0 | -10.908859 | -0.480132 | -1.673240 |
| 147 | 1 | 0 | -11.948744 | 1.156184  | -3.178744 |
| 148 | 1 | 0 | -11.363253 | 4.898167  | -2.945167 |
| 149 | 1 | 0 | -11.367976 | 3.691301  | -4.238796 |
| 150 | 1 | 0 | -12.742519 | 3.807799  | -3.143365 |
| 151 | 6 | 0 | 9.545609   | 3.439450  | -3.125390 |
| 152 | 6 | 0 | 9.591961   | 2.414677  | -2.201427 |
| 153 | 6 | 0 | 8.882733   | 2.487395  | -0.979538 |
| 154 | 6 | 0 | 8.122109   | 3.665092  | -0.710761 |
| 155 | 6 | 0 | 8.092855   | 4.690955  | -1.681729 |
| 156 | 6 | 0 | 8.782380   | 4.601498  | -2.881299 |
| 157 | 6 | 0 | 8.936710   | 1.416658  | 0.007046  |
| 158 | 6 | 0 | 7.413306   | 3.787717  | 0.555730  |
| 159 | 6 | 0 | 7.743417   | 2.868022  | 1.588294  |
| 160 | 6 | 0 | 8.492807   | 1.691809  | 1.277667  |
| 161 | 6 | 0 | 7.155619   | 3.035919  | 2.864262  |
| 162 | 6 | 0 | 6.153070   | 3.957077  | 3.064053  |
| 163 | 6 | 0 | 5.662501   | 4.742053  | 1.987330  |
| 164 | 6 | 0 | 6.350737   | 4.692098  | 0.775164  |
| 165 | 6 | 0 | 8.743096   | 5.716389  | -3.897941 |
| 166 | 1 | 0 | 7.464786   | 2.381523  | 3.675049  |
| 167 | 1 | 0 | 5.693901   | 4.046050  | 4.043288  |
| 168 | 1 | 0 | 5.974486   | 5.272023  | -0.060752 |
| 169 | 1 | 0 | 8.545535   | 0.924310  | 2.042811  |
| 170 | 1 | 0 | 10.199418  | 1.538454  | -2.400855 |
| 171 | 1 | 0 | 10.115996  | 3.357635  | -4.047335 |
| 172 | 1 | 0 | 7.539455   | 5.600210  | -1.467700 |
| 173 | 1 | 0 | 8.154444   | 6.565100  | -3.539642 |
| 174 | 1 | 0 | 9.750659   | 6.079916  | -4.130460 |
| 175 | 1 | 0 | 8.300270   | 5.377251  | -4.841940 |

|     |   |   |           |           |           |
|-----|---|---|-----------|-----------|-----------|
| 176 | 6 | 0 | 11.261897 | -1.495040 | 2.406283  |
| 177 | 6 | 0 | 10.675144 | -0.573209 | 1.562528  |
| 178 | 6 | 0 | 9.790308  | -0.970083 | 0.532583  |
| 179 | 6 | 0 | 9.525788  | -2.364638 | 0.370419  |
| 180 | 6 | 0 | 10.140010 | -3.278258 | 1.256207  |
| 181 | 6 | 0 | 10.996078 | -2.874462 | 2.269419  |
| 182 | 6 | 0 | 9.180905  | -0.004426 | -0.371405 |
| 183 | 6 | 0 | 8.647393  | -2.810156 | -0.703855 |
| 184 | 6 | 0 | 8.318290  | -1.869288 | -1.718279 |
| 185 | 6 | 0 | 8.584852  | -0.481440 | -1.512809 |
| 186 | 6 | 0 | 7.560960  | -2.296978 | -2.832855 |
| 187 | 6 | 0 | 7.013427  | -3.559215 | -2.871675 |
| 188 | 6 | 0 | 7.177273  | -4.451589 | -1.780886 |
| 189 | 6 | 0 | 8.042378  | -4.086064 | -0.750422 |
| 190 | 6 | 0 | 11.649815 | -3.873053 | 3.193461  |
| 191 | 1 | 0 | 6.359115  | -3.837514 | -3.691398 |
| 192 | 1 | 0 | 8.190743  | -4.777305 | 0.072847  |
| 193 | 1 | 0 | 7.347329  | -1.585389 | -3.626036 |
| 194 | 1 | 0 | 8.142221  | 0.214291  | -2.217670 |
| 195 | 1 | 0 | 9.965759  | -4.340969 | 1.118530  |
| 196 | 1 | 0 | 10.909067 | 0.480295  | 1.672448  |
| 197 | 1 | 0 | 11.949233 | -1.156228 | 3.177543  |
| 198 | 1 | 0 | 11.368028 | -3.691761 | 4.237419  |
| 199 | 1 | 0 | 11.363955 | -4.898192 | 2.943381  |
| 200 | 1 | 0 | 12.742843 | -3.807451 | 3.142249  |

**Table S19.** Cartesian coordinate of Z,R,Z,R,Z,R,Z,S (17)

SCF Done: E(RB3LYP) = -4621.33608502 A.U. after 14 cycles

| Center<br>Number | Atomic<br>Number | Atomic<br>Type | Coordinates (Angstroms) |           |           |
|------------------|------------------|----------------|-------------------------|-----------|-----------|
|                  |                  |                | X                       | Y         | Z         |
| 1                | 6                | 0              | 10.894657               | -0.991916 | 2.319348  |
| 2                | 6                | 0              | 10.245038               | -0.154490 | 1.434986  |
| 3                | 6                | 0              | 9.360443                | -0.657423 | 0.451741  |
| 4                | 6                | 0              | 9.167414                | -2.070684 | 0.378625  |
| 5                | 6                | 0              | 9.845587                | -2.896374 | 1.303590  |
| 6                | 6                | 0              | 10.697700               | -2.388842 | 2.272160  |
| 7                | 6                | 0              | 8.681138                | 0.218732  | -0.492761 |
| 8                | 6                | 0              | 8.297478                | -2.626206 | -0.649429 |
| 9                | 6                | 0              | 7.889711                | -1.766585 | -1.706664 |
| 10               | 6                | 0              | 8.079958                | -0.355699 | -1.585585 |
| 11               | 6                | 0              | 7.145016                | -2.304824 | -2.781916 |
| 12               | 6                | 0              | 6.688936                | -3.603792 | -2.746037 |
| 13               | 6                | 0              | 6.930767                | -4.420084 | -1.611857 |
| 14               | 6                | 0              | 7.777492                | -3.939277 | -0.615324 |
| 15               | 6                | 0              | 11.418715               | -3.294906 | 3.240368  |
| 16               | 1                | 0              | 6.872261                | -1.653652 | -3.608214 |
| 17               | 1                | 0              | 6.048952                | -3.975594 | -3.540099 |
| 18               | 1                | 0              | 7.979553                | -4.573403 | 0.241697  |
| 19               | 1                | 0              | 7.586220                | 0.273828  | -2.318586 |
| 20               | 1                | 0              | 10.426576               | 0.913961  | 1.476043  |
| 21               | 1                | 0              | 11.578666               | -0.572133 | 3.052822  |
| 22               | 1                | 0              | 9.725081                | -3.972924 | 1.233143  |
| 23               | 1                | 0              | 11.146164               | -3.065542 | 4.277315  |
| 24               | 1                | 0              | 12.505787               | -3.176980 | 3.162847  |
| 25               | 1                | 0              | 11.182015               | -4.346461 | 3.057702  |
| 26               | 6                | 0              | 8.916780                | 3.489769  | -3.458693 |

|    |   |   |            |           |           |
|----|---|---|------------|-----------|-----------|
| 27 | 6 | 0 | 8.988186   | 2.520004  | -2.479010 |
| 28 | 6 | 0 | 8.314740   | 2.664620  | -1.242918 |
| 29 | 6 | 0 | 7.566298   | 3.860128  | -1.019241 |
| 30 | 6 | 0 | 7.511461   | 4.828258  | -2.047087 |
| 31 | 6 | 0 | 8.163699   | 4.666934  | -3.259658 |
| 32 | 6 | 0 | 8.398359   | 1.653030  | -0.198452 |
| 33 | 6 | 0 | 6.901890   | 4.064179  | 0.261097  |
| 34 | 6 | 0 | 7.243560   | 3.191407  | 1.329967  |
| 35 | 6 | 0 | 7.974307   | 1.993746  | 1.062816  |
| 36 | 6 | 0 | 6.704002   | 3.441289  | 2.613710  |
| 37 | 6 | 0 | 5.746084   | 4.410815  | 2.802624  |
| 38 | 6 | 0 | 5.247035   | 5.163391  | 1.706692  |
| 39 | 6 | 0 | 5.880041   | 5.016134  | 0.472186  |
| 40 | 6 | 0 | 8.095403   | 5.721096  | -4.337667 |
| 41 | 1 | 0 | 5.334192   | 4.569476  | 3.793772  |
| 42 | 1 | 0 | 5.493898   | 5.567231  | -0.378224 |
| 43 | 1 | 0 | 7.021260   | 2.818686  | 3.446158  |
| 44 | 1 | 0 | 8.047574   | 1.269429  | 1.867375  |
| 45 | 1 | 0 | 6.967852   | 5.751085  | -1.870271 |
| 46 | 1 | 0 | 9.589450   | 1.632816  | -2.644974 |
| 47 | 1 | 0 | 9.459674   | 3.352894  | -4.390663 |
| 48 | 1 | 0 | 9.096335   | 6.061604  | -4.626737 |
| 49 | 1 | 0 | 7.525604   | 6.594320  | -4.008963 |
| 50 | 1 | 0 | 7.616542   | 5.331543  | -5.243886 |
| 51 | 6 | 0 | -7.217817  | -2.039270 | 2.813951  |
| 52 | 6 | 0 | -7.648490  | -1.565027 | 1.591938  |
| 53 | 6 | 0 | -7.644655  | -2.382414 | 0.434982  |
| 54 | 6 | 0 | -7.105758  | -3.698924 | 0.553971  |
| 55 | 6 | 0 | -6.690921  | -4.157172 | 1.825106  |
| 56 | 6 | 0 | -6.746830  | -3.361933 | 2.957879  |
| 57 | 6 | 0 | -8.121280  | -1.915823 | -0.860787 |
| 58 | 6 | 0 | -6.927169  | -4.508617 | -0.641561 |
| 59 | 6 | 0 | -7.569013  | -4.099432 | -1.841286 |
| 60 | 6 | 0 | -8.181667  | -2.806313 | -1.902252 |
| 61 | 6 | 0 | -7.397020  | -4.883415 | -3.008727 |
| 62 | 6 | 0 | -6.477212  | -5.910577 | -3.044064 |
| 63 | 6 | 0 | -5.697139  | -6.217167 | -1.900172 |
| 64 | 6 | 0 | -5.997379  | -5.569136 | -0.704800 |
| 65 | 6 | 0 | -6.316440  | -3.878825 | 4.308703  |
| 66 | 1 | 0 | -7.939175  | -4.607958 | -3.909734 |
| 67 | 1 | 0 | -6.301663  | -6.449332 | -3.970725 |
| 68 | 1 | 0 | -5.375253  | -5.773885 | 0.159014  |
| 69 | 1 | 0 | -8.562272  | -2.470143 | -2.863135 |
| 70 | 1 | 0 | -8.007369  | -0.546628 | 1.520637  |
| 71 | 1 | 0 | -7.248053  | -1.384665 | 3.681567  |
| 72 | 1 | 0 | -6.331288  | -5.176811 | 1.923057  |
| 73 | 1 | 0 | -7.148212  | -3.867404 | 5.023024  |
| 74 | 1 | 0 | -5.520204  | -3.258311 | 4.736025  |
| 75 | 1 | 0 | -5.944357  | -4.904922 | 4.245606  |
| 76 | 6 | 0 | -11.131126 | 0.914569  | 0.830683  |
| 77 | 6 | 0 | -10.255705 | 0.028759  | 0.237501  |
| 78 | 6 | 0 | -9.145553  | 0.480578  | -0.514329 |
| 79 | 6 | 0 | -8.945412  | 1.889913  | -0.659263 |
| 80 | 6 | 0 | -9.864747  | 2.764406  | -0.036129 |
| 81 | 6 | 0 | -10.946638 | 2.309204  | 0.702064  |
| 82 | 6 | 0 | -8.240596  | -0.452049 | -1.156500 |
| 83 | 6 | 0 | -7.817240  | 2.383075  | -1.442760 |
| 84 | 6 | 0 | -7.096737  | 1.438986  | -2.225535 |
| 85 | 6 | 0 | -7.329348  | 0.042318  | -2.051912 |



|     |   |   |            |           |           |
|-----|---|---|------------|-----------|-----------|
| 86  | 6 | 0 | -6.047590  | 1.884858  | -3.058388 |
| 87  | 6 | 0 | -5.631201  | 3.194058  | -3.026649 |
| 88  | 6 | 0 | -6.239629  | 4.129490  | -2.149094 |
| 89  | 6 | 0 | -7.355494  | 3.720262  | -1.417764 |
| 90  | 6 | 0 | -11.919705 | 3.267550  | 1.344984  |
| 91  | 1 | 0 | -4.764184  | 3.491232  | -3.605837 |
| 92  | 1 | 0 | -7.840107  | 4.439163  | -0.765440 |
| 93  | 1 | 0 | -5.522182  | 1.159539  | -3.673854 |
| 94  | 1 | 0 | -6.662213  | -0.644527 | -2.563657 |
| 95  | 1 | 0 | -9.740899  | 3.835546  | -0.161788 |
| 96  | 1 | 0 | -10.416084 | -1.040655 | 0.333920  |
| 97  | 1 | 0 | -11.980146 | 0.537032  | 1.395106  |
| 98  | 1 | 0 | -11.647991 | 4.308006  | 1.147910  |
| 99  | 1 | 0 | -11.953603 | 3.129868  | 2.432161  |
| 100 | 1 | 0 | -12.938527 | 3.110689  | 0.971964  |
| 101 | 6 | 0 | -3.777866  | 8.388443  | 3.638836  |
| 102 | 6 | 0 | -2.777624  | 8.485558  | 2.692674  |
| 103 | 6 | 0 | -2.955634  | 7.996085  | 1.377122  |
| 104 | 6 | 0 | -4.205578  | 7.396282  | 1.043718  |
| 105 | 6 | 0 | -5.205069  | 7.308516  | 2.038496  |
| 106 | 6 | 0 | -5.017547  | 7.789538  | 3.325139  |
| 107 | 6 | 0 | -1.915465  | 8.114923  | 0.365588  |
| 108 | 6 | 0 | -4.416899  | 6.895183  | -0.306198 |
| 109 | 6 | 0 | -3.502408  | 7.299557  | -1.317450 |
| 110 | 6 | 0 | -2.259225  | 7.902983  | -0.946804 |
| 111 | 6 | 0 | -3.750960  | 6.903349  | -2.653564 |
| 112 | 6 | 0 | -4.740938  | 5.992773  | -2.948908 |
| 113 | 6 | 0 | -5.523387  | 5.410756  | -1.916758 |
| 114 | 6 | 0 | -5.398169  | 5.933682  | -0.630376 |
| 115 | 6 | 0 | -6.105947  | 7.699544  | 4.366976  |
| 116 | 1 | 0 | -3.100556  | 7.274758  | -3.441171 |
| 117 | 1 | 0 | -4.883150  | 5.669663  | -3.975350 |
| 118 | 1 | 0 | -5.972669  | 5.484029  | 0.172046  |
| 119 | 1 | 0 | -1.508362  | 8.015661  | -1.723094 |
| 120 | 1 | 0 | -1.837027  | 8.960581  | 2.949870  |
| 121 | 1 | 0 | -3.614877  | 8.789748  | 4.636042  |
| 122 | 1 | 0 | -6.168503  | 6.880681  | 1.778371  |
| 123 | 1 | 0 | -6.386760  | 8.692600  | 4.736752  |
| 124 | 1 | 0 | -5.776717  | 7.117119  | 5.235513  |
| 125 | 1 | 0 | -7.005582  | 7.224119  | 3.967271  |
| 126 | 6 | 0 | 1.096828   | 10.794125 | -1.476408 |
| 127 | 6 | 0 | 0.152312   | 10.038935 | -0.812229 |
| 128 | 6 | 0 | 0.521299   | 8.954599  | 0.018694  |
| 129 | 6 | 0 | 1.912807   | 8.656552  | 0.168961  |
| 130 | 6 | 0 | 2.848993   | 9.454130  | -0.527929 |
| 131 | 6 | 0 | 2.473201   | 10.508503 | -1.345680 |
| 132 | 6 | 0 | -0.472503  | 8.177732  | 0.739267  |
| 133 | 6 | 0 | 2.328665   | 7.552590  | 1.027663  |
| 134 | 6 | 0 | 1.338243   | 6.949170  | 1.851775  |
| 135 | 6 | 0 | -0.036608  | 7.284476  | 1.684634  |
| 136 | 6 | 0 | 1.710834   | 5.908349  | 2.731352  |
| 137 | 6 | 0 | 2.988852   | 5.403842  | 2.727790  |
| 138 | 6 | 0 | 3.973407   | 5.916420  | 1.842363  |
| 139 | 6 | 0 | 3.634578   | 7.009982  | 1.044425  |
| 140 | 6 | 0 | 3.498001   | 11.347366 | -2.069892 |
| 141 | 1 | 0 | 3.222723   | 4.548446  | 3.351304  |
| 142 | 1 | 0 | 4.389760   | 7.420572  | 0.383056  |
| 143 | 1 | 0 | 0.950638   | 5.463776  | 3.368051  |
| 144 | 1 | 0 | -0.761435  | 6.702017  | 2.244013  |

|     |   |   |           |            |           |
|-----|---|---|-----------|------------|-----------|
| 145 | 1 | 0 | 3.908407  | 9.255513   | -0.400690 |
| 146 | 1 | 0 | -0.899483 | 10.286441  | -0.907446 |
| 147 | 1 | 0 | 0.779538  | 11.628496  | -2.097028 |
| 148 | 1 | 0 | 3.362034  | 11.290423  | -3.156390 |
| 149 | 1 | 0 | 4.516533  | 11.021146  | -1.843117 |
| 150 | 1 | 0 | 3.414950  | 12.404784  | -1.793199 |
| 151 | 6 | 0 | 1.585054  | -6.444200  | 3.148123  |
| 152 | 6 | 0 | 1.197887  | -7.080186  | 1.987073  |
| 153 | 6 | 0 | 2.090780  | -7.256563  | 0.900235  |
| 154 | 6 | 0 | 3.388714  | -6.672480  | 1.010323  |
| 155 | 6 | 0 | 3.759800  | -6.052133  | 2.225781  |
| 156 | 6 | 0 | 2.893403  | -5.937522  | 3.299682  |
| 157 | 6 | 0 | 1.719109  | -7.963584  | -0.319978 |
| 158 | 6 | 0 | 4.269423  | -6.659958  | -0.147590 |
| 159 | 6 | 0 | 3.924976  | -7.450646  | -1.277047 |
| 160 | 6 | 0 | 2.659167  | -8.119031  | -1.307171 |
| 161 | 6 | 0 | 4.765166  | -7.415909  | -2.417412 |
| 162 | 6 | 0 | 5.811583  | -6.520668  | -2.505169 |
| 163 | 6 | 0 | 6.087980  | -5.632469  | -1.435868 |
| 164 | 6 | 0 | 5.357270  | -5.768152  | -0.258923 |
| 165 | 6 | 0 | 3.318093  | -5.285535  | 4.592549  |
| 166 | 1 | 0 | 4.527986  | -8.058570  | -3.261459 |
| 167 | 1 | 0 | 6.402276  | -6.462666  | -3.414869 |
| 168 | 1 | 0 | 5.540303  | -5.055905  | 0.536926  |
| 169 | 1 | 0 | 2.393509  | -8.665615  | -2.208158 |
| 170 | 1 | 0 | 0.187543  | -7.458158  | 1.911035  |
| 171 | 1 | 0 | 0.871798  | -6.337811  | 3.961801  |
| 172 | 1 | 0 | 4.766461  | -5.660443  | 2.330015  |
| 173 | 1 | 0 | 3.270540  | -5.992471  | 5.429389  |
| 174 | 1 | 0 | 2.662392  | -4.444907  | 4.847510  |
| 175 | 1 | 0 | 4.341690  | -4.906081  | 4.533275  |
| 176 | 6 | 0 | -0.863009 | -10.783487 | 1.960560  |
| 177 | 6 | 0 | -0.042336 | -9.992569  | 1.183338  |
| 178 | 6 | 0 | -0.572262 | -9.111246  | 0.211713  |
| 179 | 6 | 0 | -1.989724 | -9.061764  | 0.037875  |
| 180 | 6 | 0 | -2.798089 | -9.883165  | 0.856490  |
| 181 | 6 | 0 | -2.267004 | -10.738323 | 1.809901  |
| 182 | 6 | 0 | 0.289449  | -8.289437  | -0.618442 |
| 183 | 6 | 0 | -2.559587 | -8.189359  | -0.981368 |
| 184 | 6 | 0 | -1.671862 | -7.628081  | -1.940778 |
| 185 | 6 | 0 | -0.262147 | -7.678484  | -1.714084 |
| 186 | 6 | 0 | -2.201010 | -6.882016  | -3.017608 |
| 187 | 6 | 0 | -3.539215 | -6.565174  | -3.064278 |
| 188 | 6 | 0 | -4.409239 | -6.952977  | -2.012514 |
| 189 | 6 | 0 | -3.920934 | -7.808363  | -1.026778 |
| 190 | 6 | 0 | -3.152309 | -11.619359 | 2.657567  |
| 191 | 1 | 0 | -3.914210 | -5.917922  | -3.850451 |
| 192 | 1 | 0 | -4.592537 | -8.125254  | -0.235368 |
| 193 | 1 | 0 | -1.521408 | -6.494915  | -3.772210 |
| 194 | 1 | 0 | 0.372642  | -7.089371  | -2.369228 |
| 195 | 1 | 0 | -3.874039 | -9.873287  | 0.711357  |
| 196 | 1 | 0 | 1.034896  | -10.043917 | 1.305581  |
| 197 | 1 | 0 | -0.425013 | -11.458187 | 2.691913  |
| 198 | 1 | 0 | -4.210438 | -11.456360 | 2.436254  |
| 199 | 1 | 0 | -2.999050 | -11.426649 | 3.725831  |
| 200 | 1 | 0 | -2.934881 | -12.680914 | 2.490716  |

Table S20. Cartesian coordinate of  $E,R,Z,R,E,R,E,S$  (18)

SCF Done: E(RB3LYP) = -4621.33534271 A.U. after 14 cycles

| Center<br>Number | Atomic<br>Number | Atomic<br>Type | Coordinates (Angstroms) |            |           |
|------------------|------------------|----------------|-------------------------|------------|-----------|
|                  |                  |                | X                       | Y          | Z         |
| 1                | 6                | 0              | 3.318692                | -7.003991  | 2.668648  |
| 2                | 6                | 0              | 2.706042                | -7.355913  | 1.483882  |
| 3                | 6                | 0              | 3.330369                | -7.140191  | 0.229805  |
| 4                | 6                | 0              | 4.586209                | -6.461985  | 0.224929  |
| 5                | 6                | 0              | 5.196118                | -6.139442  | 1.459044  |
| 6                | 6                | 0              | 4.597638                | -6.407362  | 2.678626  |
| 7                | 6                | 0              | 2.724235                | -7.542018  | -1.034177 |
| 8                | 6                | 0              | 5.172514                | -6.051327  | -1.041352 |
| 9                | 6                | 0              | 4.629312                | -6.571984  | -2.246677 |
| 10               | 6                | 0              | 3.423760                | -7.343453  | -2.197299 |
| 11               | 6                | 0              | 5.188382                | -6.158148  | -3.481148 |
| 12               | 6                | 0              | 6.122160                | -5.143760  | -3.535704 |
| 13               | 6                | 0              | 6.561939                | -4.507306  | -2.347595 |
| 14               | 6                | 0              | 6.136233                | -5.024219  | -1.127133 |
| 15               | 6                | 0              | 5.276774                | -6.071121  | 3.983551  |
| 16               | 1                | 0              | 4.811562                | -6.599353  | -4.400388 |
| 17               | 1                | 0              | 6.484888                | -4.791624  | -4.497104 |
| 18               | 1                | 0              | 6.436476                | -4.507796  | -0.223008 |
| 19               | 1                | 0              | 2.986185                | -7.665526  | -3.138520 |
| 20               | 1                | 0              | 1.727432                | -7.815178  | 1.518155  |
| 21               | 1                | 0              | 2.810166                | -7.196108  | 3.610247  |
| 22               | 1                | 0              | 6.177991                | -5.676985  | 1.454258  |
| 23               | 1                | 0              | 5.474524                | -6.973912  | 4.573671  |
| 24               | 1                | 0              | 4.649598                | -5.417618  | 4.600859  |
| 25               | 1                | 0              | 6.231068                | -5.563354  | 3.819847  |
| 26               | 6                | 0              | 0.851529                | -11.129944 | 0.812036  |
| 27               | 6                | 0              | 1.438857                | -10.073760 | 0.146733  |
| 28               | 6                | 0              | 0.663749                | -9.019598  | -0.391517 |
| 29               | 6                | 0              | -0.756023               | -9.071346  | -0.240844 |
| 30               | 6                | 0              | -1.320648               | -10.167613 | 0.450154  |
| 31               | 6                | 0              | -0.550153               | -11.192687 | 0.977465  |
| 32               | 6                | 0              | 1.277078                | -7.915932  | -1.106598 |
| 33               | 6                | 0              | -1.578586               | -8.011699  | -0.811284 |
| 34               | 6                | 0              | -0.960154               | -7.111450  | -1.722761 |
| 35               | 6                | 0              | 0.464765                | -7.080587  | -1.827864 |
| 36               | 6                | 0              | -1.751776               | -6.146433  | -2.385190 |
| 37               | 6                | 0              | -3.075361               | -5.970215  | -2.050834 |
| 38               | 6                | 0              | -3.664415               | -6.736723  | -1.012848 |
| 39               | 6                | 0              | -2.926554               | -7.778902  | -0.454055 |
| 40               | 6                | 0              | -1.179963               | -12.360924 | 1.696548  |
| 41               | 1                | 0              | -3.646285               | -5.165852  | -2.503159 |
| 42               | 1                | 0              | -3.382987               | -8.378232  | 0.327157  |
| 43               | 1                | 0              | -1.279936               | -5.489262  | -3.110857 |
| 44               | 1                | 0              | 0.909120                | -6.270698  | -2.398800 |
| 45               | 1                | 0              | -2.400435               | -10.231173 | 0.543466  |
| 46               | 1                | 0              | 2.516538                | -10.043670 | 0.020721  |
| 47               | 1                | 0              | 1.472644                | -11.930491 | 1.206100  |
| 48               | 1                | 0              | -0.946166               | -13.308701 | 1.197675  |
| 49               | 1                | 0              | -2.268137               | -12.265630 | 1.740591  |
| 50               | 1                | 0              | -0.808367               | -12.441669 | 2.724819  |
| 51               | 6                | 0              | -0.712430               | 7.570250   | -3.879512 |
| 52               | 6                | 0              | -1.194922               | 7.740130   | -2.598732 |
| 53               | 6                | 0              | -0.332254               | 8.020047   | -1.509496 |
| 54               | 6                | 0              | 1.071598                | 8.042958   | -1.763911 |

|     |   |   |           |           |           |
|-----|---|---|-----------|-----------|-----------|
| 55  | 6 | 0 | 1.527909  | 7.889591  | -3.093671 |
| 56  | 6 | 0 | 0.668298  | 7.666614  | -4.156009 |
| 57  | 6 | 0 | -0.823808 | 8.241709  | -0.155275 |
| 58  | 6 | 0 | 1.999815  | 8.156788  | -0.649314 |
| 59  | 6 | 0 | 1.489596  | 8.492114  | 0.634224  |
| 60  | 6 | 0 | 0.072830  | 8.553263  | 0.834021  |
| 61  | 6 | 0 | 2.393259  | 8.597360  | 1.720191  |
| 62  | 6 | 0 | 3.716785  | 8.232314  | 1.585292  |
| 63  | 6 | 0 | 4.207711  | 7.752981  | 0.344591  |
| 64  | 6 | 0 | 3.359007  | 7.794544  | -0.758206 |
| 65  | 6 | 0 | 1.178003  | 7.521011  | -5.568881 |
| 66  | 1 | 0 | 2.012202  | 8.909565  | 2.689201  |
| 67  | 1 | 0 | 4.379418  | 8.266098  | 2.445142  |
| 68  | 1 | 0 | 3.721412  | 7.391544  | -1.696428 |
| 69  | 1 | 0 | -0.293148 | 8.741330  | 1.839964  |
| 70  | 1 | 0 | -2.260173 | 7.665089  | -2.425854 |
| 71  | 1 | 0 | -1.407767 | 7.366181  | -4.690062 |
| 72  | 1 | 0 | 2.591357  | 7.964042  | -3.296532 |
| 73  | 1 | 0 | 0.763622  | 8.296646  | -6.223684 |
| 74  | 1 | 0 | 0.889200  | 6.554161  | -5.997318 |
| 75  | 1 | 0 | 2.267973  | 7.594547  | -5.612158 |
| 76  | 6 | 0 | -4.443447 | 10.356017 | -1.604945 |
| 77  | 6 | 0 | -3.323467 | 9.755012  | -1.068964 |
| 78  | 6 | 0 | -3.408967 | 8.526608  | -0.372224 |
| 79  | 6 | 0 | -4.690481 | 7.913131  | -0.225659 |
| 80  | 6 | 0 | -5.814582 | 8.558400  | -0.789914 |
| 81  | 6 | 0 | -5.718046 | 9.760870  | -1.473313 |
| 82  | 6 | 0 | -2.235180 | 7.901270  | 0.207495  |
| 83  | 6 | 0 | -4.805623 | 6.655813  | 0.502803  |
| 84  | 6 | 0 | -3.683135 | 6.221763  | 1.261662  |
| 85  | 6 | 0 | -2.415981 | 6.857438  | 1.076280  |
| 86  | 6 | 0 | -3.799115 | 5.064172  | 2.064053  |
| 87  | 6 | 0 | -4.927288 | 4.276545  | 2.009645  |
| 88  | 6 | 0 | -5.989134 | 4.599050  | 1.126622  |
| 89  | 6 | 0 | -5.934129 | 5.807744  | 0.434763  |
| 90  | 6 | 0 | -6.936960 | 10.436490 | -2.053149 |
| 91  | 1 | 0 | -4.963939 | 3.344254  | 2.563977  |
| 92  | 1 | 0 | -6.754963 | 6.064603  | -0.226843 |
| 93  | 1 | 0 | -2.950515 | 4.759713  | 2.670954  |
| 94  | 1 | 0 | -1.549466 | 6.401404  | 1.546163  |
| 95  | 1 | 0 | -6.797184 | 8.115992  | -0.657758 |
| 96  | 1 | 0 | -2.352186 | 10.228658 | -1.170165 |
| 97  | 1 | 0 | -4.347833 | 11.304893 | -2.126904 |
| 98  | 1 | 0 | -7.082924 | 11.433735 | -1.621840 |
| 99  | 1 | 0 | -7.844232 | 9.855622  | -1.867164 |
| 100 | 1 | 0 | -6.839850 | 10.569003 | -3.137103 |
| 101 | 6 | 0 | -9.735429 | -1.248151 | 4.334887  |
| 102 | 6 | 0 | -9.490320 | -1.671577 | 3.044038  |
| 103 | 6 | 0 | -8.951552 | -0.799704 | 2.068944  |
| 104 | 6 | 0 | -8.676826 | 0.549398  | 2.447641  |
| 105 | 6 | 0 | -8.936249 | 0.945996  | 3.778765  |
| 106 | 6 | 0 | -9.453820 | 0.078044  | 4.728082  |
| 107 | 6 | 0 | -8.705988 | -1.234118 | 0.701317  |
| 108 | 6 | 0 | -8.147913 | 1.479143  | 1.458307  |
| 109 | 6 | 0 | -8.197352 | 1.090746  | 0.090900  |
| 110 | 6 | 0 | -8.466982 | -0.270934 | -0.248171 |
| 111 | 6 | 0 | -7.789529 | 2.014008  | -0.900000 |
| 112 | 6 | 0 | -7.203572 | 3.211562  | -0.553081 |
| 113 | 6 | 0 | -6.978062 | 3.534942  | 0.808956  |

|     |   |   |            |           |           |
|-----|---|---|------------|-----------|-----------|
| 114 | 6 | 0 | -7.509716  | 2.695029  | 1.786438  |
| 115 | 6 | 0 | -9.731535  | 0.530549  | 6.141006  |
| 116 | 1 | 0 | -7.867746  | 1.729056  | -1.945877 |
| 117 | 1 | 0 | -6.809738  | 3.864973  | -1.325122 |
| 118 | 1 | 0 | -7.356235  | 2.950432  | 2.829834  |
| 119 | 1 | 0 | -8.306437  | -0.564337 | -1.280431 |
| 120 | 1 | 0 | -9.731673  | -2.689431 | 2.757233  |
| 121 | 1 | 0 | -10.164299 | -1.940474 | 5.055162  |
| 122 | 1 | 0 | -8.757243  | 1.978219  | 4.063653  |
| 123 | 1 | 0 | -9.496073  | 1.589443  | 6.276800  |
| 124 | 1 | 0 | -9.137042  | -0.039944 | 6.864409  |
| 125 | 1 | 0 | -10.784676 | 0.383650  | 6.407209  |
| 126 | 6 | 0 | -10.172598 | -3.238152 | -2.959950 |
| 127 | 6 | 0 | -9.841868  | -2.692678 | -1.735590 |
| 128 | 6 | 0 | -8.782906  | -3.214043 | -0.955853 |
| 129 | 6 | 0 | -8.062705  | -4.337957 | -1.461117 |
| 130 | 6 | 0 | -8.425413  | -4.866884 | -2.719965 |
| 131 | 6 | 0 | -9.459439  | -4.340219 | -3.478989 |
| 132 | 6 | 0 | -8.438768  | -2.657167 | 0.345009  |
| 133 | 6 | 0 | -6.984210  | -4.912845 | -0.668409 |
| 134 | 6 | 0 | -6.889663  | -4.530733 | 0.698371  |
| 135 | 6 | 0 | -7.620438  | -3.394361 | 1.165658  |
| 136 | 6 | 0 | -5.920878  | -5.154797 | 1.518800  |
| 137 | 6 | 0 | -4.969068  | -5.991728 | 0.977869  |
| 138 | 6 | 0 | -4.930104  | -6.228358 | -0.419555 |
| 139 | 6 | 0 | -5.975394  | -5.742469 | -1.203567 |
| 140 | 6 | 0 | -9.835669  | -4.931063 | -4.815966 |
| 141 | 1 | 0 | -4.172524  | -6.381973 | 1.603587  |
| 142 | 1 | 0 | -5.959440  | -5.939612 | -2.270609 |
| 143 | 1 | 0 | -5.880647  | -4.894727 | 2.573294  |
| 144 | 1 | 0 | -7.369388  | -3.017276 | 2.151687  |
| 145 | 1 | 0 | -7.900288  | -5.740807 | -3.093191 |
| 146 | 1 | 0 | -10.414109 | -1.857610 | -1.346084 |
| 147 | 1 | 0 | -11.002782 | -2.823750 | -3.526572 |
| 148 | 1 | 0 | -10.886124 | -5.243722 | -4.832372 |
| 149 | 1 | 0 | -9.222438  | -5.803665 | -5.055978 |
| 150 | 1 | 0 | -9.707685  | -4.200009 | -5.623093 |
| 151 | 6 | 0 | 11.360214  | -0.038644 | 1.632151  |
| 152 | 6 | 0 | 10.423019  | 0.833919  | 1.118831  |
| 153 | 6 | 0 | 9.454015   | 0.405474  | 0.181240  |
| 154 | 6 | 0 | 9.464712   | -0.960887 | -0.234524 |
| 155 | 6 | 0 | 10.437154  | -1.825943 | 0.316908  |
| 156 | 6 | 0 | 11.380985  | -1.394847 | 1.236682  |
| 157 | 6 | 0 | 8.479069   | 1.324743  | -0.375319 |
| 158 | 6 | 0 | 8.489743   | -1.419821 | -1.215815 |
| 159 | 6 | 0 | 7.750163   | -0.433786 | -1.926147 |
| 160 | 6 | 0 | 7.756152   | 0.920047  | -1.466831 |
| 161 | 6 | 0 | 6.883382   | -0.839078 | -2.966334 |
| 162 | 6 | 0 | 6.627062   | -2.172936 | -3.191483 |
| 163 | 6 | 0 | 7.206651   | -3.167112 | -2.362114 |
| 164 | 6 | 0 | 8.175910   | -2.780021 | -1.438683 |
| 165 | 6 | 0 | 12.420992  | -2.334899 | 1.796473  |
| 166 | 1 | 0 | 6.356784   | -0.078503 | -3.536759 |
| 167 | 1 | 0 | 5.889293   | -2.464407 | -3.932275 |
| 168 | 1 | 0 | 8.639009   | -3.543694 | -0.822182 |
| 169 | 1 | 0 | 7.049075   | 1.608309  | -1.920597 |
| 170 | 1 | 0 | 10.424612  | 1.874948  | 1.426097  |
| 171 | 1 | 0 | 12.100014  | 0.322289  | 2.342349  |
| 172 | 1 | 0 | 10.471990  | -2.858741 | -0.016134 |

|     |   |   |           |           |           |
|-----|---|---|-----------|-----------|-----------|
| 173 | 1 | 0 | 12.349126 | -2.402665 | 2.888391  |
| 174 | 1 | 0 | 13.435496 | -1.990160 | 1.564665  |
| 175 | 1 | 0 | 12.309839 | -3.343910 | 1.390619  |
| 176 | 6 | 0 | 6.994943  | 1.735958  | 3.723798  |
| 177 | 6 | 0 | 7.521571  | 1.628352  | 2.453599  |
| 178 | 6 | 0 | 7.527569  | 2.724179  | 1.554300  |
| 179 | 6 | 0 | 6.891193  | 3.929656  | 1.976338  |
| 180 | 6 | 0 | 6.386412  | 4.012111  | 3.294735  |
| 181 | 6 | 0 | 6.435755  | 2.948739  | 4.180071  |
| 182 | 6 | 0 | 8.114866  | 2.647320  | 0.221851  |
| 183 | 6 | 0 | 6.713158  | 5.016292  | 1.025740  |
| 184 | 6 | 0 | 7.399330  | 4.957326  | -0.217367 |
| 185 | 6 | 0 | 8.116817  | 3.768580  | -0.568070 |
| 186 | 6 | 0 | 7.215816  | 6.010955  | -1.146748 |
| 187 | 6 | 0 | 6.273899  | 6.996233  | -0.932032 |
| 188 | 6 | 0 | 5.475414  | 6.984663  | 0.239423  |
| 189 | 6 | 0 | 5.762932  | 6.040276  | 1.221015  |
| 190 | 6 | 0 | 5.905066  | 3.066247  | 5.587781  |
| 191 | 1 | 0 | 6.107380  | 7.761133  | -1.684921 |
| 192 | 1 | 0 | 5.126824  | 6.005409  | 2.097416  |
| 193 | 1 | 0 | 7.783741  | 5.995862  | -2.073544 |
| 194 | 1 | 0 | 8.574732  | 3.721036  | -1.552600 |
| 195 | 1 | 0 | 5.955963  | 4.948393  | 3.635040  |
| 196 | 1 | 0 | 7.946287  | 0.683586  | 2.142477  |
| 197 | 1 | 0 | 7.018156  | 0.874215  | 4.386352  |
| 198 | 1 | 0 | 5.130360  | 2.315946  | 5.784212  |
| 199 | 1 | 0 | 5.470739  | 4.052548  | 5.771807  |
| 200 | 1 | 0 | 6.698759  | 2.906461  | 6.327194  |

**Table S21.** Cartesian coordinate of  $E,R,Z,R,Z,R,Z,S$  (19)

SCF Done: E(RB3LYP) = -4621.33468730 A.U. after 14 cycles

| Center<br>Number | Atomic<br>Number | Atomic<br>Type | Coordinates (Angstroms) |           |           |
|------------------|------------------|----------------|-------------------------|-----------|-----------|
|                  |                  |                | X                       | Y         | Z         |
| 1                | 6                | 0              | 10.307486               | -1.465082 | 3.002743  |
| 2                | 6                | 0              | 9.996338                | -0.741312 | 1.869579  |
| 3                | 6                | 0              | 9.288662                | -1.322821 | 0.791033  |
| 4                | 6                | 0              | 8.907744                | -2.695480 | 0.894055  |
| 5                | 6                | 0              | 9.241621                | -3.403675 | 2.070661  |
| 6                | 6                | 0              | 9.927573                | -2.819268 | 3.124191  |
| 7                | 6                | 0              | 8.978700                | -0.571488 | -0.415537 |
| 8                | 6                | 0              | 8.195904                | -3.328466 | -0.208689 |
| 9                | 6                | 0              | 8.146719                | -2.637585 | -1.451247 |
| 10               | 6                | 0              | 8.537492                | -1.265110 | -1.515206 |
| 11               | 6                | 0              | 7.542977                | -3.268226 | -2.564233 |
| 12               | 6                | 0              | 6.877726                | -4.466041 | -2.424929 |
| 13               | 6                | 0              | 6.768531                | -5.086287 | -1.154276 |
| 14               | 6                | 0              | 7.483260                | -4.541442 | -0.088385 |
| 15               | 6                | 0              | 10.282237               | -3.602569 | 4.364743  |
| 16               | 1                | 0              | 7.542627                | -2.753257 | -3.521313 |
| 17               | 1                | 0              | 6.343511                | -4.887697 | -3.270420 |
| 18               | 1                | 0              | 7.422569                | -5.030714 | 0.877915  |
| 19               | 1                | 0              | 8.321568                | -0.729896 | -2.434350 |
| 20               | 1                | 0              | 10.315077               | 0.292134  | 1.787212  |
| 21               | 1                | 0              | 10.865515               | -0.991497 | 3.806724  |
| 22               | 1                | 0              | 8.983189                | -4.455590 | 2.142713  |
| 23               | 1                | 0              | 11.364552               | -3.605490 | 4.538287  |

|    |   |   |            |           |           |
|----|---|---|------------|-----------|-----------|
| 24 | 1 | 0 | 9.951962   | -4.642132 | 4.291155  |
| 25 | 1 | 0 | 9.817470   | -3.165876 | 5.256684  |
| 26 | 6 | 0 | 10.533559  | 1.994852  | -3.654641 |
| 27 | 6 | 0 | 10.175709  | 1.233535  | -2.560356 |
| 28 | 6 | 0 | 9.244489   | 1.704200  | -1.604711 |
| 29 | 6 | 0 | 8.683382   | 3.003308  | -1.791358 |
| 30 | 6 | 0 | 9.070040   | 3.752580  | -2.925443 |
| 31 | 6 | 0 | 9.977639   | 3.276350  | -3.859050 |
| 32 | 6 | 0 | 8.878960   | 0.916610  | -0.436649 |
| 33 | 6 | 0 | 7.738953   | 3.523127  | -0.811912 |
| 34 | 6 | 0 | 7.630594   | 2.844681  | 0.433760  |
| 35 | 6 | 0 | 8.203165   | 1.543017  | 0.581408  |
| 36 | 6 | 0 | 6.796917   | 3.387790  | 1.439546  |
| 37 | 6 | 0 | 5.977559   | 4.464112  | 1.176224  |
| 38 | 6 | 0 | 5.938936   | 5.038461  | -0.119415 |
| 39 | 6 | 0 | 6.862797   | 4.600057  | -1.066449 |
| 40 | 6 | 0 | 10.384205  | 4.102214  | -5.055252 |
| 41 | 1 | 0 | 5.275507   | 4.807646  | 1.929564  |
| 42 | 1 | 0 | 6.847586   | 5.051029  | -2.053170 |
| 43 | 1 | 0 | 6.748091   | 2.890289  | 2.404605  |
| 44 | 1 | 0 | 7.942155   | 0.984138  | 1.474572  |
| 45 | 1 | 0 | 8.670608   | 4.753687  | -3.055857 |
| 46 | 1 | 0 | 10.628015  | 0.258942  | -2.412098 |
| 47 | 1 | 0 | 11.264053  | 1.609360  | -4.361637 |
| 48 | 1 | 0 | 9.896472   | 5.080614  | -5.051915 |
| 49 | 1 | 0 | 10.119911  | 3.599531  | -5.993140 |
| 50 | 1 | 0 | 11.467684  | 4.267026  | -5.075987 |
| 51 | 6 | 0 | -7.424559  | -1.227700 | 2.618850  |
| 52 | 6 | 0 | -7.862364  | -0.755580 | 1.398897  |
| 53 | 6 | 0 | -7.925334  | -1.590474 | 0.255100  |
| 54 | 6 | 0 | -7.433487  | -2.923969 | 0.385142  |
| 55 | 6 | 0 | -7.016940  | -3.381527 | 1.656529  |
| 56 | 6 | 0 | -7.014831  | -2.568607 | 2.777347  |
| 57 | 6 | 0 | -8.423548  | -1.129596 | -1.036741 |
| 58 | 6 | 0 | -7.297910  | -3.755340 | -0.800494 |
| 59 | 6 | 0 | -7.915919  | -3.330610 | -2.007194 |
| 60 | 6 | 0 | -8.502605  | -2.025945 | -2.072900 |
| 61 | 6 | 0 | -7.766400  | -4.130612 | -3.167286 |
| 62 | 6 | 0 | -6.902215  | -5.206382 | -3.184541 |
| 63 | 6 | 0 | -6.161010  | -5.551379 | -2.026252 |
| 64 | 6 | 0 | -6.430936  | -4.867234 | -0.844264 |
| 65 | 6 | 0 | -6.582680  | -3.083815 | 4.128132  |
| 66 | 1 | 0 | -8.285076  | -3.836601 | -4.076249 |
| 67 | 1 | 0 | -6.747585  | -5.762474 | -4.104733 |
| 68 | 1 | 0 | -5.830561  | -5.099733 | 0.027276  |
| 69 | 1 | 0 | -8.898943  | -1.694092 | -3.028937 |
| 70 | 1 | 0 | -8.172171  | 0.277291  | 1.320803  |
| 71 | 1 | 0 | -7.402181  | -0.556202 | 3.473698  |
| 72 | 1 | 0 | -6.699781  | -4.413861 | 1.764605  |
| 73 | 1 | 0 | -7.399786  | -3.024640 | 4.856899  |
| 74 | 1 | 0 | -5.752165  | -2.492781 | 4.531340  |
| 75 | 1 | 0 | -6.257469  | -4.126266 | 4.074802  |
| 76 | 6 | 0 | -11.312806 | 1.651687  | 0.912931  |
| 77 | 6 | 0 | -10.499755 | 0.778320  | 0.220202  |
| 78 | 6 | 0 | -9.428177  | 1.244753  | -0.576897 |
| 79 | 6 | 0 | -9.204662  | 2.653305  | -0.661635 |
| 80 | 6 | 0 | -10.053416 | 3.516179  | 0.068165  |
| 81 | 6 | 0 | -11.098389 | 3.046697  | 0.849528  |
| 82 | 6 | 0 | -8.581110  | 0.331133  | -1.321647 |

|     |   |   |            |           |           |
|-----|---|---|------------|-----------|-----------|
| 83  | 6 | 0 | -8.129255  | 3.160337  | -1.504719 |
| 84  | 6 | 0 | -7.535363  | 2.257813  | -2.429665 |
| 85  | 6 | 0 | -7.766974  | 0.854299  | -2.292482 |
| 86  | 6 | 0 | -6.582180  | 2.743984  | -3.352698 |
| 87  | 6 | 0 | -6.104501  | 4.031491  | -3.259034 |
| 88  | 6 | 0 | -6.536279  | 4.884833  | -2.211181 |
| 89  | 6 | 0 | -7.586778  | 4.461855  | -1.398880 |
| 90  | 6 | 0 | -12.004051 | 3.990888  | 1.602390  |
| 91  | 1 | 0 | -5.306066  | 4.361171  | -3.916103 |
| 92  | 1 | 0 | -7.936333  | 5.125002  | -0.613950 |
| 93  | 1 | 0 | -6.168498  | 2.060597  | -4.089598 |
| 94  | 1 | 0 | -7.153529  | 0.185234  | -2.888410 |
| 95  | 1 | 0 | -9.907735  | 4.589061  | -0.013422 |
| 96  | 1 | 0 | -10.681271 | -0.290619 | 0.273172  |
| 97  | 1 | 0 | -12.136011 | 1.264004  | 1.507918  |
| 98  | 1 | 0 | -13.045401 | 3.889672  | 1.274939  |
| 99  | 1 | 0 | -11.707619 | 5.032972  | 1.456362  |
| 100 | 1 | 0 | -11.986938 | 3.784701  | 2.679011  |
| 101 | 6 | 0 | -2.073361  | 6.559145  | 3.475970  |
| 102 | 6 | 0 | -1.390262  | 7.072606  | 2.393117  |
| 103 | 6 | 0 | -2.029371  | 7.298166  | 1.148389  |
| 104 | 6 | 0 | -3.392484  | 6.894113  | 1.022431  |
| 105 | 6 | 0 | -4.067567  | 6.394714  | 2.159957  |
| 106 | 6 | 0 | -3.443165  | 6.231835  | 3.385165  |
| 107 | 6 | 0 | -1.341095  | 7.877971  | 0.001109  |
| 108 | 6 | 0 | -4.031755  | 6.931931  | -0.283733 |
| 109 | 6 | 0 | -3.384798  | 7.627258  | -1.340528 |
| 110 | 6 | 0 | -2.053302  | 8.117193  | -1.146679 |
| 111 | 6 | 0 | -3.997095  | 7.649131  | -2.618202 |
| 112 | 6 | 0 | -5.102512  | 6.869895  | -2.890968 |
| 113 | 6 | 0 | -5.667273  | 6.047029  | -1.884025 |
| 114 | 6 | 0 | -5.170334  | 6.155656  | -0.588191 |
| 115 | 6 | 0 | -4.189425  | 5.715541  | 4.590762  |
| 116 | 1 | 0 | -3.532651  | 8.229507  | -3.411358 |
| 117 | 1 | 0 | -5.511360  | 6.841739  | -3.896919 |
| 118 | 1 | 0 | -5.573269  | 5.493157  | 0.168922  |
| 119 | 1 | 0 | -1.550202  | 8.573403  | -1.995134 |
| 120 | 1 | 0 | -0.342146  | 7.315743  | 2.503655  |
| 121 | 1 | 0 | -1.548647  | 6.411186  | 4.416676  |
| 122 | 1 | 0 | -5.119873  | 6.142174  | 2.076862  |
| 123 | 1 | 0 | -4.212597  | 6.461565  | 5.394045  |
| 124 | 1 | 0 | -3.709658  | 4.819581  | 5.001431  |
| 125 | 1 | 0 | -5.222991  | 5.458978  | 4.343285  |
| 126 | 6 | 0 | 1.205260   | 10.451534 | 2.588836  |
| 127 | 6 | 0 | 0.421541   | 9.729700  | 1.712641  |
| 128 | 6 | 0 | 0.972070   | 8.712682  | 0.897609  |
| 129 | 6 | 0 | 2.373447   | 8.448575  | 0.989429  |
| 130 | 6 | 0 | 3.142452   | 9.206071  | 1.902258  |
| 131 | 6 | 0 | 2.590373   | 10.196511 | 2.700134  |
| 132 | 6 | 0 | 0.152685   | 7.964142  | -0.037018 |
| 133 | 6 | 0 | 2.971081   | 7.428799  | 0.135673  |
| 134 | 6 | 0 | 2.185532   | 6.917668  | -0.934519 |
| 135 | 6 | 0 | 0.783472   | 7.189895  | -0.975321 |
| 136 | 6 | 0 | 2.769512   | 6.015118  | -1.851505 |
| 137 | 6 | 0 | 4.036636   | 5.519405  | -1.643976 |
| 138 | 6 | 0 | 4.772684   | 5.884337  | -0.487846 |
| 139 | 6 | 0 | 4.251813   | 6.869201  | 0.349752  |
| 140 | 6 | 0 | 3.438239   | 11.002357 | 3.654221  |
| 141 | 1 | 0 | 4.438275   | 4.762506  | -2.309861 |



|     |   |   |           |            |           |
|-----|---|---|-----------|------------|-----------|
| 142 | 1 | 0 | 4.823844  | 7.162703   | 1.224025  |
| 143 | 1 | 0 | 2.174174  | 5.658472   | -2.687872 |
| 144 | 1 | 0 | 0.187800  | 6.649371   | -1.704818 |
| 145 | 1 | 0 | 4.212659  | 9.032860   | 1.959393  |
| 146 | 1 | 0 | -0.639657 | 9.943070   | 1.631699  |
| 147 | 1 | 0 | 0.755079  | 11.233789  | 3.194927  |
| 148 | 1 | 0 | 4.484164  | 10.685359  | 3.627487  |
| 149 | 1 | 0 | 3.082580  | 10.899207  | 4.686103  |
| 150 | 1 | 0 | 3.405481  | 12.070838  | 3.411016  |
| 151 | 6 | 0 | 0.741830  | -5.917045  | 3.180175  |
| 152 | 6 | 0 | 0.390900  | -6.639852  | 2.059363  |
| 153 | 6 | 0 | 1.349285  | -7.013476  | 1.084047  |
| 154 | 6 | 0 | 2.686916  | -6.548282  | 1.256622  |
| 155 | 6 | 0 | 3.015370  | -5.832053  | 2.431170  |
| 156 | 6 | 0 | 2.077445  | -5.517405  | 3.399766  |
| 157 | 6 | 0 | 1.006678  | -7.808032  | -0.089332 |
| 158 | 6 | 0 | 3.662724  | -6.763615  | 0.199247  |
| 159 | 6 | 0 | 3.328539  | -7.632460  | -0.875096 |
| 160 | 6 | 0 | 1.998828  | -8.156474  | -0.968944 |
| 161 | 6 | 0 | 4.276914  | -7.834433  | -1.907913 |
| 162 | 6 | 0 | 5.445044  | -7.101993  | -1.959397 |
| 163 | 6 | 0 | 5.731582  | -6.133488  | -0.964266 |
| 164 | 6 | 0 | 4.864867  | -6.030189  | 0.120331  |
| 165 | 6 | 0 | 2.455410  | -4.764692  | 4.651836  |
| 166 | 1 | 0 | 4.041868  | -8.537585  | -2.702882 |
| 167 | 1 | 0 | 6.132642  | -7.238215  | -2.789029 |
| 168 | 1 | 0 | 5.058313  | -5.256278  | 0.853230  |
| 169 | 1 | 0 | 1.749763  | -8.765650  | -1.833912 |
| 170 | 1 | 0 | -0.642092 | -6.932378  | 1.927649  |
| 171 | 1 | 0 | -0.021747 | -5.656674  | 3.909051  |
| 172 | 1 | 0 | 4.044090  | -5.526395  | 2.591405  |
| 173 | 1 | 0 | 2.268850  | -5.366189  | 5.549475  |
| 174 | 1 | 0 | 1.866698  | -3.845887  | 4.755255  |
| 175 | 1 | 0 | 3.512788  | -4.486832  | 4.649583  |
| 176 | 6 | 0 | -1.869848 | -10.275552 | 2.210227  |
| 177 | 6 | 0 | -0.959441 | -9.592890  | 1.430316  |
| 178 | 6 | 0 | -1.380763 | -8.742966  | 0.380715  |
| 179 | 6 | 0 | -2.780671 | -8.602679  | 0.137024  |
| 180 | 6 | 0 | -3.683202 | -9.315861  | 0.958478  |
| 181 | 6 | 0 | -3.258574 | -10.146165 | 1.984558  |
| 182 | 6 | 0 | -0.425800 | -8.038511  | -0.454248 |
| 183 | 6 | 0 | -3.236349 | -7.741398  | -0.946566 |
| 184 | 6 | 0 | -2.271298 | -7.296408  | -1.892532 |
| 185 | 6 | 0 | -0.878642 | -7.449053  | -1.605070 |
| 186 | 6 | 0 | -2.700670 | -6.554507  | -3.016408 |
| 187 | 6 | 0 | -4.004651 | -6.124488  | -3.122525 |
| 188 | 6 | 0 | -4.937852 | -6.394888  | -2.089314 |
| 189 | 6 | 0 | -4.557523 | -7.252471  | -1.058803 |
| 190 | 6 | 0 | -4.242339 | -10.912382 | 2.835242  |
| 191 | 1 | 0 | -4.295534 | -5.477462  | -3.943903 |
| 192 | 1 | 0 | -5.279259 | -7.480845  | -0.281260 |
| 193 | 1 | 0 | -1.966234 | -6.256682  | -3.760097 |
| 194 | 1 | 0 | -0.170495 | -6.950437  | -2.260524 |
| 195 | 1 | 0 | -4.747896 | -9.240237  | 0.759657  |
| 196 | 1 | 0 | 0.104586  | -9.709646  | 1.610027  |
| 197 | 1 | 0 | -1.515906 | -10.929996 | 3.002931  |
| 198 | 1 | 0 | -5.274712 | -10.698686 | 2.545909  |
| 199 | 1 | 0 | -4.131736 | -10.659656 | 3.896267  |
| 200 | 1 | 0 | -4.086848 | -11.994068 | 2.747325  |

-----  
**Table S22.** Cartesian coordinate of *E,R,Z,R,E,R,Z,R* (20)

SCF Done: E(RB3LYP) = -4621.33463794 A.U. after 5 cycles

-----

| Center<br>Number | Atomic<br>Number | Atomic<br>Type | Coordinates (Angstroms) |           |           |
|------------------|------------------|----------------|-------------------------|-----------|-----------|
|                  |                  |                | X                       | Y         | Z         |
| 1                | 6                | 0              | -11.070178              | 2.026077  | -3.316032 |
| 2                | 6                | 0              | -10.491733              | 1.133051  | -2.437146 |
| 3                | 6                | 0              | -9.563183               | 1.556144  | -1.456923 |
| 4                | 6                | 0              | -9.231972               | 2.945532  | -1.391113 |
| 5                | 6                | 0              | -9.846696               | 3.829089  | -2.306618 |
| 6                | 6                | 0              | -10.753060              | 3.400870  | -3.264542 |
| 7                | 6                | 0              | -8.978514               | 0.623053  | -0.508641 |
| 8                | 6                | 0              | -8.269381               | 3.409037  | -0.398447 |
| 9                | 6                | 0              | -7.904464               | 2.507122  | 0.638376  |
| 10               | 6                | 0              | -8.280781               | 1.133915  | 0.557384  |
| 11               | 6                | 0              | -7.006478               | 2.941484  | 1.639867  |
| 12               | 6                | 0              | -6.368627               | 4.155010  | 1.539061  |
| 13               | 6                | 0              | -6.603784               | 5.016478  | 0.434291  |
| 14               | 6                | 0              | -7.605009               | 4.654173  | -0.469556 |
| 15               | 6                | 0              | -11.401727              | 4.369517  | -4.223343 |
| 16               | 6                | 0              | -9.809044               | -2.470519 | 2.519024  |
| 17               | 6                | 0              | -9.700169               | -1.538323 | 1.506978  |
| 18               | 6                | 0              | -8.971317               | -1.812597 | 0.325693  |
| 19               | 6                | 0              | -8.347072               | -3.088707 | 0.197619  |
| 20               | 6                | 0              | -8.476762               | -4.017103 | 1.254876  |
| 21               | 6                | 0              | -9.190479               | -3.735088 | 2.409491  |
| 22               | 6                | 0              | -8.870649               | -0.844200 | -0.755431 |
| 23               | 6                | 0              | -7.598013               | -3.398547 | -1.011755 |
| 24               | 6                | 0              | -7.764535               | -2.544276 | -2.136464 |
| 25               | 6                | 0              | -8.404999               | -1.275884 | -1.973322 |
| 26               | 6                | 0              | -7.110978               | -2.879579 | -3.346781 |
| 27               | 6                | 0              | -6.195182               | -3.907139 | -3.397130 |
| 28               | 6                | 0              | -5.869766               | -4.646623 | -2.230085 |
| 29               | 6                | 0              | -6.629894               | -4.423086 | -1.082386 |
| 30               | 6                | 0              | -9.325451               | -4.748528 | 3.519840  |
| 31               | 6                | 0              | 10.369636               | 2.204092  | 2.346641  |
| 32               | 6                | 0              | 10.168801               | 1.248552  | 1.370593  |
| 33               | 6                | 0              | 9.280688                | 1.467826  | 0.291729  |
| 34               | 6                | 0              | 8.600186                | 2.722375  | 0.221627  |
| 35               | 6                | 0              | 8.825949                | 3.673311  | 1.241887  |
| 36               | 6                | 0              | 9.689623                | 3.440160  | 2.301268  |
| 37               | 6                | 0              | 9.075364                | 0.470042  | -0.748982 |
| 38               | 6                | 0              | 7.705367                | 2.994935  | -0.895732 |
| 39               | 6                | 0              | 7.765535                | 2.119255  | -2.013881 |
| 40               | 6                | 0              | 8.449243                | 0.870935  | -1.904117 |
| 41               | 6                | 0              | 6.977211                | 2.402362  | -3.153928 |
| 42               | 6                | 0              | 6.034890                | 3.403646  | -3.124890 |
| 43               | 6                | 0              | 5.826359                | 4.167912  | -1.947373 |
| 44               | 6                | 0              | 6.711635                | 4.001450  | -0.883738 |
| 45               | 6                | 0              | 9.921714                | 4.478159  | 3.372253  |
| 46               | 6                | 0              | 10.597847               | -2.390200 | -3.762268 |
| 47               | 6                | 0              | 10.301930               | -1.508795 | -2.741356 |
| 48               | 6                | 0              | 9.557432                | -1.912266 | -1.608330 |
| 49               | 6                | 0              | 9.129233                | -3.270961 | -1.533311 |
| 50               | 6                | 0              | 9.442658                | -4.143235 | -2.599308 |
| 51               | 6                | 0              | 10.162188               | -3.731853 | -3.710954 |

-----

|     |   |   |           |            |           |
|-----|---|---|-----------|------------|-----------|
| 52  | 6 | 0 | 9.246422  | -0.992939  | -0.520801 |
| 53  | 6 | 0 | 8.402542  | -3.727480  | -0.357052 |
| 54  | 6 | 0 | 8.423286  | -2.896104  | 0.794817  |
| 55  | 6 | 0 | 8.831809  | -1.531718  | 0.674190  |
| 56  | 6 | 0 | 7.847411  | -3.386632  | 1.991152  |
| 57  | 6 | 0 | 7.120009  | -4.554995  | 2.000173  |
| 58  | 6 | 0 | 6.884436  | -5.276184  | 0.798674  |
| 59  | 6 | 0 | 7.599215  | -4.887451  | -0.335699 |
| 60  | 6 | 0 | 10.496224 | -4.686678  | -4.831156 |
| 61  | 6 | 0 | 0.066805  | -6.011587  | 3.851454  |
| 62  | 6 | 0 | -0.100316 | -6.613612  | 2.622009  |
| 63  | 6 | 0 | 1.006153  | -6.938072  | 1.798494  |
| 64  | 6 | 0 | 2.306156  | -6.566772  | 2.249374  |
| 65  | 6 | 0 | 2.440902  | -5.968387  | 3.523670  |
| 66  | 6 | 0 | 1.353612  | -5.691541  | 4.335584  |
| 67  | 6 | 0 | 0.850915  | -7.593605  | 0.507458  |
| 68  | 6 | 0 | 3.450451  | -6.772556  | 1.374717  |
| 69  | 6 | 0 | 3.286495  | -7.555727  | 0.200683  |
| 70  | 6 | 0 | 1.968441  | -7.952833  | -0.199641 |
| 71  | 6 | 0 | 4.421839  | -7.791483  | -0.613707 |
| 72  | 6 | 0 | 5.626674  | -7.165416  | -0.367127 |
| 73  | 6 | 0 | 5.758799  | -6.242613  | 0.703683  |
| 74  | 6 | 0 | 4.680573  | -6.117453  | 1.578465  |
| 75  | 6 | 0 | 1.523848  | -5.065099  | 5.697938  |
| 76  | 6 | 0 | -2.463807 | -10.255550 | 1.737164  |
| 77  | 6 | 0 | -1.412130 | -9.484187  | 1.288264  |
| 78  | 6 | 0 | -1.613210 | -8.432802  | 0.363133  |
| 79  | 6 | 0 | -2.940114 | -8.170360  | -0.098088 |
| 80  | 6 | 0 | -3.990551 | -8.984786  | 0.383049  |
| 81  | 6 | 0 | -3.780753 | -10.017542 | 1.284278  |
| 82  | 6 | 0 | -0.503325 | -7.642056  | -0.129630 |
| 83  | 6 | 0 | -3.170799 | -7.077773  | -1.036480 |
| 84  | 6 | 0 | -2.035146 | -6.474289  | -1.645816 |
| 85  | 6 | 0 | -0.722898 | -6.780881  | -1.170141 |
| 86  | 6 | 0 | -2.227349 | -5.456887  | -2.606405 |
| 87  | 6 | 0 | -3.481992 | -4.954471  | -2.862152 |
| 88  | 6 | 0 | -4.617082 | -5.443340  | -2.164202 |
| 89  | 6 | 0 | -4.446485 | -6.533471  | -1.311000 |
| 90  | 6 | 0 | -4.919346 | -10.882301 | 1.768466  |
| 91  | 6 | 0 | -0.733158 | 8.034207   | 3.953358  |
| 92  | 6 | 0 | -0.345678 | 8.016713   | 2.629261  |
| 93  | 6 | 0 | -1.288254 | 7.870716   | 1.582195  |
| 94  | 6 | 0 | -2.655003 | 7.655201   | 1.940067  |
| 95  | 6 | 0 | -3.017082 | 7.699660   | 3.305428  |
| 96  | 6 | 0 | -2.090568 | 7.898795   | 4.316258  |
| 97  | 6 | 0 | -0.907053 | 7.892063   | 0.177659  |
| 98  | 6 | 0 | -3.618920 | 7.313038   | 0.902598  |
| 99  | 6 | 0 | -3.250201 | 7.516866   | -0.453935 |
| 100 | 6 | 0 | -1.894861 | 7.841691   | -0.773248 |
| 101 | 6 | 0 | -4.175272 | 7.175023   | -1.469073 |
| 102 | 6 | 0 | -5.326119 | 6.477199   | -1.173438 |
| 103 | 6 | 0 | -5.633051 | 6.112313   | 0.164006  |
| 104 | 6 | 0 | -4.821986 | 6.628552   | 1.175673  |
| 105 | 6 | 0 | -2.505280 | 7.967288   | 5.765727  |
| 106 | 6 | 0 | 2.562824  | 10.653213  | 0.728824  |
| 107 | 6 | 0 | 1.482573  | 9.825182   | 0.507155  |
| 108 | 6 | 0 | 1.644672  | 8.524104   | -0.025859 |
| 109 | 6 | 0 | 2.965883  | 8.080634   | -0.358438 |
| 110 | 6 | 0 | 4.045810  | 8.959989   | -0.112540 |

|     |   |   |            |           |           |
|-----|---|---|------------|-----------|-----------|
| 111 | 6 | 0 | 3.874458   | 10.226836 | 0.423384  |
| 112 | 6 | 0 | 0.503879   | 7.665001  | -0.273677 |
| 113 | 6 | 0 | 3.164151   | 6.765508  | -0.961290 |
| 114 | 6 | 0 | 2.003723   | 6.027876  | -1.325116 |
| 115 | 6 | 0 | 0.710160   | 6.495502  | -0.954935 |
| 116 | 6 | 0 | 2.137795   | 4.788354  | -1.986368 |
| 117 | 6 | 0 | 3.378216   | 4.254539  | -2.231648 |
| 118 | 6 | 0 | 4.554387   | 4.924560  | -1.803622 |
| 119 | 6 | 0 | 4.430366   | 6.171910  | -1.195115 |
| 120 | 6 | 0 | 5.048591   | 11.143970 | 0.665739  |
| 121 | 1 | 0 | -6.753811  | 2.260455  | 2.448165  |
| 122 | 1 | 0 | -5.600869  | 4.404113  | 2.262141  |
| 123 | 1 | 0 | -7.818637  | 5.312833  | -1.303752 |
| 124 | 1 | 0 | -7.851450  | 0.457371  | 1.289329  |
| 125 | 1 | 0 | -10.763699 | 0.083631  | -2.478113 |
| 126 | 1 | 0 | -11.790697 | 1.670136  | -4.048269 |
| 127 | 1 | 0 | -9.626996  | 4.890292  | -2.242111 |
| 128 | 1 | 0 | -11.085444 | 5.397996  | -4.029980 |
| 129 | 1 | 0 | -11.146493 | 4.130653  | -5.262606 |
| 130 | 1 | 0 | -12.494624 | 4.334218  | -4.147182 |
| 131 | 1 | 0 | -5.676386  | -4.118263 | -4.326963 |
| 132 | 1 | 0 | -6.372910  | -4.961414 | -0.176859 |
| 133 | 1 | 0 | -7.292296  | -2.268777 | -4.227343 |
| 134 | 1 | 0 | -8.347673  | -0.577300 | -2.802542 |
| 135 | 1 | 0 | -8.030287  | -5.001007 | 1.147732  |
| 136 | 1 | 0 | -10.195081 | -0.577888 | 1.603492  |
| 137 | 1 | 0 | -10.389988 | -2.234303 | 3.407128  |
| 138 | 1 | 0 | -8.821898  | -5.686340 | 3.270524  |
| 139 | 1 | 0 | -8.891247  | -4.373796 | 4.454286  |
| 140 | 1 | 0 | -10.377716 | -4.976356 | 3.725780  |
| 141 | 1 | 0 | 7.077905   | 1.770138  | -4.032165 |
| 142 | 1 | 0 | 5.400910   | 3.576776  | -3.988921 |
| 143 | 1 | 0 | 6.543575   | 4.571440  | 0.024252  |
| 144 | 1 | 0 | 8.301675   | 0.159341  | -2.709171 |
| 145 | 1 | 0 | 10.717194  | 0.313542  | 1.412990  |
| 146 | 1 | 0 | 11.071385  | 2.008560  | 3.153722  |
| 147 | 1 | 0 | 8.331870   | 4.638056  | 1.178495  |
| 148 | 1 | 0 | 9.350529   | 5.389833  | 3.177925  |
| 149 | 1 | 0 | 9.626953   | 4.102660  | 4.359278  |
| 150 | 1 | 0 | 10.980859  | 4.752795  | 3.438544  |
| 151 | 1 | 0 | 6.672382   | -4.893174 | 2.928494  |
| 152 | 1 | 0 | 7.434214   | -5.415666 | -1.267813 |
| 153 | 1 | 0 | 7.937687   | -2.795196 | 2.898551  |
| 154 | 1 | 0 | 8.622748   | -0.878287 | 1.514730  |
| 155 | 1 | 0 | 9.143541   | -5.184727 | -2.529225 |
| 156 | 1 | 0 | 10.661022  | -0.486456 | -2.793116 |
| 157 | 1 | 0 | 11.186697  | -2.050776 | -4.610845 |
| 158 | 1 | 0 | 11.578854  | -4.753117 | -4.989202 |
| 159 | 1 | 0 | 10.125462  | -5.693899 | -4.623281 |
| 160 | 1 | 0 | 10.054924  | -4.356640 | -5.779060 |
| 161 | 1 | 0 | 4.318567   | -8.442128 | -1.478408 |
| 162 | 1 | 0 | 6.467159   | -7.349895 | -1.028761 |
| 163 | 1 | 0 | 4.741972   | -5.389578 | 2.376231  |
| 164 | 1 | 0 | 1.853483   | -8.461330 | -1.153412 |
| 165 | 1 | 0 | -1.100436  | -6.851192 | 2.283144  |
| 166 | 1 | 0 | -0.805445  | -5.786385 | 4.460148  |
| 167 | 1 | 0 | 3.433678   | -5.733597 | 3.893694  |
| 168 | 1 | 0 | 0.974562   | -4.119238 | 5.771000  |
| 169 | 1 | 0 | 1.138489   | -5.719844 | 6.488429  |

|     |   |   |           |            |           |
|-----|---|---|-----------|------------|-----------|
| 170 | 1 | 0 | 2.575111  | -4.859736  | 5.917011  |
| 171 | 1 | 0 | -3.591091 | -4.110009  | -3.533708 |
| 172 | 1 | 0 | -5.315295 | -6.929096  | -0.795863 |
| 173 | 1 | 0 | -1.356804 | -5.020302  | -3.088653 |
| 174 | 1 | 0 | 0.107616  | -6.204307  | -1.567359 |
| 175 | 1 | 0 | -4.998125 | -8.818389  | 0.014760  |
| 176 | 1 | 0 | -0.403002 | -9.685216  | 1.634305  |
| 177 | 1 | 0 | -2.278059 | -11.064040 | 2.439861  |
| 178 | 1 | 0 | -5.872361 | -10.572836 | 1.331176  |
| 179 | 1 | 0 | -4.757952 | -11.935123 | 1.508913  |
| 180 | 1 | 0 | -5.019047 | -10.834611 | 2.859226  |
| 181 | 1 | 0 | -3.912745 | 7.371290   | -2.505399 |
| 182 | 1 | 0 | -5.944441 | 6.113107   | -1.986844 |
| 183 | 1 | 0 | -5.060177 | 6.394042   | 2.206006  |
| 184 | 1 | 0 | -1.619248 | 7.888056   | -1.823217 |
| 185 | 1 | 0 | 0.702892  | 8.129312   | 2.384359  |
| 186 | 1 | 0 | 0.017877  | 8.161636   | 4.729136  |
| 187 | 1 | 0 | -4.063242 | 7.592046   | 3.575095  |
| 188 | 1 | 0 | -3.576528 | 7.784765   | 5.885962  |
| 189 | 1 | 0 | -1.967784 | 7.226271   | 6.368652  |
| 190 | 1 | 0 | -2.283406 | 8.950778   | 6.196821  |
| 191 | 1 | 0 | 3.464431  | 3.277574   | -2.694509 |
| 192 | 1 | 0 | 5.334281  | 6.685201   | -0.884203 |
| 193 | 1 | 0 | 1.240037  | 4.243619   | -2.265831 |
| 194 | 1 | 0 | -0.135448 | 5.847672   | -1.163406 |
| 195 | 1 | 0 | 5.051183  | 8.646413   | -0.374596 |
| 196 | 1 | 0 | 0.478978  | 10.170882  | 0.734018  |
| 197 | 1 | 0 | 2.404265  | 11.649689  | 1.133571  |
| 198 | 1 | 0 | 5.989096  | 10.683187  | 0.352152  |
| 199 | 1 | 0 | 4.937506  | 12.086537  | 0.117262  |
| 200 | 1 | 0 | 5.139428  | 11.401767  | 1.727579  |

**Table S23.** Cartesian coordinate of  $E,R,Z,R,E,R,Z,S$  (21)

SCF Done: E(RB3LYP) = -4621.33396968 A.U. after 14 cycles

| Center<br>Number | Atomic<br>Number | Atomic<br>Type | Coordinates (Angstroms) |           |           |
|------------------|------------------|----------------|-------------------------|-----------|-----------|
|                  |                  |                | X                       | Y         | Z         |
| 1                | 6                | 0              | -7.758067               | 1.626166  | 2.777165  |
| 2                | 6                | 0              | -7.664865               | 2.398696  | 1.638041  |
| 3                | 6                | 0              | -7.900852               | 1.858558  | 0.348692  |
| 4                | 6                | 0              | -8.147689               | 0.455762  | 0.259011  |
| 5                | 6                | 0              | -8.263405               | -0.299722 | 1.448546  |
| 6                | 6                | 0              | -8.089487               | 0.256521  | 2.704395  |
| 7                | 6                | 0              | -7.857904               | 2.660783  | -0.870041 |
| 8                | 6                | 0              | -8.195160               | -0.179703 | -1.048002 |
| 9                | 6                | 0              | -8.282273               | 0.639558  | -2.205127 |
| 10               | 6                | 0              | -8.150802               | 2.059145  | -2.068775 |
| 11               | 6                | 0              | -8.303662               | 0.017300  | -3.478586 |
| 12               | 6                | 0              | -8.069792               | -1.336316 | -3.615601 |
| 13               | 6                | 0              | -7.827548               | -2.142648 | -2.474835 |
| 14               | 6                | 0              | -7.971303               | -1.561465 | -1.217661 |
| 15               | 6                | 0              | -8.237285               | -0.564883 | 3.961472  |
| 16               | 1                | 0              | -8.427641               | 0.638120  | -4.362277 |
| 17               | 1                | 0              | -8.017780               | -1.779095 | -4.606154 |
| 18               | 1                | 0              | -7.736945               | -2.164447 | -0.348645 |
| 19               | 1                | 0              | -8.147851               | 2.659049  | -2.975028 |
| 20               | 1                | 0              | -7.412037               | 3.444871  | 1.738281  |

|    |   |   |            |           |           |
|----|---|---|------------|-----------|-----------|
| 21 | 1 | 0 | -7.580144  | 2.083363  | 3.747462  |
| 22 | 1 | 0 | -8.512968  | -1.353660 | 1.378528  |
| 23 | 1 | 0 | -7.326114  | -0.527594 | 4.569752  |
| 24 | 1 | 0 | -8.445701  | -1.613586 | 3.733283  |
| 25 | 1 | 0 | -9.054827  | -0.189715 | 4.588518  |
| 26 | 6 | 0 | -9.373296  | 6.229309  | 1.332085  |
| 27 | 6 | 0 | -8.966704  | 5.168843  | 0.548646  |
| 28 | 6 | 0 | -7.678277  | 5.135333  | -0.034522 |
| 29 | 6 | 0 | -6.799307  | 6.238140  | 0.192524  |
| 30 | 6 | 0 | -7.248041  | 7.302761  | 1.006765  |
| 31 | 6 | 0 | -8.510871  | 7.320637  | 1.579244  |
| 32 | 6 | 0 | -7.248730  | 4.027579  | -0.869186 |
| 33 | 6 | 0 | -5.483852  | 6.249180  | -0.434245 |
| 34 | 6 | 0 | -5.238844  | 5.306578  | -1.470930 |
| 35 | 6 | 0 | -6.126789  | 4.198638  | -1.638014 |
| 36 | 6 | 0 | -4.029686  | 5.379461  | -2.198543 |
| 37 | 6 | 0 | -3.027853  | 6.242409  | -1.814151 |
| 38 | 6 | 0 | -3.177202  | 7.046249  | -0.655359 |
| 39 | 6 | 0 | -4.417217  | 7.081120  | -0.021862 |
| 40 | 6 | 0 | -8.972510  | 8.478282  | 2.430858  |
| 41 | 1 | 0 | -2.071427  | 6.230185  | -2.327096 |
| 42 | 1 | 0 | -4.537042  | 7.709246  | 0.855238  |
| 43 | 1 | 0 | -3.869137  | 4.687988  | -3.021452 |
| 44 | 1 | 0 | -5.809393  | 3.397945  | -2.299278 |
| 45 | 1 | 0 | -6.596183  | 8.157310  | 1.160794  |
| 46 | 1 | 0 | -9.643038  | 4.340323  | 0.363394  |
| 47 | 1 | 0 | -10.373652 | 6.231743  | 1.757747  |
| 48 | 1 | 0 | -8.200687  | 9.248034  | 2.513511  |
| 49 | 1 | 0 | -9.227422  | 8.148869  | 3.445052  |
| 50 | 1 | 0 | -9.870773  | 8.947354  | 2.012732  |
| 51 | 6 | 0 | 8.036478   | -6.075739 | -3.804770 |
| 52 | 6 | 0 | 8.138641   | -5.267270 | -2.691079 |
| 53 | 6 | 0 | 7.313022   | -5.461691 | -1.557947 |
| 54 | 6 | 0 | 6.366792   | -6.528217 | -1.588676 |
| 55 | 6 | 0 | 6.286915   | -7.333582 | -2.747217 |
| 56 | 6 | 0 | 7.097077   | -7.128962 | -3.853089 |
| 57 | 6 | 0 | 7.427831   | -4.626897 | -0.370974 |
| 58 | 6 | 0 | 5.518403   | -6.762303 | -0.429683 |
| 59 | 6 | 0 | 5.860735   | -6.115578 | 0.789395  |
| 60 | 6 | 0 | 6.812534   | -5.047861 | 0.781977  |
| 61 | 6 | 0 | 5.110261   | -6.420665 | 1.950463  |
| 62 | 6 | 0 | 3.969365   | -7.187871 | 1.876869  |
| 63 | 6 | 0 | 3.493622   | -7.665673 | 0.626738  |
| 64 | 6 | 0 | 4.319302   | -7.504830 | -0.485208 |
| 65 | 6 | 0 | 7.001412   | -8.009993 | -5.074759 |
| 66 | 1 | 0 | 5.416283   | -5.990932 | 2.900785  |
| 67 | 1 | 0 | 3.398466   | -7.383837 | 2.778634  |
| 68 | 1 | 0 | 3.966823   | -7.848519 | -1.451072 |
| 69 | 1 | 0 | 6.907680   | -4.456178 | 1.687610  |
| 70 | 1 | 0 | 8.876960   | -4.473142 | -2.669524 |
| 71 | 1 | 0 | 8.697196   | -5.909084 | -4.651941 |
| 72 | 1 | 0 | 5.590395   | -8.166151 | -2.760687 |
| 73 | 1 | 0 | 7.965670   | -8.477260 | -5.305617 |
| 74 | 1 | 0 | 6.707156   | -7.432043 | -5.958905 |
| 75 | 1 | 0 | 6.266441   | -8.807767 | -4.938076 |
| 76 | 6 | 0 | 10.274258  | -2.797753 | 2.488636  |
| 77 | 6 | 0 | 9.473862   | -3.384887 | 1.530612  |
| 78 | 6 | 0 | 8.779585   | -2.612270 | 0.569387  |
| 79 | 6 | 0 | 8.935857   | -1.189690 | 0.599748  |

|     |   |   |           |           |           |
|-----|---|---|-----------|-----------|-----------|
| 80  | 6 | 0 | 9.765058  | -0.627435 | 1.597228  |
| 81  | 6 | 0 | 10.430476 | -1.395563 | 2.539739  |
| 82  | 6 | 0 | 7.956551  | -3.233921 | -0.453481 |
| 83  | 6 | 0 | 8.251064  | -0.362604 | -0.388334 |
| 84  | 6 | 0 | 7.599910  | -1.025723 | -1.465732 |
| 85  | 6 | 0 | 7.472953  | -2.444648 | -1.465182 |
| 86  | 6 | 0 | 6.966162  | -0.260256 | -2.469636 |
| 87  | 6 | 0 | 6.894107  | 1.108109  | -2.374432 |
| 88  | 6 | 0 | 7.454785  | 1.792620  | -1.263858 |
| 89  | 6 | 0 | 8.153870  | 1.047064  | -0.314286 |
| 90  | 6 | 0 | 11.313739 | -0.764437 | 3.588471  |
| 91  | 1 | 0 | 6.334233  | 1.664136  | -3.117812 |
| 92  | 1 | 0 | 8.600796  | 1.570023  | 0.524326  |
| 93  | 1 | 0 | 6.481898  | -0.776775 | -3.294021 |
| 94  | 1 | 0 | 6.864062  | -2.889640 | -2.245464 |
| 95  | 1 | 0 | 9.911769  | 0.447678  | 1.615804  |
| 96  | 1 | 0 | 9.383074  | -4.465032 | 1.493358  |
| 97  | 1 | 0 | 10.802465 | -3.422109 | 3.205023  |
| 98  | 1 | 0 | 11.364748 | 0.321206  | 3.469916  |
| 99  | 1 | 0 | 12.336155 | -1.156220 | 3.536775  |
| 100 | 1 | 0 | 10.942780 | -0.973860 | 4.598839  |
| 101 | 6 | 0 | 5.353232  | 6.936060  | 3.997138  |
| 102 | 6 | 0 | 4.764681  | 7.394685  | 2.835663  |
| 103 | 6 | 0 | 5.022583  | 6.787163  | 1.584234  |
| 104 | 6 | 0 | 5.935411  | 5.689143  | 1.543678  |
| 105 | 6 | 0 | 6.512975  | 5.242820  | 2.753522  |
| 106 | 6 | 0 | 6.238492  | 5.837022  | 3.975641  |
| 107 | 6 | 0 | 4.413926  | 7.272411  | 0.352834  |
| 108 | 6 | 0 | 6.267255  | 5.074328  | 0.264924  |
| 109 | 6 | 0 | 5.879225  | 5.762282  | -0.916926 |
| 110 | 6 | 0 | 4.943524  | 6.837797  | -0.837991 |
| 111 | 6 | 0 | 6.291465  | 5.253494  | -2.170873 |
| 112 | 6 | 0 | 6.918692  | 4.032835  | -2.266362 |
| 113 | 6 | 0 | 7.138873  | 3.236360  | -1.111686 |
| 114 | 6 | 0 | 6.866847  | 3.801731  | 0.134497  |
| 115 | 6 | 0 | 6.879282  | 5.347766  | 5.251635  |
| 116 | 1 | 0 | 6.057528  | 5.818863  | -3.069130 |
| 117 | 1 | 0 | 7.205840  | 3.652816  | -3.241281 |
| 118 | 1 | 0 | 7.012421  | 3.195681  | 1.022178  |
| 119 | 1 | 0 | 4.529204  | 7.198788  | -1.773209 |
| 120 | 1 | 0 | 4.103481  | 8.253660  | 2.872403  |
| 121 | 1 | 0 | 5.143654  | 7.436528  | 4.939315  |
| 122 | 1 | 0 | 7.227596  | 4.426114  | 2.723779  |
| 123 | 1 | 0 | 6.123533  | 5.017951  | 5.974151  |
| 124 | 1 | 0 | 7.459336  | 6.141620  | 5.736475  |
| 125 | 1 | 0 | 7.552574  | 4.506865  | 5.065411  |
| 126 | 6 | 0 | 3.395220  | 10.567378 | -2.423332 |
| 127 | 6 | 0 | 3.738263  | 9.669206  | -1.432240 |
| 128 | 6 | 0 | 2.756749  | 8.931123  | -0.730203 |
| 129 | 6 | 0 | 1.385442  | 9.152680  | -1.058627 |
| 130 | 6 | 0 | 1.071543  | 10.072609 | -2.083904 |
| 131 | 6 | 0 | 2.044611  | 10.779329 | -2.774079 |
| 132 | 6 | 0 | 3.106821  | 7.988985  | 0.325761  |
| 133 | 6 | 0 | 0.347688  | 8.446391  | -0.320118 |
| 134 | 6 | 0 | 0.721816  | 7.800537  | 0.890337  |
| 135 | 6 | 0 | 2.105603  | 7.569623  | 1.167468  |
| 136 | 6 | 0 | -0.284720 | 7.223591  | 1.699162  |
| 137 | 6 | 0 | -1.584933 | 7.133126  | 1.251298  |
| 138 | 6 | 0 | -1.930429 | 7.587572  | -0.046388 |

|     |   |   |            |           |           |
|-----|---|---|------------|-----------|-----------|
| 139 | 6 | 0 | -0.978320  | 8.290763  | -0.781008 |
| 140 | 6 | 0 | 1.682392   | 11.767452 | -3.856026 |
| 141 | 1 | 0 | -2.328475  | 6.606629  | 1.841626  |
| 142 | 1 | 0 | -1.245830  | 8.652680  | -1.768729 |
| 143 | 1 | 0 | -0.002665  | 6.774386  | 2.647769  |
| 144 | 1 | 0 | 2.337025   | 6.890209  | 1.980929  |
| 145 | 1 | 0 | 0.028195   | 10.263979 | -2.315480 |
| 146 | 1 | 0 | 4.781357   | 9.536124  | -1.166285 |
| 147 | 1 | 0 | 4.174634   | 11.130232 | -2.931059 |
| 148 | 1 | 0 | 0.599112   | 11.848283 | -3.978862 |
| 149 | 1 | 0 | 2.107679   | 11.471934 | -4.822469 |
| 150 | 1 | 0 | 2.070394   | 12.767153 | -3.628997 |
| 151 | 6 | 0 | -7.000931  | -8.593868 | 1.510730  |
| 152 | 6 | 0 | -5.750311  | -8.340325 | 0.985945  |
| 153 | 6 | 0 | -5.555841  | -7.345133 | -0.000138 |
| 154 | 6 | 0 | -6.684317  | -6.591704 | -0.441683 |
| 155 | 6 | 0 | -7.949252  | -6.878221 | 0.119330  |
| 156 | 6 | 0 | -8.130114  | -7.861785 | 1.080272  |
| 157 | 6 | 0 | -4.246596  | -7.087456 | -0.569098 |
| 158 | 6 | 0 | -6.496427  | -5.549156 | -1.441886 |
| 159 | 6 | 0 | -5.269596  | -5.529338 | -2.162437 |
| 160 | 6 | 0 | -4.163463  | -6.306865 | -1.691278 |
| 161 | 6 | 0 | -5.102951  | -4.589036 | -3.205040 |
| 162 | 6 | 0 | -6.026638  | -3.586530 | -3.406356 |
| 163 | 6 | 0 | -7.155605  | -3.466963 | -2.556193 |
| 164 | 6 | 0 | -7.411575  | -4.493212 | -1.648441 |
| 165 | 6 | 0 | -9.495082  | -8.163432 | 1.649941  |
| 166 | 1 | 0 | -4.186138  | -4.609147 | -3.788340 |
| 167 | 1 | 0 | -5.829107  | -2.811070 | -4.139748 |
| 168 | 1 | 0 | -8.290803  | -4.420006 | -1.016523 |
| 169 | 1 | 0 | -3.193441  | -6.136611 | -2.149898 |
| 170 | 1 | 0 | -4.893142  | -8.916657 | 1.319839  |
| 171 | 1 | 0 | -7.123067  | -9.373612 | 2.258424  |
| 172 | 1 | 0 | -8.818303  | -6.333169 | -0.236801 |
| 173 | 1 | 0 | -9.509204  | -8.033715 | 2.738465  |
| 174 | 1 | 0 | -9.790701  | -9.199766 | 1.448580  |
| 175 | 1 | 0 | -10.260745 | -7.509118 | 1.224693  |
| 176 | 6 | 0 | -3.154725  | -5.537084 | 3.329705  |
| 177 | 6 | 0 | -3.509949  | -6.090357 | 2.117638  |
| 178 | 6 | 0 | -2.599681  | -6.868815 | 1.359326  |
| 179 | 6 | 0 | -1.270931  | -7.006606 | 1.855639  |
| 180 | 6 | 0 | -0.949687  | -6.447123 | 3.114448  |
| 181 | 6 | 0 | -1.862561  | -5.725867 | 3.864905  |
| 182 | 6 | 0 | -2.964677  | -7.487751 | 0.090540  |
| 183 | 6 | 0 | -0.269129  | -7.674041 | 1.039330  |
| 184 | 6 | 0 | -0.682872  | -8.369584 | -0.128769 |
| 185 | 6 | 0 | -2.044462  | -8.263384 | -0.565018 |
| 186 | 6 | 0 | 0.301033   | -9.039862 | -0.897467 |
| 187 | 6 | 0 | 1.645429   | -8.920499 | -0.608038 |
| 188 | 6 | 0 | 2.083904   | -8.106589 | 0.468358  |
| 189 | 6 | 0 | 1.110435   | -7.548237 | 1.293504  |
| 190 | 6 | 0 | -1.499792  | -5.150408 | 5.211848  |
| 191 | 1 | 0 | 2.374956   | -9.425409 | -1.233867 |
| 192 | 1 | 0 | 1.428279   | -6.886259 | 2.088110  |
| 193 | 1 | 0 | -0.016361  | -9.620502 | -1.759958 |
| 194 | 1 | 0 | -2.322295  | -8.740600 | -1.501294 |
| 195 | 1 | 0 | 0.044222   | -6.600686 | 3.521495  |
| 196 | 1 | 0 | -4.511457  | -5.928927 | 1.742306  |
| 197 | 1 | 0 | -3.884146  | -4.952310 | 3.884711  |



|     |   |   |           |           |          |
|-----|---|---|-----------|-----------|----------|
| 198 | 1 | 0 | -0.456690 | -5.354591 | 5.467967 |
| 199 | 1 | 0 | -2.128221 | -5.569877 | 6.006406 |
| 200 | 1 | 0 | -1.643746 | -4.063874 | 5.231155 |

**Table S24.** Cartesian coordinate of  $E,R,Z,R,Z,R,Z,R$  (22)

SCF Done: E(RB3LYP) = -4621.33019141 A.U. after 5 cycles

| Center<br>Number | Atomic<br>Number | Atomic<br>Type | Coordinates (Angstroms) |           |           |
|------------------|------------------|----------------|-------------------------|-----------|-----------|
|                  |                  |                | X                       | Y         | Z         |
| 1                | 6                | 0              | -10.548616              | 1.642662  | -1.974294 |
| 2                | 6                | 0              | -10.130900              | 0.608956  | -1.159144 |
| 3                | 6                | 0              | -9.192176               | 0.816953  | -0.122141 |
| 4                | 6                | 0              | -8.697728               | 2.140668  | 0.082407  |
| 5                | 6                | 0              | -9.140004               | 3.171695  | -0.775700 |
| 6                | 6                | 0              | -10.047895              | 2.950505  | -1.800409 |
| 7                | 6                | 0              | -8.747690               | -0.266628 | 0.746838  |
| 8                | 6                | 0              | -7.773944               | 2.401258  | 1.178357  |
| 9                | 6                | 0              | -7.645229               | 1.399174  | 2.177857  |
| 10               | 6                | 0              | -8.123867               | 0.077770  | 1.922304  |
| 11               | 6                | 0              | -6.861053               | 1.674402  | 3.322490  |
| 12               | 6                | 0              | -6.086082               | 2.809098  | 3.388547  |
| 13               | 6                | 0              | -6.027020               | 3.713931  | 2.295497  |
| 14               | 6                | 0              | -6.929507               | 3.531707  | 1.246984  |
| 15               | 6                | 0              | -10.513288              | 4.072069  | -2.696931 |
| 16               | 1                | 0              | -6.828529               | 0.943016  | 4.125732  |
| 17               | 1                | 0              | -5.466176               | 2.984372  | 4.261690  |
| 18               | 1                | 0              | -6.887147               | 4.207155  | 0.398968  |
| 19               | 1                | 0              | -7.804779               | -0.697945 | 2.609592  |
| 20               | 1                | 0              | -10.544051              | -0.384500 | -1.297811 |
| 21               | 1                | 0              | -11.284070              | 1.450013  | -2.751490 |
| 22               | 1                | 0              | -8.785816               | 4.183695  | -0.603933 |
| 23               | 1                | 0              | -10.241661              | 3.883282  | -3.742286 |
| 24               | 1                | 0              | -11.603388              | 4.182194  | -2.665262 |
| 25               | 1                | 0              | -10.070900              | 5.028266  | -2.405128 |
| 26               | 6                | 0              | -9.316035               | -3.834871 | 3.325571  |
| 27               | 6                | 0              | -9.329473               | -2.762081 | 2.455808  |
| 28               | 6                | 0              | -8.652538               | -2.806978 | 1.215144  |
| 29               | 6                | 0              | -7.965278               | -4.008708 | 0.866419  |
| 30               | 6                | 0              | -7.963852               | -5.082221 | 1.784223  |
| 31               | 6                | 0              | -8.618494               | -5.019078 | 3.005257  |
| 32               | 6                | 0              | -8.663898               | -1.681689 | 0.287243  |
| 33               | 6                | 0              | -7.305887               | -4.107880 | -0.428841 |
| 34               | 6                | 0              | -7.640773               | -3.134811 | -1.408987 |
| 35               | 6                | 0              | -8.299383               | -1.929703 | -1.014667 |
| 36               | 6                | 0              | -7.124557               | -3.280740 | -2.717902 |
| 37               | 6                | 0              | -6.164590               | -4.226756 | -2.993882 |
| 38               | 6                | 0              | -5.643498               | -5.055199 | -1.964656 |
| 39               | 6                | 0              | -6.281606               | -5.034940 | -0.723838 |
| 40               | 6                | 0              | -8.613411               | -6.185078 | 3.963737  |
| 41               | 1                | 0              | -5.754091               | -4.297323 | -3.995893 |
| 42               | 1                | 0              | -5.888135               | -5.653357 | 0.076138  |
| 43               | 1                | 0              | -7.447070               | -2.588225 | -3.490929 |
| 44               | 1                | 0              | -8.323527               | -1.126680 | -1.743033 |
| 45               | 1                | 0              | -7.464573               | -6.006267 | 1.508536  |
| 46               | 1                | 0              | -9.887902               | -1.868604 | 2.714150  |
| 47               | 1                | 0              | -9.861595               | -3.772295 | 4.263916  |
| 48               | 1                | 0              | -9.632379               | -6.519109 | 4.190989  |

|     |   |   |           |           |           |
|-----|---|---|-----------|-----------|-----------|
| 49  | 1 | 0 | -8.064369 | -7.037639 | 3.555235  |
| 50  | 1 | 0 | -8.146522 | -5.912611 | 4.917612  |
| 51  | 6 | 0 | 7.336837  | 1.263562  | 3.718686  |
| 52  | 6 | 0 | 7.777326  | 0.994567  | 2.439645  |
| 53  | 6 | 0 | 7.869511  | 2.009085  | 1.453721  |
| 54  | 6 | 0 | 7.401170  | 3.311484  | 1.801365  |
| 55  | 6 | 0 | 6.983717  | 3.557363  | 3.130001  |
| 56  | 6 | 0 | 6.955093  | 2.568035  | 4.098119  |
| 57  | 6 | 0 | 8.378279  | 1.761149  | 0.109423  |
| 58  | 6 | 0 | 7.294209  | 4.333014  | 0.771142  |
| 59  | 6 | 0 | 7.894268  | 4.095490  | -0.494682 |
| 60  | 6 | 0 | 8.459860  | 2.809594  | -0.772367 |
| 61  | 6 | 0 | 7.769352  | 5.083907  | -1.502786 |
| 62  | 6 | 0 | 6.958932  | 6.187404  | -1.327012 |
| 63  | 6 | 0 | 6.243534  | 6.367594  | -0.116665 |
| 64  | 6 | 0 | 6.482113  | 5.475087  | 0.925467  |
| 65  | 6 | 0 | 6.524266  | 2.859480  | 5.514587  |
| 66  | 1 | 0 | 8.272377  | 4.926801  | -2.453591 |
| 67  | 1 | 0 | 6.832733  | 6.901729  | -2.135460 |
| 68  | 1 | 0 | 5.902129  | 5.585804  | 1.833561  |
| 69  | 1 | 0 | 8.860961  | 2.633099  | -1.766925 |
| 70  | 1 | 0 | 8.065655  | -0.017031 | 2.189274  |
| 71  | 1 | 0 | 7.290289  | 0.458321  | 4.447780  |
| 72  | 1 | 0 | 6.686683  | 4.562820  | 3.410137  |
| 73  | 1 | 0 | 5.690709  | 2.215161  | 5.817229  |
| 74  | 1 | 0 | 7.340711  | 2.679018  | 6.223975  |
| 75  | 1 | 0 | 6.204598  | 3.898503  | 5.631030  |
| 76  | 6 | 0 | 11.308841 | -1.192510 | 1.681213  |
| 77  | 6 | 0 | 10.476259 | -0.251416 | 1.111913  |
| 78  | 6 | 0 | 9.444478  | -0.624032 | 0.218376  |
| 79  | 6 | 0 | 9.285650  | -2.007961 | -0.099432 |
| 80  | 6 | 0 | 10.154189 | -2.943272 | 0.508474  |
| 81  | 6 | 0 | 11.156834 | -2.566296 | 1.388618  |
| 82  | 6 | 0 | 8.574703  | 0.365255  | -0.392135 |
| 83  | 6 | 0 | 8.259161  | -2.414587 | -1.050714 |
| 84  | 6 | 0 | 7.634419  | -1.396006 | -1.822694 |
| 85  | 6 | 0 | 7.795108  | -0.026052 | -1.448795 |
| 86  | 6 | 0 | 6.734489  | -1.760898 | -2.848897 |
| 87  | 6 | 0 | 6.348020  | -3.071243 | -3.013110 |
| 88  | 6 | 0 | 6.815538  | -4.077165 | -2.128203 |
| 89  | 6 | 0 | 7.801779  | -3.744861 | -1.202682 |
| 90  | 6 | 0 | 12.082182 | -3.583827 | 2.010611  |
| 91  | 1 | 0 | 5.596339  | -3.326337 | -3.753226 |
| 92  | 1 | 0 | 8.174530  | -4.519620 | -0.540382 |
| 93  | 1 | 0 | 6.295293  | -0.980083 | -3.464172 |
| 94  | 1 | 0 | 7.165028  | 0.706676  | -1.944267 |
| 95  | 1 | 0 | 10.059042 | -3.993627 | 0.250822  |
| 96  | 1 | 0 | 10.610942 | 0.800891  | 1.340981  |
| 97  | 1 | 0 | 12.099472 | -0.873863 | 2.355987  |
| 98  | 1 | 0 | 12.016791 | -3.564120 | 3.104864  |
| 99  | 1 | 0 | 11.844056 | -4.598169 | 1.679563  |
| 100 | 1 | 0 | 13.127892 | -3.382804 | 1.750140  |
| 101 | 6 | 0 | 2.081274  | -7.235661 | 2.671853  |
| 102 | 6 | 0 | 1.531248  | -7.529583 | 1.441061  |
| 103 | 6 | 0 | 2.287393  | -7.429439 | 0.247538  |
| 104 | 6 | 0 | 3.624488  | -6.937673 | 0.346068  |
| 105 | 6 | 0 | 4.159781  | -6.663179 | 1.625044  |
| 106 | 6 | 0 | 3.423031  | -6.813335 | 2.788538  |
| 107 | 6 | 0 | 1.739574  | -7.763991 | -1.059889 |

|     |   |   |           |            |           |
|-----|---|---|-----------|------------|-----------|
| 108 | 6 | 0 | 4.375931  | -6.660516  | -0.869156 |
| 109 | 6 | 0 | 3.884245  | -7.170358  | -2.100905 |
| 110 | 6 | 0 | 2.573692  | -7.745150  | -2.148652 |
| 111 | 6 | 0 | 4.602849  | -6.896995  | -3.290696 |
| 112 | 6 | 0 | 5.648779  | -5.998158  | -3.295686 |
| 113 | 6 | 0 | 6.044749  | -5.349956  | -2.098746 |
| 114 | 6 | 0 | 5.459864  | -5.755446  | -0.901919 |
| 115 | 6 | 0 | 4.021876  | -6.532471  | 4.144897  |
| 116 | 1 | 0 | 4.260105  | -7.338276  | -4.223114 |
| 117 | 1 | 0 | 6.135213  | -5.735640  | -4.230707 |
| 118 | 1 | 0 | 5.736876  | -5.231527  | 0.006020  |
| 119 | 1 | 0 | 2.176889  | -8.020838  | -3.122040 |
| 120 | 1 | 0 | 0.500459  | -7.855920  | 1.389450  |
| 121 | 1 | 0 | 1.472812  | -7.337501  | 3.567158  |
| 122 | 1 | 0 | 5.193082  | -6.339293  | 1.702260  |
| 123 | 1 | 0 | 3.452890  | -5.762272  | 4.678551  |
| 124 | 1 | 0 | 4.015848  | -7.428671  | 4.776549  |
| 125 | 1 | 0 | 5.056418  | -6.188390  | 4.063203  |
| 126 | 6 | 0 | -1.134652 | -10.837422 | 0.447286  |
| 127 | 6 | 0 | -0.241201 | -9.928799  | -0.080528 |
| 128 | 6 | 0 | -0.681519 | -8.749586  | -0.727109 |
| 129 | 6 | 0 | -2.089985 | -8.515906  | -0.839532 |
| 130 | 6 | 0 | -2.971650 | -9.471961  | -0.285094 |
| 131 | 6 | 0 | -2.527151 | -10.619417 | 0.353533  |
| 132 | 6 | 0 | 0.260863  | -7.809286  | -1.300271 |
| 133 | 6 | 0 | -2.576163 | -7.322605  | -1.526177 |
| 134 | 6 | 0 | -1.621841 | -6.534282  | -2.226982 |
| 135 | 6 | 0 | -0.228904 | -6.800413  | -2.086024 |
| 136 | 6 | 0 | -2.051890 | -5.409585  | -2.962639 |
| 137 | 6 | 0 | -3.364801 | -5.009618  | -2.932334 |
| 138 | 6 | 0 | -4.323818 | -5.712108  | -2.155259 |
| 139 | 6 | 0 | -3.920205 | -6.876543  | -1.500775 |
| 140 | 6 | 0 | -3.495072 | -11.626479 | 0.925829  |
| 141 | 1 | 0 | -3.654263 | -4.096162  | -3.438837 |
| 142 | 1 | 0 | -4.655656 | -7.426681  | -0.923289 |
| 143 | 1 | 0 | -1.314415 | -4.825548  | -3.506584 |
| 144 | 1 | 0 | 0.463713  | -6.099920  | -2.542111 |
| 145 | 1 | 0 | -4.042006 | -9.321231  | -0.383620 |
| 146 | 1 | 0 | 0.826209  | -10.115082 | -0.013429 |
| 147 | 1 | 0 | -0.765198 | -11.737733 | 0.931922  |
| 148 | 1 | 0 | -3.347288 | -11.750971 | 2.005055  |
| 149 | 1 | 0 | -4.532743 | -11.323124 | 0.763181  |
| 150 | 1 | 0 | -3.358973 | -12.613855 | 0.469429  |
| 151 | 6 | 0 | -3.696349 | 10.325538  | -0.921031 |
| 152 | 6 | 0 | -2.514203 | 9.683792   | -0.616857 |
| 153 | 6 | 0 | -2.500237 | 8.458854   | 0.091671  |
| 154 | 6 | 0 | -3.748542 | 7.887875   | 0.498768  |
| 155 | 6 | 0 | -4.937155 | 8.578352   | 0.167781  |
| 156 | 6 | 0 | -4.937743 | 9.777188   | -0.528710 |
| 157 | 6 | 0 | -1.253874 | 7.805111   | 0.434706  |
| 158 | 6 | 0 | -3.763567 | 6.631575   | 1.242696  |
| 159 | 6 | 0 | -2.515404 | 6.116348   | 1.690766  |
| 160 | 6 | 0 | -1.295206 | 6.722428   | 1.270724  |
| 161 | 6 | 0 | -2.485720 | 4.932803   | 2.458770  |
| 162 | 6 | 0 | -3.635647 | 4.224209   | 2.705292  |
| 163 | 6 | 0 | -4.886145 | 4.661275   | 2.193632  |
| 164 | 6 | 0 | -4.931088 | 5.874185   | 1.505518  |
| 165 | 6 | 0 | -6.224044 | 10.496245  | -0.855737 |
| 166 | 1 | 0 | -1.526706 | 4.556502   | 2.804505  |

|     |   |   |           |           |           |
|-----|---|---|-----------|-----------|-----------|
| 167 | 1 | 0 | -3.574490 | 3.277009  | 3.228503  |
| 168 | 1 | 0 | -5.888529 | 6.219800  | 1.130382  |
| 169 | 1 | 0 | -0.367111 | 6.235291  | 1.554069  |
| 170 | 1 | 0 | -1.566109 | 10.122483 | -0.912011 |
| 171 | 1 | 0 | -3.674487 | 11.269758 | -1.459435 |
| 172 | 1 | 0 | -5.890569 | 8.172450  | 0.490702  |
| 173 | 1 | 0 | -7.094131 | 9.956816  | -0.472047 |
| 174 | 1 | 0 | -6.237359 | 11.503939 | -0.424386 |
| 175 | 1 | 0 | -6.351377 | 10.611256 | -1.938645 |
| 176 | 6 | 0 | -0.174353 | 7.442130  | -3.802785 |
| 177 | 6 | 0 | -0.525255 | 7.665332  | -2.487375 |
| 178 | 6 | 0 | 0.452785  | 7.885491  | -1.486944 |
| 179 | 6 | 0 | 1.826854  | 7.800350  | -1.864547 |
| 180 | 6 | 0 | 2.148136  | 7.586296  | -3.224370 |
| 181 | 6 | 0 | 1.179954  | 7.417278  | -4.200756 |
| 182 | 6 | 0 | 0.103000  | 8.150670  | -0.099556 |
| 183 | 6 | 0 | 2.856458  | 7.872291  | -0.838158 |
| 184 | 6 | 0 | 2.488189  | 8.312444  | 0.462068  |
| 185 | 6 | 0 | 1.101352  | 8.460289  | 0.787173  |
| 186 | 6 | 0 | 3.487698  | 8.399387  | 1.461729  |
| 187 | 6 | 0 | 4.754272  | 7.899811  | 1.244708  |
| 188 | 6 | 0 | 5.086491  | 7.292560  | 0.006830  |
| 189 | 6 | 0 | 4.160520  | 7.366288  | -1.031194 |
| 190 | 6 | 0 | 1.547542  | 7.209051  | -5.649582 |
| 191 | 1 | 0 | 5.488786  | 7.917232  | 2.044420  |
| 192 | 1 | 0 | 4.398797  | 6.875731  | -1.968051 |
| 193 | 1 | 0 | 3.220163  | 8.799002  | 2.436608  |
| 194 | 1 | 0 | 0.842665  | 8.682501  | 1.819059  |
| 195 | 1 | 0 | 3.192238  | 7.572729  | -3.521284 |
| 196 | 1 | 0 | -1.573194 | 7.684581  | -2.215276 |
| 197 | 1 | 0 | -0.953164 | 7.289517  | -4.545941 |
| 198 | 1 | 0 | 1.153285  | 8.014462  | -6.280527 |
| 199 | 1 | 0 | 2.631610  | 7.176999  | -5.787730 |
| 200 | 1 | 0 | 1.132072  | 6.270273  | -6.033997 |

**Table S25.** Cartesian coordinate of  $E,R,Z,R,Z,S,Z,S$  (23)

SCF Done: E(RB3LYP) = -4621.32979818 A.U. after 5 cycles

| Center<br>Number | Atomic<br>Number | Atomic<br>Type | Coordinates (Angstroms) |           |           |
|------------------|------------------|----------------|-------------------------|-----------|-----------|
|                  |                  |                | X                       | Y         | Z         |
| 1                | 6                | 0              | -9.656628               | -1.011078 | 3.199759  |
| 2                | 6                | 0              | -9.558609               | -0.170629 | 2.108837  |
| 3                | 6                | 0              | -9.030742               | -0.618194 | 0.875097  |
| 4                | 6                | 0              | -8.612797               | -1.979576 | 0.774662  |
| 5                | 6                | 0              | -8.722101               | -2.808871 | 1.913161  |
| 6                | 6                | 0              | -9.228932               | -2.353886 | 3.120909  |
| 7                | 6                | 0              | -8.936899               | 0.257348  | -0.285116 |
| 8                | 6                | 0              | -8.103999               | -2.482719 | -0.494233 |
| 9                | 6                | 0              | -8.315339               | -1.686652 | -1.652685 |
| 10               | 6                | 0              | -8.717183               | -0.323097 | -1.511123 |
| 11               | 6                | 0              | -7.933877               | -2.202791 | -2.913871 |
| 12               | 6                | 0              | -7.213660               | -3.371637 | -3.010638 |
| 13               | 6                | 0              | -6.809807               | -4.073625 | -1.844570 |
| 14               | 6                | 0              | -7.324715               | -3.653879 | -0.617628 |
| 15               | 6                | 0              | -9.345255               | -3.263543 | 4.319727  |
| 16               | 1                | 0              | -8.164554               | -1.628741 | -3.807443 |
| 17               | 1                | 0              | -6.902284               | -3.730494 | -3.986388 |

|    |   |   |            |           |           |
|----|---|---|------------|-----------|-----------|
| 18 | 1 | 0 | -7.006918  | -4.168317 | 0.282731  |
| 19 | 1 | 0 | -8.668831  | 0.299271  | -2.398393 |
| 20 | 1 | 0 | -9.911208  | 0.852347  | 2.185251  |
| 21 | 1 | 0 | -10.082260 | -0.638611 | 4.128289  |
| 22 | 1 | 0 | -8.432593  | -3.852125 | 1.831819  |
| 23 | 1 | 0 | -10.379213 | -3.319300 | 4.679286  |
| 24 | 1 | 0 | -9.016130  | -4.279448 | 4.085677  |
| 25 | 1 | 0 | -8.735995  | -2.898790 | 5.155156  |
| 26 | 6 | 0 | -10.735384 | 3.214328  | -3.048628 |
| 27 | 6 | 0 | -10.308148 | 2.332853  | -2.075411 |
| 28 | 6 | 0 | -9.239456  | 2.652485  | -1.205599 |
| 29 | 6 | 0 | -8.614307  | 3.927861  | -1.346779 |
| 30 | 6 | 0 | -9.072938  | 4.801658  | -2.357651 |
| 31 | 6 | 0 | -10.114694 | 4.471481  | -3.211234 |
| 32 | 6 | 0 | -8.791372  | 1.736158  | -0.165141 |
| 33 | 6 | 0 | -7.535020  | 4.300996  | -0.442493 |
| 34 | 6 | 0 | -7.354405  | 3.517468  | 0.730516  |
| 35 | 6 | 0 | -7.983185  | 2.236972  | 0.826608  |
| 36 | 6 | 0 | -6.396196  | 3.926778  | 1.687203  |
| 37 | 6 | 0 | -5.528158  | 4.963347  | 1.419717  |
| 38 | 6 | 0 | -5.562350  | 5.622983  | 0.165309  |
| 39 | 6 | 0 | -6.604205  | 5.327507  | -0.712278 |
| 40 | 6 | 0 | -10.595283 | 5.428518  | -4.274912 |
| 41 | 1 | 0 | -4.735209  | 5.202090  | 2.121652  |
| 42 | 1 | 0 | -6.643902  | 5.844778  | -1.665577 |
| 43 | 1 | 0 | -6.293287  | 3.353657  | 2.604903  |
| 44 | 1 | 0 | -7.655326  | 1.587072  | 1.631042  |
| 45 | 1 | 0 | -8.619547  | 5.784143  | -2.447508 |
| 46 | 1 | 0 | -10.811958 | 1.379658  | -1.955875 |
| 47 | 1 | 0 | -11.570713 | 2.943135  | -3.689532 |
| 48 | 1 | 0 | -10.041483 | 6.370676  | -4.246693 |
| 49 | 1 | 0 | -10.476371 | 5.000403  | -5.277303 |
| 50 | 1 | 0 | -11.659441 | 5.660379  | -4.151257 |
| 51 | 6 | 0 | 8.426948   | -1.973573 | 2.713209  |
| 52 | 6 | 0 | 8.538602   | -1.537851 | 1.408996  |
| 53 | 6 | 0 | 8.318839   | -2.405937 | 0.310088  |
| 54 | 6 | 0 | 7.873832   | -3.732572 | 0.598197  |
| 55 | 6 | 0 | 7.799020   | -4.152699 | 1.946003  |
| 56 | 6 | 0 | 8.082359   | -3.309698 | 3.007495  |
| 57 | 6 | 0 | 8.488982   | -1.987004 | -1.077512 |
| 58 | 6 | 0 | 7.422807   | -4.587534 | -0.490450 |
| 59 | 6 | 0 | 7.713211   | -4.196772 | -1.825081 |
| 60 | 6 | 0 | 8.291195   | -2.912210 | -2.072422 |
| 61 | 6 | 0 | 7.250403   | -5.011803 | -2.885904 |
| 62 | 6 | 0 | 6.383487   | -6.059037 | -2.652658 |
| 63 | 6 | 0 | 5.959408   | -6.371403 | -1.334590 |
| 64 | 6 | 0 | 6.569298   | -5.689656 | -0.282229 |
| 65 | 6 | 0 | 8.021708   | -3.789682 | 4.436869  |
| 66 | 1 | 0 | 7.506257   | -4.738971 | -3.906511 |
| 67 | 1 | 0 | 5.949532   | -6.584226 | -3.497024 |
| 68 | 1 | 0 | 6.286939   | -5.943607 | 0.731864  |
| 69 | 1 | 0 | 8.447865   | -2.616956 | -3.106384 |
| 70 | 1 | 0 | 8.809570   | -0.507452 | 1.225210  |
| 71 | 1 | 0 | 8.615491   | -1.277332 | 3.526729  |
| 72 | 1 | 0 | 7.524042   | -5.180517 | 2.161385  |
| 73 | 1 | 0 | 9.011419   | -3.761309 | 4.908347  |
| 74 | 1 | 0 | 7.362464   | -3.156581 | 5.041809  |
| 75 | 1 | 0 | 7.652893   | -4.817011 | 4.499982  |
| 76 | 6 | 0 | 11.778040  | 0.789003  | 0.105115  |

|     |   |   |           |           |           |
|-----|---|---|-----------|-----------|-----------|
| 77  | 6 | 0 | 10.817951 | -0.087813 | -0.356046 |
| 78  | 6 | 0 | 9.623711  | 0.374728  | -0.957717 |
| 79  | 6 | 0 | 9.436307  | 1.784510  | -1.100489 |
| 80  | 6 | 0 | 10.438398 | 2.651493  | -0.607838 |
| 81  | 6 | 0 | 11.598877 | 2.185650  | -0.009287 |
| 82  | 6 | 0 | 8.616715  | -0.545035 | -1.457205 |
| 83  | 6 | 0 | 8.247175  | 2.289710  | -1.774938 |
| 84  | 6 | 0 | 7.451644  | 1.355700  | -2.493983 |
| 85  | 6 | 0 | 7.644787  | -0.043985 | -2.284371 |
| 86  | 6 | 0 | 6.377991  | 1.824243  | -3.284323 |
| 87  | 6 | 0 | 6.005637  | 3.148592  | -3.250984 |
| 88  | 6 | 0 | 6.664529  | 4.058703  | -2.385069 |
| 89  | 6 | 0 | 7.803413  | 3.631840  | -1.707011 |
| 90  | 6 | 0 | 12.661441 | 3.133247  | 0.492162  |
| 91  | 1 | 0 | 5.132833  | 3.482927  | -3.802950 |
| 92  | 1 | 0 | 8.317360  | 4.335809  | -1.060291 |
| 93  | 1 | 0 | 5.804534  | 1.109185  | -3.868268 |
| 94  | 1 | 0 | 6.902539  | -0.718093 | -2.700784 |
| 95  | 1 | 0 | 10.315897 | 3.722513  | -0.736434 |
| 96  | 1 | 0 | 10.975052 | -1.158031 | -0.267487 |
| 97  | 1 | 0 | 12.689821 | 0.401713  | 0.553038  |
| 98  | 1 | 0 | 13.621732 | 2.954338  | -0.005405 |
| 99  | 1 | 0 | 12.383523 | 4.176114  | 0.317941  |
| 100 | 1 | 0 | 12.831325 | 3.006730  | 1.567905  |
| 101 | 6 | 0 | 2.730503  | 6.417036  | 3.427798  |
| 102 | 6 | 0 | 2.045114  | 6.959448  | 2.360544  |
| 103 | 6 | 0 | 2.636936  | 7.080621  | 1.078316  |
| 104 | 6 | 0 | 3.944663  | 6.535293  | 0.901550  |
| 105 | 6 | 0 | 4.627138  | 6.011836  | 2.023786  |
| 106 | 6 | 0 | 4.055802  | 5.954125  | 3.283685  |
| 107 | 6 | 0 | 1.952380  | 7.692405  | -0.055258 |
| 108 | 6 | 0 | 4.511325  | 6.452896  | -0.435674 |
| 109 | 6 | 0 | 3.877888  | 7.164275  | -1.489883 |
| 110 | 6 | 0 | 2.622713  | 7.808962  | -1.246859 |
| 111 | 6 | 0 | 4.403042  | 7.054734  | -2.801290 |
| 112 | 6 | 0 | 5.396936  | 6.143601  | -3.095102 |
| 113 | 6 | 0 | 5.941706  | 5.323462  | -2.075958 |
| 114 | 6 | 0 | 5.546730  | 5.549933  | -0.761134 |
| 115 | 6 | 0 | 4.810811  | 5.407794  | 4.470364  |
| 116 | 1 | 0 | 3.950276  | 7.640651  | -3.597124 |
| 117 | 1 | 0 | 5.728325  | 6.011561  | -4.121125 |
| 118 | 1 | 0 | 5.934493  | 4.890106  | 0.006356  |
| 119 | 1 | 0 | 2.126772  | 8.288438  | -2.086618 |
| 120 | 1 | 0 | 1.032466  | 7.306769  | 2.513300  |
| 121 | 1 | 0 | 2.242921  | 6.352310  | 4.397475  |
| 122 | 1 | 0 | 5.643706  | 5.652658  | 1.898940  |
| 123 | 1 | 0 | 4.942063  | 6.172405  | 5.245274  |
| 124 | 1 | 0 | 4.272214  | 4.573131  | 4.933870  |
| 125 | 1 | 0 | 5.802987  | 5.048906  | 4.183840  |
| 126 | 6 | 0 | -0.186360 | 10.545331 | 2.618571  |
| 127 | 6 | 0 | 0.476317  | 9.742789  | 1.713003  |
| 128 | 6 | 0 | -0.213826 | 8.782804  | 0.935805  |
| 129 | 6 | 0 | -1.629190 | 8.667372  | 1.095214  |
| 130 | 6 | 0 | -2.271871 | 9.502810  | 2.037085  |
| 131 | 6 | 0 | -1.583028 | 10.433832 | 2.799389  |
| 132 | 6 | 0 | 0.477588  | 7.946473  | -0.028364 |
| 133 | 6 | 0 | -2.371628 | 7.718681  | 0.274520  |
| 134 | 6 | 0 | -1.697982 | 7.136566  | -0.834742 |
| 135 | 6 | 0 | -0.277358 | 7.250683  | -0.936557 |

|     |   |   |           |            |           |
|-----|---|---|-----------|------------|-----------|
| 136 | 6 | 0 | -2.420382 | 6.316137   | -1.729987 |
| 137 | 6 | 0 | -3.721856 | 5.956853   | -1.462369 |
| 138 | 6 | 0 | -4.351808 | 6.375492   | -0.262447 |
| 139 | 6 | 0 | -3.689872 | 7.289826   | 0.554705  |
| 140 | 6 | 0 | -2.296248 | 11.325371  | 3.786758  |
| 141 | 1 | 0 | -4.237798 | 5.258462   | -2.113376 |
| 142 | 1 | 0 | -4.179123 | 7.623918   | 1.464124  |
| 143 | 1 | 0 | -1.909127 | 5.910339   | -2.598927 |
| 144 | 1 | 0 | 0.220838  | 6.647356   | -1.689419 |
| 145 | 1 | 0 | -3.350441 | 9.441337   | 2.144852  |
| 146 | 1 | 0 | 1.548540  | 9.846309   | 1.579878  |
| 147 | 1 | 0 | 0.370095  | 11.280901  | 3.194104  |
| 148 | 1 | 0 | -3.370986 | 11.125930  | 3.803798  |
| 149 | 1 | 0 | -1.912102 | 11.179719  | 4.803248  |
| 150 | 1 | 0 | -2.155307 | 12.384456  | 3.541335  |
| 151 | 6 | 0 | -3.571108 | -9.927681  | 1.933804  |
| 152 | 6 | 0 | -2.524629 | -9.371609  | 1.227999  |
| 153 | 6 | 0 | -2.740784 | -8.350869  | 0.272584  |
| 154 | 6 | 0 | -4.076632 | -7.892661  | 0.049644  |
| 155 | 6 | 0 | -5.121818 | -8.489354  | 0.791152  |
| 156 | 6 | 0 | -4.898465 | -9.492559  | 1.721977  |
| 157 | 6 | 0 | -1.642727 | -7.787381  | -0.486960 |
| 158 | 6 | 0 | -4.320443 | -6.832755  | -0.922889 |
| 159 | 6 | 0 | -3.248830 | -6.465269  | -1.783890 |
| 160 | 6 | 0 | -1.931996 | -6.959648  | -1.537564 |
| 161 | 6 | 0 | -3.466447 | -5.488523  | -2.779764 |
| 162 | 6 | 0 | -4.655882 | -4.802738  | -2.847123 |
| 163 | 6 | 0 | -5.696706 | -5.055662  | -1.915280 |
| 164 | 6 | 0 | -5.528845 | -6.102435  | -1.008530 |
| 165 | 6 | 0 | -6.036590 | -10.121984 | 2.488203  |
| 166 | 1 | 0 | -2.650226 | -5.231690  | -3.449678 |
| 167 | 1 | 0 | -4.762839 | -3.993972  | -3.561234 |
| 168 | 1 | 0 | -6.331088 | -6.317960  | -0.310748 |
| 169 | 1 | 0 | -1.119659 | -6.552043  | -2.132120 |
| 170 | 1 | 0 | -1.510381 | -9.722611  | 1.391214  |
| 171 | 1 | 0 | -3.375796 | -10.717810 | 2.654548  |
| 172 | 1 | 0 | -6.144370 | -8.173618  | 0.608884  |
| 173 | 1 | 0 | -6.095990 | -11.200129 | 2.298804  |
| 174 | 1 | 0 | -5.906381 | -9.994942  | 3.569368  |
| 175 | 1 | 0 | -6.998227 | -9.680844  | 2.212726  |
| 176 | 6 | 0 | -0.008224 | -6.152313  | 3.200130  |
| 177 | 6 | 0 | -0.520423 | -6.761553  | 2.073620  |
| 178 | 6 | 0 | 0.324150  | -7.259665  | 1.050855  |
| 179 | 6 | 0 | 1.727943  | -7.053822  | 1.185996  |
| 180 | 6 | 0 | 2.218556  | -6.443204  | 2.363101  |
| 181 | 6 | 0 | 1.383831  | -5.997468  | 3.374479  |
| 182 | 6 | 0 | -0.193859 | -7.927420  | -0.135579 |
| 183 | 6 | 0 | 2.613043  | -7.432010  | 0.094978  |
| 184 | 6 | 0 | 2.099105  | -8.230215  | -0.962173 |
| 185 | 6 | 0 | 0.686542  | -8.463361  | -1.039410 |
| 186 | 6 | 0 | 2.983367  | -8.628447  | -1.994764 |
| 187 | 6 | 0 | 4.272670  | -8.139315  | -2.065950 |
| 188 | 6 | 0 | 4.746654  | -7.203445  | -1.110204 |
| 189 | 6 | 0 | 3.918807  | -6.919451  | -0.024817 |
| 190 | 6 | 0 | 1.931675  | -5.361049  | 4.628314  |
| 191 | 1 | 0 | 4.911371  | -8.441099  | -2.890302 |
| 192 | 1 | 0 | 4.237234  | -6.169468  | 0.687092  |
| 193 | 1 | 0 | 2.613116  | -9.289274  | -2.774488 |
| 194 | 1 | 0 | 0.300393  | -8.981093  | -1.913649 |

|     |   |   |           |           |          |
|-----|---|---|-----------|-----------|----------|
| 195 | 1 | 0 | 3.290607  | -6.335230 | 2.492812 |
| 196 | 1 | 0 | -1.592791 | -6.869091 | 1.974960 |
| 197 | 1 | 0 | -0.687310 | -5.791982 | 3.968935 |
| 198 | 1 | 0 | 3.022961  | -5.300070 | 4.603356 |
| 199 | 1 | 0 | 1.541942  | -4.344963 | 4.760396 |
| 200 | 1 | 0 | 1.647617  | -5.930525 | 5.521115 |

**Table S26.** Cartesian coordinate of *E,R,E,S,Z,R,E,S* (24)

SCF Done: E(RB3LYP) = -4621.32939801 A.U. after 5 cycles

| Center<br>Number | Atomic<br>Number | Atomic<br>Type | Coordinates (Angstroms) |            |           |
|------------------|------------------|----------------|-------------------------|------------|-----------|
|                  |                  |                | X                       | Y          | Z         |
| 1                | 6                | 0              | 7.736609                | -8.461970  | 2.012456  |
| 2                | 6                | 0              | 7.669373                | -7.290995  | 1.286266  |
| 3                | 6                | 0              | 6.519616                | -6.956490  | 0.532958  |
| 4                | 6                | 0              | 5.411078                | -7.859764  | 0.537795  |
| 5                | 6                | 0              | 5.519280                | -9.049568  | 1.293083  |
| 6                | 6                | 0              | 6.653018                | -9.368381  | 2.025284  |
| 7                | 6                | 0              | 6.460916                | -5.739247  | -0.251702 |
| 8                | 6                | 0              | 4.212647                | -7.531764  | -0.226589 |
| 9                | 6                | 0              | 4.294593                | -6.453691  | -1.151018 |
| 10               | 6                | 0              | 5.426060                | -5.583221  | -1.134202 |
| 11               | 6                | 0              | 3.176836                | -6.148617  | -1.957608 |
| 12               | 6                | 0              | 1.974946                | -6.786548  | -1.765530 |
| 13               | 6                | 0              | 1.824391                | -7.770802  | -0.752881 |
| 14               | 6                | 0              | 2.959865                | -8.163403  | -0.043510 |
| 15               | 6                | 0              | 6.745244                | -10.654320 | 2.810500  |
| 16               | 1                | 0              | 3.255715                | -5.340369  | -2.679701 |
| 17               | 1                | 0              | 1.106393                | -6.460017  | -2.325953 |
| 18               | 1                | 0              | 2.859068                | -8.929509  | 0.718014  |
| 19               | 1                | 0              | 5.384124                | -4.690205  | -1.750751 |
| 20               | 1                | 0              | 8.513276                | -6.608061  | 1.274819  |
| 21               | 1                | 0              | 8.637661                | -8.697451  | 2.573330  |
| 22               | 1                | 0              | 4.697658                | -9.759117  | 1.279662  |
| 23               | 1                | 0              | 6.900148                | -10.458307 | 3.878044  |
| 24               | 1                | 0              | 5.835538                | -11.251941 | 2.708704  |
| 25               | 1                | 0              | 7.588956                | -11.267596 | 2.473202  |
| 26               | 6                | 0              | 6.656158                | -3.469423  | 3.470373  |
| 27               | 6                | 0              | 6.689830                | -4.233787  | 2.322422  |
| 28               | 6                | 0              | 7.291520                | -3.757806  | 1.131220  |
| 29               | 6                | 0              | 7.803820                | -2.427471  | 1.130917  |
| 30               | 6                | 0              | 7.769710                | -1.680217  | 2.330508  |
| 31               | 6                | 0              | 7.217731                | -2.175050  | 3.500475  |
| 32               | 6                | 0              | 7.362236                | -4.555043  | -0.086877 |
| 33               | 6                | 0              | 8.299658                | -1.853877  | -0.110555 |
| 34               | 6                | 0              | 8.523907                | -2.711214  | -1.220897 |
| 35               | 6                | 0              | 8.049070                | -4.062685  | -1.166918 |
| 36               | 6                | 0              | 9.048714                | -2.147713  | -2.409960 |
| 37               | 6                | 0              | 9.192397                | -0.782157  | -2.554778 |
| 38               | 6                | 0              | 8.800719                | 0.102289   | -1.516105 |
| 39               | 6                | 0              | 8.421548                | -0.463972  | -0.299732 |
| 40               | 6                | 0              | 7.208462                | -1.365863  | 4.774189  |
| 41               | 1                | 0              | 9.562820                | -0.382932  | -3.493915 |
| 42               | 1                | 0              | 8.070339                | 0.188492   | 0.488870  |
| 43               | 1                | 0              | 9.283076                | -2.806666  | -3.242191 |
| 44               | 1                | 0              | 8.123222                | -4.666163  | -2.067874 |
| 45               | 1                | 0              | 8.209737                | -0.688147  | 2.344911  |



|     |   |   |           |           |           |
|-----|---|---|-----------|-----------|-----------|
| 46  | 1 | 0 | 6.254384  | -5.224193 | 2.338266  |
| 47  | 1 | 0 | 6.195642  | -3.873886 | 4.368404  |
| 48  | 1 | 0 | 7.636467  | -0.371604 | 4.620805  |
| 49  | 1 | 0 | 6.188819  | -1.237397 | 5.155386  |
| 50  | 1 | 0 | 7.784948  | -1.860712 | 5.564827  |
| 51  | 6 | 0 | -8.156011 | 5.418341  | 4.336168  |
| 52  | 6 | 0 | -7.787349 | 5.630770  | 3.022582  |
| 53  | 6 | 0 | -7.720922 | 4.567888  | 2.091544  |
| 54  | 6 | 0 | -8.066787 | 3.257358  | 2.539678  |
| 55  | 6 | 0 | -8.432717 | 3.076070  | 3.892089  |
| 56  | 6 | 0 | -8.479793 | 4.124611  | 4.798212  |
| 57  | 6 | 0 | -7.344612 | 4.783172  | 0.700329  |
| 58  | 6 | 0 | -8.049867 | 2.148289  | 1.595422  |
| 59  | 6 | 0 | -7.984773 | 2.461052  | 0.209707  |
| 60  | 6 | 0 | -7.612096 | 3.779372  | -0.198738 |
| 61  | 6 | 0 | -8.092353 | 1.414301  | -0.735565 |
| 62  | 6 | 0 | -8.088260 | 0.096007  | -0.334072 |
| 63  | 6 | 0 | -7.946881 | -0.236256 | 1.036955  |
| 64  | 6 | 0 | -7.997564 | 0.790344  | 1.978309  |
| 65  | 6 | 0 | -8.884318 | 3.906251  | 6.235843  |
| 66  | 1 | 0 | -8.091335 | 1.661194  | -1.793997 |
| 67  | 1 | 0 | -8.074667 | -0.697559 | -1.074722 |
| 68  | 1 | 0 | -7.907480 | 0.536222  | 3.029603  |
| 69  | 1 | 0 | -7.369551 | 3.918904  | -1.246839 |
| 70  | 1 | 0 | -7.561592 | 6.636227  | 2.684016  |
| 71  | 1 | 0 | -8.212274 | 6.260810  | 5.021121  |
| 72  | 1 | 0 | -8.724760 | 2.085878  | 4.228355  |
| 73  | 1 | 0 | -8.070430 | 4.170431  | 6.921470  |
| 74  | 1 | 0 | -9.744795 | 4.528628  | 6.507196  |
| 75  | 1 | 0 | -9.152597 | 2.863112  | 6.423021  |
| 76  | 6 | 0 | -7.711754 | 7.000465  | -3.115741 |
| 77  | 6 | 0 | -7.676936 | 6.451076  | -1.849449 |
| 78  | 6 | 0 | -6.498235 | 6.467229  | -1.067650 |
| 79  | 6 | 0 | -5.335845 | 7.089435  | -1.614727 |
| 80  | 6 | 0 | -5.405770 | 7.634420  | -2.916386 |
| 81  | 6 | 0 | -6.563944 | 7.599189  | -3.677935 |
| 82  | 6 | 0 | -6.454374 | 5.900891  | 0.274396  |
| 83  | 6 | 0 | -4.119941 | 7.166853  | -0.816410 |
| 84  | 6 | 0 | -4.222754 | 6.888044  | 0.574329  |
| 85  | 6 | 0 | -5.392215 | 6.237340  | 1.078033  |
| 86  | 6 | 0 | -3.090020 | 7.082965  | 1.398794  |
| 87  | 6 | 0 | -1.860294 | 7.382488  | 0.852577  |
| 88  | 6 | 0 | -1.702016 | 7.467858  | -0.553123 |
| 89  | 6 | 0 | -2.839453 | 7.417767  | -1.356007 |
| 90  | 6 | 0 | -6.616411 | 8.201275  | -5.061027 |
| 91  | 1 | 0 | -0.982395 | 7.444515  | 1.488311  |
| 92  | 1 | 0 | -2.719422 | 7.497146  | -2.431770 |
| 93  | 1 | 0 | -3.184343 | 6.913720  | 2.468246  |
| 94  | 1 | 0 | -5.343868 | 5.854575  | 2.091958  |
| 95  | 1 | 0 | -4.532071 | 8.134165  | -3.323343 |
| 96  | 1 | 0 | -8.576084 | 6.013229  | -1.429533 |
| 97  | 1 | 0 | -8.639439 | 6.984844  | -3.682497 |
| 98  | 1 | 0 | -5.661187 | 8.655622  | -5.337098 |
| 99  | 1 | 0 | -6.856958 | 7.442932  | -5.815474 |
| 100 | 1 | 0 | -7.389143 | 8.975712  | -5.129544 |
| 101 | 6 | 0 | 5.492575  | 10.157304 | 0.001526  |
| 102 | 6 | 0 | 5.658248  | 8.855343  | -0.423153 |
| 103 | 6 | 0 | 4.549494  | 8.036773  | -0.743920 |
| 104 | 6 | 0 | 3.238017  | 8.594718  | -0.637501 |

|     |   |   |           |           |           |
|-----|---|---|-----------|-----------|-----------|
| 105 | 6 | 0 | 3.108622  | 9.930299  | -0.191942 |
| 106 | 6 | 0 | 4.202576  | 10.718514 | 0.130108  |
| 107 | 6 | 0 | 4.722114  | 6.671761  | -1.207765 |
| 108 | 6 | 0 | 2.080177  | 7.795904  | -1.020132 |
| 109 | 6 | 0 | 2.317931  | 6.575558  | -1.711186 |
| 110 | 6 | 0 | 3.639662  | 6.035221  | -1.756957 |
| 111 | 6 | 0 | 1.222481  | 5.843695  | -2.221917 |
| 112 | 6 | 0 | -0.070908 | 6.228079  | -1.949417 |
| 113 | 6 | 0 | -0.327990 | 7.344460  | -1.113740 |
| 114 | 6 | 0 | 0.743441  | 8.132545  | -0.701194 |
| 115 | 6 | 0 | 4.035749  | 12.146918 | 0.588571  |
| 116 | 1 | 0 | 1.415501  | 4.933618  | -2.783705 |
| 117 | 1 | 0 | -0.903822 | 5.620253  | -2.288299 |
| 118 | 1 | 0 | 0.541889  | 8.994353  | -0.073107 |
| 119 | 1 | 0 | 3.755811  | 5.026425  | -2.141458 |
| 120 | 1 | 0 | 6.656514  | 8.442217  | -0.525613 |
| 121 | 1 | 0 | 6.365168  | 10.764057 | 0.230404  |
| 122 | 1 | 0 | 2.118698  | 10.371912 | -0.133003 |
| 123 | 1 | 0 | 4.446262  | 12.292091 | 1.594851  |
| 124 | 1 | 0 | 4.563548  | 12.842308 | -0.074375 |
| 125 | 1 | 0 | 2.982891  | 12.440339 | 0.611825  |
| 126 | 6 | 0 | 6.767303  | 5.974522  | 2.630425  |
| 127 | 6 | 0 | 6.159919  | 6.228571  | 1.418298  |
| 128 | 6 | 0 | 6.562810  | 5.570062  | 0.229611  |
| 129 | 6 | 0 | 7.561079  | 4.554402  | 0.342489  |
| 130 | 6 | 0 | 8.180890  | 4.341588  | 1.595395  |
| 131 | 6 | 0 | 7.818550  | 5.038923  | 2.735697  |
| 132 | 6 | 0 | 5.974460  | 5.863803  | -1.071964 |
| 133 | 6 | 0 | 7.855281  | 3.709505  | -0.806558 |
| 134 | 6 | 0 | 7.353106  | 4.095753  | -2.078588 |
| 135 | 6 | 0 | 6.452362  | 5.202284  | -2.175136 |
| 136 | 6 | 0 | 7.617229  | 3.264625  | -3.193255 |
| 137 | 6 | 0 | 8.191906  | 2.021266  | -3.033818 |
| 138 | 6 | 0 | 8.565751  | 1.553136  | -1.747030 |
| 139 | 6 | 0 | 8.475227  | 2.449313  | -0.682570 |
| 140 | 6 | 0 | 8.510150  | 4.809386  | 4.057095  |
| 141 | 1 | 0 | 8.268489  | 1.360315  | -3.890675 |
| 142 | 1 | 0 | 8.793494  | 2.120553  | 0.298974  |
| 143 | 1 | 0 | 7.269714  | 3.577890  | -4.174381 |
| 144 | 1 | 0 | 6.039603  | 5.437573  | -3.152396 |
| 145 | 1 | 0 | 8.983548  | 3.614539  | 1.667957  |
| 146 | 1 | 0 | 5.361000  | 6.956443  | 1.376146  |
| 147 | 1 | 0 | 6.435419  | 6.509691  | 3.516759  |
| 148 | 1 | 0 | 9.267314  | 4.024063  | 3.983330  |
| 149 | 1 | 0 | 9.007421  | 5.720862  | 4.409395  |
| 150 | 1 | 0 | 7.795057  | 4.516006  | 4.834471  |
| 151 | 6 | 0 | -4.917400 | -7.080423 | -3.830730 |
| 152 | 6 | 0 | -5.164452 | -6.876729 | -2.488703 |
| 153 | 6 | 0 | -4.244095 | -7.283777 | -1.490540 |
| 154 | 6 | 0 | -2.999277 | -7.830672 | -1.926837 |
| 155 | 6 | 0 | -2.791380 | -8.049255 | -3.307956 |
| 156 | 6 | 0 | -3.728024 | -7.701679 | -4.266966 |
| 157 | 6 | 0 | -4.500503 | -7.126973 | -0.062296 |
| 158 | 6 | 0 | -1.943851 | -8.067892 | -0.953613 |
| 159 | 6 | 0 | -2.274266 | -8.046901 | 0.427974  |
| 160 | 6 | 0 | -3.576345 | -7.609758 | 0.830566  |
| 161 | 6 | 0 | -1.244663 | -8.266628 | 1.375346  |
| 162 | 6 | 0 | 0.079686  | -8.309759 | 0.990055  |
| 163 | 6 | 0 | 0.440103  | -8.161755 | -0.374206 |

|     |   |   |            |           |           |
|-----|---|---|------------|-----------|-----------|
| 164 | 6 | 0 | -0.584507  | -8.140723 | -1.318536 |
| 165 | 6 | 0 | -3.494397  | -7.966430 | -5.734054 |
| 166 | 1 | 0 | -1.501712  | -8.295088 | 2.431129  |
| 167 | 1 | 0 | 0.855758   | -8.349701 | 1.747993  |
| 168 | 1 | 0 | -0.320090  | -8.059241 | -2.365973 |
| 169 | 1 | 0 | -3.777509  | -7.526277 | 1.895264  |
| 170 | 1 | 0 | -6.090403  | -6.401553 | -2.195734 |
| 171 | 1 | 0 | -5.655725  | -6.763517 | -4.563244 |
| 172 | 1 | 0 | -1.869835  | -8.522846 | -3.631691 |
| 173 | 1 | 0 | -4.235104  | -8.668878 | -6.134413 |
| 174 | 1 | 0 | -3.578047  | -7.045412 | -6.322457 |
| 175 | 1 | 0 | -2.502582  | -8.390336 | -5.912609 |
| 176 | 6 | 0 | -8.886981  | -7.679297 | -0.664980 |
| 177 | 6 | 0 | -7.543124  | -7.561356 | -0.375717 |
| 178 | 6 | 0 | -6.998634  | -6.352864 | 0.118889  |
| 179 | 6 | 0 | -7.877898  | -5.246608 | 0.331398  |
| 180 | 6 | 0 | -9.247032  | -5.403530 | 0.017094  |
| 181 | 6 | 0 | -9.767237  | -6.590738 | -0.475356 |
| 182 | 6 | 0 | -5.588062  | -6.229201 | 0.439106  |
| 183 | 6 | 0 | -7.352351  | -4.005164 | 0.885698  |
| 184 | 6 | 0 | -6.045776  | -4.034797 | 1.447010  |
| 185 | 6 | 0 | -5.189246  | -5.146947 | 1.180246  |
| 186 | 6 | 0 | -5.554349  | -2.891202 | 2.115810  |
| 187 | 6 | 0 | -6.258799  | -1.708697 | 2.098883  |
| 188 | 6 | 0 | -7.475864  | -1.606304 | 1.377707  |
| 189 | 6 | 0 | -8.028613  | -2.764138 | 0.833793  |
| 190 | 6 | 0 | -11.237146 | -6.737275 | -0.785816 |
| 191 | 1 | 0 | -5.831469  | -0.815243 | 2.542699  |
| 192 | 1 | 0 | -8.969190  | -2.689268 | 0.297300  |
| 193 | 1 | 0 | -4.573321  | -2.936084 | 2.581290  |
| 194 | 1 | 0 | -4.145339  | -5.053542 | 1.463867  |
| 195 | 1 | 0 | -9.926554  | -4.577142 | 0.201701  |
| 196 | 1 | 0 | -6.881007  | -8.409437 | -0.519113 |
| 197 | 1 | 0 | -9.277331  | -8.624570 | -1.033780 |
| 198 | 1 | 0 | -11.783803 | -5.812105 | -0.584945 |
| 199 | 1 | 0 | -11.396846 | -6.999356 | -1.838330 |
| 200 | 1 | 0 | -11.693513 | -7.533516 | -0.186184 |

**Table S27.** Cartesian coordinate of *E,R,E,R,E,S,Z,S* (25)

SCF Done: E(RB3LYP) = -4621.32937722 A.U. after 5 cycles

| Center<br>Number | Atomic<br>Number | Atomic<br>Type | Coordinates (Angstroms) |          |           |
|------------------|------------------|----------------|-------------------------|----------|-----------|
|                  |                  |                | X                       | Y        | Z         |
| 1                | 6                | 0              | 4.104769                | 6.641834 | 2.680139  |
| 2                | 6                | 0              | 3.430803                | 7.043232 | 1.545423  |
| 3                | 6                | 0              | 3.966101                | 6.838111 | 0.249010  |
| 4                | 6                | 0              | 5.192536                | 6.114434 | 0.149055  |
| 5                | 6                | 0              | 5.868662                | 5.742252 | 1.333671  |
| 6                | 6                | 0              | 5.360090                | 6.002696 | 2.594952  |
| 7                | 6                | 0              | 3.298819                | 7.295331 | -0.964986 |
| 8                | 6                | 0              | 5.676176                | 5.704733 | -1.160157 |
| 9                | 6                | 0              | 5.079915                | 6.274228 | -2.317120 |
| 10               | 6                | 0              | 3.918534                | 7.099524 | -2.173557 |
| 11               | 6                | 0              | 5.527360                | 5.852236 | -3.593815 |
| 12               | 6                | 0              | 6.389185                | 4.782728 | -3.727573 |
| 13               | 6                | 0              | 6.873289                | 4.104078 | -2.581257 |
| 14               | 6                | 0              | 6.574514                | 4.628927 | -1.327224 |

|    |   |   |           |            |           |
|----|---|---|-----------|------------|-----------|
| 15 | 6 | 0 | 6.108098  | 5.612969   | 3.846132  |
| 16 | 1 | 0 | 5.111983  | 6.328910   | -4.478069 |
| 17 | 1 | 0 | 6.653705  | 4.418320   | -4.716127 |
| 18 | 1 | 0 | 6.909785  | 4.081128   | -0.454180 |
| 19 | 1 | 0 | 3.438885  | 7.464050   | -3.078045 |
| 20 | 1 | 0 | 2.473575  | 7.534484   | 1.653502  |
| 21 | 1 | 0 | 3.664144  | 6.828104   | 3.656501  |
| 22 | 1 | 0 | 6.830503  | 5.245675   | 1.254601  |
| 23 | 1 | 0 | 6.355480  | 6.492557   | 4.452201  |
| 24 | 1 | 0 | 5.506540  | 4.949190   | 4.477973  |
| 25 | 1 | 0 | 7.042224  | 5.095910   | 3.610793  |
| 26 | 6 | 0 | 1.650420  | 10.857471  | 1.137013  |
| 27 | 6 | 0 | 2.165538  | 9.816869   | 0.392067  |
| 28 | 6 | 0 | 1.328167  | 8.814083   | -0.151093 |
| 29 | 6 | 0 | -0.079542 | 8.905819   | 0.074876  |
| 30 | 6 | 0 | -0.569296 | 9.983662   | 0.847368  |
| 31 | 6 | 0 | 0.262464  | 10.955752  | 1.381762  |
| 32 | 6 | 0 | 1.865086  | 7.724628   | -0.945858 |
| 33 | 6 | 0 | -0.969037 | 7.910405   | -0.510172 |
| 34 | 6 | 0 | -0.429787 | 7.039364   | -1.497089 |
| 35 | 6 | 0 | 0.987127  | 6.957328   | -1.666473 |
| 36 | 6 | 0 | -1.290838 | 6.152297   | -2.181753 |
| 37 | 6 | 0 | -2.609611 | 6.020574   | -1.808292 |
| 38 | 6 | 0 | -3.119061 | 6.747400   | -0.702578 |
| 39 | 6 | 0 | -2.310391 | 7.713567   | -0.108053 |
| 40 | 6 | 0 | -0.288348 | 12.105276  | 2.190202  |
| 41 | 1 | 0 | -3.240636 | 5.279471   | -2.288542 |
| 42 | 1 | 0 | -2.707570 | 8.280071   | 0.728125  |
| 43 | 1 | 0 | -0.878679 | 5.520528   | -2.964118 |
| 44 | 1 | 0 | 1.371692  | 6.160187   | -2.295625 |
| 45 | 1 | 0 | -1.639994 | 10.077451  | 1.000457  |
| 46 | 1 | 0 | 3.233400  | 9.759063   | 0.206631  |
| 47 | 1 | 0 | 2.318375  | 11.618286  | 1.533164  |
| 48 | 1 | 0 | -0.040173 | 13.069679  | 1.731863  |
| 49 | 1 | 0 | -1.376320 | 12.047452  | 2.280119  |
| 50 | 1 | 0 | 0.131602  | 12.116136  | 3.202912  |
| 51 | 6 | 0 | -1.230527 | -11.336097 | -1.327707 |
| 52 | 6 | 0 | -1.891788 | -10.212036 | -0.878490 |
| 53 | 6 | 0 | -1.197090 | -9.148482  | -0.255640 |
| 54 | 6 | 0 | 0.220293  | -9.255026  | -0.099121 |
| 55 | 6 | 0 | 0.860710  | -10.423786 | -0.570492 |
| 56 | 6 | 0 | 0.168763  | -11.460951 | -1.177284 |
| 57 | 6 | 0 | -1.897014 | -7.979685  | 0.239183  |
| 58 | 6 | 0 | 0.957942  | -8.166803  | 0.533218  |
| 59 | 6 | 0 | 0.206206  | -7.152896  | 1.189426  |
| 60 | 6 | 0 | -1.210167 | -7.090529  | 1.020626  |
| 61 | 6 | 0 | 0.886095  | -6.117179  | 1.866239  |
| 62 | 6 | 0 | 2.253443  | -6.004276  | 1.789405  |
| 63 | 6 | 0 | 3.020894  | -6.927409  | 1.030692  |
| 64 | 6 | 0 | 2.363494  | -8.019358  | 0.463512  |
| 65 | 6 | 0 | 0.877398  | -12.703597 | -1.659152 |
| 66 | 1 | 0 | 0.304691  | -5.359473  | 2.384701  |
| 67 | 1 | 0 | 2.739407  | -5.142233  | 2.231732  |
| 68 | 1 | 0 | 2.944537  | -8.740292  | -0.101787 |
| 69 | 1 | 0 | -1.729030 | -6.225014  | 1.422120  |
| 70 | 1 | 0 | -2.968944 | -10.133930 | -0.989112 |
| 71 | 1 | 0 | -1.792260 | -12.141896 | -1.793625 |
| 72 | 1 | 0 | 1.931633  | -10.531575 | -0.428992 |
| 73 | 1 | 0 | 0.481878  | -13.602058 | -1.171289 |

|     |   |   |            |            |           |
|-----|---|---|------------|------------|-----------|
| 74  | 1 | 0 | 0.745767   | -12.842830 | -2.738696 |
| 75  | 1 | 0 | 1.950709   | -12.657850 | -1.456439 |
| 76  | 6 | 0 | -2.987718  | -7.003602  | -3.865459 |
| 77  | 6 | 0 | -2.687793  | -7.398151  | -2.578299 |
| 78  | 6 | 0 | -3.574510  | -7.151757  | -1.500863 |
| 79  | 6 | 0 | -4.765333  | -6.416466  | -1.772492 |
| 80  | 6 | 0 | -5.049014  | -6.045025  | -3.107079 |
| 81  | 6 | 0 | -4.193647  | -6.331066  | -4.158116 |
| 82  | 6 | 0 | -3.290555  | -7.584299  | -0.139267 |
| 83  | 6 | 0 | -5.633068  | -6.029528  | -0.670656 |
| 84  | 6 | 0 | -5.416801  | -6.608444  | 0.608505  |
| 85  | 6 | 0 | -4.236250  | -7.388604  | 0.833971  |
| 86  | 6 | 0 | -6.299159  | -6.262590  | 1.661782  |
| 87  | 6 | 0 | -7.257063  | -5.281990  | 1.503916  |
| 88  | 6 | 0 | -7.373476  | -4.572099  | 0.280113  |
| 89  | 6 | 0 | -6.594108  | -5.006716  | -0.791066 |
| 90  | 6 | 0 | -4.527235  | -5.940797  | -5.577129 |
| 91  | 1 | 0 | -7.898424  | -5.024441  | 2.340954  |
| 92  | 1 | 0 | -6.634998  | -4.453808  | -1.720153 |
| 93  | 1 | 0 | -6.178012  | -6.749186  | 2.626286  |
| 94  | 1 | 0 | -4.035115  | -7.731534  | 1.845540  |
| 95  | 1 | 0 | -5.981889  | -5.535113  | -3.324877 |
| 96  | 1 | 0 | -1.756967  | -7.917344  | -2.390824 |
| 97  | 1 | 0 | -2.287359  | -7.220633  | -4.668252 |
| 98  | 1 | 0 | -4.605635  | -6.822259  | -6.224480 |
| 99  | 1 | 0 | -5.476151  | -5.400529  | -5.632418 |
| 100 | 1 | 0 | -3.749365  | -5.298366  | -6.005948 |
| 101 | 6 | 0 | -9.457555  | 1.468582   | 4.461516  |
| 102 | 6 | 0 | -9.267702  | 1.994981   | 3.199630  |
| 103 | 6 | 0 | -9.001665  | 1.166819   | 2.083488  |
| 104 | 6 | 0 | -8.955059  | -0.245149  | 2.289373  |
| 105 | 6 | 0 | -9.147288  | -0.747788  | 3.595986  |
| 106 | 6 | 0 | -9.391103  | 0.076231   | 4.683732  |
| 107 | 6 | 0 | -8.813583  | 1.712452   | 0.745814  |
| 108 | 6 | 0 | -8.741293  | -1.130404  | 1.152779  |
| 109 | 6 | 0 | -8.862485  | -0.575469  | -0.149445 |
| 110 | 6 | 0 | -8.873749  | 0.842931   | -0.316853 |
| 111 | 6 | 0 | -8.798527  | -1.444053  | -1.265144 |
| 112 | 6 | 0 | -8.464048  | -2.770126  | -1.113579 |
| 113 | 6 | 0 | -8.123096  | -3.294119  | 0.162226  |
| 114 | 6 | 0 | -8.337201  | -2.477638  | 1.273831  |
| 115 | 6 | 0 | -9.604540  | -0.487387  | 6.067516  |
| 116 | 1 | 0 | -8.972162  | -1.036444  | -2.257653 |
| 117 | 1 | 0 | -8.410986  | -3.407871  | -1.989407 |
| 118 | 1 | 0 | -8.072084  | -2.850713  | 2.256219  |
| 119 | 1 | 0 | -8.765731  | 1.221603   | -1.327872 |
| 120 | 1 | 0 | -9.343668  | 3.066183   | 3.048445  |
| 121 | 1 | 0 | -9.676151  | 2.133500   | 5.293484  |
| 122 | 1 | 0 | -9.142660  | -1.822316  | 3.750766  |
| 123 | 1 | 0 | -9.566665  | -1.579963  | 6.065683  |
| 124 | 1 | 0 | -8.839187  | -0.127322  | 6.765235  |
| 125 | 1 | 0 | -10.575971 | -0.185337  | 6.475642  |
| 126 | 6 | 0 | -10.171300 | 4.363208   | -2.527502 |
| 127 | 6 | 0 | -9.847367  | 3.623893   | -1.407572 |
| 128 | 6 | 0 | -8.659880  | 3.866266   | -0.677534 |
| 129 | 6 | 0 | -7.803477  | 4.921546   | -1.116005 |
| 130 | 6 | 0 | -8.163897  | 5.652576   | -2.270405 |
| 131 | 6 | 0 | -9.322518  | 5.393323   | -2.986251 |
| 132 | 6 | 0 | -8.316969  | 3.098784   | 0.512329  |

|     |   |   |            |           |           |
|-----|---|---|------------|-----------|-----------|
| 133 | 6 | 0 | -6.599986  | 5.234304  | -0.357081 |
| 134 | 6 | 0 | -6.466674  | 4.661460  | 0.937843  |
| 135 | 6 | 0 | -7.323843  | 3.585972  | 1.326491  |
| 136 | 6 | 0 | -5.375244  | 5.046084  | 1.751040  |
| 137 | 6 | 0 | -4.369406  | 5.845539  | 1.253421  |
| 138 | 6 | 0 | -4.393342  | 6.270761  | -0.098609 |
| 139 | 6 | 0 | -5.529452  | 6.006219  | -0.860393 |
| 140 | 6 | 0 | -9.689567  | 6.197712  | -4.209558 |
| 141 | 1 | 0 | -3.496939  | 6.064617  | 1.861123  |
| 142 | 1 | 0 | -5.552836  | 6.345033  | -1.891113 |
| 143 | 1 | 0 | -5.301453  | 4.639274  | 2.756139  |
| 144 | 1 | 0 | -7.062139  | 3.050701  | 2.233138  |
| 145 | 1 | 0 | -7.530569  | 6.473861  | -2.591185 |
| 146 | 1 | 0 | -10.524959 | 2.851198  | -1.061132 |
| 147 | 1 | 0 | -11.099910 | 4.159553  | -3.055050 |
| 148 | 1 | 0 | -10.667335 | 6.678961  | -4.091620 |
| 149 | 1 | 0 | -8.952963  | 6.980049  | -4.410900 |
| 150 | 1 | 0 | -9.752921  | 5.560427  | -5.099517 |
| 151 | 6 | 0 | 11.819401  | -0.800694 | 0.689258  |
| 152 | 6 | 0 | 10.705175  | -1.561173 | 0.399085  |
| 153 | 6 | 0 | 9.628690   | -1.034606 | -0.352647 |
| 154 | 6 | 0 | 9.723364   | 0.310340  | -0.826023 |
| 155 | 6 | 0 | 10.875948  | 1.061127  | -0.501498 |
| 156 | 6 | 0 | 11.921064  | 0.536036  | 0.243471  |
| 157 | 6 | 0 | 8.459730   | -1.834374 | -0.673601 |
| 158 | 6 | 0 | 8.651877   | 0.861604  | -1.645694 |
| 159 | 6 | 0 | 7.703143   | -0.049860 | -2.185314 |
| 160 | 6 | 0 | 7.619779   | -1.373962 | -1.655121 |
| 161 | 6 | 0 | 6.736726   | 0.421376  | -3.102322 |
| 162 | 6 | 0 | 6.597777   | 1.768773  | -3.346045 |
| 163 | 6 | 0 | 7.395863   | 2.711640  | -2.648174 |
| 164 | 6 | 0 | 8.450371   | 2.244253  | -1.866574 |
| 165 | 6 | 0 | 13.150079  | 1.352972  | 0.560759  |
| 166 | 1 | 0 | 6.048189   | -0.289110 | -3.552083 |
| 167 | 1 | 0 | 5.793481   | 2.124840  | -3.981993 |
| 168 | 1 | 0 | 9.077144   | 2.965827  | -1.351995 |
| 169 | 1 | 0 | 6.759938   | -1.971580 | -1.941887 |
| 170 | 1 | 0 | 10.644871  | -2.588762 | 0.743691  |
| 171 | 1 | 0 | 12.635516  | -1.237499 | 1.259463  |
| 172 | 1 | 0 | 10.965996  | 2.074424  | -0.881192 |
| 173 | 1 | 0 | 13.288599  | 1.458585  | 1.643257  |
| 174 | 1 | 0 | 14.056651  | 0.877814  | 0.168282  |
| 175 | 1 | 0 | 13.086187  | 2.356774  | 0.132452  |
| 176 | 6 | 0 | 7.909273   | -2.007953 | 3.700038  |
| 177 | 6 | 0 | 8.150636   | -1.983165 | 2.341736  |
| 178 | 6 | 0 | 7.726057   | -3.032301 | 1.488266  |
| 179 | 6 | 0 | 6.946138   | -4.076604 | 2.071638  |
| 180 | 6 | 0 | 6.741123   | -4.083967 | 3.470286  |
| 181 | 6 | 0 | 7.219438   | -3.082968 | 4.299025  |
| 182 | 6 | 0 | 8.012884   | -3.062111 | 0.056584  |
| 183 | 6 | 0 | 6.305146   | -5.055564 | 1.207189  |
| 184 | 6 | 0 | 6.724606   | -5.146443 | -0.146827 |
| 185 | 6 | 0 | 7.615159   | -4.156509 | -0.671674 |
| 186 | 6 | 0 | 6.089757   | -6.090336 | -0.991009 |
| 187 | 6 | 0 | 4.963148   | -6.771234 | -0.576459 |
| 188 | 6 | 0 | 4.429233   | -6.562373 | 0.721367  |
| 189 | 6 | 0 | 5.168836   | -5.784802 | 1.610290  |
| 190 | 6 | 0 | 7.009613   | -3.124052 | 5.792716  |
| 191 | 1 | 0 | 4.421541   | -7.389459 | -1.285608 |

|     |   |   |          |           |           |
|-----|---|---|----------|-----------|-----------|
| 192 | 1 | 0 | 4.787578 | -5.642126 | 2.614199  |
| 193 | 1 | 0 | 6.437556 | -6.194272 | -2.015603 |
| 194 | 1 | 0 | 7.856624 | -4.201632 | -1.730289 |
| 195 | 1 | 0 | 6.202114 | -4.913768 | 3.916834  |
| 196 | 1 | 0 | 8.686787 | -1.142225 | 1.925116  |
| 197 | 1 | 0 | 8.264432 | -1.187805 | 4.319236  |
| 198 | 1 | 0 | 6.498685 | -2.221455 | 6.147483  |
| 199 | 1 | 0 | 6.409787 | -3.988388 | 6.090139  |
| 200 | 1 | 0 | 7.965337 | -3.180318 | 6.327256  |

**Table S28.** Cartesian coordinate of  $E,R,E,S,E,S,Z,R$  (26)

SCF Done: E(RB3LYP) = -4621.32883562 A.U. after 5 cycles

| Center<br>Number | Atomic<br>Number | Atomic<br>Type | Coordinates (Angstroms) |            |           |
|------------------|------------------|----------------|-------------------------|------------|-----------|
|                  |                  |                | X                       | Y          | Z         |
| 1                | 6                | 0              | -2.243543               | -10.817038 | -0.455667 |
| 2                | 6                | 0              | -1.159518               | -9.977995  | -0.610429 |
| 3                | 6                | 0              | -1.300497               | -8.689078  | -1.176257 |
| 4                | 6                | 0              | -2.601959               | -8.259850  | -1.586757 |
| 5                | 6                | 0              | -3.686382               | -9.149441  | -1.413134 |
| 6                | 6                | 0              | -3.535137               | -10.412449 | -0.860736 |
| 7                | 6                | 0              | -0.155539               | -7.821044  | -1.366239 |
| 8                | 6                | 0              | -2.773365               | -6.930137  | -2.163206 |
| 9                | 6                | 0              | -1.599018               | -6.213554  | -2.524732 |
| 10               | 6                | 0              | -0.316831               | -6.686734  | -2.115133 |
| 11               | 6                | 0              | -1.722048               | -4.949134  | -3.138838 |
| 12               | 6                | 0              | -2.949703               | -4.346668  | -3.268983 |
| 13               | 6                | 0              | -4.129327               | -4.979287  | -2.793813 |
| 14               | 6                | 0              | -4.023385               | -6.283059  | -2.306350 |
| 15               | 6                | 0              | -4.709595               | -11.347337 | -0.702100 |
| 16               | 1                | 0              | -0.820588               | -4.419696  | -3.435300 |
| 17               | 1                | 0              | -3.000279               | -3.333693  | -3.649990 |
| 18               | 1                | 0              | -4.921658               | -6.785781  | -1.964024 |
| 19               | 1                | 0              | 0.538005                | -6.040514  | -2.290414 |
| 20               | 1                | 0              | -0.169795               | -10.305065 | -0.306557 |
| 21               | 1                | 0              | -2.102832               | -11.806326 | -0.027363 |
| 22               | 1                | 0              | -4.673647               | -8.848330  | -1.749991 |
| 23               | 1                | 0              | -4.553526               | -12.280444 | -1.255875 |
| 24               | 1                | 0              | -4.860506               | -11.621602 | 0.348633  |
| 25               | 1                | 0              | -5.635425               | -10.893734 | -1.065844 |
| 26               | 6                | 0              | 0.326476                | -7.619753  | 2.971247  |
| 27               | 6                | 0              | 0.184347                | -7.801989  | 1.611119  |
| 28               | 6                | 0              | 1.297594                | -7.756326  | 0.736079  |
| 29               | 6                | 0              | 2.571526                | -7.444918  | 1.295759  |
| 30               | 6                | 0              | 2.682739                | -7.281863  | 2.695614  |
| 31               | 6                | 0              | 1.592208                | -7.372807  | 3.544719  |
| 32               | 6                | 0              | 1.177836                | -7.969675  | -0.700254 |
| 33               | 6                | 0              | 3.710957                | -7.251441  | 0.412536  |
| 34               | 6                | 0              | 3.602036                | -7.658993  | -0.943537 |
| 35               | 6                | 0              | 2.316718                | -8.022104  | -1.462820 |
| 36               | 6                | 0              | 4.736297                | -7.515914  | -1.780754 |
| 37               | 6                | 0              | 5.864769                | -6.848319  | -1.351193 |
| 38               | 6                | 0              | 5.914546                | -6.263289  | -0.058149 |
| 39               | 6                | 0              | 4.860275                | -6.541142  | 0.811029  |
| 40               | 6                | 0              | 1.738092                | -7.212763  | 5.038223  |
| 41               | 1                | 0              | 6.701604                | -6.727210  | -2.031707 |
| 42               | 1                | 0              | 4.854607                | -6.077623  | 1.788610  |

|     |   |   |           |           |           |
|-----|---|---|-----------|-----------|-----------|
| 43  | 1 | 0 | 4.684975  | -7.889580 | -2.800298 |
| 44  | 1 | 0 | 2.231547  | -8.206513 | -2.530584 |
| 45  | 1 | 0 | 3.661851  | -7.099972 | 3.127499  |
| 46  | 1 | 0 | -0.800614 | -7.995925 | 1.207149  |
| 47  | 1 | 0 | -0.549916 | -7.674826 | 3.612337  |
| 48  | 1 | 0 | 1.424744  | -8.119646 | 5.568751  |
| 49  | 1 | 0 | 2.773214  | -7.001796 | 5.319829  |
| 50  | 1 | 0 | 1.114351  | -6.392606 | 5.412483  |
| 51  | 6 | 0 | -1.939679 | 7.482334  | -3.880325 |
| 52  | 6 | 0 | -1.404281 | 7.751894  | -2.638075 |
| 53  | 6 | 0 | -2.217055 | 7.839496  | -1.480116 |
| 54  | 6 | 0 | -3.607599 | 7.552732  | -1.624166 |
| 55  | 6 | 0 | -4.125479 | 7.306137  | -2.916631 |
| 56  | 6 | 0 | -3.326315 | 7.278460  | -4.047102 |
| 57  | 6 | 0 | -1.681075 | 8.167704  | -0.164794 |
| 58  | 6 | 0 | -4.443233 | 7.448789  | -0.437876 |
| 59  | 6 | 0 | -3.921882 | 7.894682  | 0.806608  |
| 60  | 6 | 0 | -2.544846 | 8.278024  | 0.894707  |
| 61  | 6 | 0 | -4.730702 | 7.780368  | 1.964310  |
| 62  | 6 | 0 | -5.928268 | 7.095747  | 1.932017  |
| 63  | 6 | 0 | -6.385695 | 6.505058  | 0.727086  |
| 64  | 6 | 0 | -5.677083 | 6.764017  | -0.443001 |
| 65  | 6 | 0 | -3.904872 | 7.031407  | -5.418742 |
| 66  | 1 | 0 | -4.356981 | 8.176592  | 2.905075  |
| 67  | 1 | 0 | -6.499878 | 6.957491  | 2.845196  |
| 68  | 1 | 0 | -6.005309 | 6.280269  | -1.355483 |
| 69  | 1 | 0 | -2.152136 | 8.547160  | 1.871706  |
| 70  | 1 | 0 | -0.337435 | 7.907737  | -2.550465 |
| 71  | 1 | 0 | -1.283321 | 7.433629  | -4.745740 |
| 72  | 1 | 0 | -5.192690 | 7.146821  | -3.033170 |
| 73  | 1 | 0 | -3.736854 | 7.888166  | -6.082016 |
| 74  | 1 | 0 | -3.438058 | 6.162102  | -5.896357 |
| 75  | 1 | 0 | -4.982165 | 6.850554  | -5.373200 |
| 76  | 6 | 0 | 1.271839  | 10.990299 | -1.894216 |
| 77  | 6 | 0 | 0.353432  | 10.170763 | -1.271614 |
| 78  | 6 | 0 | 0.756616  | 9.003566  | -0.580930 |
| 79  | 6 | 0 | 2.148682  | 8.688077  | -0.529272 |
| 80  | 6 | 0 | 3.059156  | 9.550168  | -1.182445 |
| 81  | 6 | 0 | 2.651605  | 10.688286 | -1.861207 |
| 82  | 6 | 0 | -0.206255 | 8.148639  | 0.087921  |
| 83  | 6 | 0 | 2.591576  | 7.508162  | 0.202972  |
| 84  | 6 | 0 | 1.649644  | 6.856670  | 1.047171  |
| 85  | 6 | 0 | 0.262572  | 7.189189  | 0.946370  |
| 86  | 6 | 0 | 2.078199  | 5.783950  | 1.861621  |
| 87  | 6 | 0 | 3.353978  | 5.276971  | 1.749833  |
| 88  | 6 | 0 | 4.254015  | 5.802443  | 0.788879  |
| 89  | 6 | 0 | 3.877230  | 6.935188  | 0.070802  |
| 90  | 6 | 0 | 3.646536  | 11.599955 | -2.537560 |
| 91  | 1 | 0 | 3.645310  | 4.403663  | 2.324959  |
| 92  | 1 | 0 | 4.574150  | 7.344997  | -0.653116 |
| 93  | 1 | 0 | 1.362182  | 5.316496  | 2.532433  |
| 94  | 1 | 0 | -0.445728 | 6.563746  | 1.481790  |
| 95  | 1 | 0 | 4.121699  | 9.335149  | -1.124829 |
| 96  | 1 | 0 | -0.702423 | 10.420618 | -1.298122 |
| 97  | 1 | 0 | 0.932638  | 11.885668 | -2.409197 |
| 98  | 1 | 0 | 3.602573  | 12.614348 | -2.124164 |
| 99  | 1 | 0 | 4.670181  | 11.234686 | -2.419687 |
| 100 | 1 | 0 | 3.442082  | 11.684113 | -3.611376 |
| 101 | 6 | 0 | 9.953642  | 1.719336  | 3.901105  |



|     |   |   |           |           |           |
|-----|---|---|-----------|-----------|-----------|
| 102 | 6 | 0 | 9.720679  | 1.090929  | 2.694324  |
| 103 | 6 | 0 | 8.804870  | 1.613507  | 1.750778  |
| 104 | 6 | 0 | 8.135323  | 2.835290  | 2.066777  |
| 105 | 6 | 0 | 8.393645  | 3.445933  | 3.314870  |
| 106 | 6 | 0 | 9.280648  | 2.913382  | 4.237660  |
| 107 | 6 | 0 | 8.563311  | 0.962385  | 0.470308  |
| 108 | 6 | 0 | 7.229748  | 3.434091  | 1.094857  |
| 109 | 6 | 0 | 7.244168  | 2.916507  | -0.229773 |
| 110 | 6 | 0 | 7.896776  | 1.674015  | -0.496815 |
| 111 | 6 | 0 | 6.472698  | 3.555999  | -1.227786 |
| 112 | 6 | 0 | 5.609239  | 4.580203  | -0.906899 |
| 113 | 6 | 0 | 5.451873  | 4.991257  | 0.440552  |
| 114 | 6 | 0 | 6.296797  | 4.448265  | 1.406209  |
| 115 | 6 | 0 | 9.546420  | 3.594367  | 5.558253  |
| 116 | 1 | 0 | 6.518718  | 3.180204  | -2.246519 |
| 117 | 1 | 0 | 4.966683  | 5.009821  | -1.669087 |
| 118 | 1 | 0 | 6.184561  | 4.774891  | 2.434888  |
| 119 | 1 | 0 | 7.721446  | 1.224226  | -1.468295 |
| 120 | 1 | 0 | 10.264649 | 0.185759  | 2.447585  |
| 121 | 1 | 0 | 10.675519 | 1.297087  | 4.595873  |
| 122 | 1 | 0 | 7.908707  | 4.388392  | 3.549739  |
| 123 | 1 | 0 | 8.968140  | 4.516829  | 5.656731  |
| 124 | 1 | 0 | 9.284707  | 2.943296  | 6.400668  |
| 125 | 1 | 0 | 10.606814 | 3.849081  | 5.669266  |
| 126 | 6 | 0 | 10.152286 | -0.786314 | -3.264134 |
| 127 | 6 | 0 | 9.813844  | -0.261947 | -2.032875 |
| 128 | 6 | 0 | 9.139666  | -1.035195 | -1.058110 |
| 129 | 6 | 0 | 8.832763  | -2.393487 | -1.371976 |
| 130 | 6 | 0 | 9.187421  | -2.894172 | -2.644834 |
| 131 | 6 | 0 | 9.833862  | -2.120789 | -3.596443 |
| 132 | 6 | 0 | 8.788837  | -0.494886 | 0.248821  |
| 133 | 6 | 0 | 8.191039  | -3.234035 | -0.370876 |
| 134 | 6 | 0 | 8.151495  | -2.756835 | 0.966597  |
| 135 | 6 | 0 | 8.432070  | -1.382179 | 1.236002  |
| 136 | 6 | 0 | 7.664585  | -3.619191 | 1.977991  |
| 137 | 6 | 0 | 7.082792  | -4.825824 | 1.662607  |
| 138 | 6 | 0 | 6.906160  | -5.217720 | 0.308138  |
| 139 | 6 | 0 | 7.530482  | -4.444478 | -0.672106 |
| 140 | 6 | 0 | 10.213963 | -2.683601 | -4.944313 |
| 141 | 1 | 0 | 6.705212  | -5.456083 | 2.460557  |
| 142 | 1 | 0 | 7.402038  | -4.714286 | -1.713761 |
| 143 | 1 | 0 | 7.710448  | -3.291814 | 3.013430  |
| 144 | 1 | 0 | 8.193330  | -1.014072 | 2.228404  |
| 145 | 1 | 0 | 8.981700  | -3.935074 | -2.874737 |
| 146 | 1 | 0 | 10.085603 | 0.760100  | -1.792648 |
| 147 | 1 | 0 | 10.684275 | -0.168176 | -3.983136 |
| 148 | 1 | 0 | 11.295017 | -2.617750 | -5.113578 |
| 149 | 1 | 0 | 9.923780  | -3.733568 | -5.036952 |
| 150 | 1 | 0 | 9.729505  | -2.129486 | -5.756928 |
| 151 | 6 | 0 | -9.859321 | -3.504316 | 2.062715  |
| 152 | 6 | 0 | -9.516496 | -2.274742 | 1.538431  |
| 153 | 6 | 0 | -8.600319 | -2.161210 | 0.466886  |
| 154 | 6 | 0 | -8.039694 | -3.356053 | -0.078189 |
| 155 | 6 | 0 | -8.405121 | -4.596261 | 0.491674  |
| 156 | 6 | 0 | -9.300155 | -4.694659 | 1.546423  |
| 157 | 6 | 0 | -8.242605 | -0.871925 | -0.098176 |
| 158 | 6 | 0 | -7.133980 | -3.267881 | -1.215682 |
| 159 | 6 | 0 | -7.091578 | -2.038539 | -1.927598 |
| 160 | 6 | 0 | -7.629764 | -0.859503 | -1.325730 |

|     |   |   |            |           |           |
|-----|---|---|------------|-----------|-----------|
| 161 | 6 | 0 | -6.344170  | -1.970234 | -3.125865 |
| 162 | 6 | 0 | -5.513919  | -3.002251 | -3.496811 |
| 163 | 6 | 0 | -5.348605  | -4.138380 | -2.659610 |
| 164 | 6 | 0 | -6.223493  | -4.284705 | -1.581951 |
| 165 | 6 | 0 | -9.692556  | -6.032982 | 2.123774  |
| 166 | 1 | 0 | -6.385710  | -1.061758 | -3.720962 |
| 167 | 1 | 0 | -4.928018  | -2.914843 | -4.405577 |
| 168 | 1 | 0 | -6.108675  | -5.141132 | -0.926176 |
| 169 | 1 | 0 | -7.391437  | 0.092076  | -1.791292 |
| 170 | 1 | 0 | -9.957427  | -1.369327 | 1.943557  |
| 171 | 1 | 0 | -10.576111 | -3.560586 | 2.878174  |
| 172 | 1 | 0 | -8.001968  | -5.509077 | 0.063103  |
| 173 | 1 | 0 | -9.450997  | -6.091760 | 3.191512  |
| 174 | 1 | 0 | -10.771085 | -6.206110 | 2.030698  |
| 175 | 1 | 0 | -9.177104  | -6.854179 | 1.618657  |
| 176 | 6 | 0 | -6.574931  | -0.143659 | 3.909015  |
| 177 | 6 | 0 | -7.158024  | -0.383510 | 2.681862  |
| 178 | 6 | 0 | -7.685611  | 0.665563  | 1.887069  |
| 179 | 6 | 0 | -7.500850  | 1.999856  | 2.358933  |
| 180 | 6 | 0 | -6.926477  | 2.206882  | 3.634069  |
| 181 | 6 | 0 | -6.474909  | 1.165099  | 4.426146  |
| 182 | 6 | 0 | -8.356554  | 0.441605  | 0.608833  |
| 183 | 6 | 0 | -7.823954  | 3.117420  | 1.486877  |
| 184 | 6 | 0 | -8.588476  | 2.872514  | 0.315317  |
| 185 | 6 | 0 | -8.875309  | 1.521401  | -0.062772 |
| 186 | 6 | 0 | -8.874789  | 3.959746  | -0.548154 |
| 187 | 6 | 0 | -8.279016  | 5.191737  | -0.365154 |
| 188 | 6 | 0 | -7.385071  | 5.403840  | 0.714398  |
| 189 | 6 | 0 | -7.245672  | 4.391624  | 1.659954  |
| 190 | 6 | 0 | -5.884443  | 1.407996  | 5.793256  |
| 191 | 1 | 0 | -8.450448  | 5.989388  | -1.082290 |
| 192 | 1 | 0 | -6.531583  | 4.536873  | 2.461829  |
| 193 | 1 | 0 | -9.509957  | 3.788097  | -1.413562 |
| 194 | 1 | 0 | -9.402263  | 1.356831  | -0.999012 |
| 195 | 1 | 0 | -6.847692  | 3.220210  | 4.014904  |
| 196 | 1 | 0 | -7.216135  | -1.402408 | 2.326775  |
| 197 | 1 | 0 | -6.192899  | -0.979743 | 4.489634  |
| 198 | 1 | 0 | -4.878160  | 0.980844  | 5.872951  |
| 199 | 1 | 0 | -5.814518  | 2.476101  | 6.015992  |
| 200 | 1 | 0 | -6.492029  | 0.941834  | 6.578101  |

**Table S29.** Cartesian coordinate of  $E,R,Z,R,E,S,Z,S$  (27)

SCF Done: E(RB3LYP) = -4621.32875230 A.U. after 6 cycles

| Center<br>Number | Atomic<br>Number | Atomic<br>Type | Coordinates (Angstroms) |          |           |
|------------------|------------------|----------------|-------------------------|----------|-----------|
|                  |                  |                | X                       | Y        | Z         |
| 1                | 6                | 0              | 2.061373                | 6.621548 | 3.045785  |
| 2                | 6                | 0              | 1.373590                | 6.958881 | 1.898686  |
| 3                | 6                | 0              | 2.008374                | 6.990819 | 0.631836  |
| 4                | 6                | 0              | 3.372460                | 6.575384 | 0.564898  |
| 5                | 6                | 0              | 4.052412                | 6.261378 | 1.764221  |
| 6                | 6                | 0              | 3.432206                | 6.288693 | 3.001914  |
| 7                | 6                | 0              | 1.315147                | 7.386789 | -0.588194 |
| 8                | 6                | 0              | 4.008385                | 6.411169 | -0.733117 |
| 9                | 6                | 0              | 3.350903                | 6.921259 | -1.884917 |
| 10               | 6                | 0              | 2.020094                | 7.435742 | -1.763897 |
| 11               | 6                | 0              | 3.955682                | 6.740078 | -3.153297 |

|    |   |   |           |           |           |
|----|---|---|-----------|-----------|-----------|
| 12 | 6 | 0 | 5.070180  | 5.940535  | -3.302773 |
| 13 | 6 | 0 | 5.653477  | 5.304801  | -2.178115 |
| 14 | 6 | 0 | 5.158563  | 5.613354  | -0.914371 |
| 15 | 6 | 0 | 4.183748  | 5.966680  | 4.270184  |
| 16 | 1 | 0 | 3.480012  | 7.178030  | -4.027127 |
| 17 | 1 | 0 | 5.474804  | 5.752432  | -4.293120 |
| 18 | 1 | 0 | 5.577951  | 5.090260  | -0.062928 |
| 19 | 1 | 0 | 1.513615  | 7.755345  | -2.670772 |
| 20 | 1 | 0 | 0.324838  | 7.212757  | 1.972958  |
| 21 | 1 | 0 | 1.539921  | 6.619034  | 3.999837  |
| 22 | 1 | 0 | 5.105184  | 6.001576  | 1.718662  |
| 23 | 1 | 0 | 3.708473  | 5.142819  | 4.815065  |
| 24 | 1 | 0 | 5.217477  | 5.678461  | 4.061547  |
| 25 | 1 | 0 | 4.206430  | 6.827353  | 4.949224  |
| 26 | 6 | 0 | -1.151809 | 10.375167 | 1.593180  |
| 27 | 6 | 0 | -0.391129 | 9.509001  | 0.835481  |
| 28 | 6 | 0 | -0.971392 | 8.394543  | 0.184828  |
| 29 | 6 | 0 | -2.378189 | 8.183624  | 0.318306  |
| 30 | 6 | 0 | -3.123238 | 9.090295  | 1.106393  |
| 31 | 6 | 0 | -2.542253 | 10.175713 | 1.744091  |
| 32 | 6 | 0 | -0.177115 | 7.493316  | -0.629444 |
| 33 | 6 | 0 | -3.007231 | 7.064638  | -0.372413 |
| 34 | 6 | 0 | -2.242224 | 6.378730  | -1.356445 |
| 35 | 6 | 0 | -0.833341 | 6.603816  | -1.439317 |
| 36 | 6 | 0 | -2.857679 | 5.370463  | -2.131889 |
| 37 | 6 | 0 | -4.139017 | 4.950471  | -1.854715 |
| 38 | 6 | 0 | -4.856599 | 5.501178  | -0.762382 |
| 39 | 6 | 0 | -4.301968 | 6.579633  | -0.076052 |
| 40 | 6 | 0 | -3.364485 | 11.137570 | 2.566950  |
| 41 | 1 | 0 | -4.569018 | 4.119328  | -2.404321 |
| 42 | 1 | 0 | -4.859325 | 7.011223  | 0.749063  |
| 43 | 1 | 0 | -2.277629 | 4.878570  | -2.908222 |
| 44 | 1 | 0 | -0.256293 | 5.946358  | -2.082784 |
| 45 | 1 | 0 | -4.197287 | 8.956092  | 1.189331  |
| 46 | 1 | 0 | 0.674451  | 9.680901  | 0.721266  |
| 47 | 1 | 0 | -0.678958 | 11.228873 | 2.072265  |
| 48 | 1 | 0 | -4.422304 | 10.861616 | 2.568108  |
| 49 | 1 | 0 | -3.023286 | 11.161822 | 3.608647  |
| 50 | 1 | 0 | -3.284778 | 12.160632 | 2.181413  |
| 51 | 6 | 0 | 0.152981  | -6.295746 | -3.915457 |
| 52 | 6 | 0 | -0.179687 | -6.665792 | -2.628983 |
| 53 | 6 | 0 | 0.801645  | -7.094837 | -1.700331 |
| 54 | 6 | 0 | 2.165874  | -7.061170 | -2.117130 |
| 55 | 6 | 0 | 2.467700  | -6.699517 | -3.449960 |
| 56 | 6 | 0 | 1.492044  | -6.328437 | -4.360031 |
| 57 | 6 | 0 | 0.469273  | -7.547371 | -0.354440 |
| 58 | 6 | 0 | 3.213842  | -7.337066 | -1.147531 |
| 59 | 6 | 0 | 2.855712  | -7.902034 | 0.106321  |
| 60 | 6 | 0 | 1.469342  | -8.030563 | 0.448430  |
| 61 | 6 | 0 | 3.877050  | -8.148604 | 1.057503  |
| 62 | 6 | 0 | 5.167185  | -7.702056 | 0.851920  |
| 63 | 6 | 0 | 5.505029  | -7.005086 | -0.335034 |
| 64 | 6 | 0 | 4.544073  | -6.909429 | -1.337709 |
| 65 | 6 | 0 | 1.835522  | -5.964218 | -5.783575 |
| 66 | 1 | 0 | 3.613394  | -8.631522 | 1.995092  |
| 67 | 1 | 0 | 5.918423  | -7.837511 | 1.624663  |
| 68 | 1 | 0 | 4.789341  | -6.340597 | -2.226716 |
| 69 | 1 | 0 | 1.223245  | -8.403785 | 1.439073  |
| 70 | 1 | 0 | -1.217069 | -6.629668 | -2.322725 |

|     |   |   |            |           |           |
|-----|---|---|------------|-----------|-----------|
| 71  | 1 | 0 | -0.630397  | -5.979890 | -4.600104 |
| 72  | 1 | 0 | 3.500676   | -6.729661 | -3.781582 |
| 73  | 1 | 0 | 1.377315   | -6.661901 | -6.494688 |
| 74  | 1 | 0 | 1.467643   | -4.963298 | -6.036955 |
| 75  | 1 | 0 | 2.915682   | -5.977588 | -5.951939 |
| 76  | 6 | 0 | -0.300825  | -4.829281 | 2.945321  |
| 77  | 6 | 0 | -0.070380  | -5.718434 | 1.916461  |
| 78  | 6 | 0 | -1.134944  | -6.347543 | 1.222860  |
| 79  | 6 | 0 | -2.466008  | -5.973444 | 1.575148  |
| 80  | 6 | 0 | -2.664804  | -5.078213 | 2.651301  |
| 81  | 6 | 0 | -1.614118  | -4.507791 | 3.349872  |
| 82  | 6 | 0 | -0.916449  | -7.335309 | 0.172020  |
| 83  | 6 | 0 | -3.579768  | -6.472381 | 0.784655  |
| 84  | 6 | 0 | -3.344952  | -7.517416 | -0.149623 |
| 85  | 6 | 0 | -2.000753  | -7.950691 | -0.396691 |
| 86  | 6 | 0 | -4.427608  | -7.982753 | -0.936901 |
| 87  | 6 | 0 | -5.652098  | -7.345288 | -0.917098 |
| 88  | 6 | 0 | -5.862423  | -6.220070 | -0.081235 |
| 89  | 6 | 0 | -4.846222  | -5.852126 | 0.795772  |
| 90  | 6 | 0 | -1.851005  | -3.564773 | 4.503770  |
| 91  | 1 | 0 | -6.447859  | -7.678677 | -1.577032 |
| 92  | 1 | 0 | -4.991246  | -4.961881 | 1.395932  |
| 93  | 1 | 0 | -4.259797  | -8.813955 | -1.617102 |
| 94  | 1 | 0 | -1.843482  | -8.713972 | -1.154197 |
| 95  | 1 | 0 | -3.678277  | -4.838011 | 2.955778  |
| 96  | 1 | 0 | 0.949980   | -5.942489 | 1.634163  |
| 97  | 1 | 0 | 0.543493   | -4.373227 | 3.456443  |
| 98  | 1 | 0 | -2.918058  | -3.398175 | 4.673593  |
| 99  | 1 | 0 | -1.420434  | -3.956394 | 5.432951  |
| 100 | 1 | 0 | -1.383749  | -2.590029 | 4.321534  |
| 101 | 6 | 0 | -10.271730 | -1.276274 | 3.740477  |
| 102 | 6 | 0 | -10.070481 | -0.678690 | 2.512291  |
| 103 | 6 | 0 | -9.437678  | -1.365985 | 1.449903  |
| 104 | 6 | 0 | -9.017891  | -2.712133 | 1.672768  |
| 105 | 6 | 0 | -9.235425  | -3.289383 | 2.943888  |
| 106 | 6 | 0 | -9.848434  | -2.601334 | 3.979914  |
| 107 | 6 | 0 | -9.239334  | -0.750453 | 0.144994  |
| 108 | 6 | 0 | -8.390453  | -3.456694 | 0.589218  |
| 109 | 6 | 0 | -8.490143  | -2.922840 | -0.725208 |
| 110 | 6 | 0 | -8.904389  | -1.567095 | -0.907501 |
| 111 | 6 | 0 | -7.991195  | -3.678742 | -1.811880 |
| 112 | 6 | 0 | -7.270178  | -4.833200 | -1.598366 |
| 113 | 6 | 0 | -6.991536  | -5.272950 | -0.279409 |
| 114 | 6 | 0 | -7.614208  | -4.620037 | 0.782974  |
| 115 | 6 | 0 | -10.082242 | -3.246444 | 5.324340  |
| 116 | 1 | 0 | -8.111445  | -3.290401 | -2.819812 |
| 117 | 1 | 0 | -6.813757  | -5.349187 | -2.437365 |
| 118 | 1 | 0 | -7.422568  | -4.972134 | 1.791343  |
| 119 | 1 | 0 | -8.776526  | -1.141256 | -1.897265 |
| 120 | 1 | 0 | -10.420741 | 0.333979  | 2.343698  |
| 121 | 1 | 0 | -10.776481 | -0.724753 | 4.529861  |
| 122 | 1 | 0 | -8.946764  | -4.323168 | 3.107552  |
| 123 | 1 | 0 | -9.556055  | -2.707021 | 6.120823  |
| 124 | 1 | 0 | -11.146333 | -3.245039 | 5.587395  |
| 125 | 1 | 0 | -9.735243  | -4.283045 | 5.337297  |
| 126 | 6 | 0 | -10.877641 | 1.516766  | -3.284661 |
| 127 | 6 | 0 | -10.500843 | 0.864934  | -2.127407 |
| 128 | 6 | 0 | -9.510626  | 1.396315  | -1.268137 |
| 129 | 6 | 0 | -8.912321  | 2.643993  | -1.619038 |

|     |   |   |            |           |           |
|-----|---|---|------------|-----------|-----------|
| 130 | 6 | 0 | -9.318781  | 3.280044  | -2.813375 |
| 131 | 6 | 0 | -10.282586 | 2.742605  | -3.652919 |
| 132 | 6 | 0 | -9.119260  | 0.724713  | -0.036410 |
| 133 | 6 | 0 | -7.913839  | 3.233919  | -0.737435 |
| 134 | 6 | 0 | -7.787816  | 2.697991  | 0.573994  |
| 135 | 6 | 0 | -8.390256  | 1.438931  | 0.882857  |
| 136 | 6 | 0 | -6.908956  | 3.323447  | 1.489050  |
| 137 | 6 | 0 | -6.064996  | 4.334033  | 1.081969  |
| 138 | 6 | 0 | -6.044013  | 4.750407  | -0.272928 |
| 139 | 6 | 0 | -7.008419  | 4.239515  | -1.139827 |
| 140 | 6 | 0 | -10.706903 | 3.447722  | -4.918191 |
| 141 | 1 | 0 | -5.331645  | 4.739780  | 1.771919  |
| 142 | 1 | 0 | -7.004969  | 4.570992  | -2.173178 |
| 143 | 1 | 0 | -6.847482  | 2.938404  | 2.503521  |
| 144 | 1 | 0 | -8.107354  | 0.973390  | 1.821216  |
| 145 | 1 | 0 | -8.888355  | 4.243808  | -3.067735 |
| 146 | 1 | 0 | -10.984366 | -0.066373 | -1.852930 |
| 147 | 1 | 0 | -11.653808 | 1.088520  | -3.914109 |
| 148 | 1 | 0 | -10.197641 | 4.408365  | -5.031701 |
| 149 | 1 | 0 | -10.481464 | 2.842729  | -5.804487 |
| 150 | 1 | 0 | -11.786600 | 3.636228  | -4.926861 |
| 151 | 6 | 0 | 11.559265  | 1.674294  | 1.139353  |
| 152 | 6 | 0 | 10.774096  | 0.661410  | 0.628412  |
| 153 | 6 | 0 | 9.657133   | 0.938580  | -0.194467 |
| 154 | 6 | 0 | 9.358114   | 2.301804  | -0.500532 |
| 155 | 6 | 0 | 10.181643  | 3.312106  | 0.046218  |
| 156 | 6 | 0 | 11.270740  | 3.028021  | 0.856085  |
| 157 | 6 | 0 | 8.838526   | -0.124433 | -0.748480 |
| 158 | 6 | 0 | 8.235510   | 2.612470  | -1.376549 |
| 159 | 6 | 0 | 7.658098   | 1.542267  | -2.114236 |
| 160 | 6 | 0 | 7.965912   | 0.193231  | -1.756869 |
| 161 | 6 | 0 | 6.656914   | 1.823958  | -3.070984 |
| 162 | 6 | 0 | 6.127456   | 3.089490  | -3.184536 |
| 163 | 6 | 0 | 6.552718   | 4.127443  | -2.316281 |
| 164 | 6 | 0 | 7.638267   | 3.890514  | -1.475552 |
| 165 | 6 | 0 | 12.144916  | 4.125349  | 1.413041  |
| 166 | 1 | 0 | 6.253664   | 1.007795  | -3.664615 |
| 167 | 1 | 0 | 5.298969   | 3.271977  | -3.861499 |
| 168 | 1 | 0 | 7.978224   | 4.692093  | -0.827644 |
| 169 | 1 | 0 | 7.371606   | -0.593540 | -2.211708 |
| 170 | 1 | 0 | 11.012802  | -0.374320 | 0.848773  |
| 171 | 1 | 0 | 12.417790  | 1.429176  | 1.759670  |
| 172 | 1 | 0 | 9.978820   | 4.348676  | -0.205414 |
| 173 | 1 | 0 | 12.144850  | 4.115869  | 2.509438  |
| 174 | 1 | 0 | 13.186628  | 4.005834  | 1.093350  |
| 175 | 1 | 0 | 11.806002  | 5.112333  | 1.087269  |
| 176 | 6 | 0 | 7.923985   | -1.112988 | 3.437942  |
| 177 | 6 | 0 | 8.284290   | -0.811773 | 2.140794  |
| 178 | 6 | 0 | 8.354008   | -1.808664 | 1.135545  |
| 179 | 6 | 0 | 7.947885   | -3.130505 | 1.489726  |
| 180 | 6 | 0 | 7.609917   | -3.408334 | 2.834173  |
| 181 | 6 | 0 | 7.603469   | -2.433693 | 3.817680  |
| 182 | 6 | 0 | 8.776575   | -1.528145 | -0.232677 |
| 183 | 6 | 0 | 7.812206   | -4.139545 | 0.451051  |
| 184 | 6 | 0 | 8.361101   | -3.875851 | -0.832427 |
| 185 | 6 | 0 | 8.871369   | -2.569566 | -1.121506 |
| 186 | 6 | 0 | 8.209831   | -4.849592 | -1.850902 |
| 187 | 6 | 0 | 7.395390   | -5.948643 | -1.669388 |
| 188 | 6 | 0 | 6.709711   | -6.139616 | -0.443447 |

|     |   |   |          |           |           |
|-----|---|---|----------|-----------|-----------|
| 189 | 6 | 0 | 6.999317 | -5.281204 | 0.613597  |
| 190 | 6 | 0 | 7.259186 | -2.757469 | 5.250693  |
| 191 | 1 | 0 | 7.230655 | -6.643796 | -2.487557 |
| 192 | 1 | 0 | 6.446156 | -5.403862 | 1.537429  |
| 193 | 1 | 0 | 8.681449 | -4.676594 | -2.814930 |
| 194 | 1 | 0 | 9.213652 | -2.370097 | -2.133525 |
| 195 | 1 | 0 | 7.360041 | -4.427374 | 3.112271  |
| 196 | 1 | 0 | 8.527642 | 0.211827  | 1.891733  |
| 197 | 1 | 0 | 7.894099 | -0.319951 | 4.181184  |
| 198 | 1 | 0 | 6.988709 | -3.810007 | 5.370422  |
| 199 | 1 | 0 | 8.103232 | -2.550684 | 5.919351  |
| 200 | 1 | 0 | 6.416752 | -2.151379 | 5.603718  |

**Table S30.** Cartesian coordinate of *E,R,E,S,E,R,E,S* (28)

SCF Done: E(RB3LYP) = -4621.32840465 A.U. after 5 cycles

| Center<br>Number | Atomic<br>Number | Atomic<br>Type | Coordinates (Angstroms) |           |           |
|------------------|------------------|----------------|-------------------------|-----------|-----------|
|                  |                  |                | X                       | Y         | Z         |
| 1                | 6                | 0              | -11.410856              | 1.704645  | 1.065373  |
| 2                | 6                | 0              | -10.561604              | 0.762944  | 0.522163  |
| 3                | 6                | 0              | -9.318944               | 1.131184  | -0.045291 |
| 4                | 6                | 0              | -8.957140               | 2.513356  | -0.055583 |
| 5                | 6                | 0              | -9.851571               | 3.448064  | 0.513999  |
| 6                | 6                | 0              | -11.064551              | 3.074329  | 1.072081  |
| 7                | 6                | 0              | -8.432321               | 0.145285  | -0.635245 |
| 8                | 6                | 0              | -7.697843               | 2.923165  | -0.664994 |
| 9                | 6                | 0              | -7.002805               | 1.966820  | -1.456168 |
| 10               | 6                | 0              | -7.385177               | 0.590986  | -1.398771 |
| 11               | 6                | 0              | -5.844463               | 2.363903  | -2.161379 |
| 12               | 6                | 0              | -5.303469               | 3.616926  | -1.980951 |
| 13               | 6                | 0              | -5.881914               | 4.524633  | -1.057499 |
| 14               | 6                | 0              | -7.093525               | 4.184696  | -0.458706 |
| 15               | 6                | 0              | -12.008077              | 4.095200  | 1.660245  |
| 16               | 1                | 0              | -5.341714               | 1.638393  | -2.795414 |
| 17               | 1                | 0              | -4.367433               | 3.878951  | -2.463700 |
| 18               | 1                | 0              | -7.545209               | 4.886814  | 0.234695  |
| 19               | 1                | 0              | -6.731847               | -0.132262 | -1.877640 |
| 20               | 1                | 0              | -10.845151              | -0.284764 | 0.516493  |
| 21               | 1                | 0              | -12.364006              | 1.392108  | 1.484637  |
| 22               | 1                | 0              | -9.598921               | 4.503510  | 0.484058  |
| 23               | 1                | 0              | -12.189984              | 3.901695  | 2.724014  |
| 24               | 1                | 0              | -11.609883              | 5.109164  | 1.568374  |
| 25               | 1                | 0              | -12.983390              | 4.070901  | 1.160435  |
| 26               | 6                | 0              | -8.251606               | -1.643646 | 3.372571  |
| 27               | 6                | 0              | -8.378524               | -1.089529 | 2.115661  |
| 28               | 6                | 0              | -8.326873               | -1.883580 | 0.942690  |
| 29               | 6                | 0              | -8.048322               | -3.274915 | 1.098612  |
| 30               | 6                | 0              | -7.948830               | -3.812252 | 2.402621  |
| 31               | 6                | 0              | -8.058841               | -3.031504 | 3.540975  |
| 32               | 6                | 0              | -8.503452               | -1.330179 | -0.394901 |
| 33               | 6                | 0              | -7.797188               | -4.090920 | -0.079251 |
| 34               | 6                | 0              | -8.109491               | -3.556883 | -1.358339 |
| 35               | 6                | 0              | -8.495050               | -2.182439 | -1.469938 |
| 36               | 6                | 0              | -7.849214               | -4.343498 | -2.507729 |
| 37               | 6                | 0              | -7.144879               | -5.526408 | -2.415848 |
| 38               | 6                | 0              | -6.684764               | -5.992088 | -1.158526 |
| 39               | 6                | 0              | -7.091529               | -5.311300 | -0.014395 |

|    |   |   |           |           |           |
|----|---|---|-----------|-----------|-----------|
| 40 | 6 | 0 | -7.970822 | -3.631245 | 4.922885  |
| 41 | 1 | 0 | -6.888947 | -6.078206 | -3.315724 |
| 42 | 1 | 0 | -6.707261 | -5.645392 | 0.942351  |
| 43 | 1 | 0 | -8.143812 | -3.960888 | -3.481642 |
| 44 | 1 | 0 | -8.654388 | -1.777916 | -2.465963 |
| 45 | 1 | 0 | -7.795967 | -4.880446 | 2.519729  |
| 46 | 1 | 0 | -8.529749 | -0.022149 | 2.028230  |
| 47 | 1 | 0 | -8.308340 | -1.000764 | 4.247569  |
| 48 | 1 | 0 | -7.758234 | -4.702918 | 4.882290  |
| 49 | 1 | 0 | -7.180996 | -3.153497 | 5.514011  |
| 50 | 1 | 0 | -8.908287 | -3.496960 | 5.475633  |
| 51 | 6 | 0 | 11.410566 | 1.707019  | -1.065148 |
| 52 | 6 | 0 | 10.561509 | 0.765103  | -0.522000 |
| 53 | 6 | 0 | 9.318704  | 1.133025  | 0.045341  |
| 54 | 6 | 0 | 8.956543  | 2.515106  | 0.055598  |
| 55 | 6 | 0 | 9.850781  | 3.450037  | -0.513920 |
| 56 | 6 | 0 | 11.063896 | 3.076610  | -1.071916 |
| 57 | 6 | 0 | 8.432299  | 0.146901  | 0.635237  |
| 58 | 6 | 0 | 7.697105  | 2.924606  | 0.664925  |
| 59 | 6 | 0 | 7.002232  | 1.968076  | 1.456020  |
| 60 | 6 | 0 | 7.384959  | 0.592342  | 1.398652  |
| 61 | 6 | 0 | 5.843735  | 2.364856  | 2.161149  |
| 62 | 6 | 0 | 5.302468  | 3.617761  | 1.980731  |
| 63 | 6 | 0 | 5.880784  | 4.525640  | 1.057363  |
| 64 | 6 | 0 | 7.092509  | 4.186007  | 0.458639  |
| 65 | 6 | 0 | 12.007104 | 4.097702  | -1.660207 |
| 66 | 1 | 0 | 5.341104  | 1.639201  | 2.795111  |
| 67 | 1 | 0 | 4.366341  | 3.879567  | 2.463421  |
| 68 | 1 | 0 | 7.544070  | 4.888252  | -0.234713 |
| 69 | 1 | 0 | 6.731764  | -0.131071 | 1.877455  |
| 70 | 1 | 0 | 10.845340 | -0.282527 | -0.516268 |
| 71 | 1 | 0 | 12.363845 | 1.394728  | -1.484298 |
| 72 | 1 | 0 | 9.597868  | 4.505419  | -0.483993 |
| 73 | 1 | 0 | 12.983124 | 4.072303  | -1.161853 |
| 74 | 1 | 0 | 12.187359 | 3.905382  | -2.724480 |
| 75 | 1 | 0 | 11.609547 | 5.111756  | -1.566578 |
| 76 | 6 | 0 | 8.252515  | -1.642347 | -3.372510 |
| 77 | 6 | 0 | 8.379177  | -1.088117 | -2.115623 |
| 78 | 6 | 0 | 8.327557  | -1.882094 | -0.942600 |
| 79 | 6 | 0 | 8.049308  | -3.273502 | -1.098458 |
| 80 | 6 | 0 | 7.950066  | -3.810945 | -2.402442 |
| 81 | 6 | 0 | 8.060063  | -3.030258 | -3.540839 |
| 82 | 6 | 0 | 8.503833  | -1.328557 | 0.394968  |
| 83 | 6 | 0 | 7.798206  | -4.089476 | 0.079431  |
| 84 | 6 | 0 | 8.110264  | -3.555282 | 1.358512  |
| 85 | 6 | 0 | 8.495509  | -2.180752 | 1.470062  |
| 86 | 6 | 0 | 7.850031  | -4.341872 | 2.507934  |
| 87 | 6 | 0 | 7.145926  | -5.524916 | 2.416067  |
| 88 | 6 | 0 | 6.686024  | -5.990774 | 1.158727  |
| 89 | 6 | 0 | 7.092791  | -5.310004 | 0.014592  |
| 90 | 6 | 0 | 7.972525  | -3.630150 | -4.922713 |
| 91 | 1 | 0 | 6.890016  | -6.076707 | 3.315952  |
| 92 | 1 | 0 | 6.708701  | -5.644246 | -0.942173 |
| 93 | 1 | 0 | 8.144466  | -3.959135 | 3.481847  |
| 94 | 1 | 0 | 8.654646  | -1.776126 | 2.466077  |
| 95 | 1 | 0 | 7.797401  | -4.879175 | -2.519492 |
| 96 | 1 | 0 | 8.530147  | -0.020695 | -2.028249 |
| 97 | 1 | 0 | 8.309195  | -0.999513 | -4.247546 |
| 98 | 1 | 0 | 8.910834  | -3.497581 | -5.474458 |

|     |   |   |           |           |           |
|-----|---|---|-----------|-----------|-----------|
| 99  | 1 | 0 | 7.758116  | -4.701461 | -4.882120 |
| 100 | 1 | 0 | 7.184170  | -3.151194 | -5.514809 |
| 101 | 6 | 0 | -0.331806 | -6.035201 | 3.523189  |
| 102 | 6 | 0 | -0.423531 | -6.668396 | 2.301140  |
| 103 | 6 | 0 | 0.718815  | -7.193990 | 1.646310  |
| 104 | 6 | 0 | 1.988691  | -6.974964 | 2.258866  |
| 105 | 6 | 0 | 2.042693  | -6.345172 | 3.523326  |
| 106 | 6 | 0 | 0.911130  | -5.882741 | 4.173886  |
| 107 | 6 | 0 | 0.642821  | -7.924439 | 0.385170  |
| 108 | 6 | 0 | 3.198147  | -7.341482 | 1.539991  |
| 109 | 6 | 0 | 3.087735  | -8.162669 | 0.385667  |
| 110 | 6 | 0 | 1.787387  | -8.472369 | -0.133159 |
| 111 | 6 | 0 | 4.266491  | -8.492597 | -0.328945 |
| 112 | 6 | 0 | 5.476127  | -7.900657 | -0.023334 |
| 113 | 6 | 0 | 5.569919  | -6.966619 | 1.038257  |
| 114 | 6 | 0 | 4.451082  | -6.770381 | 1.842847  |
| 115 | 6 | 0 | 0.990238  | -5.228441 | 5.531282  |
| 116 | 1 | 0 | 4.191594  | -9.164616 | -1.180154 |
| 117 | 1 | 0 | 6.352312  | -8.110025 | -0.630219 |
| 118 | 1 | 0 | 4.511515  | -6.025461 | 2.627375  |
| 119 | 1 | 0 | 1.731401  | -9.052779 | -1.050276 |
| 120 | 1 | 0 | -1.394160 | -6.767025 | 1.833268  |
| 121 | 1 | 0 | -1.233511 | -5.652980 | 3.995396  |
| 122 | 1 | 0 | 3.004424  | -6.233670 | 4.013834  |
| 123 | 1 | 0 | 0.567607  | -4.217235 | 5.509561  |
| 124 | 1 | 0 | 0.423825  | -5.794939 | 6.279907  |
| 125 | 1 | 0 | 2.023323  | -5.152810 | 5.881019  |
| 126 | 6 | 0 | 0.332969  | -6.035838 | -3.523615 |
| 127 | 6 | 0 | 0.424862  | -6.668858 | -2.301483 |
| 128 | 6 | 0 | -0.717378 | -7.194415 | -1.646454 |
| 129 | 6 | 0 | -1.987337 | -6.975601 | -2.258918 |
| 130 | 6 | 0 | -2.041517 | -6.345929 | -3.523425 |
| 131 | 6 | 0 | -0.910050 | -5.883505 | -4.174170 |
| 132 | 6 | 0 | -0.641188 | -7.924621 | -0.385191 |
| 133 | 6 | 0 | -3.196692 | -7.342226 | -1.539917 |
| 134 | 6 | 0 | -3.086067 | -8.163275 | -0.385517 |
| 135 | 6 | 0 | -1.785631 | -8.472658 | 0.133294  |
| 136 | 6 | 0 | -4.264722 | -8.493378 | 0.329179  |
| 137 | 6 | 0 | -5.474489 | -7.901697 | 0.023577  |
| 138 | 6 | 0 | -5.568501 | -6.967751 | -1.038074 |
| 139 | 6 | 0 | -4.449748 | -6.771381 | -1.842748 |
| 140 | 6 | 0 | -0.989353 | -5.229389 | -5.531644 |
| 141 | 1 | 0 | -6.350614 | -8.111203 | 0.630501  |
| 142 | 1 | 0 | -4.510382 | -6.026554 | -2.627349 |
| 143 | 1 | 0 | -4.189654 | -9.165320 | 1.180434  |
| 144 | 1 | 0 | -1.729514 | -9.052852 | 1.050539  |
| 145 | 1 | 0 | -3.003304 | -6.234492 | -4.013834 |
| 146 | 1 | 0 | 1.395544  | -6.767359 | -1.833693 |
| 147 | 1 | 0 | 1.234605  | -5.653667 | -3.995994 |
| 148 | 1 | 0 | -0.423711 | -5.796430 | -6.280447 |
| 149 | 1 | 0 | -2.022553 | -5.153097 | -5.880898 |
| 150 | 1 | 0 | -0.565986 | -4.218488 | -5.510307 |
| 151 | 6 | 0 | -0.910440 | 9.719975  | -3.674429 |
| 152 | 6 | 0 | -0.450176 | 9.419271  | -2.408202 |
| 153 | 6 | 0 | -1.193870 | 8.601443  | -1.525222 |
| 154 | 6 | 0 | -2.454443 | 8.100401  | -1.970506 |
| 155 | 6 | 0 | -2.890609 | 8.423641  | -3.275047 |
| 156 | 6 | 0 | -2.146210 | 9.216612  | -4.134966 |
| 157 | 6 | 0 | -0.724090 | 8.294236  | -0.181495 |



|     |   |   |           |           |           |
|-----|---|---|-----------|-----------|-----------|
| 158 | 6 | 0 | -3.261971 | 7.287101  | -1.071171 |
| 159 | 6 | 0 | -2.900903 | 7.262167  | 0.304389  |
| 160 | 6 | 0 | -1.622559 | 7.758104  | 0.708161  |
| 161 | 6 | 0 | -3.733238 | 6.576982  | 1.220162  |
| 162 | 6 | 0 | -4.789454 | 5.809642  | 0.779296  |
| 163 | 6 | 0 | -5.047142 | 5.671057  | -0.607862 |
| 164 | 6 | 0 | -4.321372 | 6.458098  | -1.500217 |
| 165 | 6 | 0 | -2.640644 | 9.557090  | -5.519780 |
| 166 | 1 | 0 | -3.478395 | 6.597281  | 2.276507  |
| 167 | 1 | 0 | -5.361775 | 5.216710  | 1.485879  |
| 168 | 1 | 0 | -4.530468 | 6.366024  | -2.561126 |
| 169 | 1 | 0 | -1.307941 | 7.543633  | 1.724267  |
| 170 | 1 | 0 | 0.492855  | 9.832661  | -2.067345 |
| 171 | 1 | 0 | -0.320737 | 10.364934 | -4.321232 |
| 172 | 1 | 0 | -3.861634 | 8.069428  | -3.606771 |
| 173 | 1 | 0 | -2.708115 | 10.641641 | -5.663470 |
| 174 | 1 | 0 | -1.959642 | 9.175021  | -6.289532 |
| 175 | 1 | 0 | -3.629907 | 9.131831  | -5.708797 |
| 176 | 6 | 0 | 0.908407  | 9.720095  | 3.674364  |
| 177 | 6 | 0 | 0.448186  | 9.419326  | 2.408136  |
| 178 | 6 | 0 | 1.192000  | 8.601616  | 1.525150  |
| 179 | 6 | 0 | 2.452654  | 8.100769  | 1.970424  |
| 180 | 6 | 0 | 2.888770  | 8.424063  | 3.274968  |
| 181 | 6 | 0 | 2.144246  | 9.216903  | 4.134900  |
| 182 | 6 | 0 | 0.722264  | 8.294344  | 0.181422  |
| 183 | 6 | 0 | 3.260319  | 7.287616  | 1.071079  |
| 184 | 6 | 0 | 2.899243  | 7.262621  | -0.304478 |
| 185 | 6 | 0 | 1.620811  | 7.758350  | -0.708237 |
| 186 | 6 | 0 | 3.731682  | 6.577584  | -1.220263 |
| 187 | 6 | 0 | 4.788046  | 5.810436  | -0.779410 |
| 188 | 6 | 0 | 5.045780  | 5.671907  | 0.607742  |
| 189 | 6 | 0 | 4.319875  | 6.458805  | 1.500112  |
| 190 | 6 | 0 | 2.638572  | 9.557323  | 5.519768  |
| 191 | 1 | 0 | 5.360475  | 5.217613  | -1.485998 |
| 192 | 1 | 0 | 4.528996  | 6.366752  | 2.561018  |
| 193 | 1 | 0 | 3.476818  | 6.597832  | -2.276604 |
| 194 | 1 | 0 | 1.306219  | 7.543822  | -1.724339 |
| 195 | 1 | 0 | 3.859854  | 8.070003  | 3.606683  |
| 196 | 1 | 0 | -0.494902 | 9.832587  | 2.067276  |
| 197 | 1 | 0 | 0.318614  | 10.364972 | 4.321167  |
| 198 | 1 | 0 | 1.958236  | 9.173986  | 6.289485  |
| 199 | 1 | 0 | 3.628409  | 9.133206  | 5.708348  |
| 200 | 1 | 0 | 2.704691  | 10.641880 | 5.663996  |

**Table S31.** Cartesian coordinate of  $Z,R,Z,R,Z,R,Z,R$  (29)

SCF Done: E(RB3LYP) = -4621.32672366 A.U. after 14 cycles

| Center<br>Number | Atomic<br>Number | Atomic<br>Type | Coordinates (Angstroms) |          |           |
|------------------|------------------|----------------|-------------------------|----------|-----------|
|                  |                  |                | X                       | Y        | Z         |
| 1                | 6                | 0              | 3.257927                | 6.058561 | 3.022513  |
| 2                | 6                | 0              | 3.984061                | 6.186119 | 1.856675  |
| 3                | 6                | 0              | 3.465908                | 6.866990 | 0.726560  |
| 4                | 6                | 0              | 2.122063                | 7.342612 | 0.801830  |
| 5                | 6                | 0              | 1.417389                | 7.217773 | 2.021288  |
| 6                | 6                | 0              | 1.960195                | 6.601164 | 3.135826  |
| 7                | 6                | 0              | 4.229318                | 7.055718 | -0.502076 |
| 8                | 6                | 0              | 1.481659                | 7.871251 | -0.392313 |

|    |   |   |            |           |           |
|----|---|---|------------|-----------|-----------|
| 9  | 6 | 0 | 2.285835   | 8.157353  | -1.528238 |
| 10 | 6 | 0 | 3.664641   | 7.771681  | -1.527445 |
| 11 | 6 | 0 | 1.660037   | 8.645708  | -2.701974 |
| 12 | 6 | 0 | 0.285026   | 8.683630  | -2.812546 |
| 13 | 6 | 0 | -0.533734  | 8.262588  | -1.734931 |
| 14 | 6 | 0 | 0.078490   | 7.939402  | -0.527483 |
| 15 | 6 | 0 | 1.196499   | 6.495513  | 4.432904  |
| 16 | 6 | 0 | 8.046819   | 7.360272  | 1.776463  |
| 17 | 6 | 0 | 6.909649   | 7.339878  | 0.995536  |
| 18 | 6 | 0 | 6.667444   | 6.294556  | 0.073495  |
| 19 | 6 | 0 | 7.637871   | 5.252580  | -0.044980 |
| 20 | 6 | 0 | 8.787308   | 5.304932  | 0.775975  |
| 21 | 6 | 0 | 9.010445   | 6.331819  | 1.680430  |
| 22 | 6 | 0 | 5.480711   | 6.277198  | -0.762288 |
| 23 | 6 | 0 | 7.431565   | 4.184512  | -1.014898 |
| 24 | 6 | 0 | 6.416837   | 4.368346  | -1.994184 |
| 25 | 6 | 0 | 5.450414   | 5.406844  | -1.821012 |
| 26 | 6 | 0 | 6.276622   | 3.417460  | -3.030300 |
| 27 | 6 | 0 | 7.000736   | 2.246883  | -3.015015 |
| 28 | 6 | 0 | 7.874814   | 1.956051  | -1.936376 |
| 29 | 6 | 0 | 8.122558   | 2.950731  | -0.992920 |
| 30 | 6 | 0 | 10.254165  | 6.371562  | 2.534824  |
| 31 | 6 | 0 | -8.048179  | -7.357361 | 1.778978  |
| 32 | 6 | 0 | -6.911063  | -7.338181 | 0.997942  |
| 33 | 6 | 0 | -6.668513  | -6.293877 | 0.074810  |
| 34 | 6 | 0 | -7.638543  | -5.251662 | -0.044522 |
| 35 | 6 | 0 | -8.788039  | -5.302869 | 0.776416  |
| 36 | 6 | 0 | -9.011453  | -6.328727 | 1.681982  |
| 37 | 6 | 0 | -5.481772  | -6.277727 | -0.761145 |
| 38 | 6 | 0 | -7.431854  | -4.184334 | -1.015103 |
| 39 | 6 | 0 | -6.416903  | -4.368820 | -1.994044 |
| 40 | 6 | 0 | -5.450911  | -5.407744 | -1.820225 |
| 41 | 6 | 0 | -6.276120  | -3.418261 | -3.030429 |
| 42 | 6 | 0 | -6.999772  | -2.247282 | -3.015641 |
| 43 | 6 | 0 | -7.874255  | -1.956090 | -1.937443 |
| 44 | 6 | 0 | -8.122677  | -2.950496 | -0.993922 |
| 45 | 6 | 0 | -10.254918 | -6.367080 | 2.536803  |
| 46 | 6 | 0 | -3.257276  | -6.056432 | 3.022607  |
| 47 | 6 | 0 | -3.983799  | -6.184529 | 1.857052  |
| 48 | 6 | 0 | -3.466563  | -6.867007 | 0.727556  |
| 49 | 6 | 0 | -2.122806  | -7.342968 | 0.802731  |
| 50 | 6 | 0 | -1.417696  | -7.217524 | 2.021865  |
| 51 | 6 | 0 | -1.959951  | -6.599845 | 3.136100  |
| 52 | 6 | 0 | -4.230669  | -7.056778 | -0.500533 |
| 53 | 6 | 0 | -1.483029  | -7.872707 | -0.391228 |
| 54 | 6 | 0 | -2.287706  | -8.159789 | -1.526537 |
| 55 | 6 | 0 | -3.666555  | -7.773970 | -1.525447 |
| 56 | 6 | 0 | -1.662121  | -8.648610 | -2.700244 |
| 57 | 6 | 0 | -0.287058  | -8.685397 | -2.811586 |
| 58 | 6 | 0 | 0.531958   | -8.263400 | -1.734512 |
| 59 | 6 | 0 | -0.079934  | -7.940271 | -0.526982 |
| 60 | 6 | 0 | -1.196020  | -6.494247 | 4.433078  |
| 61 | 6 | 0 | 7.365608   | -8.047007 | 1.775454  |
| 62 | 6 | 0 | 7.343931   | -6.909776 | 0.994697  |
| 63 | 6 | 0 | 6.295706   | -6.666309 | 0.076220  |
| 64 | 6 | 0 | 5.252889   | -7.636031 | -0.039768 |
| 65 | 6 | 0 | 5.306504   | -8.785487 | 0.781095  |
| 66 | 6 | 0 | 6.335734   | -9.009509 | 1.682673  |
| 67 | 6 | 0 | 6.277283   | -5.479623 | -0.759730 |

|     |   |   |           |            |           |
|-----|---|---|-----------|------------|-----------|
| 68  | 6 | 0 | 4.183556  | -7.429807  | -1.008281 |
| 69  | 6 | 0 | 4.366506  | -6.415762  | -1.988510 |
| 70  | 6 | 0 | 5.405337  | -5.449327  | -1.816970 |
| 71  | 6 | 0 | 3.414916  | -6.276446  | -3.024122 |
| 72  | 6 | 0 | 2.244697  | -7.001159  | -3.007822 |
| 73  | 6 | 0 | 1.955047  | -7.874817  | -1.928582 |
| 74  | 6 | 0 | 2.950010  | -8.121193  | -0.985129 |
| 75  | 6 | 0 | 6.376436  | -10.253105 | 2.537174  |
| 76  | 6 | 0 | 6.064867  | -3.252052  | 3.022374  |
| 77  | 6 | 0 | 6.190972  | -3.980010  | 1.857481  |
| 78  | 6 | 0 | 6.870859  | -3.463750  | 0.725924  |
| 79  | 6 | 0 | 7.347134  | -2.120012  | 0.798772  |
| 80  | 6 | 0 | 7.223851  | -1.413510  | 2.017266  |
| 81  | 6 | 0 | 6.608016  | -1.954350  | 3.133205  |
| 82  | 6 | 0 | 7.057648  | -4.228838  | -0.501931 |
| 83  | 6 | 0 | 7.874318  | -1.481331  | -0.396808 |
| 84  | 6 | 0 | 8.158329  | -2.286902  | -1.532230 |
| 85  | 6 | 0 | 7.772255  | -3.665655  | -1.529097 |
| 86  | 6 | 0 | 8.644310  | -1.662234  | -2.707568 |
| 87  | 6 | 0 | 8.681278  | -0.287311  | -2.819914 |
| 88  | 6 | 0 | 8.262275  | 0.532663   | -1.742403 |
| 89  | 6 | 0 | 7.941964  | -0.078429  | -0.533644 |
| 90  | 6 | 0 | 6.504070  | -1.188773  | 4.429335  |
| 91  | 6 | 0 | -7.364777 | 8.045339   | 1.780270  |
| 92  | 6 | 0 | -7.343331 | 6.908232   | 0.999233  |
| 93  | 6 | 0 | -6.296808 | 6.666262   | 0.078416  |
| 94  | 6 | 0 | -5.254381 | 7.636347   | -0.037973 |
| 95  | 6 | 0 | -5.307411 | 8.785304   | 0.783541  |
| 96  | 6 | 0 | -6.335886 | 9.008786   | 1.686083  |
| 97  | 6 | 0 | -6.279244 | 5.480517   | -0.758919 |
| 98  | 6 | 0 | -4.185733 | 7.430791   | -1.007383 |
| 99  | 6 | 0 | -4.369713 | 6.417873   | -1.988575 |
| 100 | 6 | 0 | -5.408580 | 5.451484   | -1.817238 |
| 101 | 6 | 0 | -3.418735 | 6.279137   | -3.024784 |
| 102 | 6 | 0 | -2.248089 | 7.003068   | -3.008206 |
| 103 | 6 | 0 | -1.957340 | 7.875466   | -1.928260 |
| 104 | 6 | 0 | -2.951759 | 8.121576   | -0.984063 |
| 105 | 6 | 0 | -6.377072 | 10.252861  | 2.539952  |
| 106 | 6 | 0 | -6.058113 | 3.249802   | 3.020365  |
| 107 | 6 | 0 | -6.187753 | 3.978965   | 1.856583  |
| 108 | 6 | 0 | -6.869355 | 3.463230   | 0.725903  |
| 109 | 6 | 0 | -7.344498 | 2.119067   | 0.798429  |
| 110 | 6 | 0 | -7.218195 | 1.411558   | 2.015996  |
| 111 | 6 | 0 | -6.599791 | 1.951507   | 3.131038  |
| 112 | 6 | 0 | -7.058282 | 4.229048   | -0.501105 |
| 113 | 6 | 0 | -7.872778 | 1.480788   | -0.397000 |
| 114 | 6 | 0 | -8.158302 | 2.286755   | -1.531741 |
| 115 | 6 | 0 | -7.773213 | 3.665791   | -1.528055 |
| 116 | 6 | 0 | -8.645033 | 1.662510   | -2.706974 |
| 117 | 6 | 0 | -8.681759 | 0.287726   | -2.820039 |
| 118 | 6 | 0 | -8.261473 | -0.532590  | -1.743374 |
| 119 | 6 | 0 | -7.940013 | 0.077961   | -0.534657 |
| 120 | 6 | 0 | -6.492855 | 1.184275   | 4.425948  |
| 121 | 1 | 0 | 2.281001  | 8.916152   | -3.552273 |
| 122 | 1 | 0 | -0.176108 | 8.987676   | -3.747886 |
| 123 | 1 | 0 | -0.548004 | 7.575014   | 0.278261  |
| 124 | 1 | 0 | 4.240202  | 7.938815   | -2.433939 |
| 125 | 1 | 0 | 4.977513  | 5.761766   | 1.811771  |
| 126 | 1 | 0 | 3.696063  | 5.537606   | 3.870284  |

|     |   |   |            |            |           |
|-----|---|---|------------|------------|-----------|
| 127 | 1 | 0 | 0.417318   | 7.632851   | 2.094771  |
| 128 | 1 | 0 | 1.094961   | 5.451097   | 4.749888  |
| 129 | 1 | 0 | 0.192185   | 6.918013   | 4.343431  |
| 130 | 1 | 0 | 1.711991   | 7.025944   | 5.242415  |
| 131 | 1 | 0 | 6.820544   | 1.487929   | -3.769675 |
| 132 | 1 | 0 | 8.809294   | 2.735425   | -0.180626 |
| 133 | 1 | 0 | 5.530873   | 3.588152   | -3.802216 |
| 134 | 1 | 0 | 4.588669   | 5.404295   | -2.481734 |
| 135 | 1 | 0 | 9.544063   | 4.533715   | 0.670931  |
| 136 | 1 | 0 | 6.182427   | 8.141668   | 1.075604  |
| 137 | 1 | 0 | 8.210549   | 8.183427   | 2.467580  |
| 138 | 1 | 0 | 10.004484  | 6.341518   | 3.602130  |
| 139 | 1 | 0 | 10.824140  | 7.292622   | 2.366628  |
| 140 | 1 | 0 | 10.913230  | 5.525835   | 2.321980  |
| 141 | 1 | 0 | -5.530130  | -3.589412  | -3.802005 |
| 142 | 1 | 0 | -6.819154  | -1.488512  | -3.770396 |
| 143 | 1 | 0 | -8.809319  | -2.734592  | -0.181700 |
| 144 | 1 | 0 | -4.588822  | -5.405670  | -2.480512 |
| 145 | 1 | 0 | -6.183993  | -8.139961  | 1.079104  |
| 146 | 1 | 0 | -8.212180  | -8.179742  | 2.470952  |
| 147 | 1 | 0 | -9.544394  | -4.531345  | 0.670813  |
| 148 | 1 | 0 | -10.825445 | -7.287982  | 2.369591  |
| 149 | 1 | 0 | -10.913619 | -5.521186  | 2.323487  |
| 150 | 1 | 0 | -10.004868 | -6.336281  | 3.604008  |
| 151 | 1 | 0 | 0.173903   | -8.989332  | -3.747046 |
| 152 | 1 | 0 | 0.546624   | -7.574722  | 0.278190  |
| 153 | 1 | 0 | -2.283310  | -8.919783  | -3.550142 |
| 154 | 1 | 0 | -4.242482  | -7.941589  | -2.431613 |
| 155 | 1 | 0 | -0.417904  | -7.633299  | 2.095414  |
| 156 | 1 | 0 | -4.976814  | -5.759278  | 1.811682  |
| 157 | 1 | 0 | -3.694853  | -5.534497  | 3.870053  |
| 158 | 1 | 0 | -0.191521  | -6.916254  | 4.343280  |
| 159 | 1 | 0 | -1.711038  | -7.025347  | 5.242449  |
| 160 | 1 | 0 | -1.094973  | -5.449927  | 4.750506  |
| 161 | 1 | 0 | 3.584983   | -5.531163  | -3.796628 |
| 162 | 1 | 0 | 1.485313   | -6.822333  | -3.762400 |
| 163 | 1 | 0 | 2.735427   | -8.807861  | -0.172556 |
| 164 | 1 | 0 | 5.402300   | -4.587754  | -2.477908 |
| 165 | 1 | 0 | 8.146994   | -6.183626  | 1.071739  |
| 166 | 1 | 0 | 8.191120   | -8.211972  | 2.463455  |
| 167 | 1 | 0 | 4.534611   | -9.541774  | 0.677777  |
| 168 | 1 | 0 | 6.356524   | -10.002657 | 3.604460  |
| 169 | 1 | 0 | 5.525879   | -10.908276 | 2.331552  |
| 170 | 1 | 0 | 7.293344   | -10.827645 | 2.361592  |
| 171 | 1 | 0 | 8.983899   | 0.172758   | -3.756223 |
| 172 | 1 | 0 | 7.578224   | 0.548583   | 0.272012  |
| 173 | 1 | 0 | 8.913444   | -2.284056  | -3.557657 |
| 174 | 1 | 0 | 7.936937   | -4.242274  | -2.435380 |
| 175 | 1 | 0 | 7.639694   | -0.413610  | 2.088709  |
| 176 | 1 | 0 | 5.765702   | -4.973154  | 1.814202  |
| 177 | 1 | 0 | 5.544549   | -3.688741  | 3.871279  |
| 178 | 1 | 0 | 6.926869   | -0.184722  | 4.338138  |
| 179 | 1 | 0 | 7.035184   | -1.703381  | 5.238979  |
| 180 | 1 | 0 | 5.460062   | -1.086400  | 4.747372  |
| 181 | 1 | 0 | -3.589716  | 5.534957   | -3.798155 |
| 182 | 1 | 0 | -1.489342  | 6.824802   | -3.763562 |
| 183 | 1 | 0 | -2.736450  | 8.807321   | -0.170887 |
| 184 | 1 | 0 | -5.406181  | 4.590647   | -2.479138 |
| 185 | 1 | 0 | -8.145609  | 6.181351   | 1.077521  |

|     |   |   |           |           |           |
|-----|---|---|-----------|-----------|-----------|
| 186 | 1 | 0 | -8.189169 | 8.209362  | 2.469823  |
| 187 | 1 | 0 | -4.535888 | 9.541871  | 0.679485  |
| 188 | 1 | 0 | -5.531454 | 10.912266 | 2.327737  |
| 189 | 1 | 0 | -6.348160 | 10.003644 | 3.607345  |
| 190 | 1 | 0 | -7.298126 | 10.822538 | 2.370521  |
| 191 | 1 | 0 | -8.985194 | -0.171964 | -3.756259 |
| 192 | 1 | 0 | -7.575710 | -0.549589 | 0.270281  |
| 193 | 1 | 0 | -8.915244 | 2.284668  | -3.556460 |
| 194 | 1 | 0 | -7.939281 | 4.242865  | -2.433795 |
| 195 | 1 | 0 | -7.632413 | 0.410992  | 2.087144  |
| 196 | 1 | 0 | -5.762979 | 4.972395  | 1.813329  |
| 197 | 1 | 0 | -5.535718 | 3.685826  | 3.868328  |
| 198 | 1 | 0 | -6.915989 | 0.180379  | 4.334414  |
| 199 | 1 | 0 | -7.022122 | 1.697841  | 5.237475  |
| 200 | 1 | 0 | -5.448067 | 1.081346  | 4.741169  |

**Table S32.** Cartesian coordinate of *E,R,E,R,Z,R,Z,S* (30)

SCF Done: E(RB3LYP) = -4621.32392142 A.U. after 14 cycles

| Center<br>Number | Atomic<br>Number | Atomic<br>Type | Coordinates (Angstroms) |           |           |
|------------------|------------------|----------------|-------------------------|-----------|-----------|
|                  |                  |                | X                       | Y         | Z         |
| 1                | 6                | 0              | 2.488356                | 9.976287  | 1.414034  |
| 2                | 6                | 0              | 1.608916                | 9.217570  | 0.669602  |
| 3                | 6                | 0              | 2.069572                | 8.226591  | -0.229012 |
| 4                | 6                | 0              | 3.477092                | 8.025259  | -0.357489 |
| 5                | 6                | 0              | 4.347122                | 8.817868  | 0.425307  |
| 6                | 6                | 0              | 3.883905                | 9.785355  | 1.303895  |
| 7                | 6                | 0              | 1.149184                | 7.439241  | -1.029350 |
| 8                | 6                | 0              | 3.975504                | 7.026978  | -1.294192 |
| 9                | 6                | 0              | 3.061656                | 6.493638  | -2.245212 |
| 10               | 6                | 0              | 1.657670                | 6.704351  | -2.068101 |
| 11               | 6                | 0              | 3.544045                | 5.619597  | -3.246254 |
| 12               | 6                | 0              | 4.839813                | 5.153241  | -3.212332 |
| 13               | 6                | 0              | 5.706101                | 5.515815  | -2.149418 |
| 14               | 6                | 0              | 5.284515                | 6.495228  | -1.253126 |
| 15               | 6                | 0              | 4.834395                | 10.631239 | 2.115959  |
| 16               | 1                | 0              | 2.852898                | 5.254274  | -4.001304 |
| 17               | 1                | 0              | 5.168185                | 4.411917  | -3.934155 |
| 18               | 1                | 0              | 5.956491                | 6.789381  | -0.453358 |
| 19               | 1                | 0              | 0.979354                | 6.141160  | -2.702608 |
| 20               | 1                | 0              | 0.540006                | 9.382729  | 0.759124  |
| 21               | 1                | 0              | 2.104763                | 10.739140 | 2.087000  |
| 22               | 1                | 0              | 5.419397                | 8.692364  | 0.309836  |
| 23               | 1                | 0              | 4.693029                | 11.698574 | 1.910044  |
| 24               | 1                | 0              | 5.876915                | 10.383620 | 1.899206  |
| 25               | 1                | 0              | 4.672795                | 10.489863 | 3.191201  |
| 26               | 6                | 0              | -0.311094               | 5.915653  | 2.796816  |
| 27               | 6                | 0              | 0.134243                | 6.436049  | 1.599982  |
| 28               | 6                | 0              | -0.752817               | 6.700998  | 0.526308  |
| 29               | 6                | 0              | -2.121361               | 6.331755  | 0.691123  |
| 30               | 6                | 0              | -2.546666               | 5.826901  | 1.942147  |
| 31               | 6                | 0              | -1.676782               | 5.623262  | 2.999685  |
| 32               | 6                | 0              | -0.309162               | 7.291471  | -0.730965 |
| 33               | 6                | 0              | -3.029989               | 6.419746  | -0.441980 |
| 34               | 6                | 0              | -2.589046               | 7.074555  | -1.624382 |
| 35               | 6                | 0              | -1.232869               | 7.525391  | -1.716811 |
| 36               | 6                | 0              | -3.464782               | 7.138729  | -2.736108 |

|    |   |   |           |           |           |
|----|---|---|-----------|-----------|-----------|
| 37 | 6 | 0 | -4.671787 | 6.470133  | -2.735326 |
| 38 | 6 | 0 | -5.075621 | 5.717233  | -1.604339 |
| 39 | 6 | 0 | -4.274762 | 5.755822  | -0.466649 |
| 40 | 6 | 0 | -2.158162 | 5.096853  | 4.329419  |
| 41 | 1 | 0 | -5.303797 | 6.490388  | -3.618433 |
| 42 | 1 | 0 | -4.563017 | 5.139438  | 0.376427  |
| 43 | 1 | 0 | -3.143722 | 7.678392  | -3.623423 |
| 44 | 1 | 0 | -0.909006 | 7.982603  | -2.648105 |
| 45 | 1 | 0 | -3.597196 | 5.598927  | 2.088790  |
| 46 | 1 | 0 | 1.187713  | 6.651269  | 1.483054  |
| 47 | 1 | 0 | 0.400520  | 5.733915  | 3.598492  |
| 48 | 1 | 0 | -3.229180 | 4.878147  | 4.310699  |
| 49 | 1 | 0 | -1.977888 | 5.820705  | 5.133081  |
| 50 | 1 | 0 | -1.631936 | 4.175818  | 4.605800  |
| 51 | 6 | 0 | -0.757975 | -5.530693 | -3.321144 |
| 52 | 6 | 0 | -0.763694 | -6.123303 | -2.075565 |
| 53 | 6 | 0 | 0.421743  | -6.633367 | -1.488586 |
| 54 | 6 | 0 | 1.642257  | -6.449231 | -2.199906 |
| 55 | 6 | 0 | 1.608662  | -5.859168 | -3.484026 |
| 56 | 6 | 0 | 0.435537  | -5.406018 | -4.063753 |
| 57 | 6 | 0 | 0.437351  | -7.314219 | -0.198137 |
| 58 | 6 | 0 | 2.894833  | -6.824355 | -1.566304 |
| 59 | 6 | 0 | 2.865473  | -7.627321 | -0.395616 |
| 60 | 6 | 0 | 1.606475  | -7.876181 | 0.246983  |
| 61 | 6 | 0 | 4.102378  | -7.997552 | 0.191897  |
| 62 | 6 | 0 | 5.299016  | -7.468251 | -0.252388 |
| 63 | 6 | 0 | 5.323750  | -6.526166 | -1.313925 |
| 64 | 6 | 0 | 4.125070  | -6.285111 | -1.983032 |
| 65 | 6 | 0 | 0.419529  | -4.792531 | -5.442240 |
| 66 | 1 | 0 | 4.094511  | -8.663128 | 1.051415  |
| 67 | 1 | 0 | 6.221515  | -7.738731 | 0.252560  |
| 68 | 1 | 0 | 4.107417  | -5.534078 | -2.760783 |
| 69 | 1 | 0 | 1.612522  | -8.417612 | 1.189555  |
| 70 | 1 | 0 | -1.698646 | -6.203514 | -1.537162 |
| 71 | 1 | 0 | -1.690281 | -5.160427 | -3.740398 |
| 72 | 1 | 0 | 2.531494  | -5.776450 | -4.049177 |
| 73 | 1 | 0 | 0.030557  | -3.767948 | -5.415698 |
| 74 | 1 | 0 | -0.224575 | -5.360763 | -6.123530 |
| 75 | 1 | 0 | 1.421299  | -4.759415 | -5.878907 |
| 76 | 6 | 0 | 0.470157  | -4.970612 | 3.451884  |
| 77 | 6 | 0 | 0.458958  | -5.777798 | 2.333339  |
| 78 | 6 | 0 | -0.746554 | -6.313663 | 1.815303  |
| 79 | 6 | 0 | -1.965735 | -5.935223 | 2.449891  |
| 80 | 6 | 0 | -1.915508 | -5.123987 | 3.606246  |
| 81 | 6 | 0 | -0.725425 | -4.642595 | 4.126070  |
| 82 | 6 | 0 | -0.781450 | -7.211155 | 0.666236  |
| 83 | 6 | 0 | -3.229592 | -6.347288 | 1.861607  |
| 84 | 6 | 0 | -3.225583 | -7.350670 | 0.855858  |
| 85 | 6 | 0 | -1.973531 | -7.783036 | 0.304470  |
| 86 | 6 | 0 | -4.465980 | -7.748666 | 0.296213  |
| 87 | 6 | 0 | -5.636113 | -7.078304 | 0.594315  |
| 88 | 6 | 0 | -5.627419 | -5.969205 | 1.478622  |
| 89 | 6 | 0 | -4.436290 | -5.677378 | 2.140032  |
| 90 | 6 | 0 | -0.693381 | -3.790845 | 5.371258  |
| 91 | 1 | 0 | -6.563131 | -7.374322 | 0.112188  |
| 92 | 1 | 0 | -4.403113 | -4.805566 | 2.780717  |
| 93 | 1 | 0 | -4.476374 | -8.556195 | -0.431535 |
| 94 | 1 | 0 | -1.998582 | -8.480932 | -0.528513 |
| 95 | 1 | 0 | -2.840401 | -4.884061 | 4.121081  |

|     |   |   |            |           |           |
|-----|---|---|------------|-----------|-----------|
| 96  | 1 | 0 | 1.395211   | -6.010815 | 1.843048  |
| 97  | 1 | 0 | 1.416812   | -4.586449 | 3.823880  |
| 98  | 1 | 0 | -1.700038  | -3.598166 | 5.751774  |
| 99  | 1 | 0 | -0.216361  | -2.823146 | 5.177447  |
| 100 | 1 | 0 | -0.119866  | -4.275165 | 6.170430  |
| 101 | 6 | 0 | -10.454977 | -2.315199 | -3.125196 |
| 102 | 6 | 0 | -10.138592 | -1.379516 | -2.161077 |
| 103 | 6 | 0 | -9.396457  | -1.727419 | -1.007531 |
| 104 | 6 | 0 | -8.988976  | -3.086575 | -0.853051 |
| 105 | 6 | 0 | -9.326273  | -4.015912 | -1.862573 |
| 106 | 6 | 0 | -10.045138 | -3.659746 | -2.993120 |
| 107 | 6 | 0 | -9.074755  | -0.751588 | 0.023879  |
| 108 | 6 | 0 | -8.251225  | -3.482605 | 0.338125  |
| 109 | 6 | 0 | -8.214829  | -2.572811 | 1.429544  |
| 110 | 6 | 0 | -8.623110  | -1.217300 | 1.235018  |
| 111 | 6 | 0 | -7.597277  | -2.982289 | 2.636118  |
| 112 | 6 | 0 | -6.889005  | -4.160562 | 2.704760  |
| 113 | 6 | 0 | -6.733279  | -4.980177 | 1.555770  |
| 114 | 6 | 0 | -7.482137  | -4.663933 | 0.422396  |
| 115 | 6 | 0 | -10.404471 | -4.674550 | -4.050971 |
| 116 | 1 | 0 | -7.638895  | -2.320446 | 3.497283  |
| 117 | 1 | 0 | -6.394065  | -4.437189 | 3.630243  |
| 118 | 1 | 0 | -7.360888  | -5.271931 | -0.467391 |
| 119 | 1 | 0 | -8.402679  | -0.513642 | 2.031409  |
| 120 | 1 | 0 | -10.478728 | -0.355811 | -2.273748 |
| 121 | 1 | 0 | -11.040216 | -2.016813 | -3.991521 |
| 122 | 1 | 0 | -9.044370  | -5.056348 | -1.732997 |
| 123 | 1 | 0 | -9.973369  | -4.405080 | -5.022391 |
| 124 | 1 | 0 | -11.489901 | -4.738079 | -4.190309 |
| 125 | 1 | 0 | -10.041318 | -5.672046 | -3.789625 |
| 126 | 6 | 0 | -10.507670 | 2.461577  | 2.704009  |
| 127 | 6 | 0 | -10.185855 | 1.480712  | 1.787971  |
| 128 | 6 | 0 | -9.301085  | 1.732870  | 0.712745  |
| 129 | 6 | 0 | -8.753539  | 3.045879  | 0.582364  |
| 130 | 6 | 0 | -9.103293  | 4.023001  | 1.541743  |
| 131 | 6 | 0 | -9.961231  | 3.758853  | 2.598129  |
| 132 | 6 | 0 | -8.972985  | 0.707794  | -0.266743 |
| 133 | 6 | 0 | -7.867764  | 3.349786  | -0.534129 |
| 134 | 6 | 0 | -7.785508  | 2.402973  | -1.592513 |
| 135 | 6 | 0 | -8.335044  | 1.096005  | -1.419093 |
| 136 | 6 | 0 | -7.016556  | 2.716025  | -2.737785 |
| 137 | 6 | 0 | -6.244086  | 3.855282  | -2.782899 |
| 138 | 6 | 0 | -6.183500  | 4.728236  | -1.667232 |
| 139 | 6 | 0 | -7.036529  | 4.490437  | -0.591012 |
| 140 | 6 | 0 | -10.326145 | 4.824966  | 3.602323  |
| 141 | 1 | 0 | -5.598377  | 4.037926  | -3.636111 |
| 142 | 1 | 0 | -7.005364  | 5.173454  | 0.251414  |
| 143 | 1 | 0 | -6.987850  | 2.004967  | -3.559232 |
| 144 | 1 | 0 | -8.098738  | 0.355015  | -2.175841 |
| 145 | 1 | 0 | -8.714872  | 5.030576  | 1.431478  |
| 146 | 1 | 0 | -10.633187 | 0.496592  | 1.875292  |
| 147 | 1 | 0 | -11.202692 | 2.237486  | 3.509498  |
| 148 | 1 | 0 | -9.857535  | 5.782263  | 3.359117  |
| 149 | 1 | 0 | -10.008312 | 4.543932  | 4.613408  |
| 150 | 1 | 0 | -11.410303 | 4.981772  | 3.641022  |
| 151 | 6 | 0 | 7.170810   | 0.549011  | 3.081565  |
| 152 | 6 | 0 | 7.749966   | -0.020313 | 1.966382  |
| 153 | 6 | 0 | 8.069935   | 0.744134  | 0.815510  |
| 154 | 6 | 0 | 7.668104   | 2.114031  | 0.811851  |

|     |   |   |           |           |           |
|-----|---|---|-----------|-----------|-----------|
| 155 | 6 | 0 | 7.106797  | 2.672434  | 1.983301  |
| 156 | 6 | 0 | 6.865699  | 1.925552  | 3.123494  |
| 157 | 6 | 0 | 8.739253  | 0.187556  | -0.359069 |
| 158 | 6 | 0 | 7.755337  | 2.881279  | -0.419727 |
| 159 | 6 | 0 | 8.506557  | 2.353637  | -1.503237 |
| 160 | 6 | 0 | 9.030678  | 1.024385  | -1.409141 |
| 161 | 6 | 0 | 8.548131  | 3.080621  | -2.719733 |
| 162 | 6 | 0 | 7.741613  | 4.183591  | -2.919520 |
| 163 | 6 | 0 | 6.879951  | 4.638377  | -1.890209 |
| 164 | 6 | 0 | 6.964133  | 4.027025  | -0.642745 |
| 165 | 6 | 0 | 6.284703  | 2.546644  | 4.369775  |
| 166 | 1 | 0 | 9.164689  | 2.705666  | -3.532760 |
| 167 | 1 | 0 | 7.727411  | 4.676916  | -3.887275 |
| 168 | 1 | 0 | 6.268760  | 4.343453  | 0.125487  |
| 169 | 1 | 0 | 9.557349  | 0.624600  | -2.271677 |
| 170 | 1 | 0 | 7.967257  | -1.078128 | 1.981616  |
| 171 | 1 | 0 | 6.953145  | -0.074721 | 3.945112  |
| 172 | 1 | 0 | 6.864692  | 3.730309  | 1.995361  |
| 173 | 1 | 0 | 6.987012  | 2.485274  | 5.209696  |
| 174 | 1 | 0 | 5.369374  | 2.030135  | 4.680818  |
| 175 | 1 | 0 | 6.039660  | 3.600936  | 4.215856  |
| 176 | 6 | 0 | 10.867661 | -2.697451 | 2.315849  |
| 177 | 6 | 0 | 10.344446 | -1.806091 | 1.401267  |
| 178 | 6 | 0 | 9.414012  | -2.220081 | 0.419818  |
| 179 | 6 | 0 | 9.035466  | -3.596279 | 0.380707  |
| 180 | 6 | 0 | 9.580290  | -4.477319 | 1.341393  |
| 181 | 6 | 0 | 10.485382 | -4.057576 | 2.304782  |
| 182 | 6 | 0 | 8.859528  | -1.291294 | -0.550717 |
| 183 | 6 | 0 | 8.128138  | -4.058320 | -0.660446 |
| 184 | 6 | 0 | 7.929128  | -3.204740 | -1.778413 |
| 185 | 6 | 0 | 8.272761  | -1.821782 | -1.672776 |
| 186 | 6 | 0 | 7.203870  | -3.699045 | -2.887731 |
| 187 | 6 | 0 | 6.517623  | -4.887624 | -2.804397 |
| 188 | 6 | 0 | 6.466073  | -5.612484 | -1.582136 |
| 189 | 6 | 0 | 7.351847  | -5.236178 | -0.570713 |
| 190 | 6 | 0 | 11.070655 | -5.021121 | 3.308552  |
| 191 | 1 | 0 | 5.944148  | -5.232228 | -3.658144 |
| 192 | 1 | 0 | 7.341722  | -5.777139 | 0.369353  |
| 193 | 1 | 0 | 7.141426  | -3.094542 | -3.788813 |
| 194 | 1 | 0 | 7.891384  | -1.155196 | -2.440242 |
| 195 | 1 | 0 | 9.314472  | -5.529455 | 1.297180  |
| 196 | 1 | 0 | 10.649732 | -0.764606 | 1.422882  |
| 197 | 1 | 0 | 11.590620 | -2.351935 | 3.050609  |
| 198 | 1 | 0 | 12.164568 | -5.048436 | 3.243932  |
| 199 | 1 | 0 | 10.700530 | -6.037768 | 3.151638  |
| 200 | 1 | 0 | 10.818982 | -4.727722 | 4.334596  |

**Table S33.** Cartesian coordinate of  $E,R,Z,R,Z,R,E,S$  (31)

SCF Done: E(RB3LYP) = -4621.31677133 A.U. after 16 cycles

| Center Number | Atomic Number | Atomic Type | Coordinates (Angstroms) |           |          |
|---------------|---------------|-------------|-------------------------|-----------|----------|
|               |               |             | X                       | Y         | Z        |
| 1             | 6             | 0           | 2.653657                | -9.636067 | 3.839017 |
| 2             | 6             | 0           | 3.232869                | -8.940603 | 2.797393 |
| 3             | 6             | 0           | 2.478543                | -8.537086 | 1.670694 |
| 4             | 6             | 0           | 1.093926                | -8.886063 | 1.620396 |
| 5             | 6             | 0           | 0.532534                | -9.587037 | 2.711501 |



|    |   |   |           |            |           |
|----|---|---|-----------|------------|-----------|
| 6  | 6 | 0 | 1.280253  | -9.966476  | 3.815919  |
| 7  | 6 | 0 | 3.082172  | -7.810107  | 0.566618  |
| 8  | 6 | 0 | 0.310223  | -8.547488  | 0.440003  |
| 9  | 6 | 0 | 1.022220  | -8.159838  | -0.726792 |
| 10 | 6 | 0 | 2.390355  | -7.765360  | -0.617742 |
| 11 | 6 | 0 | 0.310438  | -7.996076  | -1.937399 |
| 12 | 6 | 0 | -1.063741 | -8.016486  | -1.951998 |
| 13 | 6 | 0 | -1.802102 | -8.137627  | -0.743176 |
| 14 | 6 | 0 | -1.102767 | -8.487761  | 0.412725  |
| 15 | 6 | 0 | 0.661391  | -10.730388 | 4.961269  |
| 16 | 1 | 0 | 0.864513  | -7.798813  | -2.851392 |
| 17 | 1 | 0 | -1.590214 | -7.870481  | -2.889000 |
| 18 | 1 | 0 | -1.647052 | -8.590319  | 1.345575  |
| 19 | 1 | 0 | 2.833726  | -7.267098  | -1.474391 |
| 20 | 1 | 0 | 4.290120  | -8.697034  | 2.830171  |
| 21 | 1 | 0 | 3.262792  | -9.942427  | 4.685791  |
| 22 | 1 | 0 | -0.513164 | -9.876517  | 2.666125  |
| 23 | 1 | 0 | 1.169509  | -11.688177 | 5.122655  |
| 24 | 1 | 0 | -0.396250 | -10.938857 | 4.779281  |
| 25 | 1 | 0 | 0.735070  | -10.168097 | 5.899683  |
| 26 | 6 | 0 | 3.831706  | -4.780854  | 3.686688  |
| 27 | 6 | 0 | 3.625578  | -5.764887  | 2.742061  |
| 28 | 6 | 0 | 4.488309  | -5.925625  | 1.628244  |
| 29 | 6 | 0 | 5.524226  | -4.957233  | 1.460048  |
| 30 | 6 | 0 | 5.726845  | -3.982812  | 2.464312  |
| 31 | 6 | 0 | 4.915400  | -3.883680  | 3.581445  |
| 32 | 6 | 0 | 4.333813  | -6.993209  | 0.642930  |
| 33 | 6 | 0 | 6.281454  | -4.929165  | 0.219058  |
| 34 | 6 | 0 | 6.184426  | -6.035589  | -0.666168 |
| 35 | 6 | 0 | 5.242532  | -7.076701  | -0.384191 |
| 36 | 6 | 0 | 6.871021  | -5.980334  | -1.905201 |
| 37 | 6 | 0 | 7.474425  | -4.814198  | -2.333808 |
| 38 | 6 | 0 | 7.461934  | -3.658919  | -1.514399 |
| 39 | 6 | 0 | 6.941147  | -3.764744  | -0.228421 |
| 40 | 6 | 0 | 5.160889  | -2.846975  | 4.649865  |
| 41 | 1 | 0 | 7.913926  | -4.762083  | -3.325904 |
| 42 | 1 | 0 | 6.892969  | -2.865188  | 0.374074  |
| 43 | 1 | 0 | 6.837864  | -6.846466  | -2.561308 |
| 44 | 1 | 0 | 5.153025  | -7.887271  | -1.102513 |
| 45 | 1 | 0 | 6.556676  | -3.290747  | 2.362720  |
| 46 | 1 | 0 | 2.783639  | -6.430630  | 2.865069  |
| 47 | 1 | 0 | 3.150057  | -4.701558  | 4.530023  |
| 48 | 1 | 0 | 6.003051  | -2.198329  | 4.394085  |
| 49 | 1 | 0 | 5.380604  | -3.315717  | 5.616483  |
| 50 | 1 | 0 | 4.279540  | -2.211907  | 4.796211  |
| 51 | 6 | 0 | -2.240789 | 5.533455   | 3.916008  |
| 52 | 6 | 0 | -2.589082 | 6.180400   | 2.748788  |
| 53 | 6 | 0 | -3.838387 | 5.955761   | 2.117476  |
| 54 | 6 | 0 | -4.701091 | 4.976365   | 2.688654  |
| 55 | 6 | 0 | -4.323015 | 4.350959   | 3.899344  |
| 56 | 6 | 0 | -3.119198 | 4.615462   | 4.530110  |
| 57 | 6 | 0 | -4.244537 | 6.651632   | 0.901152  |
| 58 | 6 | 0 | -5.920890 | 4.606572   | 1.989516  |
| 59 | 6 | 0 | -6.361728 | 5.405723   | 0.901837  |
| 60 | 6 | 0 | -5.497811 | 6.429649   | 0.390203  |
| 61 | 6 | 0 | -7.579749 | 5.054186   | 0.267481  |
| 62 | 6 | 0 | -8.243096 | 3.883942   | 0.578589  |
| 63 | 6 | 0 | -7.709951 | 2.977719   | 1.533954  |
| 64 | 6 | 0 | -6.597025 | 3.401610   | 2.258052  |

|     |   |   |           |           |           |
|-----|---|---|-----------|-----------|-----------|
| 65  | 6 | 0 | -2.744290 | 3.948568  | 5.830709  |
| 66  | 1 | 0 | -7.963585 | 5.696953  | -0.520752 |
| 67  | 1 | 0 | -9.153512 | 3.634702  | 0.042675  |
| 68  | 1 | 0 | -6.141410 | 2.718602  | 2.961191  |
| 69  | 1 | 0 | -5.810826 | 6.966872  | -0.501422 |
| 70  | 1 | 0 | -1.891007 | 6.881720  | 2.312463  |
| 71  | 1 | 0 | -1.276853 | 5.740770  | 4.374197  |
| 72  | 1 | 0 | -5.008448 | 3.651320  | 4.366712  |
| 73  | 1 | 0 | -2.610139 | 4.684994  | 6.631876  |
| 74  | 1 | 0 | -1.798759 | 3.401714  | 5.738217  |
| 75  | 1 | 0 | -3.511399 | 3.239721  | 6.153751  |
| 76  | 6 | 0 | -2.344293 | 10.451584 | 2.146063  |
| 77  | 6 | 0 | -3.016137 | 9.338884  | 1.682993  |
| 78  | 6 | 0 | -2.501633 | 8.560338  | 0.620268  |
| 79  | 6 | 0 | -1.258237 | 8.942374  | 0.033316  |
| 80  | 6 | 0 | -0.597332 | 10.086031 | 0.535496  |
| 81  | 6 | 0 | -1.114500 | 10.846815 | 1.573425  |
| 82  | 6 | 0 | -3.211837 | 7.399582  | 0.117548  |
| 83  | 6 | 0 | -0.708851 | 8.143526  | -1.054224 |
| 84  | 6 | 0 | -1.569068 | 7.208280  | -1.694241 |
| 85  | 6 | 0 | -2.809072 | 6.853129  | -1.072254 |
| 86  | 6 | 0 | -1.093126 | 6.499602  | -2.821317 |
| 87  | 6 | 0 | 0.231901  | 6.571183  | -3.193436 |
| 88  | 6 | 0 | 1.151049  | 7.339558  | -2.434703 |
| 89  | 6 | 0 | 0.652393  | 8.168310  | -1.431374 |
| 90  | 6 | 0 | -0.400045 | 12.076248 | 2.079894  |
| 91  | 1 | 0 | 0.602128  | 5.943775  | -3.998224 |
| 92  | 1 | 0 | 1.350458  | 8.777472  | -0.866140 |
| 93  | 1 | 0 | -1.768009 | 5.823185  | -3.339209 |
| 94  | 1 | 0 | -3.355089 | 6.007236  | -1.480360 |
| 95  | 1 | 0 | 0.331811  | 10.402472 | 0.070984  |
| 96  | 1 | 0 | -3.964151 | 9.050962  | 2.126754  |
| 97  | 1 | 0 | -2.769492 | 11.039430 | 2.955740  |
| 98  | 1 | 0 | 0.530104  | 12.253623 | 1.533534  |
| 99  | 1 | 0 | -0.151666 | 11.981750 | 3.143583  |
| 100 | 1 | 0 | -1.025098 | 12.970920 | 1.976850  |
| 101 | 6 | 0 | 6.117567  | 4.226455  | 2.097070  |
| 102 | 6 | 0 | 6.552286  | 3.801193  | 0.859153  |
| 103 | 6 | 0 | 6.123945  | 4.427715  | -0.338507 |
| 104 | 6 | 0 | 5.144218  | 5.459619  | -0.226989 |
| 105 | 6 | 0 | 4.745103  | 5.890637  | 1.059506  |
| 106 | 6 | 0 | 5.220767  | 5.308696  | 2.222029  |
| 107 | 6 | 0 | 6.609177  | 4.032847  | -1.657137 |
| 108 | 6 | 0 | 4.521390  | 5.988953  | -1.430043 |
| 109 | 6 | 0 | 5.078954  | 5.656040  | -2.693828 |
| 110 | 6 | 0 | 6.151170  | 4.708889  | -2.760387 |
| 111 | 6 | 0 | 4.447470  | 6.141901  | -3.866043 |
| 112 | 6 | 0 | 3.230754  | 6.791688  | -3.806222 |
| 113 | 6 | 0 | 2.598189  | 7.016663  | -2.558005 |
| 114 | 6 | 0 | 3.288335  | 6.673061  | -1.398867 |
| 115 | 6 | 0 | 4.794951  | 5.798654  | 3.584127  |
| 116 | 1 | 0 | 4.901442  | 5.929150  | -4.830598 |
| 117 | 1 | 0 | 2.731704  | 7.093677  | -4.722601 |
| 118 | 1 | 0 | 2.779938  | 6.799757  | -0.450658 |
| 119 | 1 | 0 | 6.528900  | 4.435302  | -3.742021 |
| 120 | 1 | 0 | 7.242911  | 2.971227  | 0.807056  |
| 121 | 1 | 0 | 6.478366  | 3.723556  | 2.990964  |
| 122 | 1 | 0 | 4.048838  | 6.718606  | 1.143743  |
| 123 | 1 | 0 | 5.650239  | 6.178364  | 4.155656  |

|     |   |   |            |           |           |
|-----|---|---|------------|-----------|-----------|
| 124 | 1 | 0 | 4.349661   | 4.990386  | 4.175764  |
| 125 | 1 | 0 | 4.059481   | 6.604129  | 3.509102  |
| 126 | 6 | 0 | 10.618228  | 3.174966  | 0.071744  |
| 127 | 6 | 0 | 9.434356   | 3.474777  | -0.570259 |
| 128 | 6 | 0 | 8.636173   | 2.462976  | -1.153726 |
| 129 | 6 | 0 | 9.088656   | 1.110666  | -1.076982 |
| 130 | 6 | 0 | 10.301736  | 0.840808  | -0.403312 |
| 131 | 6 | 0 | 11.072357  | 1.840722  | 0.170083  |
| 132 | 6 | 0 | 7.395066   | 2.773236  | -1.841801 |
| 133 | 6 | 0 | 8.310296   | 0.056224  | -1.712810 |
| 134 | 6 | 0 | 7.293586   | 0.447170  | -2.627180 |
| 135 | 6 | 0 | 6.843243   | 1.804688  | -2.639588 |
| 136 | 6 | 0 | 6.623741   | -0.545866 | -3.377645 |
| 137 | 6 | 0 | 6.826010   | -1.882539 | -3.115318 |
| 138 | 6 | 0 | 7.675789   | -2.285235 | -2.053249 |
| 139 | 6 | 0 | 8.449703   | -1.320056 | -1.415263 |
| 140 | 6 | 0 | 12.374561  | 1.529172  | 0.867081  |
| 141 | 1 | 0 | 6.244770   | -2.634458 | -3.640095 |
| 142 | 1 | 0 | 9.114100   | -1.630776 | -0.615151 |
| 143 | 1 | 0 | 5.886017   | -0.239603 | -4.114683 |
| 144 | 1 | 0 | 5.937993   | 2.026875  | -3.196866 |
| 145 | 1 | 0 | 10.665510  | -0.181565 | -0.366040 |
| 146 | 1 | 0 | 9.102292   | 4.505609  | -0.641543 |
| 147 | 1 | 0 | 11.215980  | 3.975786  | 0.499927  |
| 148 | 1 | 0 | 12.592448  | 0.458015  | 0.850060  |
| 149 | 1 | 0 | 12.351035  | 1.849991  | 1.915211  |
| 150 | 1 | 0 | 13.214707  | 2.049921  | 0.393011  |
| 151 | 6 | 0 | -5.512378  | -2.509376 | -3.878622 |
| 152 | 6 | 0 | -6.273723  | -2.732145 | -2.750937 |
| 153 | 6 | 0 | -6.128101  | -3.908043 | -1.971012 |
| 154 | 6 | 0 | -5.097242  | -4.818171 | -2.341509 |
| 155 | 6 | 0 | -4.359339  | -4.575859 | -3.524141 |
| 156 | 6 | 0 | -4.552605  | -3.450802 | -4.306542 |
| 157 | 6 | 0 | -6.952918  | -4.191110 | -0.799296 |
| 158 | 6 | 0 | -4.787445  | -5.938437 | -1.468435 |
| 159 | 6 | 0 | -5.654937  | -6.237729 | -0.384165 |
| 160 | 6 | 0 | -6.745725  | -5.351901 | -0.097341 |
| 161 | 6 | 0 | -5.330523  | -7.338846 | 0.449033  |
| 162 | 6 | 0 | -4.146943  | -8.037062 | 0.299474  |
| 163 | 6 | 0 | -3.210807  | -7.665119 | -0.699349 |
| 164 | 6 | 0 | -3.581851  | -6.652834 | -1.581579 |
| 165 | 6 | 0 | -3.763107  | -3.220257 | -5.571482 |
| 166 | 1 | 0 | -6.014085  | -7.604348 | 1.251610  |
| 167 | 1 | 0 | -3.919447  | -8.856167 | 0.975375  |
| 168 | 1 | 0 | -2.856246  | -6.314770 | -2.307822 |
| 169 | 1 | 0 | -7.372186  | -5.569446 | 0.764046  |
| 170 | 1 | 0 | -7.000629  | -1.986865 | -2.461637 |
| 171 | 1 | 0 | -5.660888  | -1.597049 | -4.450952 |
| 172 | 1 | 0 | -3.621352  | -5.303703 | -3.843986 |
| 173 | 1 | 0 | -3.037603  | -4.019780 | -5.744053 |
| 174 | 1 | 0 | -3.214468  | -2.272144 | -5.529492 |
| 175 | 1 | 0 | -4.420787  | -3.169704 | -6.447304 |
| 176 | 6 | 0 | -10.474040 | -2.553289 | -2.920002 |
| 177 | 6 | 0 | -9.481713  | -3.153953 | -2.172349 |
| 178 | 6 | 0 | -8.891673  | -2.492294 | -1.070848 |
| 179 | 6 | 0 | -9.340873  | -1.178910 | -0.744472 |
| 180 | 6 | 0 | -10.352383 | -0.591298 | -1.536473 |
| 181 | 6 | 0 | -10.927915 | -1.250996 | -2.612351 |
| 182 | 6 | 0 | -7.849014  | -3.115832 | -0.275078 |

|     |   |   |            |           |           |
|-----|---|---|------------|-----------|-----------|
| 183 | 6 | 0 | -8.746910  | -0.489672 | 0.391797  |
| 184 | 6 | 0 | -8.012282  | -1.268111 | 1.326600  |
| 185 | 6 | 0 | -7.557086  | -2.572021 | 0.949146  |
| 186 | 6 | 0 | -7.567425  | -0.644275 | 2.515717  |
| 187 | 6 | 0 | -7.644549  | 0.721318  | 2.667831  |
| 188 | 6 | 0 | -8.116720  | 1.548041  | 1.611231  |
| 189 | 6 | 0 | -8.748686  | 0.914625  | 0.539773  |
| 190 | 6 | 0 | -12.023360 | -0.613606 | -3.432140 |
| 191 | 1 | 0 | -7.266788  | 1.170845  | 3.579438  |
| 192 | 1 | 0 | -9.129353  | 1.512284  | -0.280605 |
| 193 | 1 | 0 | -7.097708  | -1.251035 | 3.285490  |
| 194 | 1 | 0 | -6.814137  | -3.050005 | 1.581598  |
| 195 | 1 | 0 | -10.719664 | 0.395760  | -1.270806 |
| 196 | 1 | 0 | -9.145832  | -4.156305 | -2.418982 |
| 197 | 1 | 0 | -10.920111 | -3.090994 | -3.752975 |
| 198 | 1 | 0 | -12.265217 | 0.388455  | -3.068109 |
| 199 | 1 | 0 | -12.941732 | -1.211528 | -3.403382 |
| 200 | 1 | 0 | -11.732115 | -0.526813 | -4.485515 |

---
